# Supplementary material
Source: publisher figshare collection journal article supplement (https://acs.figshare.com/ndownloader/files/3616587)
Supplement: Supplementary file 1 [file 3616587]

 
data_compound2 
  
_audit_creation_method            SHELXL-97 
_chemical_name_systematic 
; 
 ? 
; 
_chemical_name_common             ? 
_chemical_melting_point           ? 
_chemical_formula_moiety          'C48 H68 Th' 
_chemical_formula_sum 
 'C48 H68 Th' 
_chemical_formula_weight          877.06 
  
loop_ 
 _atom_type_symbol 
 _atom_type_description 
 _atom_type_scat_dispersion_real 
 _atom_type_scat_dispersion_imag 
 _atom_type_scat_source 
 'C'  'C'   0.0033   0.0016 
 'International Tables Vol C Tables 4.2.6.8 and 6.1.1.4' 
 'H'  'H'   0.0000   0.0000 
 'International Tables Vol C Tables 4.2.6.8 and 6.1.1.4' 
 'Th'  'Th'  -7.2400   8.8979 
 'International Tables Vol C Tables 4.2.6.8 and 6.1.1.4' 
  
_symmetry_cell_setting            Monoclinic 
_symmetry_space_group_name_H-M    C2/c 
  
loop_ 
 _symmetry_equiv_pos_as_xyz 
 'x, y, z' 
 '-x, y, -z+1/2' 
 'x+1/2, y+1/2, z' 
 '-x+1/2, y+1/2, -z+1/2' 
 '-x, -y, -z' 
 'x, -y, z-1/2' 
 '-x+1/2, -y+1/2, -z' 
 'x+1/2, -y+1/2, z-1/2' 
  
_cell_length_a                    15.8091(11) 
_cell_length_b                    13.0726(9) 
_cell_length_c                    21.0353(15) 
_cell_angle_alpha                 90.00 
_cell_angle_beta                  105.2277(11) 
_cell_angle_gamma                 90.00 
_cell_volume                      4194.6(5) 
_cell_formula_units_Z             4 
_cell_measurement_temperature     110(2) 
_cell_measurement_reflns_used     8573 
_cell_measurement_theta_min       2.43 
_cell_measurement_theta_max       27.58 
  
_exptl_crystal_description        block 
_exptl_crystal_colour             yellow 
_exptl_crystal_size_max           0.45 
_exptl_crystal_size_mid           0.38 
_exptl_crystal_size_min           0.25 
_exptl_crystal_density_meas       ? 
_exptl_crystal_density_diffrn     1.389 
_exptl_crystal_density_method     'not measured' 
_exptl_crystal_F_000              1784 
_exptl_absorpt_coefficient_mu     3.585 
_exptl_absorpt_correction_type    Multi-scan 
_exptl_absorpt_correction_T_min   0.2953 
_exptl_absorpt_correction_T_max   0.4677 
_exptl_absorpt_process_details    SADABS 
  
_exptl_special_details 
; 
 ? 
; 
  
_diffrn_ambient_temperature       110(2) 
_diffrn_radiation_wavelength      0.71073 
_diffrn_radiation_type            MoK\a 
_diffrn_radiation_source          'fine-focus sealed tube' 
_diffrn_radiation_monochromator   graphite 
_diffrn_measurement_device_type   'Bruker APEX-II CCD' 
_diffrn_measurement_method        '\f and \w scans' 
_diffrn_detector_area_resol_mean  ? 
_diffrn_reflns_number             12141 
_diffrn_reflns_av_R_equivalents   0.0239 
_diffrn_reflns_av_sigmaI/netI     0.0300 
_diffrn_reflns_limit_h_min        -18 
_diffrn_reflns_limit_h_max        20 
_diffrn_reflns_limit_k_min        -17 
_diffrn_reflns_limit_k_max        16 
_diffrn_reflns_limit_l_min        -24 
_diffrn_reflns_limit_l_max        27 
_diffrn_reflns_theta_min          2.01 
_diffrn_reflns_theta_max          27.58 
_reflns_number_total              4816 
_reflns_number_gt                 4503 
_reflns_threshold_expression      >2sigma(I) 
  
_computing_data_collection        'Bruker APEX2' 
_computing_cell_refinement        'Bruker SAINT' 
_computing_data_reduction         'Bruker SAINT' 
_computing_structure_solution     'SHELXS-97 (Sheldrick, 2008)' 
_computing_structure_refinement   'SHELXL-97 (Sheldrick, 2008)' 
_computing_molecular_graphics     'Bruker SHELXTL' 
_computing_publication_material   'Bruker SHELXTL' 
  
_refine_special_details 
; 
 Refinement of F^2^ against ALL reflections.  The weighted R-factor wR and 
 goodness of fit S are based on F^2^, conventional R-factors R are based 
 on F, with F set to zero for negative F^2^. The threshold expression of 
 F^2^ > 2sigma(F^2^) is used only for calculating R-factors(gt) etc. and is 
 not relevant to the choice of reflections for refinement.  R-factors based 
 on F^2^ are statistically about twice as large as those based on F, and R- 
 factors based on ALL data will be even larger. 
; 
  
_refine_ls_structure_factor_coef  Fsqd 
_refine_ls_matrix_type            full 
_refine_ls_weighting_scheme       calc 
_refine_ls_weighting_details 
 'calc w=1/[\s^2^(Fo^2^)+(0.0209P)^2^+2.1618P] where P=(Fo^2^+2Fc^2^)/3' 
_atom_sites_solution_primary      direct 
_atom_sites_solution_secondary    difmap 
_atom_sites_solution_hydrogens    geom 
_refine_ls_hydrogen_treatment     constr 
_refine_ls_extinction_method      none 
_refine_ls_extinction_coef        ? 
_refine_ls_number_reflns          4816 
_refine_ls_number_parameters      231 
_refine_ls_number_restraints      0 
_refine_ls_R_factor_all           0.0220 
_refine_ls_R_factor_gt            0.0190 
_refine_ls_wR_factor_ref          0.0428 
_refine_ls_wR_factor_gt           0.0420 
_refine_ls_goodness_of_fit_ref    1.027 
_refine_ls_restrained_S_all       1.027 
_refine_ls_shift/su_max           0.001 
_refine_ls_shift/su_mean          0.000 
  
loop_ 
 _atom_site_label 
 _atom_site_type_symbol 
 _atom_site_fract_x 
 _atom_site_fract_y 
 _atom_site_fract_z 
 _atom_site_U_iso_or_equiv 
 _atom_site_adp_type 
 _atom_site_occupancy 
 _atom_site_symmetry_multiplicity 
 _atom_site_calc_flag 
 _atom_site_refinement_flags 
 _atom_site_disorder_assembly 
 _atom_site_disorder_group 
C1 C 0.14925(14) 0.50243(16) 0.86537(10) 0.0136(4) Uani 1 1 d . . . 
C2 C 0.12002(14) 0.60659(16) 0.85144(10) 0.0143(4) Uani 1 1 d . . . 
C3 C 0.13365(14) 0.63107(16) 0.78860(10) 0.0143(4) Uani 1 1 d . . . 
H3 H 0.1188 0.6945 0.7665 0.017 Uiso 1 1 calc R . . 
C4 C 0.17214(13) 0.54802(17) 0.76411(10) 0.0134(4) Uani 1 1 d . . . 
C5 C 0.17979(13) 0.46894(16) 0.81060(10) 0.0133(4) Uani 1 1 d . . . 
H5 H 0.2021 0.4026 0.8062 0.016 Uiso 1 1 calc R . . 
C6 C 0.16525(14) 0.43551(17) 0.92777(10) 0.0161(4) Uani 1 1 d . . . 
C7 C 0.23718(17) 0.48426(19) 0.98353(11) 0.0237(5) Uani 1 1 d . . . 
H7A H 0.2167 0.5504 0.9955 0.036 Uiso 1 1 calc R . . 
H7B H 0.2902 0.4944 0.9685 0.036 Uiso 1 1 calc R . . 
H7C H 0.2504 0.4390 1.0220 0.036 Uiso 1 1 calc R . . 
C8 C 0.08249(15) 0.41380(18) 0.95078(11) 0.0194(5) Uani 1 1 d . . . 
H8A H 0.0983 0.3741 0.9917 0.029 Uiso 1 1 calc R . . 
H8B H 0.0407 0.3748 0.9168 0.029 Uiso 1 1 calc R . . 
H8C H 0.0557 0.4786 0.9585 0.029 Uiso 1 1 calc R . . 
C9 C 0.20037(16) 0.33030(18) 0.91431(11) 0.0220(5) Uani 1 1 d . . . 
H9A H 0.2056 0.2860 0.9527 0.033 Uiso 1 1 calc R . . 
H9B H 0.2581 0.3386 0.9059 0.033 Uiso 1 1 calc R . . 
H9C H 0.1598 0.2993 0.8758 0.033 Uiso 1 1 calc R . . 
C10 C 0.09960(15) 0.69724(17) 0.89241(11) 0.0172(4) Uani 1 1 d . . . 
C11 C 0.18506(16) 0.75891(18) 0.91553(11) 0.0234(5) Uani 1 1 d . . . 
H11A H 0.1744 0.8200 0.9392 0.035 Uiso 1 1 calc R . . 
H11B H 0.2054 0.7794 0.8772 0.035 Uiso 1 1 calc R . . 
H11C H 0.2299 0.7166 0.9449 0.035 Uiso 1 1 calc R . . 
C12 C 0.06686(17) 0.67235(19) 0.95318(12) 0.0260(5) Uani 1 1 d . . . 
H12A H 0.1101 0.6295 0.9835 0.039 Uiso 1 1 calc R . . 
H12B H 0.0110 0.6356 0.9394 0.039 Uiso 1 1 calc R . . 
H12C H 0.0585 0.7360 0.9754 0.039 Uiso 1 1 calc R . . 
C13 C 0.03027(16) 0.76823(18) 0.84927(12) 0.0249(5) Uani 1 1 d . . . 
H13A H -0.0237 0.7295 0.8309 0.037 Uiso 1 1 calc R . . 
H13B H 0.0523 0.7956 0.8133 0.037 Uiso 1 1 calc R . . 
H13C H 0.0180 0.8248 0.8761 0.037 Uiso 1 1 calc R . . 
C14 C 0.19766(14) 0.54220(17) 0.69921(10) 0.0156(4) Uani 1 1 d . . . 
C15 C 0.27763(16) 0.47266(18) 0.70619(12) 0.0225(5) Uani 1 1 d . . . 
H15A H 0.3268 0.4992 0.7410 0.034 Uiso 1 1 calc R . . 
H15B H 0.2940 0.4709 0.6644 0.034 Uiso 1 1 calc R . . 
H15C H 0.2633 0.4033 0.7177 0.034 Uiso 1 1 calc R . . 
C16 C 0.21969(15) 0.64857(17) 0.67725(11) 0.0202(5) Uani 1 1 d . . . 
H16A H 0.1685 0.6934 0.6715 0.030 Uiso 1 1 calc R . . 
H16B H 0.2356 0.6428 0.6354 0.030 Uiso 1 1 calc R . . 
H16C H 0.2690 0.6775 0.7108 0.030 Uiso 1 1 calc R . . 
C17 C 0.11937(16) 0.49884(17) 0.64660(11) 0.0192(5) Uani 1 1 d . . . 
H17A H 0.1046 0.4309 0.6602 0.029 Uiso 1 1 calc R . . 
H17B H 0.1347 0.4935 0.6045 0.029 Uiso 1 1 calc R . . 
H17C H 0.0689 0.5445 0.6415 0.029 Uiso 1 1 calc R . . 
C18 C -0.01480(14) 0.30555(16) 0.77714(10) 0.0140(4) Uani 1 1 d . . . 
C19 C -0.02967(14) 0.21701(16) 0.81643(10) 0.0146(4) Uani 1 1 d . . . 
C20 C 0.03364(15) 0.14003(18) 0.83582(13) 0.0235(5) Uani 1 1 d . . . 
H20 H 0.0859 0.1433 0.8217 0.028 Uiso 1 1 calc R . . 
C21 C 0.02142(17) 0.0594(2) 0.87512(14) 0.0300(6) Uani 1 1 d . . . 
H21 H 0.0662 0.0096 0.8891 0.036 Uiso 1 1 calc R . . 
C22 C -0.05593(18) 0.0509(2) 0.89424(13) 0.0300(6) Uani 1 1 d . . . 
H22 H -0.0645 -0.0049 0.9208 0.036 Uiso 1 1 calc R . . 
C23 C -0.12017(16) 0.12425(18) 0.87434(12) 0.0246(5) Uani 1 1 d . . . 
H23 H -0.1739 0.1180 0.8862 0.030 Uiso 1 1 calc R . . 
C24 C -0.10669(14) 0.20704(17) 0.83703(11) 0.0181(5) Uani 1 1 d . . . 
H24 H -0.1507 0.2582 0.8252 0.022 Uiso 1 1 calc R . . 
Th1 Th 0.0000 0.481451(8) 0.7500 0.01003(4) Uani 1 2 d S . . 
  
loop_ 
 _atom_site_aniso_label 
 _atom_site_aniso_U_11 
 _atom_site_aniso_U_22 
 _atom_site_aniso_U_33 
 _atom_site_aniso_U_23 
 _atom_site_aniso_U_13 
 _atom_site_aniso_U_12 
C1 0.0115(10) 0.0148(12) 0.0143(10) -0.0010(7) 0.0032(8) -0.0031(7) 
C2 0.0151(11) 0.0130(11) 0.0148(10) -0.0029(8) 0.0038(8) -0.0044(8) 
C3 0.0155(11) 0.0107(11) 0.0163(10) -0.0003(8) 0.0030(8) -0.0040(8) 
C4 0.0118(10) 0.0145(11) 0.0135(10) -0.0021(8) 0.0028(8) -0.0032(8) 
C5 0.0127(10) 0.0123(12) 0.0148(10) -0.0008(8) 0.0034(8) -0.0012(8) 
C6 0.0196(11) 0.0156(11) 0.0133(10) 0.0018(8) 0.0044(8) -0.0009(9) 
C7 0.0251(13) 0.0282(13) 0.0150(11) 0.0018(9) 0.0002(9) -0.0058(10) 
C8 0.0225(12) 0.0194(12) 0.0173(11) 0.0028(9) 0.0067(9) -0.0012(9) 
C9 0.0252(13) 0.0216(13) 0.0192(11) 0.0072(9) 0.0059(10) 0.0065(9) 
C10 0.0223(12) 0.0142(11) 0.0154(10) -0.0044(8) 0.0056(9) -0.0026(9) 
C11 0.0286(13) 0.0186(13) 0.0220(12) -0.0063(9) 0.0051(10) -0.0070(10) 
C12 0.0369(15) 0.0219(13) 0.0239(13) -0.0081(10) 0.0164(11) -0.0031(10) 
C13 0.0287(14) 0.0180(13) 0.0273(13) -0.0080(10) 0.0061(10) 0.0045(10) 
C14 0.0164(11) 0.0160(12) 0.0156(10) 0.0000(8) 0.0066(8) -0.0019(8) 
C15 0.0222(12) 0.0241(14) 0.0244(12) -0.0018(9) 0.0121(10) 0.0008(9) 
C16 0.0247(12) 0.0202(13) 0.0187(11) 0.0011(9) 0.0111(9) -0.0060(9) 
C17 0.0215(12) 0.0217(13) 0.0154(10) -0.0006(8) 0.0066(9) -0.0065(9) 
C18 0.0097(10) 0.0124(11) 0.0195(11) -0.0007(8) 0.0031(8) -0.0007(8) 
C19 0.0158(11) 0.0110(11) 0.0174(10) -0.0008(8) 0.0047(8) -0.0022(8) 
C20 0.0184(12) 0.0155(12) 0.0398(14) 0.0050(10) 0.0132(10) 0.0015(9) 
C21 0.0254(13) 0.0183(13) 0.0472(16) 0.0122(12) 0.0113(12) 0.0058(10) 
C22 0.0351(15) 0.0189(12) 0.0392(15) 0.0124(11) 0.0155(12) -0.0028(11) 
C23 0.0245(13) 0.0201(13) 0.0338(14) 0.0029(10) 0.0156(11) -0.0029(10) 
C24 0.0160(11) 0.0144(11) 0.0252(12) -0.0001(9) 0.0078(9) -0.0001(8) 
Th1 0.01117(6) 0.00772(6) 0.01159(6) 0.000 0.00371(4) 0.000 
  
_geom_special_details 
; 
 All esds (except the esd in the dihedral angle between two l.s. planes) 
 are estimated using the full covariance matrix.  The cell esds are taken 
 into account individually in the estimation of esds in distances, angles 
 and torsion angles; correlations between esds in cell parameters are only 
 used when they are defined by crystal symmetry.  An approximate (isotropic) 
 treatment of cell esds is used for estimating esds involving l.s. planes. 
; 
  
loop_ 
 _geom_bond_atom_site_label_1 
 _geom_bond_atom_site_label_2 
 _geom_bond_distance 
 _geom_bond_site_symmetry_2 
 _geom_bond_publ_flag 
C1 C5 1.430(3) . ? 
C1 C2 1.443(3) . ? 
C1 C6 1.542(3) . ? 
C1 Th1 2.920(2) . ? 
C2 C3 1.430(3) . ? 
C2 C10 1.548(3) . ? 
C2 Th1 2.950(2) . ? 
C3 C4 1.407(3) . ? 
C3 Th1 2.837(2) . ? 
C3 H3 0.9500 . ? 
C4 C5 1.406(3) . ? 
C4 C14 1.524(3) . ? 
C4 Th1 2.798(2) . ? 
C5 Th1 2.798(2) . ? 
C5 H5 0.9500 . ? 
C6 C8 1.536(3) . ? 
C6 C9 1.537(3) . ? 
C6 C7 1.541(3) . ? 
C7 H7A 0.9800 . ? 
C7 H7B 0.9800 . ? 
C7 H7C 0.9800 . ? 
C8 H8A 0.9800 . ? 
C8 H8B 0.9800 . ? 
C8 H8C 0.9800 . ? 
C9 H9A 0.9800 . ? 
C9 H9B 0.9800 . ? 
C9 H9C 0.9800 . ? 
C10 C12 1.535(3) . ? 
C10 C13 1.537(3) . ? 
C10 C11 1.538(3) . ? 
C11 H11A 0.9800 . ? 
C11 H11B 0.9800 . ? 
C11 H11C 0.9800 . ? 
C12 H12A 0.9800 . ? 
C12 H12B 0.9800 . ? 
C12 H12C 0.9800 . ? 
C13 H13A 0.9800 . ? 
C13 H13B 0.9800 . ? 
C13 H13C 0.9800 . ? 
C14 C15 1.533(3) . ? 
C14 C16 1.534(3) . ? 
C14 C17 1.536(3) . ? 
C15 H15A 0.9800 . ? 
C15 H15B 0.9800 . ? 
C15 H15C 0.9800 . ? 
C16 H16A 0.9800 . ? 
C16 H16B 0.9800 . ? 
C16 H16C 0.9800 . ? 
C17 H17A 0.9800 . ? 
C17 H17B 0.9800 . ? 
C17 H17C 0.9800 . ? 
C18 C18 1.343(4) 2_556 ? 
C18 C19 1.477(3) . ? 
C18 Th1 2.395(2) . ? 
C19 C24 1.402(3) . ? 
C19 C20 1.402(3) . ? 
C20 C21 1.384(3) . ? 
C20 H20 0.9500 . ? 
C21 C22 1.388(4) . ? 
C21 H21 0.9500 . ? 
C22 C23 1.379(4) . ? 
C22 H22 0.9500 . ? 
C23 C24 1.386(3) . ? 
C23 H23 0.9500 . ? 
C24 H24 0.9500 . ? 
Th1 C18 2.395(2) 2_556 ? 
Th1 C5 2.798(2) 2_556 ? 
Th1 C4 2.798(2) 2_556 ? 
Th1 C3 2.837(2) 2_556 ? 
Th1 C1 2.920(2) 2_556 ? 
Th1 C2 2.950(2) 2_556 ? 
  
loop_ 
 _geom_angle_atom_site_label_1 
 _geom_angle_atom_site_label_2 
 _geom_angle_atom_site_label_3 
 _geom_angle 
 _geom_angle_site_symmetry_1 
 _geom_angle_site_symmetry_3 
 _geom_angle_publ_flag 
C5 C1 C2 106.45(18) . . ? 
C5 C1 C6 119.84(18) . . ? 
C2 C1 C6 132.88(19) . . ? 
C5 C1 Th1 70.83(12) . . ? 
C2 C1 Th1 76.94(12) . . ? 
C6 C1 Th1 124.77(13) . . ? 
C3 C2 C1 106.32(18) . . ? 
C3 C2 C10 116.56(19) . . ? 
C1 C2 C10 135.37(19) . . ? 
C3 C2 Th1 71.34(11) . . ? 
C1 C2 Th1 74.60(11) . . ? 
C10 C2 Th1 129.68(14) . . ? 
C4 C3 C2 110.51(19) . . ? 
C4 C3 Th1 74.00(12) . . ? 
C2 C3 Th1 80.13(12) . . ? 
C4 C3 H3 124.7 . . ? 
C2 C3 H3 124.7 . . ? 
Th1 C3 H3 113.1 . . ? 
C5 C4 C3 106.21(18) . . ? 
C5 C4 C14 126.3(2) . . ? 
C3 C4 C14 127.48(19) . . ? 
C5 C4 Th1 75.45(12) . . ? 
C3 C4 Th1 77.09(12) . . ? 
C14 C4 Th1 111.62(13) . . ? 
C4 C5 C1 110.47(19) . . ? 
C4 C5 Th1 75.44(12) . . ? 
C1 C5 Th1 80.30(12) . . ? 
C4 C5 H5 124.8 . . ? 
C1 C5 H5 124.8 . . ? 
Th1 C5 H5 111.6 . . ? 
C8 C6 C9 105.75(19) . . ? 
C8 C6 C7 110.86(18) . . ? 
C9 C6 C7 106.27(19) . . ? 
C8 C6 C1 114.22(18) . . ? 
C9 C6 C1 109.71(17) . . ? 
C7 C6 C1 109.66(18) . . ? 
C6 C7 H7A 109.5 . . ? 
C6 C7 H7B 109.5 . . ? 
H7A C7 H7B 109.5 . . ? 
C6 C7 H7C 109.5 . . ? 
H7A C7 H7C 109.5 . . ? 
H7B C7 H7C 109.5 . . ? 
C6 C8 H8A 109.5 . . ? 
C6 C8 H8B 109.5 . . ? 
H8A C8 H8B 109.5 . . ? 
C6 C8 H8C 109.5 . . ? 
H8A C8 H8C 109.5 . . ? 
H8B C8 H8C 109.5 . . ? 
C6 C9 H9A 109.5 . . ? 
C6 C9 H9B 109.5 . . ? 
H9A C9 H9B 109.5 . . ? 
C6 C9 H9C 109.5 . . ? 
H9A C9 H9C 109.5 . . ? 
H9B C9 H9C 109.5 . . ? 
C12 C10 C13 106.0(2) . . ? 
C12 C10 C11 107.95(19) . . ? 
C13 C10 C11 107.53(19) . . ? 
C12 C10 C2 117.80(19) . . ? 
C13 C10 C2 110.73(17) . . ? 
C11 C10 C2 106.43(18) . . ? 
C10 C11 H11A 109.5 . . ? 
C10 C11 H11B 109.5 . . ? 
H11A C11 H11B 109.5 . . ? 
C10 C11 H11C 109.5 . . ? 
H11A C11 H11C 109.5 . . ? 
H11B C11 H11C 109.5 . . ? 
C10 C12 H12A 109.5 . . ? 
C10 C12 H12B 109.5 . . ? 
H12A C12 H12B 109.5 . . ? 
C10 C12 H12C 109.5 . . ? 
H12A C12 H12C 109.5 . . ? 
H12B C12 H12C 109.5 . . ? 
C10 C13 H13A 109.5 . . ? 
C10 C13 H13B 109.5 . . ? 
H13A C13 H13B 109.5 . . ? 
C10 C13 H13C 109.5 . . ? 
H13A C13 H13C 109.5 . . ? 
H13B C13 H13C 109.5 . . ? 
C4 C14 C15 110.47(18) . . ? 
C4 C14 C16 111.04(18) . . ? 
C15 C14 C16 108.65(18) . . ? 
C4 C14 C17 108.14(18) . . ? 
C15 C14 C17 109.78(18) . . ? 
C16 C14 C17 108.75(18) . . ? 
C14 C15 H15A 109.5 . . ? 
C14 C15 H15B 109.5 . . ? 
H15A C15 H15B 109.5 . . ? 
C14 C15 H15C 109.5 . . ? 
H15A C15 H15C 109.5 . . ? 
H15B C15 H15C 109.5 . . ? 
C14 C16 H16A 109.5 . . ? 
C14 C16 H16B 109.5 . . ? 
H16A C16 H16B 109.5 . . ? 
C14 C16 H16C 109.5 . . ? 
H16A C16 H16C 109.5 . . ? 
H16B C16 H16C 109.5 . . ? 
C14 C17 H17A 109.5 . . ? 
C14 C17 H17B 109.5 . . ? 
H17A C17 H17B 109.5 . . ? 
C14 C17 H17C 109.5 . . ? 
H17A C17 H17C 109.5 . . ? 
H17B C17 H17C 109.5 . . ? 
C18 C18 C19 128.19(12) 2_556 . ? 
C18 C18 Th1 73.72(5) 2_556 . ? 
C19 C18 Th1 157.78(15) . . ? 
C24 C19 C20 117.1(2) . . ? 
C24 C19 C18 121.7(2) . . ? 
C20 C19 C18 121.3(2) . . ? 
C21 C20 C19 121.3(2) . . ? 
C21 C20 H20 119.4 . . ? 
C19 C20 H20 119.4 . . ? 
C20 C21 C22 120.4(2) . . ? 
C20 C21 H21 119.8 . . ? 
C22 C21 H21 119.8 . . ? 
C23 C22 C21 119.4(2) . . ? 
C23 C22 H22 120.3 . . ? 
C21 C22 H22 120.3 . . ? 
C22 C23 C24 120.3(2) . . ? 
C22 C23 H23 119.9 . . ? 
C24 C23 H23 119.9 . . ? 
C23 C24 C19 121.5(2) . . ? 
C23 C24 H24 119.2 . . ? 
C19 C24 H24 119.2 . . ? 
C18 Th1 C18 32.55(10) 2_556 . ? 
C18 Th1 C5 89.22(7) 2_556 2_556 ? 
C18 Th1 C5 84.34(7) . 2_556 ? 
C18 Th1 C4 99.83(7) 2_556 . ? 
C18 Th1 C4 115.24(7) . . ? 
C5 Th1 C4 155.51(6) 2_556 . ? 
C18 Th1 C4 115.24(7) 2_556 2_556 ? 
C18 Th1 C4 99.83(7) . 2_556 ? 
C5 Th1 C4 29.11(6) 2_556 2_556 ? 
C4 Th1 C4 143.75(9) . 2_556 ? 
C18 Th1 C5 84.34(7) 2_556 . ? 
C18 Th1 C5 89.22(7) . . ? 
C5 Th1 C5 173.30(9) 2_556 . ? 
C4 Th1 C5 29.11(6) . . ? 
C4 Th1 C5 155.51(6) 2_556 . ? 
C18 Th1 C3 128.17(7) 2_556 . ? 
C18 Th1 C3 134.88(7) . . ? 
C5 Th1 C3 139.63(6) 2_556 . ? 
C4 Th1 C3 28.91(6) . . ? 
C4 Th1 C3 116.52(6) 2_556 . ? 
C5 Th1 C3 47.06(6) . . ? 
C18 Th1 C3 134.88(7) 2_556 2_556 ? 
C18 Th1 C3 128.17(7) . 2_556 ? 
C5 Th1 C3 47.06(6) 2_556 2_556 ? 
C4 Th1 C3 116.52(6) . 2_556 ? 
C4 Th1 C3 28.91(6) 2_556 2_556 ? 
C5 Th1 C3 139.63(6) . 2_556 ? 
C3 Th1 C3 92.83(9) . 2_556 ? 
C18 Th1 C1 90.02(6) 2_556 2_556 ? 
C18 Th1 C1 100.37(6) . 2_556 ? 
C5 Th1 C1 28.87(6) 2_556 2_556 ? 
C4 Th1 C1 127.60(6) . 2_556 ? 
C4 Th1 C1 48.04(6) 2_556 2_556 ? 
C5 Th1 C1 152.47(6) . 2_556 ? 
C3 Th1 C1 123.48(6) . 2_556 ? 
C3 Th1 C1 47.06(6) 2_556 2_556 ? 
C18 Th1 C1 100.37(6) 2_556 . ? 
C18 Th1 C1 90.02(6) . . ? 
C5 Th1 C1 152.47(6) 2_556 . ? 
C4 Th1 C1 48.04(6) . . ? 
C4 Th1 C1 127.60(6) 2_556 . ? 
C5 Th1 C1 28.87(6) . . ? 
C3 Th1 C1 47.06(6) . . ? 
C3 Th1 C1 123.48(6) 2_556 . ? 
C1 Th1 C1 169.22(8) 2_556 . ? 
C18 Th1 C2 116.39(7) 2_556 2_556 ? 
C18 Th1 C2 128.33(7) . 2_556 ? 
C5 Th1 C2 47.11(6) 2_556 2_556 ? 
C4 Th1 C2 109.10(6) . 2_556 ? 
C4 Th1 C2 47.77(6) 2_556 2_556 ? 
C5 Th1 C2 138.20(6) . 2_556 ? 
C3 Th1 C2 96.54(6) . 2_556 ? 
C3 Th1 C2 28.53(6) 2_556 2_556 ? 
C1 Th1 C2 28.46(6) 2_556 2_556 ? 
C1 Th1 C2 140.80(6) . 2_556 ? 
C18 Th1 C2 128.33(7) 2_556 . ? 
C18 Th1 C2 116.39(7) . . ? 
C5 Th1 C2 138.20(6) 2_556 . ? 
C4 Th1 C2 47.77(6) . . ? 
C4 Th1 C2 109.10(6) 2_556 . ? 
C5 Th1 C2 47.11(6) . . ? 
C3 Th1 C2 28.53(6) . . ? 
C3 Th1 C2 96.54(6) 2_556 . ? 
C1 Th1 C2 140.80(6) 2_556 . ? 
C1 Th1 C2 28.46(6) . . ? 
C2 Th1 C2 112.64(9) 2_556 . ? 
  
_diffrn_measured_fraction_theta_max    0.990 
_diffrn_reflns_theta_full              27.58 
_diffrn_measured_fraction_theta_full   0.990 
_refine_diff_density_max    1.194 
_refine_diff_density_min   -0.984 
_refine_diff_density_rms    0.082 

#===END
 
data_compound3 
  
_audit_creation_method            SHELXL-97 
_chemical_name_systematic 
; 
 ? 
; 
_chemical_name_common             ? 
_chemical_melting_point           ? 
_chemical_formula_moiety          'C61 H85 Cl O Th' 
_chemical_formula_sum 
 'C61 H85 Cl O Th' 
_chemical_formula_weight          1101.78 
  
loop_ 
 _atom_type_symbol 
 _atom_type_description 
 _atom_type_scat_dispersion_real 
 _atom_type_scat_dispersion_imag 
 _atom_type_scat_source 
 'C'  'C'   0.0033   0.0016 
 'International Tables Vol C Tables 4.2.6.8 and 6.1.1.4' 
 'H'  'H'   0.0000   0.0000 
 'International Tables Vol C Tables 4.2.6.8 and 6.1.1.4' 
 'O'  'O'   0.0106   0.0060 
 'International Tables Vol C Tables 4.2.6.8 and 6.1.1.4' 
 'Cl'  'Cl'   0.1484   0.1585 
 'International Tables Vol C Tables 4.2.6.8 and 6.1.1.4' 
 'Th'  'Th'  -7.2400   8.8979 
 'International Tables Vol C Tables 4.2.6.8 and 6.1.1.4' 
  
_symmetry_cell_setting            Triclinic 
_symmetry_space_group_name_H-M    P-1 
  
loop_ 
 _symmetry_equiv_pos_as_xyz 
 'x, y, z' 
 '-x, -y, -z' 
  
_cell_length_a                    10.6273(8) 
_cell_length_b                    12.6345(10) 
_cell_length_c                    21.4306(16) 
_cell_angle_alpha                 92.1720(10) 
_cell_angle_beta                  103.9650(10) 
_cell_angle_gamma                 104.8850(10) 
_cell_volume                      2683.4(4) 
_cell_formula_units_Z             2 
_cell_measurement_temperature     100(2) 
_cell_measurement_reflns_used     9984 
_cell_measurement_theta_min       2.45     
_cell_measurement_theta_max       27.56 
  
_exptl_crystal_description        block 
_exptl_crystal_colour             colorless 
_exptl_crystal_size_max           0.30 
_exptl_crystal_size_mid           0.20 
_exptl_crystal_size_min           0.20 
_exptl_crystal_density_meas       ? 
_exptl_crystal_density_diffrn     1.364 
_exptl_crystal_density_method     'not measured' 
_exptl_crystal_F_000              1132 
_exptl_absorpt_coefficient_mu     2.867 
_exptl_absorpt_correction_type    Multi-scan
_exptl_absorpt_correction_T_min   0.4801 
_exptl_absorpt_correction_T_max   0.5979 
_exptl_absorpt_process_details    SADABS 
  
_exptl_special_details 
; 
 ? 
; 
  
_diffrn_ambient_temperature       100(2) 
_diffrn_radiation_wavelength      0.71073 
_diffrn_radiation_type            MoK\a 
_diffrn_radiation_source          'fine-focus sealed tube' 
_diffrn_radiation_monochromator   graphite 
_diffrn_measurement_device_type   'Bruker APEX-II CCD' 
_diffrn_measurement_method        '\f and \w scans' 
_diffrn_detector_area_resol_mean  ? 
_diffrn_reflns_number             17834 
_diffrn_reflns_av_R_equivalents   0.0192 
_diffrn_reflns_av_sigmaI/netI     0.0376 
_diffrn_reflns_limit_h_min        -12 
_diffrn_reflns_limit_h_max        13 
_diffrn_reflns_limit_k_min        -16 
_diffrn_reflns_limit_k_max        7 
_diffrn_reflns_limit_l_min        -27 
_diffrn_reflns_limit_l_max        27 
_diffrn_reflns_theta_min          1.97 
_diffrn_reflns_theta_max          27.56 
_reflns_number_total              12307 
_reflns_number_gt                 11203 
_reflns_threshold_expression      >2sigma(I) 
  
_computing_data_collection        'Bruker APEX2' 
_computing_cell_refinement        'Bruker SAINT' 
_computing_data_reduction         'Bruker SAINT' 
_computing_structure_solution     'SHELXS-97 (Sheldrick, 2008)' 
_computing_structure_refinement   'SHELXL-97 (Sheldrick, 2008)' 
_computing_molecular_graphics     'Bruker SHELXTL' 
_computing_publication_material   'Bruker SHELXTL' 
  
_refine_special_details 
; 
 Refinement of F^2^ against ALL reflections.  The weighted R-factor wR and 
 goodness of fit S are based on F^2^, conventional R-factors R are based 
 on F, with F set to zero for negative F^2^. The threshold expression of 
 F^2^ > 2sigma(F^2^) is used only for calculating R-factors(gt) etc. and is 
 not relevant to the choice of reflections for refinement.  R-factors based 
 on F^2^ are statistically about twice as large as those based on F, and R- 
 factors based on ALL data will be even larger. 
; 
  
_refine_ls_structure_factor_coef  Fsqd 
_refine_ls_matrix_type            full 
_refine_ls_weighting_scheme       calc 
_refine_ls_weighting_details 
 'calc w=1/[\s^2^(Fo^2^)+(0.0362P)^2^+1.2919P] where P=(Fo^2^+2Fc^2^)/3' 
_atom_sites_solution_primary      direct 
_atom_sites_solution_secondary    difmap 
_atom_sites_solution_hydrogens    geom 
_refine_ls_hydrogen_treatment     constr 
_refine_ls_extinction_method      none 
_refine_ls_extinction_coef        ? 
_refine_ls_number_reflns          12307 
_refine_ls_number_parameters      589 
_refine_ls_number_restraints      26 
_refine_ls_R_factor_all           0.0331 
_refine_ls_R_factor_gt            0.0278 
_refine_ls_wR_factor_ref          0.0672 
_refine_ls_wR_factor_gt           0.0651 
_refine_ls_goodness_of_fit_ref    1.054 
_refine_ls_restrained_S_all       1.054 
_refine_ls_shift/su_max           0.002 
_refine_ls_shift/su_mean          0.000 
  
loop_ 
 _atom_site_label 
 _atom_site_type_symbol 
 _atom_site_fract_x 
 _atom_site_fract_y 
 _atom_site_fract_z 
 _atom_site_U_iso_or_equiv 
 _atom_site_adp_type 
 _atom_site_occupancy 
 _atom_site_symmetry_multiplicity 
 _atom_site_calc_flag 
 _atom_site_refinement_flags 
 _atom_site_disorder_assembly 
 _atom_site_disorder_group 
C1 C 0.6365(3) 0.4745(2) 0.24191(13) 0.0160(5) Uani 1 1 d . . . 
C2 C 0.6658(3) 0.5193(2) 0.18439(14) 0.0172(6) Uani 1 1 d . . . 
C3 C 0.5834(3) 0.4403(2) 0.13156(14) 0.0169(5) Uani 1 1 d . . . 
H3 H 0.5845 0.4468 0.0877 0.020 Uiso 1 1 calc R . . 
C4 C 0.5005(3) 0.3517(2) 0.15300(13) 0.0157(5) Uani 1 1 d . . . 
C5 C 0.5366(3) 0.3714(2) 0.22089(14) 0.0159(5) Uani 1 1 d . . . 
H5 H 0.4998 0.3230 0.2488 0.019 Uiso 1 1 calc R . . 
C6 C 0.6714(3) 0.5250(2) 0.31306(14) 0.0178(6) Uani 1 1 d . . . 
C7 C 0.6018(3) 0.6179(3) 0.31583(15) 0.0232(6) Uani 1 1 d . . . 
H7A H 0.6117 0.6428 0.3611 0.035 Uiso 1 1 calc R . . 
H7B H 0.5059 0.5901 0.2935 0.035 Uiso 1 1 calc R . . 
H7C H 0.6439 0.6798 0.2947 0.035 Uiso 1 1 calc R . . 
C8 C 0.8228(3) 0.5677(2) 0.34557(14) 0.0198(6) Uani 1 1 d . . . 
H8A H 0.8638 0.5063 0.3476 0.030 Uiso 1 1 calc R . . 
H8B H 0.8364 0.6015 0.3895 0.030 Uiso 1 1 calc R . . 
H8C H 0.8652 0.6228 0.3204 0.030 Uiso 1 1 calc R . . 
C9 C 0.6135(3) 0.4382(2) 0.35457(14) 0.0223(6) Uani 1 1 d . . . 
H9A H 0.6460 0.3732 0.3499 0.033 Uiso 1 1 calc R . . 
H9B H 0.5148 0.4171 0.3402 0.033 Uiso 1 1 calc R . . 
H9C H 0.6429 0.4690 0.4000 0.033 Uiso 1 1 calc R . . 
C10 C 0.7273(3) 0.6370(2) 0.16828(14) 0.0194(6) Uani 1 1 d . . . 
C11 C 0.6098(3) 0.6909(3) 0.15022(17) 0.0291(7) Uani 1 1 d . . . 
H11A H 0.5703 0.6936 0.1869 0.044 Uiso 1 1 calc R . . 
H11B H 0.5408 0.6473 0.1128 0.044 Uiso 1 1 calc R . . 
H11C H 0.6440 0.7658 0.1396 0.044 Uiso 1 1 calc R . . 
C12 C 0.8406(3) 0.7151(2) 0.22131(15) 0.0226(6) Uani 1 1 d . . . 
H12A H 0.9157 0.6822 0.2344 0.034 Uiso 1 1 calc R . . 
H12B H 0.8064 0.7275 0.2587 0.034 Uiso 1 1 calc R . . 
H12C H 0.8720 0.7856 0.2046 0.034 Uiso 1 1 calc R . . 
C13 C 0.7847(4) 0.6332(3) 0.10912(15) 0.0283(7) Uani 1 1 d . . . 
H13A H 0.8175 0.7082 0.0983 0.042 Uiso 1 1 calc R . . 
H13B H 0.7138 0.5897 0.0723 0.042 Uiso 1 1 calc R . . 
H13C H 0.8594 0.5992 0.1191 0.042 Uiso 1 1 calc R . . 
C14 C 0.3808(3) 0.2640(2) 0.10994(14) 0.0183(6) Uani 1 1 d . . . 
C15 C 0.2759(3) 0.3214(3) 0.07675(15) 0.0244(6) Uani 1 1 d . . . 
H15A H 0.2466 0.3580 0.1096 0.037 Uiso 1 1 calc R . . 
H15B H 0.1981 0.2667 0.0486 0.037 Uiso 1 1 calc R . . 
H15C H 0.3159 0.3762 0.0509 0.037 Uiso 1 1 calc R . . 
C16 C 0.4235(3) 0.2061(3) 0.05818(16) 0.0277(7) Uani 1 1 d . . . 
H16A H 0.4664 0.2608 0.0330 0.041 Uiso 1 1 calc R . . 
H16B H 0.3440 0.1539 0.0294 0.041 Uiso 1 1 calc R . . 
H16C H 0.4876 0.1663 0.0788 0.041 Uiso 1 1 calc R . . 
C17 C 0.3156(3) 0.1777(3) 0.14956(15) 0.0237(6) Uani 1 1 d . . . 
H17A H 0.3831 0.1433 0.1731 0.035 Uiso 1 1 calc R . . 
H17B H 0.2413 0.1213 0.1205 0.035 Uiso 1 1 calc R . . 
H17C H 0.2809 0.2135 0.1805 0.035 Uiso 1 1 calc R . . 
C18 C 0.8527(3) 0.2805(2) 0.07565(13) 0.0156(5) Uani 1 1 d . . . 
C19 C 0.8849(3) 0.1983(2) 0.11634(13) 0.0156(5) Uani 1 1 d . . . 
C20 C 0.9821(3) 0.2564(2) 0.17362(13) 0.0142(5) Uani 1 1 d . . . 
H20 H 1.0203 0.2228 0.2096 0.017 Uiso 1 1 calc R . . 
C21 C 1.0133(3) 0.3709(2) 0.16900(13) 0.0151(5) Uani 1 1 d . . . 
C22 C 0.9306(3) 0.3852(2) 0.11027(13) 0.0169(5) Uani 1 1 d . . . 
H22 H 0.9267 0.4545 0.0954 0.020 Uiso 1 1 calc R . . 
C23 C 0.7909(3) 0.2783(3) 0.00177(13) 0.0195(6) Uani 1 1 d . . . 
C24 C 0.7384(3) 0.3800(3) -0.01247(14) 0.0234(6) Uani 1 1 d . . . 
H24A H 0.7011 0.3778 -0.0592 0.035 Uiso 1 1 calc R . . 
H24B H 0.8128 0.4470 0.0029 0.035 Uiso 1 1 calc R . . 
H24C H 0.6678 0.3798 0.0097 0.035 Uiso 1 1 calc R . . 
C25 C 0.9078(3) 0.2866(3) -0.03073(14) 0.0243(6) Uani 1 1 d . . . 
H25A H 0.9465 0.2248 -0.0209 0.036 Uiso 1 1 calc R . . 
H25B H 0.9775 0.3561 -0.0142 0.036 Uiso 1 1 calc R . . 
H25C H 0.8734 0.2843 -0.0777 0.036 Uiso 1 1 calc R . . 
C26 C 0.6749(3) 0.1780(3) -0.03202(14) 0.0237(6) Uani 1 1 d . . . 
H26A H 0.6015 0.1693 -0.0108 0.036 Uiso 1 1 calc R . . 
H26B H 0.7071 0.1118 -0.0294 0.036 Uiso 1 1 calc R . . 
H26C H 0.6420 0.1887 -0.0775 0.036 Uiso 1 1 calc R . . 
C27 C 0.8502(3) 0.0718(2) 0.10476(14) 0.0183(6) Uani 1 1 d . . . 
C28 C 0.9142(3) 0.0386(3) 0.05199(15) 0.0226(6) Uani 1 1 d . . . 
H28A H 0.8679 0.0563 0.0100 0.034 Uiso 1 1 calc R . . 
H28B H 0.9052 -0.0407 0.0500 0.034 Uiso 1 1 calc R . . 
H28C H 1.0099 0.0791 0.0626 0.034 Uiso 1 1 calc R . . 
C29 C 0.6985(3) 0.0125(2) 0.08654(15) 0.0218(6) Uani 1 1 d . . . 
H29A H 0.6588 0.0312 0.1208 0.033 Uiso 1 1 calc R . . 
H29B H 0.6856 -0.0673 0.0814 0.033 Uiso 1 1 calc R . . 
H29C H 0.6545 0.0357 0.0458 0.033 Uiso 1 1 calc R . . 
C30 C 0.9141(3) 0.0259(2) 0.16660(15) 0.0226(6) Uani 1 1 d . . . 
H30A H 1.0123 0.0564 0.1778 0.034 Uiso 1 1 calc R . . 
H30B H 0.8913 -0.0546 0.1591 0.034 Uiso 1 1 calc R . . 
H30C H 0.8793 0.0467 0.2022 0.034 Uiso 1 1 calc R . . 
C31 C 1.1099(3) 0.4626(2) 0.21954(13) 0.0164(5) Uani 1 1 d . . . 
C32 C 1.1689(3) 0.5635(2) 0.18781(15) 0.0244(6) Uani 1 1 d . . . 
H32A H 1.2184 0.5427 0.1584 0.037 Uiso 1 1 calc R . . 
H32B H 1.2305 0.6210 0.2213 0.037 Uiso 1 1 calc R . . 
H32C H 1.0958 0.5913 0.1634 0.037 Uiso 1 1 calc R . . 
C33 C 1.2255(3) 0.4232(3) 0.26016(14) 0.0213(6) Uani 1 1 d . . . 
H33A H 1.1884 0.3569 0.2793 0.032 Uiso 1 1 calc R . . 
H33B H 1.2816 0.4812 0.2946 0.032 Uiso 1 1 calc R . . 
H33C H 1.2805 0.4062 0.2325 0.032 Uiso 1 1 calc R . . 
C34 C 1.0301(3) 0.4963(2) 0.26426(14) 0.0201(6) Uani 1 1 d . . . 
H34A H 0.9555 0.5211 0.2386 0.030 Uiso 1 1 calc R . . 
H34B H 1.0898 0.5562 0.2967 0.030 Uiso 1 1 calc R . . 
H34C H 0.9941 0.4329 0.2860 0.030 Uiso 1 1 calc R . . 
C35 C 0.9652(3) 0.3506(2) 0.40888(15) 0.0235(6) Uani 1 1 d . . . 
H35 H 0.8891 0.3774 0.4081 0.028 Uiso 1 1 calc R . . 
C36 C 1.0795(3) 0.3880(3) 0.45997(15) 0.0282(7) Uani 1 1 d . . . 
H36 H 1.0806 0.4395 0.4937 0.034 Uiso 1 1 calc R . . 
C37 C 1.1919(4) 0.3508(3) 0.46227(16) 0.0308(7) Uani 1 1 d . . . 
H37 H 1.2706 0.3772 0.4970 0.037 Uiso 1 1 calc R . . 
C38 C 1.1883(3) 0.2745(3) 0.41317(15) 0.0269(7) Uani 1 1 d . . . 
H38 H 1.2647 0.2479 0.4143 0.032 Uiso 1 1 calc R . . 
C39 C 1.0729(3) 0.2370(3) 0.36222(15) 0.0220(6) Uani 1 1 d . . . 
H39 H 1.0717 0.1843 0.3290 0.026 Uiso 1 1 calc R . . 
C40 C 0.9592(3) 0.2743(2) 0.35853(13) 0.0170(5) Uani 1 1 d . . . 
C41 C 0.8374(3) 0.2338(2) 0.30267(13) 0.0163(5) Uani 1 1 d . . . 
C42 C 0.7640(3) 0.1290(2) 0.30112(13) 0.0154(5) Uani 1 1 d . . . 
C43 C 0.7902(3) 0.0533(2) 0.35267(14) 0.0171(5) Uani 1 1 d . . . 
C44 C 0.7936(3) 0.0830(3) 0.41642(15) 0.0223(6) Uani 1 1 d . . . 
H44 H 0.7759 0.1504 0.4273 0.027 Uiso 1 1 calc R . . 
C45 C 0.8224(3) 0.0155(3) 0.46407(16) 0.0276(7) Uani 1 1 d . . . 
H45 H 0.8256 0.0373 0.5075 0.033 Uiso 1 1 calc R . . 
C46 C 0.8465(3) -0.0837(3) 0.44896(16) 0.0268(7) Uani 1 1 d . . . 
H46 H 0.8659 -0.1301 0.4818 0.032 Uiso 1 1 calc R . . 
C47 C 0.8423(3) -0.1148(3) 0.38594(17) 0.0269(7) Uani 1 1 d . . . 
H47 H 0.8593 -0.1826 0.3753 0.032 Uiso 1 1 calc R . . 
C48 C 0.8130(3) -0.0469(2) 0.33762(15) 0.0208(6) Uani 1 1 d . . . 
H48 H 0.8086 -0.0695 0.2942 0.025 Uiso 1 1 calc R . . 
C49 C 0.6447(3) 0.0770(2) 0.24402(13) 0.0170(5) Uani 1 1 d . . . 
H49 H 0.6613 0.0106 0.2243 0.020 Uiso 1 1 calc R . . 
C50 C 0.5122(3) 0.0412(2) 0.26258(14) 0.0171(5) Uani 1 1 d . . . 
C51 C 0.4848(3) 0.1043(2) 0.30953(15) 0.0209(6) Uani 1 1 d . . . 
H51 H 0.5516 0.1689 0.3315 0.025 Uiso 1 1 calc R . . 
C52 C 0.3620(3) 0.0747(3) 0.32492(15) 0.0236(6) Uani 1 1 d . . . 
H52 H 0.3442 0.1185 0.3570 0.028 Uiso 1 1 calc R . . 
C53 C 0.2658(3) -0.0194(3) 0.29297(15) 0.0232(6) Uani 1 1 d . . . 
C54 C 0.2893(3) -0.0843(3) 0.24576(15) 0.0254(7) Uani 1 1 d . . . 
H54 H 0.2218 -0.1484 0.2237 0.031 Uiso 1 1 calc R . . 
C55 C 0.4136(3) -0.0536(3) 0.23124(15) 0.0235(6) Uani 1 1 d . . . 
H55 H 0.4315 -0.0981 0.1995 0.028 Uiso 1 1 calc R . . 
C56 C 0.2247(7) 0.7061(6) 0.4251(3) 0.0325(15) Uiso 0.50 1 d PU A 1 
H56A H 0.1422 0.6465 0.4045 0.039 Uiso 0.50 1 calc PR A 1 
H56B H 0.1968 0.7709 0.4380 0.039 Uiso 0.50 1 calc PR A 1 
C57 C 0.3049(9) 0.6681(8) 0.4851(4) 0.0333(19) Uiso 0.50 1 d PU A 1 
H57A H 0.2484 0.6488 0.5158 0.040 Uiso 0.50 1 calc PR A 1 
H57B H 0.3293 0.6014 0.4725 0.040 Uiso 0.50 1 calc PR A 1 
C58 C 0.4318(7) 0.7580(6) 0.5178(3) 0.0238(13) Uiso 0.50 1 d PU A 1 
H58A H 0.4077 0.8232 0.5330 0.029 Uiso 0.50 1 calc PR A 1 
H58B H 0.4840 0.7314 0.5558 0.029 Uiso 0.50 1 calc PR A 1 
C59 C 0.5166(7) 0.7894(6) 0.4703(3) 0.0331(15) Uiso 0.50 1 d PU A 1 
H59A H 0.5981 0.8497 0.4913 0.040 Uiso 0.50 1 calc PR A 1 
H59B H 0.5462 0.7253 0.4579 0.040 Uiso 0.50 1 calc PR A 1 
C60 C 0.4395(13) 0.8259(11) 0.4110(6) 0.053(3) Uiso 0.50 1 d PU A 1 
H60A H 0.4962 0.8425 0.3802 0.064 Uiso 0.50 1 calc PR A 1 
H60B H 0.4175 0.8942 0.4228 0.064 Uiso 0.50 1 calc PR A 1 
C61 C 0.3069(10) 0.7357(8) 0.3778(5) 0.042(2) Uiso 0.50 1 d PU A 1 
H61A H 0.2551 0.7634 0.3403 0.050 Uiso 0.50 1 calc PR A 1 
H61B H 0.3286 0.6696 0.3620 0.050 Uiso 0.50 1 calc PR A 1 
C56' C 0.3224(11) 0.6494(9) 0.4205(5) 0.059(2) Uiso 0.50 1 d PU B 2 
H56C H 0.4001 0.6179 0.4325 0.071 Uiso 0.50 1 calc PR B 2 
H56D H 0.2409 0.5886 0.4002 0.071 Uiso 0.50 1 calc PR B 2 
C57' C 0.3034(12) 0.7040(10) 0.4814(6) 0.057(3) Uiso 0.50 1 d PU B 2 
H57C H 0.2935 0.6506 0.5137 0.069 Uiso 0.50 1 calc PR B 2 
H57D H 0.2217 0.7306 0.4706 0.069 Uiso 0.50 1 calc PR B 2 
C58' C 0.4341(12) 0.8045(10) 0.5094(6) 0.065(3) Uiso 0.50 1 d PU B 2 
H58C H 0.4233 0.8447 0.5475 0.078 Uiso 0.50 1 calc PR B 2 
H58D H 0.5138 0.7761 0.5237 0.078 Uiso 0.50 1 calc PR B 2 
C59' C 0.4566(12) 0.8822(10) 0.4594(5) 0.069(3) Uiso 0.50 1 d PU B 2 
H59C H 0.3819 0.9172 0.4490 0.083 Uiso 0.50 1 calc PR B 2 
H59D H 0.5415 0.9410 0.4772 0.083 Uiso 0.50 1 calc PR B 2 
C60' C 0.4644(12) 0.8261(9) 0.4006(5) 0.041(3) Uiso 0.50 1 d PU B 2 
H60C H 0.5464 0.7998 0.4100 0.050 Uiso 0.50 1 calc PR B 2 
H60D H 0.4731 0.8794 0.3681 0.050 Uiso 0.50 1 calc PR B 2 
C61' C 0.3466(9) 0.7322(7) 0.3730(4) 0.036(2) Uiso 0.50 1 d PU B 2 
H61C H 0.3601 0.6956 0.3344 0.043 Uiso 0.50 1 calc PR B 2 
H61D H 0.2658 0.7594 0.3588 0.043 Uiso 0.50 1 calc PR B 2 
Cl1 Cl 0.11320(8) -0.05759(7) 0.31408(4) 0.03407(19) Uani 1 1 d . . . 
O1 O 0.63663(19) 0.15329(16) 0.19719(9) 0.0171(4) Uani 1 1 d . . . 
Th1 Th 0.757697(10) 0.313966(8) 0.193256(5) 0.01331(4) Uani 1 1 d . . . 
  
loop_ 
 _atom_site_aniso_label 
 _atom_site_aniso_U_11 
 _atom_site_aniso_U_22 
 _atom_site_aniso_U_33 
 _atom_site_aniso_U_23 
 _atom_site_aniso_U_13 
 _atom_site_aniso_U_12 
C1 0.0142(13) 0.0181(13) 0.0164(13) -0.0003(11) 0.0038(10) 0.0062(11) 
C2 0.0155(13) 0.0175(13) 0.0194(14) 0.0027(11) 0.0048(11) 0.0053(11) 
C3 0.0142(13) 0.0221(14) 0.0152(13) 0.0023(11) 0.0024(10) 0.0075(11) 
C4 0.0134(13) 0.0178(13) 0.0170(13) -0.0007(11) 0.0040(10) 0.0066(11) 
C5 0.0143(13) 0.0158(13) 0.0187(14) 0.0003(11) 0.0055(10) 0.0049(11) 
C6 0.0185(14) 0.0169(13) 0.0177(14) -0.0030(11) 0.0050(11) 0.0049(11) 
C7 0.0187(14) 0.0221(15) 0.0287(16) -0.0054(12) 0.0082(12) 0.0048(12) 
C8 0.0197(14) 0.0221(14) 0.0171(14) -0.0006(11) 0.0034(11) 0.0066(12) 
C9 0.0251(15) 0.0219(15) 0.0188(14) -0.0031(12) 0.0084(12) 0.0025(12) 
C10 0.0203(14) 0.0143(13) 0.0226(15) 0.0038(11) 0.0037(11) 0.0045(11) 
C11 0.0272(17) 0.0207(15) 0.0371(19) 0.0073(14) 0.0019(14) 0.0082(13) 
C12 0.0241(15) 0.0150(14) 0.0274(16) 0.0032(12) 0.0055(12) 0.0040(12) 
C13 0.0364(19) 0.0228(16) 0.0251(16) 0.0055(13) 0.0111(14) 0.0036(14) 
C14 0.0136(13) 0.0215(14) 0.0192(14) -0.0011(11) 0.0030(11) 0.0052(11) 
C15 0.0166(14) 0.0313(17) 0.0235(15) 0.0013(13) 0.0009(12) 0.0078(13) 
C16 0.0199(15) 0.0320(17) 0.0278(17) -0.0106(14) 0.0044(13) 0.0052(13) 
C17 0.0161(14) 0.0234(15) 0.0262(16) 0.0000(12) 0.0015(12) 0.0003(12) 
C18 0.0140(13) 0.0198(14) 0.0128(13) 0.0013(10) 0.0050(10) 0.0030(11) 
C19 0.0137(13) 0.0171(13) 0.0157(13) 0.0003(11) 0.0063(10) 0.0017(10) 
C20 0.0122(12) 0.0194(13) 0.0131(13) 0.0036(10) 0.0053(10) 0.0060(10) 
C21 0.0134(13) 0.0176(13) 0.0144(13) -0.0006(10) 0.0060(10) 0.0026(10) 
C22 0.0172(13) 0.0176(13) 0.0173(13) 0.0031(11) 0.0064(11) 0.0054(11) 
C23 0.0196(14) 0.0269(15) 0.0118(13) 0.0018(11) 0.0044(11) 0.0057(12) 
C24 0.0231(15) 0.0302(16) 0.0156(14) 0.0027(12) 0.0019(11) 0.0078(13) 
C25 0.0231(15) 0.0341(17) 0.0176(14) 0.0066(13) 0.0099(12) 0.0061(13) 
C26 0.0207(15) 0.0310(17) 0.0177(14) -0.0021(12) 0.0055(12) 0.0044(13) 
C27 0.0210(14) 0.0168(14) 0.0176(14) -0.0034(11) 0.0087(11) 0.0034(11) 
C28 0.0246(15) 0.0210(15) 0.0233(15) -0.0028(12) 0.0100(12) 0.0052(12) 
C29 0.0248(15) 0.0175(14) 0.0226(15) -0.0022(11) 0.0124(12) -0.0005(12) 
C30 0.0291(16) 0.0150(14) 0.0246(16) 0.0025(11) 0.0089(13) 0.0055(12) 
C31 0.0137(13) 0.0163(13) 0.0172(13) -0.0003(11) 0.0037(10) 0.0011(10) 
C32 0.0241(16) 0.0195(15) 0.0253(16) 0.0026(12) 0.0075(13) -0.0024(12) 
C33 0.0155(14) 0.0246(15) 0.0203(15) -0.0044(12) 0.0006(11) 0.0041(12) 
C34 0.0178(14) 0.0193(14) 0.0217(15) -0.0009(11) 0.0046(11) 0.0036(11) 
C35 0.0279(16) 0.0199(14) 0.0226(15) 0.0005(12) 0.0034(12) 0.0096(13) 
C36 0.0365(18) 0.0248(16) 0.0203(15) -0.0016(12) -0.0003(13) 0.0110(14) 
C37 0.0301(18) 0.0323(18) 0.0225(16) -0.0022(14) -0.0061(13) 0.0083(14) 
C38 0.0236(16) 0.0321(17) 0.0248(16) 0.0023(13) 0.0034(13) 0.0100(14) 
C39 0.0196(15) 0.0251(15) 0.0207(15) 0.0004(12) 0.0060(12) 0.0047(12) 
C40 0.0196(14) 0.0150(13) 0.0159(13) 0.0040(10) 0.0053(11) 0.0029(11) 
C41 0.0159(13) 0.0208(14) 0.0135(13) 0.0024(11) 0.0054(10) 0.0058(11) 
C42 0.0163(13) 0.0159(13) 0.0167(13) 0.0019(10) 0.0073(11) 0.0066(11) 
C43 0.0129(13) 0.0163(13) 0.0208(14) 0.0029(11) 0.0054(11) 0.0007(10) 
C44 0.0213(15) 0.0212(15) 0.0241(15) 0.0045(12) 0.0086(12) 0.0021(12) 
C45 0.0225(16) 0.0342(18) 0.0235(16) 0.0041(13) 0.0060(13) 0.0034(13) 
C46 0.0201(15) 0.0268(16) 0.0301(17) 0.0126(14) 0.0033(13) 0.0021(13) 
C47 0.0200(15) 0.0194(15) 0.0383(19) 0.0058(13) 0.0049(13) 0.0023(12) 
C48 0.0185(14) 0.0190(14) 0.0252(15) 0.0027(12) 0.0075(12) 0.0036(11) 
C49 0.0182(14) 0.0152(13) 0.0172(13) 0.0006(10) 0.0063(11) 0.0026(11) 
C50 0.0177(14) 0.0169(13) 0.0171(13) 0.0026(11) 0.0058(11) 0.0042(11) 
C51 0.0174(14) 0.0185(14) 0.0242(15) -0.0027(12) 0.0054(12) 0.0010(11) 
C52 0.0190(15) 0.0250(15) 0.0282(16) -0.0024(13) 0.0103(12) 0.0056(12) 
C53 0.0154(14) 0.0256(16) 0.0288(16) 0.0066(13) 0.0078(12) 0.0033(12) 
C54 0.0202(15) 0.0238(16) 0.0259(16) -0.0019(13) 0.0034(12) -0.0020(12) 
C55 0.0264(16) 0.0194(14) 0.0230(15) -0.0012(12) 0.0079(12) 0.0023(12) 
Cl1 0.0176(4) 0.0406(5) 0.0437(5) 0.0052(4) 0.0137(3) 0.0019(3) 
O1 0.0171(10) 0.0169(10) 0.0163(10) 0.0010(8) 0.0046(8) 0.0029(8) 
Th1 0.01177(5) 0.01441(5) 0.01386(5) 0.00031(3) 0.00419(3) 0.00312(4) 
  
_geom_special_details 
; 
 All esds (except the esd in the dihedral angle between two l.s. planes) 
 are estimated using the full covariance matrix.  The cell esds are taken 
 into account individually in the estimation of esds in distances, angles 
 and torsion angles; correlations between esds in cell parameters are only 
 used when they are defined by crystal symmetry.  An approximate (isotropic) 
 treatment of cell esds is used for estimating esds involving l.s. planes. 
; 
  
loop_ 
 _geom_bond_atom_site_label_1 
 _geom_bond_atom_site_label_2 
 _geom_bond_distance 
 _geom_bond_site_symmetry_2 
 _geom_bond_publ_flag 
C1 C5 1.428(4) . ? 
C1 C2 1.444(4) . ? 
C1 C6 1.550(4) . ? 
C1 Th1 2.948(3) . ? 
C2 C3 1.425(4) . ? 
C2 C10 1.551(4) . ? 
C2 Th1 2.995(3) . ? 
C3 C4 1.403(4) . ? 
C3 Th1 2.868(3) . ? 
C3 H3 0.9500 . ? 
C4 C5 1.407(4) . ? 
C4 C14 1.526(4) . ? 
C4 Th1 2.829(3) . ? 
C5 Th1 2.813(3) . ? 
C5 H5 0.9500 . ? 
C6 C8 1.533(4) . ? 
C6 C9 1.537(4) . ? 
C6 C7 1.546(4) . ? 
C7 H7A 0.9800 . ? 
C7 H7B 0.9800 . ? 
C7 H7C 0.9800 . ? 
C8 H8A 0.9800 . ? 
C8 H8B 0.9800 . ? 
C8 H8C 0.9800 . ? 
C9 H9A 0.9800 . ? 
C9 H9B 0.9800 . ? 
C9 H9C 0.9800 . ? 
C10 C12 1.536(4) . ? 
C10 C13 1.538(4) . ? 
C10 C11 1.548(4) . ? 
C11 H11A 0.9800 . ? 
C11 H11B 0.9800 . ? 
C11 H11C 0.9800 . ? 
C12 H12A 0.9800 . ? 
C12 H12B 0.9800 . ? 
C12 H12C 0.9800 . ? 
C13 H13A 0.9800 . ? 
C13 H13B 0.9800 . ? 
C13 H13C 0.9800 . ? 
C14 C16 1.525(4) . ? 
C14 C15 1.532(4) . ? 
C14 C17 1.534(4) . ? 
C15 H15A 0.9800 . ? 
C15 H15B 0.9800 . ? 
C15 H15C 0.9800 . ? 
C16 H16A 0.9800 . ? 
C16 H16B 0.9800 . ? 
C16 H16C 0.9800 . ? 
C17 H17A 0.9800 . ? 
C17 H17B 0.9800 . ? 
C17 H17C 0.9800 . ? 
C18 C22 1.433(4) . ? 
C18 C19 1.436(4) . ? 
C18 C23 1.557(4) . ? 
C18 Th1 2.986(3) . ? 
C19 C20 1.429(4) . ? 
C19 C27 1.541(4) . ? 
C19 Th1 2.930(3) . ? 
C20 C21 1.411(4) . ? 
C20 Th1 2.783(3) . ? 
C20 H20 0.9500 . ? 
C21 C22 1.398(4) . ? 
C21 C31 1.525(4) . ? 
C21 Th1 2.805(3) . ? 
C22 Th1 2.863(3) . ? 
C22 H22 0.9500 . ? 
C23 C26 1.532(4) . ? 
C23 C24 1.540(4) . ? 
C23 C25 1.548(4) . ? 
C24 H24A 0.9800 . ? 
C24 H24B 0.9800 . ? 
C24 H24C 0.9800 . ? 
C25 H25A 0.9800 . ? 
C25 H25B 0.9800 . ? 
C25 H25C 0.9800 . ? 
C26 H26A 0.9800 . ? 
C26 H26B 0.9800 . ? 
C26 H26C 0.9800 . ? 
C27 C29 1.538(4) . ? 
C27 C30 1.543(4) . ? 
C27 C28 1.549(4) . ? 
C28 H28A 0.9800 . ? 
C28 H28B 0.9800 . ? 
C28 H28C 0.9800 . ? 
C29 H29A 0.9800 . ? 
C29 H29B 0.9800 . ? 
C29 H29C 0.9800 . ? 
C30 H30A 0.9800 . ? 
C30 H30B 0.9800 . ? 
C30 H30C 0.9800 . ? 
C31 C32 1.531(4) . ? 
C31 C33 1.532(4) . ? 
C31 C34 1.538(4) . ? 
C32 H32A 0.9800 . ? 
C32 H32B 0.9800 . ? 
C32 H32C 0.9800 . ? 
C33 H33A 0.9800 . ? 
C33 H33B 0.9800 . ? 
C33 H33C 0.9800 . ? 
C34 H34A 0.9800 . ? 
C34 H34B 0.9800 . ? 
C34 H34C 0.9800 . ? 
C35 C36 1.386(4) . ? 
C35 C40 1.398(4) . ? 
C35 H35 0.9500 . ? 
C36 C37 1.382(5) . ? 
C36 H36 0.9500 . ? 
C37 C38 1.387(5) . ? 
C37 H37 0.9500 . ? 
C38 C39 1.392(4) . ? 
C38 H38 0.9500 . ? 
C39 C40 1.393(4) . ? 
C39 H39 0.9500 . ? 
C40 C41 1.495(4) . ? 
C41 C42 1.348(4) . ? 
C41 Th1 2.627(3) . ? 
C42 C43 1.511(4) . ? 
C42 C49 1.516(4) . ? 
C43 C48 1.389(4) . ? 
C43 C44 1.393(4) . ? 
C44 C45 1.383(4) . ? 
C44 H44 0.9500 . ? 
C45 C46 1.385(5) . ? 
C45 H45 0.9500 . ? 
C46 C47 1.379(5) . ? 
C46 H46 0.9500 . ? 
C47 C48 1.397(4) . ? 
C47 H47 0.9500 . ? 
C48 H48 0.9500 . ? 
C49 O1 1.420(3) . ? 
C49 C50 1.517(4) . ? 
C49 H49 1.0000 . ? 
C50 C51 1.390(4) . ? 
C50 C55 1.392(4) . ? 
C51 C52 1.386(4) . ? 
C51 H51 0.9500 . ? 
C52 C53 1.380(4) . ? 
C52 H52 0.9500 . ? 
C53 C54 1.386(4) . ? 
C53 Cl1 1.742(3) . ? 
C54 C55 1.392(4) . ? 
C54 H54 0.9500 . ? 
C55 H55 0.9500 . ? 
C56 C61 1.489(12) . ? 
C56 C57 1.530(11) . ? 
C56 H56A 0.9900 . ? 
C56 H56B 0.9900 . ? 
C57 C58 1.515(11) . ? 
C57 H57A 0.9900 . ? 
C57 H57B 0.9900 . ? 
C58 C59 1.515(10) . ? 
C58 H58A 0.9900 . ? 
C58 H58B 0.9900 . ? 
C59 C60 1.496(15) . ? 
C59 H59A 0.9900 . ? 
C59 H59B 0.9900 . ? 
C60 C61 1.555(16) . ? 
C60 H60A 0.9900 . ? 
C60 H60B 0.9900 . ? 
C61 H61A 0.9900 . ? 
C61 H61B 0.9900 . ? 
C56' C61' 1.506(13) . ? 
C56' C57' 1.533(15) . ? 
C56' H56C 0.9900 . ? 
C56' H56D 0.9900 . ? 
C57' C58' 1.593(16) . ? 
C57' H57C 0.9900 . ? 
C57' H57D 0.9900 . ? 
C58' C59' 1.500(16) . ? 
C58' H58C 0.9900 . ? 
C58' H58D 0.9900 . ? 
C59' C60' 1.453(16) . ? 
C59' H59C 0.9900 . ? 
C59' H59D 0.9900 . ? 
C60' C61' 1.466(14) . ? 
C60' H60C 0.9900 . ? 
C60' H60D 0.9900 . ? 
C61' H61C 0.9900 . ? 
C61' H61D 0.9900 . ? 
O1 Th1 2.1230(19) . ? 
  
loop_ 
 _geom_angle_atom_site_label_1 
 _geom_angle_atom_site_label_2 
 _geom_angle_atom_site_label_3 
 _geom_angle 
 _geom_angle_site_symmetry_1 
 _geom_angle_site_symmetry_3 
 _geom_angle_publ_flag 
C5 C1 C2 106.6(2) . . ? 
C5 C1 C6 119.7(2) . . ? 
C2 C1 C6 132.6(3) . . ? 
C5 C1 Th1 70.45(15) . . ? 
C2 C1 Th1 77.77(16) . . ? 
C6 C1 Th1 125.65(18) . . ? 
C3 C2 C1 106.0(2) . . ? 
C3 C2 C10 117.1(2) . . ? 
C1 C2 C10 134.0(3) . . ? 
C3 C2 Th1 71.01(15) . . ? 
C1 C2 Th1 74.12(15) . . ? 
C10 C2 Th1 133.79(18) . . ? 
C4 C3 C2 111.0(2) . . ? 
C4 C3 Th1 74.20(16) . . ? 
C2 C3 Th1 80.96(16) . . ? 
C4 C3 H3 124.5 . . ? 
C2 C3 H3 124.5 . . ? 
Th1 C3 H3 112.3 . . ? 
C3 C4 C5 105.9(2) . . ? 
C3 C4 C14 125.6(3) . . ? 
C5 C4 C14 127.7(3) . . ? 
C3 C4 Th1 77.29(16) . . ? 
C5 C4 Th1 74.92(15) . . ? 
C14 C4 Th1 121.12(17) . . ? 
C4 C5 C1 110.4(3) . . ? 
C4 C5 Th1 76.19(15) . . ? 
C1 C5 Th1 80.97(16) . . ? 
C4 C5 H5 124.8 . . ? 
C1 C5 H5 124.8 . . ? 
Th1 C5 H5 110.3 . . ? 
C8 C6 C9 106.1(2) . . ? 
C8 C6 C7 110.4(2) . . ? 
C9 C6 C7 106.4(2) . . ? 
C8 C6 C1 114.5(2) . . ? 
C9 C6 C1 110.2(2) . . ? 
C7 C6 C1 108.8(2) . . ? 
C6 C7 H7A 109.5 . . ? 
C6 C7 H7B 109.5 . . ? 
H7A C7 H7B 109.5 . . ? 
C6 C7 H7C 109.5 . . ? 
H7A C7 H7C 109.5 . . ? 
H7B C7 H7C 109.5 . . ? 
C6 C8 H8A 109.5 . . ? 
C6 C8 H8B 109.5 . . ? 
H8A C8 H8B 109.5 . . ? 
C6 C8 H8C 109.5 . . ? 
H8A C8 H8C 109.5 . . ? 
H8B C8 H8C 109.5 . . ? 
C6 C9 H9A 109.5 . . ? 
C6 C9 H9B 109.5 . . ? 
H9A C9 H9B 109.5 . . ? 
C6 C9 H9C 109.5 . . ? 
H9A C9 H9C 109.5 . . ? 
H9B C9 H9C 109.5 . . ? 
C12 C10 C13 105.8(2) . . ? 
C12 C10 C11 107.7(2) . . ? 
C13 C10 C11 107.6(3) . . ? 
C12 C10 C2 117.7(2) . . ? 
C13 C10 C2 111.2(2) . . ? 
C11 C10 C2 106.5(2) . . ? 
C10 C11 H11A 109.5 . . ? 
C10 C11 H11B 109.5 . . ? 
H11A C11 H11B 109.5 . . ? 
C10 C11 H11C 109.5 . . ? 
H11A C11 H11C 109.5 . . ? 
H11B C11 H11C 109.5 . . ? 
C10 C12 H12A 109.5 . . ? 
C10 C12 H12B 109.5 . . ? 
H12A C12 H12B 109.5 . . ? 
C10 C12 H12C 109.5 . . ? 
H12A C12 H12C 109.5 . . ? 
H12B C12 H12C 109.5 . . ? 
C10 C13 H13A 109.5 . . ? 
C10 C13 H13B 109.5 . . ? 
H13A C13 H13B 109.5 . . ? 
C10 C13 H13C 109.5 . . ? 
H13A C13 H13C 109.5 . . ? 
H13B C13 H13C 109.5 . . ? 
C16 C14 C4 111.0(2) . . ? 
C16 C14 C15 108.8(3) . . ? 
C4 C14 C15 108.0(2) . . ? 
C16 C14 C17 109.0(3) . . ? 
C4 C14 C17 111.4(2) . . ? 
C15 C14 C17 108.6(2) . . ? 
C14 C15 H15A 109.5 . . ? 
C14 C15 H15B 109.5 . . ? 
H15A C15 H15B 109.5 . . ? 
C14 C15 H15C 109.5 . . ? 
H15A C15 H15C 109.5 . . ? 
H15B C15 H15C 109.5 . . ? 
C14 C16 H16A 109.5 . . ? 
C14 C16 H16B 109.5 . . ? 
H16A C16 H16B 109.5 . . ? 
C14 C16 H16C 109.5 . . ? 
H16A C16 H16C 109.5 . . ? 
H16B C16 H16C 109.5 . . ? 
C14 C17 H17A 109.5 . . ? 
C14 C17 H17B 109.5 . . ? 
H17A C17 H17B 109.5 . . ? 
C14 C17 H17C 109.5 . . ? 
H17A C17 H17C 109.5 . . ? 
H17B C17 H17C 109.5 . . ? 
C22 C18 C19 106.6(2) . . ? 
C22 C18 C23 117.0(2) . . ? 
C19 C18 C23 133.6(3) . . ? 
C22 C18 Th1 71.10(15) . . ? 
C19 C18 Th1 73.81(15) . . ? 
C23 C18 Th1 134.06(18) . . ? 
C20 C19 C18 106.4(2) . . ? 
C20 C19 C27 120.4(2) . . ? 
C18 C19 C27 132.7(2) . . ? 
C20 C19 Th1 69.86(15) . . ? 
C18 C19 Th1 78.12(16) . . ? 
C27 C19 Th1 123.35(17) . . ? 
C21 C20 C19 110.2(2) . . ? 
C21 C20 Th1 76.25(15) . . ? 
C19 C20 Th1 81.31(16) . . ? 
C21 C20 H20 124.9 . . ? 
C19 C20 H20 124.9 . . ? 
Th1 C20 H20 109.9 . . ? 
C22 C21 C20 106.4(2) . . ? 
C22 C21 C31 126.0(3) . . ? 
C20 C21 C31 127.5(2) . . ? 
C22 C21 Th1 78.04(16) . . ? 
C20 C21 Th1 74.51(15) . . ? 
C31 C21 Th1 110.13(17) . . ? 
C21 C22 C18 110.3(2) . . ? 
C21 C22 Th1 73.43(16) . . ? 
C18 C22 Th1 80.64(16) . . ? 
C21 C22 H22 124.8 . . ? 
C18 C22 H22 124.8 . . ? 
Th1 C22 H22 113.1 . . ? 
C26 C23 C24 106.3(2) . . ? 
C26 C23 C25 108.3(2) . . ? 
C24 C23 C25 107.3(2) . . ? 
C26 C23 C18 117.6(2) . . ? 
C24 C23 C18 110.6(2) . . ? 
C25 C23 C18 106.4(2) . . ? 
C23 C24 H24A 109.5 . . ? 
C23 C24 H24B 109.5 . . ? 
H24A C24 H24B 109.5 . . ? 
C23 C24 H24C 109.5 . . ? 
H24A C24 H24C 109.5 . . ? 
H24B C24 H24C 109.5 . . ? 
C23 C25 H25A 109.5 . . ? 
C23 C25 H25B 109.5 . . ? 
H25A C25 H25B 109.5 . . ? 
C23 C25 H25C 109.5 . . ? 
H25A C25 H25C 109.5 . . ? 
H25B C25 H25C 109.5 . . ? 
C23 C26 H26A 109.5 . . ? 
C23 C26 H26B 109.5 . . ? 
H26A C26 H26B 109.5 . . ? 
C23 C26 H26C 109.5 . . ? 
H26A C26 H26C 109.5 . . ? 
H26B C26 H26C 109.5 . . ? 
C29 C27 C19 114.8(2) . . ? 
C29 C27 C30 106.6(2) . . ? 
C19 C27 C30 109.8(2) . . ? 
C29 C27 C28 109.5(2) . . ? 
C19 C27 C28 109.8(2) . . ? 
C30 C27 C28 105.9(2) . . ? 
C27 C28 H28A 109.5 . . ? 
C27 C28 H28B 109.5 . . ? 
H28A C28 H28B 109.5 . . ? 
C27 C28 H28C 109.5 . . ? 
H28A C28 H28C 109.5 . . ? 
H28B C28 H28C 109.5 . . ? 
C27 C29 H29A 109.5 . . ? 
C27 C29 H29B 109.5 . . ? 
H29A C29 H29B 109.5 . . ? 
C27 C29 H29C 109.5 . . ? 
H29A C29 H29C 109.5 . . ? 
H29B C29 H29C 109.5 . . ? 
C27 C30 H30A 109.5 . . ? 
C27 C30 H30B 109.5 . . ? 
H30A C30 H30B 109.5 . . ? 
C27 C30 H30C 109.5 . . ? 
H30A C30 H30C 109.5 . . ? 
H30B C30 H30C 109.5 . . ? 
C21 C31 C32 111.2(2) . . ? 
C21 C31 C33 111.0(2) . . ? 
C32 C31 C33 109.0(2) . . ? 
C21 C31 C34 108.0(2) . . ? 
C32 C31 C34 108.6(2) . . ? 
C33 C31 C34 108.9(2) . . ? 
C31 C32 H32A 109.5 . . ? 
C31 C32 H32B 109.5 . . ? 
H32A C32 H32B 109.5 . . ? 
C31 C32 H32C 109.5 . . ? 
H32A C32 H32C 109.5 . . ? 
H32B C32 H32C 109.5 . . ? 
C31 C33 H33A 109.5 . . ? 
C31 C33 H33B 109.5 . . ? 
H33A C33 H33B 109.5 . . ? 
C31 C33 H33C 109.5 . . ? 
H33A C33 H33C 109.5 . . ? 
H33B C33 H33C 109.5 . . ? 
C31 C34 H34A 109.5 . . ? 
C31 C34 H34B 109.5 . . ? 
H34A C34 H34B 109.5 . . ? 
C31 C34 H34C 109.5 . . ? 
H34A C34 H34C 109.5 . . ? 
H34B C34 H34C 109.5 . . ? 
C36 C35 C40 121.5(3) . . ? 
C36 C35 H35 119.2 . . ? 
C40 C35 H35 119.2 . . ? 
C37 C36 C35 120.5(3) . . ? 
C37 C36 H36 119.7 . . ? 
C35 C36 H36 119.7 . . ? 
C36 C37 C38 119.1(3) . . ? 
C36 C37 H37 120.4 . . ? 
C38 C37 H37 120.4 . . ? 
C37 C38 C39 120.0(3) . . ? 
C37 C38 H38 120.0 . . ? 
C39 C38 H38 120.0 . . ? 
C38 C39 C40 121.8(3) . . ? 
C38 C39 H39 119.1 . . ? 
C40 C39 H39 119.1 . . ? 
C39 C40 C35 117.0(3) . . ? 
C39 C40 C41 120.7(3) . . ? 
C35 C40 C41 122.4(3) . . ? 
C42 C41 C40 116.1(2) . . ? 
C42 C41 Th1 110.71(19) . . ? 
C40 C41 Th1 132.10(19) . . ? 
C41 C42 C43 125.4(3) . . ? 
C41 C42 C49 120.4(2) . . ? 
C43 C42 C49 114.2(2) . . ? 
C48 C43 C44 118.6(3) . . ? 
C48 C43 C42 120.7(3) . . ? 
C44 C43 C42 120.7(3) . . ? 
C45 C44 C43 120.7(3) . . ? 
C45 C44 H44 119.7 . . ? 
C43 C44 H44 119.7 . . ? 
C44 C45 C46 120.5(3) . . ? 
C44 C45 H45 119.8 . . ? 
C46 C45 H45 119.8 . . ? 
C47 C46 C45 119.5(3) . . ? 
C47 C46 H46 120.3 . . ? 
C45 C46 H46 120.3 . . ? 
C46 C47 C48 120.3(3) . . ? 
C46 C47 H47 119.9 . . ? 
C48 C47 H47 119.9 . . ? 
C43 C48 C47 120.4(3) . . ? 
C43 C48 H48 119.8 . . ? 
C47 C48 H48 119.8 . . ? 
O1 C49 C42 108.7(2) . . ? 
O1 C49 C50 110.1(2) . . ? 
C42 C49 C50 113.2(2) . . ? 
O1 C49 H49 108.2 . . ? 
C42 C49 H49 108.2 . . ? 
C50 C49 H49 108.2 . . ? 
C51 C50 C55 118.7(3) . . ? 
C51 C50 C49 120.7(2) . . ? 
C55 C50 C49 120.6(3) . . ? 
C52 C51 C50 121.2(3) . . ? 
C52 C51 H51 119.4 . . ? 
C50 C51 H51 119.4 . . ? 
C53 C52 C51 119.0(3) . . ? 
C53 C52 H52 120.5 . . ? 
C51 C52 H52 120.5 . . ? 
C52 C53 C54 121.4(3) . . ? 
C52 C53 Cl1 118.6(2) . . ? 
C54 C53 Cl1 120.0(2) . . ? 
C53 C54 C55 118.7(3) . . ? 
C53 C54 H54 120.6 . . ? 
C55 C54 H54 120.6 . . ? 
C54 C55 C50 121.0(3) . . ? 
C54 C55 H55 119.5 . . ? 
C50 C55 H55 119.5 . . ? 
C61 C56 C57 110.9(7) . . ? 
C61 C56 H56A 109.5 . . ? 
C57 C56 H56A 109.5 . . ? 
C61 C56 H56B 109.5 . . ? 
C57 C56 H56B 109.5 . . ? 
H56A C56 H56B 108.1 . . ? 
C58 C57 C56 110.7(7) . . ? 
C58 C57 H57A 109.5 . . ? 
C56 C57 H57A 109.5 . . ? 
C58 C57 H57B 109.5 . . ? 
C56 C57 H57B 109.5 . . ? 
H57A C57 H57B 108.1 . . ? 
C59 C58 C57 109.4(6) . . ? 
C59 C58 H58A 109.8 . . ? 
C57 C58 H58A 109.8 . . ? 
C59 C58 H58B 109.8 . . ? 
C57 C58 H58B 109.8 . . ? 
H58A C58 H58B 108.2 . . ? 
C60 C59 C58 111.5(7) . . ? 
C60 C59 H59A 109.3 . . ? 
C58 C59 H59A 109.3 . . ? 
C60 C59 H59B 109.3 . . ? 
C58 C59 H59B 109.3 . . ? 
H59A C59 H59B 108.0 . . ? 
C59 C60 C61 111.3(10) . . ? 
C59 C60 H60A 109.4 . . ? 
C61 C60 H60A 109.4 . . ? 
C59 C60 H60B 109.4 . . ? 
C61 C60 H60B 109.4 . . ? 
H60A C60 H60B 108.0 . . ? 
C56 C61 C60 109.5(8) . . ? 
C56 C61 H61A 109.8 . . ? 
C60 C61 H61A 109.8 . . ? 
C56 C61 H61B 109.8 . . ? 
C60 C61 H61B 109.8 . . ? 
H61A C61 H61B 108.2 . . ? 
C61' C56' C57' 110.5(9) . . ? 
C61' C56' H56C 109.6 . . ? 
C57' C56' H56C 109.6 . . ? 
C61' C56' H56D 109.6 . . ? 
C57' C56' H56D 109.6 . . ? 
H56C C56' H56D 108.1 . . ? 
C56' C57' C58' 107.0(9) . . ? 
C56' C57' H57C 110.3 . . ? 
C58' C57' H57C 110.3 . . ? 
C56' C57' H57D 110.3 . . ? 
C58' C57' H57D 110.3 . . ? 
H57C C57' H57D 108.6 . . ? 
C59' C58' C57' 111.1(10) . . ? 
C59' C58' H58C 109.4 . . ? 
C57' C58' H58C 109.4 . . ? 
C59' C58' H58D 109.4 . . ? 
C57' C58' H58D 109.4 . . ? 
H58C C58' H58D 108.0 . . ? 
C60' C59' C58' 111.9(10) . . ? 
C60' C59' H59C 109.2 . . ? 
C58' C59' H59C 109.2 . . ? 
C60' C59' H59D 109.2 . . ? 
C58' C59' H59D 109.2 . . ? 
H59C C59' H59D 107.9 . . ? 
C59' C60' C61' 113.2(10) . . ? 
C59' C60' H60C 108.9 . . ? 
C61' C60' H60C 108.9 . . ? 
C59' C60' H60D 108.9 . . ? 
C61' C60' H60D 108.9 . . ? 
H60C C60' H60D 107.8 . . ? 
C60' C61' C56' 112.3(8) . . ? 
C60' C61' H61C 109.1 . . ? 
C56' C61' H61C 109.1 . . ? 
C60' C61' H61D 109.1 . . ? 
C56' C61' H61D 109.1 . . ? 
H61C C61' H61D 107.9 . . ? 
C49 O1 Th1 132.76(16) . . ? 
O1 Th1 C41 67.16(8) . . ? 
O1 Th1 C20 98.12(8) . . ? 
C41 Th1 C20 79.50(8) . . ? 
O1 Th1 C21 127.22(8) . . ? 
C41 Th1 C21 94.75(8) . . ? 
C20 Th1 C21 29.24(8) . . ? 
O1 Th1 C5 81.44(8) . . ? 
C41 Th1 C5 97.30(8) . . ? 
C20 Th1 C5 176.64(8) . . ? 
C21 Th1 C5 151.33(8) . . ? 
O1 Th1 C4 81.11(8) . . ? 
C41 Th1 C4 122.45(8) . . ? 
C20 Th1 C4 154.41(8) . . ? 
C21 Th1 C4 141.42(8) . . ? 
C5 Th1 C4 28.88(8) . . ? 
O1 Th1 C22 128.87(8) . . ? 
C41 Th1 C22 122.73(8) . . ? 
C20 Th1 C22 46.90(8) . . ? 
C21 Th1 C22 28.53(8) . . ? 
C5 Th1 C22 135.64(8) . . ? 
C4 Th1 C22 114.67(8) . . ? 
O1 Th1 C3 108.06(8) . . ? 
C41 Th1 C3 142.64(8) . . ? 
C20 Th1 C3 136.43(8) . . ? 
C21 Th1 C3 113.94(8) . . ? 
C5 Th1 C3 46.51(8) . . ? 
C4 Th1 C3 28.51(8) . . ? 
C22 Th1 C3 89.98(8) . . ? 
O1 Th1 C19 84.02(7) . . ? 
C41 Th1 C19 96.95(8) . . ? 
C20 Th1 C19 28.83(8) . . ? 
C21 Th1 C19 47.87(8) . . ? 
C5 Th1 C19 153.81(8) . . ? 
C4 Th1 C19 126.96(8) . . ? 
C22 Th1 C19 46.77(8) . . ? 
C3 Th1 C19 119.87(8) . . ? 
O1 Th1 C1 108.14(8) . . ? 
C41 Th1 C1 98.17(8) . . ? 
C20 Th1 C1 150.47(8) . . ? 
C21 Th1 C1 123.75(8) . . ? 
C5 Th1 C1 28.58(8) . . ? 
C4 Th1 C1 47.48(8) . . ? 
C22 Th1 C1 118.06(8) . . ? 
C3 Th1 C1 46.39(8) . . ? 
C19 Th1 C1 163.43(8) . . ? 
O1 Th1 C18 101.48(7) . . ? 
C41 Th1 C18 124.00(8) . . ? 
C20 Th1 C18 46.69(8) . . ? 
C21 Th1 C18 47.17(7) . . ? 
C5 Th1 C18 136.66(8) . . ? 
C4 Th1 C18 108.12(8) . . ? 
C22 Th1 C18 28.26(8) . . ? 
C3 Th1 C18 93.35(8) . . ? 
C19 Th1 C18 28.08(8) . . ? 
C1 Th1 C18 135.51(8) . . ? 
O1 Th1 C2 126.03(8) . . ? 
C41 Th1 C2 123.69(8) . . ? 
C20 Th1 C2 134.67(8) . . ? 
C21 Th1 C2 105.60(8) . . ? 
C5 Th1 C2 46.57(8) . . ? 
C4 Th1 C2 47.08(8) . . ? 
C22 Th1 C2 91.84(8) . . ? 
C3 Th1 C2 28.03(8) . . ? 
C19 Th1 C2 135.32(8) . . ? 
C1 Th1 C2 28.11(8) . . ? 
C18 Th1 C2 107.48(8) . . ? 
  
_diffrn_measured_fraction_theta_max    0.992 
_diffrn_reflns_theta_full              27.56 
_diffrn_measured_fraction_theta_full   0.992 
_refine_diff_density_max    2.625 
_refine_diff_density_min   -1.010 
_refine_diff_density_rms    0.105 

#===END
 
data_compound4 
 
_audit_creation_method            SHELXL-97 
_chemical_name_systematic 
; 
 ? 
; 
_chemical_name_common             ? 
_chemical_melting_point           ? 
_chemical_formula_moiety           'C104 H142 S4 Th2'  
_chemical_formula_sum 
 'C104 H142 S4 Th2' 
_chemical_formula_weight          1984.54
 
loop_ 
 _atom_type_symbol 
 _atom_type_description 
 _atom_type_scat_dispersion_real 
 _atom_type_scat_dispersion_imag 
 _atom_type_scat_source 
 'C'  'C'   0.0033   0.0016 
 'International Tables Vol C Tables 4.2.6.8 and 6.1.1.4' 
 'H'  'H'   0.0000   0.0000 
 'International Tables Vol C Tables 4.2.6.8 and 6.1.1.4' 
 'S'  'S'   0.1246   0.1234 
 'International Tables Vol C Tables 4.2.6.8 and 6.1.1.4' 
 'Th'  'Th'  -7.2400   8.8979 
 'International Tables Vol C Tables 4.2.6.8 and 6.1.1.4' 
 
_symmetry_cell_setting            Monoclinic 
_symmetry_space_group_name_H-M    P21/c 
 
loop_ 
 _symmetry_equiv_pos_as_xyz 
 'x, y, z' 
 '-x, y+1/2, -z+1/2' 
 '-x, -y, -z' 
 'x, -y-1/2, z-1/2' 
 
_cell_length_a                    30.937(4) 
_cell_length_b                    10.7644(15) 
_cell_length_c                    37.102(4) 
_cell_angle_alpha                 90.00 
_cell_angle_beta                  125.205(8) 
_cell_angle_gamma                 90.00 
_cell_volume                      10096(2) 
_cell_formula_units_Z             4 
_cell_measurement_temperature     100(2) 
_cell_measurement_reflns_used    7803
_cell_measurement_theta_min        2.19
_cell_measurement_theta_max       24.65
 
_exptl_crystal_description        block 
_exptl_crystal_colour             yellow 
_exptl_crystal_size_max           0.30 
_exptl_crystal_size_mid           0.21 
_exptl_crystal_size_min           0.15 
_exptl_crystal_density_meas       ? 
_exptl_crystal_density_diffrn     1.306 
_exptl_crystal_density_method     'not measured' 
_exptl_crystal_F_000              4040 
_exptl_absorpt_coefficient_mu     3.067 
_exptl_absorpt_correction_type    Multi-scan 
_exptl_absorpt_correction_T_min   0.4597 
_exptl_absorpt_correction_T_max   0.6562 
_exptl_absorpt_process_details    SADABS 
 
_exptl_special_details 
; 
 ? 
; 
 
_diffrn_ambient_temperature       100(2) 
_diffrn_radiation_wavelength      0.71073 
_diffrn_radiation_type            MoK\a 
_diffrn_radiation_source          'fine-focus sealed tube' 
_diffrn_radiation_monochromator   graphite 
_diffrn_measurement_device_type  'Bruker APEX-II CCD'
_diffrn_measurement_method       '\f and \w scans'
_diffrn_detector_area_resol_mean  ? 
_diffrn_reflns_number             22998 
_diffrn_reflns_av_R_equivalents   0.0000 
_diffrn_reflns_av_sigmaI/netI     0.0951 
_diffrn_reflns_limit_h_min        -40 
_diffrn_reflns_limit_h_max        32 
_diffrn_reflns_limit_k_min        0 
_diffrn_reflns_limit_k_max        13 
_diffrn_reflns_limit_l_min        0 
_diffrn_reflns_limit_l_max        48 
_diffrn_reflns_theta_min          1.92 
_diffrn_reflns_theta_max          27.46 
_reflns_number_total              22998 
_reflns_number_gt                 16483 
_reflns_threshold_expression      >2sigma(I) 
 
_computing_data_collection      'Bruker APEX2'
_computing_cell_refinement      'Bruker SAINT'
_computing_data_reduction       'Bruker SAINT' 
_computing_structure_solution   'SHELXS-97 (Sheldrick, 2008)'
_computing_structure_refinement 'SHELXL-97 (Sheldrick, 2008)'
_computing_molecular_graphics   'Bruker SHELXTL'
_computing_publication_material 'Bruker SHELXTL'
 
_refine_special_details 
; 
 Refinement of F^2^ against ALL reflections.  The weighted R-factor wR and 
 goodness of fit S are based on F^2^, conventional R-factors R are based 
 on F, with F set to zero for negative F^2^. The threshold expression of 
 F^2^ > 2sigma(F^2^) is used only for calculating R-factors(gt) etc. and is 
 not relevant to the choice of reflections for refinement.  R-factors based 
 on F^2^ are statistically about twice as large as those based on F, and R- 
 factors based on ALL data will be even larger. 
; 
 
_refine_ls_structure_factor_coef  Fsqd  
_refine_ls_matrix_type            full 
_refine_ls_weighting_scheme       calc  
_refine_ls_weighting_details 
 'calc w=1/[\s^2^(Fo^2^)+(0.0170P)^2^+0.0000P] where P=(Fo^2^+2Fc^2^)/3' 
_atom_sites_solution_primary      direct 
_atom_sites_solution_secondary    difmap 
_atom_sites_solution_hydrogens    geom 
_refine_ls_hydrogen_treatment     constr 
_refine_ls_extinction_method      none 
_refine_ls_extinction_coef        ? 
_refine_ls_number_reflns          22998 
_refine_ls_number_parameters      1027 
_refine_ls_number_restraints      0 
_refine_ls_R_factor_all           0.0709 
_refine_ls_R_factor_gt            0.0435 
_refine_ls_wR_factor_ref          0.0902 
_refine_ls_wR_factor_gt           0.0834 
_refine_ls_goodness_of_fit_ref    0.944 
_refine_ls_restrained_S_all       0.944 
_refine_ls_shift/su_max           0.003 
_refine_ls_shift/su_mean          0.000 

loop_
  _platon_squeeze_void_nr
  _platon_squeeze_void_average_x
  _platon_squeeze_void_average_y
  _platon_squeeze_void_average_z
  _platon_squeeze_void_volume
  _platon_squeeze_void_count_electrons
  _platon_squeeze_void_content
   1  0.000  0.857  0.250       524       108 ' '
   2  0.000  0.625  0.750       524       108 ' '
   3  0.426  0.559  0.227        15         2 ' '
   4  0.426  0.941  0.727        15         2 ' '
   5  0.574  0.059  0.273        15         2 ' '
   6  0.574  0.441  0.773        15         2 ' '
_platon_squeeze_details                           ?
 
loop_ 
 _atom_site_label 
 _atom_site_type_symbol 
 _atom_site_fract_x 
 _atom_site_fract_y 
 _atom_site_fract_z 
 _atom_site_U_iso_or_equiv 
 _atom_site_adp_type 
 _atom_site_occupancy 
 _atom_site_symmetry_multiplicity 
 _atom_site_calc_flag 
 _atom_site_refinement_flags 
 _atom_site_disorder_assembly 
 _atom_site_disorder_group 
C1 C 0.15498(17) 0.2699(4) 0.73804(16) 0.0179(10) Uani 1 1 d . . . 
C2 C 0.10835(17) 0.2801(4) 0.69337(17) 0.0179(10) Uani 1 1 d . . . 
C3 C 0.10524(17) 0.4070(4) 0.68035(16) 0.0192(11) Uani 1 1 d . . . 
H3 H 0.0790 0.4395 0.6520 0.023 Uiso 1 1 calc R . . 
C4 C 0.14733(17) 0.4772(4) 0.71605(16) 0.0179(10) Uani 1 1 d . . . 
C5 C 0.17837(17) 0.3915(4) 0.75003(16) 0.0164(10) Uani 1 1 d . . . 
H5 H 0.2106 0.4112 0.7774 0.020 Uiso 1 1 calc R . . 
C6 C 0.17363(18) 0.1695(4) 0.77472(17) 0.0194(10) Uani 1 1 d . . . 
C7 C 0.22187(18) 0.2151(4) 0.81918(16) 0.0255(12) Uani 1 1 d . . . 
H7A H 0.2125 0.2906 0.8280 0.038 Uiso 1 1 calc R . . 
H7B H 0.2509 0.2335 0.8164 0.038 Uiso 1 1 calc R . . 
H7C H 0.2331 0.1505 0.8415 0.038 Uiso 1 1 calc R . . 
C8 C 0.12918(19) 0.1535(4) 0.78160(18) 0.0280(12) Uani 1 1 d . . . 
H8A H 0.0997 0.1077 0.7566 0.042 Uiso 1 1 calc R . . 
H8B H 0.1169 0.2354 0.7836 0.042 Uiso 1 1 calc R . . 
H8C H 0.1428 0.1072 0.8089 0.042 Uiso 1 1 calc R . . 
C9 C 0.18718(18) 0.0419(4) 0.76469(18) 0.0257(12) Uani 1 1 d . . . 
H9A H 0.1882 -0.0210 0.7843 0.039 Uiso 1 1 calc R . . 
H9B H 0.2218 0.0463 0.7695 0.039 Uiso 1 1 calc R . . 
H9C H 0.1602 0.0194 0.7339 0.039 Uiso 1 1 calc R . . 
C10 C 0.05784(18) 0.1983(4) 0.66374(18) 0.0232(11) Uani 1 1 d . . . 
C11 C 0.01790(18) 0.2410(5) 0.67389(17) 0.0257(12) Uani 1 1 d . . . 
H11A H 0.0097 0.3291 0.6665 0.038 Uiso 1 1 calc R . . 
H11B H 0.0335 0.2287 0.7053 0.038 Uiso 1 1 calc R . . 
H11C H -0.0146 0.1919 0.6563 0.038 Uiso 1 1 calc R . . 
C12 C 0.06510(18) 0.0563(4) 0.66995(18) 0.0266(12) Uani 1 1 d . . . 
H12A H 0.0310 0.0152 0.6498 0.040 Uiso 1 1 calc R . . 
H12B H 0.0788 0.0350 0.7004 0.040 Uiso 1 1 calc R . . 
H12C H 0.0902 0.0285 0.6636 0.040 Uiso 1 1 calc R . . 
C13 C 0.03244(18) 0.2226(4) 0.61464(16) 0.0234(11) Uani 1 1 d . . . 
H13A H 0.0574 0.1998 0.6075 0.035 Uiso 1 1 calc R . . 
H13B H 0.0235 0.3108 0.6082 0.035 Uiso 1 1 calc R . . 
H13C H 0.0002 0.1725 0.5968 0.035 Uiso 1 1 calc R . . 
C14 C 0.14621(18) 0.6173(4) 0.72263(17) 0.0219(11) Uani 1 1 d . . . 
C15 C 0.20161(19) 0.6755(4) 0.75126(19) 0.0292(13) Uani 1 1 d . . . 
H15A H 0.2225 0.6323 0.7797 0.044 Uiso 1 1 calc R . . 
H15B H 0.1985 0.7635 0.7561 0.044 Uiso 1 1 calc R . . 
H15C H 0.2191 0.6676 0.7362 0.044 Uiso 1 1 calc R . . 
C16 C 0.1217(2) 0.6284(5) 0.7490(2) 0.0435(16) Uani 1 1 d . . . 
H16A H 0.0886 0.5813 0.7339 0.065 Uiso 1 1 calc R . . 
H16B H 0.1146 0.7159 0.7509 0.065 Uiso 1 1 calc R . . 
H16C H 0.1465 0.5948 0.7787 0.065 Uiso 1 1 calc R . . 
C17 C 0.1097(2) 0.6889(5) 0.67974(19) 0.0397(15) Uani 1 1 d . . . 
H17A H 0.1233 0.6836 0.6616 0.060 Uiso 1 1 calc R . . 
H17B H 0.1082 0.7762 0.6865 0.060 Uiso 1 1 calc R . . 
H17C H 0.0741 0.6530 0.6636 0.060 Uiso 1 1 calc R . . 
C18 C 0.29316(18) 0.2786(4) 0.69243(17) 0.0188(11) Uani 1 1 d . . . 
C19 C 0.30899(17) 0.3277(4) 0.73463(16) 0.0174(10) Uani 1 1 d . . . 
C20 C 0.29202(16) 0.4548(4) 0.72764(15) 0.0145(10) Uani 1 1 d . . . 
H20 H 0.2962 0.5086 0.7498 0.017 Uiso 1 1 calc R . . 
C21 C 0.26823(17) 0.4885(4) 0.68325(16) 0.0178(10) Uani 1 1 d . . . 
C22 C 0.26686(17) 0.3792(4) 0.66125(16) 0.0179(10) Uani 1 1 d . . . 
H22 H 0.2510 0.3731 0.6305 0.022 Uiso 1 1 calc R . . 
C23 C 0.31069(19) 0.1660(4) 0.67787(18) 0.0214(11) Uani 1 1 d . . . 
C24 C 0.3204(2) 0.0435(4) 0.70245(19) 0.0328(13) Uani 1 1 d . . . 
H24A H 0.3496 0.0541 0.7336 0.049 Uiso 1 1 calc R . . 
H24B H 0.3294 -0.0215 0.6894 0.049 Uiso 1 1 calc R . . 
H24C H 0.2883 0.0197 0.7001 0.049 Uiso 1 1 calc R . . 
C25 C 0.26999(19) 0.1362(4) 0.62814(18) 0.0272(12) Uani 1 1 d . . . 
H25A H 0.2825 0.0652 0.6200 0.041 Uiso 1 1 calc R . . 
H25B H 0.2660 0.2087 0.6105 0.041 Uiso 1 1 calc R . . 
H25C H 0.2358 0.1159 0.6226 0.041 Uiso 1 1 calc R . . 
C26 C 0.36291(19) 0.2053(5) 0.6844(2) 0.0308(13) Uani 1 1 d . . . 
H26A H 0.3898 0.2222 0.7157 0.046 Uiso 1 1 calc R . . 
H26B H 0.3568 0.2804 0.6671 0.046 Uiso 1 1 calc R . . 
H26C H 0.3751 0.1382 0.6745 0.046 Uiso 1 1 calc R . . 
C27 C 0.34029(19) 0.2724(4) 0.78115(17) 0.0228(11) Uani 1 1 d . . . 
C28 C 0.3113(2) 0.1585(5) 0.7829(2) 0.0399(15) Uani 1 1 d . . . 
H28A H 0.2766 0.1840 0.7754 0.060 Uiso 1 1 calc R . . 
H28B H 0.3322 0.1231 0.8127 0.060 Uiso 1 1 calc R . . 
H28C H 0.3066 0.0960 0.7617 0.060 Uiso 1 1 calc R . . 
C29 C 0.39775(19) 0.2390(5) 0.79716(19) 0.0387(15) Uani 1 1 d . . . 
H29A H 0.3967 0.1778 0.7771 0.058 Uiso 1 1 calc R . . 
H29B H 0.4169 0.2042 0.8270 0.058 Uiso 1 1 calc R . . 
H29C H 0.4159 0.3141 0.7975 0.058 Uiso 1 1 calc R . . 
C30 C 0.34576(19) 0.3666(4) 0.81511(17) 0.0267(12) Uani 1 1 d . . . 
H30A H 0.3649 0.4402 0.8158 0.040 Uiso 1 1 calc R . . 
H30B H 0.3653 0.3282 0.8444 0.040 Uiso 1 1 calc R . . 
H30C H 0.3105 0.3911 0.8066 0.040 Uiso 1 1 calc R . . 
C31 C 0.24911(18) 0.6158(4) 0.66282(17) 0.0206(11) Uani 1 1 d . . . 
C32 C 0.1899(2) 0.6224(5) 0.6464(2) 0.0407(15) Uani 1 1 d . . . 
H32A H 0.1868 0.5942 0.6700 0.061 Uiso 1 1 calc R . . 
H32B H 0.1685 0.5688 0.6205 0.061 Uiso 1 1 calc R . . 
H32C H 0.1773 0.7082 0.6385 0.061 Uiso 1 1 calc R . . 
C33 C 0.2777(2) 0.7186(5) 0.69672(19) 0.0395(15) Uani 1 1 d . . . 
H33A H 0.3141 0.7252 0.7053 0.059 Uiso 1 1 calc R . . 
H33B H 0.2781 0.6994 0.7227 0.059 Uiso 1 1 calc R . . 
H33C H 0.2593 0.7976 0.6840 0.059 Uiso 1 1 calc R . . 
C34 C 0.2518(3) 0.6351(5) 0.6246(2) 0.0480(17) Uani 1 1 d . . . 
H34A H 0.2400 0.7194 0.6131 0.072 Uiso 1 1 calc R . . 
H34B H 0.2289 0.5747 0.6015 0.072 Uiso 1 1 calc R . . 
H34C H 0.2883 0.6239 0.6340 0.072 Uiso 1 1 calc R . . 
C35 C 0.14917(17) 0.0619(4) 0.61250(17) 0.0198(11) Uani 1 1 d . . . 
C36 C 0.12746(17) 0.1730(4) 0.58390(16) 0.0163(10) Uani 1 1 d . . . 
C37 C 0.13679(17) 0.2891(4) 0.60161(16) 0.0189(10) Uani 1 1 d . . . 
C38 C 0.09364(18) 0.1511(4) 0.53466(17) 0.0199(11) Uani 1 1 d . . . 
C39 C 0.1158(2) 0.1462(4) 0.51112(18) 0.0235(11) Uani 1 1 d . . . 
H39 H 0.1532 0.1496 0.5266 0.028 Uiso 1 1 calc R . . 
C40 C 0.0846(2) 0.1364(4) 0.46556(19) 0.0337(14) Uani 1 1 d . . . 
H40 H 0.1004 0.1339 0.4500 0.040 Uiso 1 1 calc R . . 
C41 C 0.0304(2) 0.1303(5) 0.44305(19) 0.0345(14) Uani 1 1 d . . . 
H41 H 0.0087 0.1255 0.4118 0.041 Uiso 1 1 calc R . . 
C42 C 0.0074(2) 0.1312(5) 0.4659(2) 0.0347(14) Uani 1 1 d . . . 
H42 H -0.0299 0.1235 0.4504 0.042 Uiso 1 1 calc R . . 
C43 C 0.03914(19) 0.1434(4) 0.51191(18) 0.0266(12) Uani 1 1 d . . . 
H43 H 0.0233 0.1463 0.5275 0.032 Uiso 1 1 calc R . . 
C44 C 0.11446(17) 0.3970(4) 0.57030(16) 0.0191(11) Uani 1 1 d . . . 
C45 C 0.1351(2) 0.4323(4) 0.54670(17) 0.0256(12) Uani 1 1 d . . . 
H45 H 0.1622 0.3834 0.5491 0.031 Uiso 1 1 calc R . . 
C46 C 0.1170(2) 0.5370(5) 0.51986(18) 0.0347(14) Uani 1 1 d . . . 
H46 H 0.1317 0.5584 0.5042 0.042 Uiso 1 1 calc R . . 
C47 C 0.0777(2) 0.6098(5) 0.51590(19) 0.0379(15) Uani 1 1 d . . . 
H47 H 0.0656 0.6824 0.4981 0.045 Uiso 1 1 calc R . . 
C48 C 0.0564(2) 0.5748(5) 0.5385(2) 0.0377(15) Uani 1 1 d . . . 
H48 H 0.0288 0.6233 0.5355 0.045 Uiso 1 1 calc R . . 
C49 C 0.07418(19) 0.4707(4) 0.56532(18) 0.0293(13) Uani 1 1 d . . . 
H49 H 0.0589 0.4493 0.5805 0.035 Uiso 1 1 calc R . . 
C50 C 0.20676(17) 0.8299(4) 0.93252(16) 0.0174(10) Uani 1 1 d . . . 
C51 C 0.21351(17) 0.7785(4) 0.97171(16) 0.0160(10) Uani 1 1 d . . . 
C52 C 0.23897(17) 0.8711(4) 1.00525(17) 0.0172(10) Uani 1 1 d . . . 
H52 H 0.2489 0.8615 1.0346 0.021 Uiso 1 1 calc R . . 
C53 C 0.24715(16) 0.9794(4) 0.98838(16) 0.0155(10) Uani 1 1 d . . . 
C54 C 0.22863(16) 0.9519(4) 0.94497(15) 0.0149(10) Uani 1 1 d . . . 
H54 H 0.2304 1.0077 0.9260 0.018 Uiso 1 1 calc R . . 
C55 C 0.17317(18) 0.7949(4) 0.88299(17) 0.0219(11) Uani 1 1 d . . . 
C56 C 0.20037(18) 0.8401(4) 0.86115(16) 0.0239(11) Uani 1 1 d . . . 
H56A H 0.2077 0.9293 0.8665 0.036 Uiso 1 1 calc R . . 
H56B H 0.1770 0.8249 0.8293 0.036 Uiso 1 1 calc R . . 
H56C H 0.2336 0.7948 0.8737 0.036 Uiso 1 1 calc R . . 
C57 C 0.1615(2) 0.6554(4) 0.87081(18) 0.0309(13) Uani 1 1 d . . . 
H57A H 0.1950 0.6096 0.8853 0.046 Uiso 1 1 calc R . . 
H57B H 0.1418 0.6458 0.8388 0.046 Uiso 1 1 calc R . . 
H57C H 0.1405 0.6225 0.8807 0.046 Uiso 1 1 calc R . . 
C58 C 0.12075(18) 0.8660(5) 0.86104(19) 0.0346(14) Uani 1 1 d . . . 
H58A H 0.1025 0.8405 0.8744 0.052 Uiso 1 1 calc R . . 
H58B H 0.0984 0.8473 0.8294 0.052 Uiso 1 1 calc R . . 
H58C H 0.1279 0.9554 0.8653 0.052 Uiso 1 1 calc R . . 
C59 C 0.18646(18) 0.6645(4) 0.97772(16) 0.0190(10) Uani 1 1 d . . . 
C60 C 0.20141(18) 0.5365(4) 0.96885(17) 0.0219(11) Uani 1 1 d . . . 
H60A H 0.2384 0.5175 0.9924 0.033 Uiso 1 1 calc R . . 
H60B H 0.1969 0.5385 0.9405 0.033 Uiso 1 1 calc R . . 
H60C H 0.1784 0.4723 0.9681 0.033 Uiso 1 1 calc R . . 
C61 C 0.12614(18) 0.6828(4) 0.94738(18) 0.0246(12) Uani 1 1 d . . . 
H61A H 0.1089 0.6192 0.9539 0.037 Uiso 1 1 calc R . . 
H61B H 0.1139 0.6756 0.9165 0.037 Uiso 1 1 calc R . . 
H61C H 0.1172 0.7654 0.9524 0.037 Uiso 1 1 calc R . . 
C62 C 0.20142(19) 0.6604(4) 1.02518(17) 0.0215(11) Uani 1 1 d . . . 
H62A H 0.1835 0.5903 1.0281 0.032 Uiso 1 1 calc R . . 
H62B H 0.1905 0.7381 1.0316 0.032 Uiso 1 1 calc R . . 
H62C H 0.2398 0.6504 1.0460 0.032 Uiso 1 1 calc R . . 
C63 C 0.26064(18) 1.1078(4) 1.00932(18) 0.0227(12) Uani 1 1 d . . . 
C64 C 0.2088(2) 1.1794(4) 0.9897(2) 0.0360(15) Uani 1 1 d . . . 
H64A H 0.1857 1.1330 0.9949 0.054 Uiso 1 1 calc R . . 
H64B H 0.1912 1.1896 0.9579 0.054 Uiso 1 1 calc R . . 
H64C H 0.2165 1.2612 1.0037 0.054 Uiso 1 1 calc R . . 
C65 C 0.28892(19) 1.0998(4) 1.05924(17) 0.0259(12) Uani 1 1 d . . . 
H65A H 0.2649 1.0647 1.0657 0.039 Uiso 1 1 calc R . . 
H65B H 0.2999 1.1832 1.0721 0.039 Uiso 1 1 calc R . . 
H65C H 0.3202 1.0465 1.0720 0.039 Uiso 1 1 calc R . . 
C66 C 0.2945(2) 1.1811(4) 0.99784(19) 0.0285(12) Uani 1 1 d . . . 
H66A H 0.3042 1.2620 1.0127 0.043 Uiso 1 1 calc R . . 
H66B H 0.2741 1.1936 0.9659 0.043 Uiso 1 1 calc R . . 
H66C H 0.3267 1.1340 1.0078 0.043 Uiso 1 1 calc R . . 
C67 C 0.40234(17) 0.7180(4) 1.08202(16) 0.0178(10) Uani 1 1 d . . . 
C68 C 0.42495(17) 0.7034(4) 1.05728(16) 0.0167(10) Uani 1 1 d . . . 
C69 C 0.43345(17) 0.8262(4) 1.04833(15) 0.0157(10) Uani 1 1 d . . . 
H69 H 0.4451 0.8458 1.0302 0.019 Uiso 1 1 calc R . . 
C70 C 0.42235(16) 0.9146(4) 1.06985(16) 0.0162(10) Uani 1 1 d . . . 
C71 C 0.40135(17) 0.8474(4) 1.08866(16) 0.0182(10) Uani 1 1 d . . . 
H71 H 0.3882 0.8836 1.1039 0.022 Uiso 1 1 calc R . . 
C72 C 0.38636(19) 0.6230(4) 1.10333(17) 0.0240(11) Uani 1 1 d . . . 
C73 C 0.3623(2) 0.6897(5) 1.12507(19) 0.0306(13) Uani 1 1 d . . . 
H73A H 0.3897 0.7390 1.1502 0.046 Uiso 1 1 calc R . . 
H73B H 0.3484 0.6277 1.1353 0.046 Uiso 1 1 calc R . . 
H73C H 0.3335 0.7445 1.1034 0.046 Uiso 1 1 calc R . . 
C74 C 0.4346(2) 0.5514(5) 1.14074(19) 0.0389(15) Uani 1 1 d . . . 
H74A H 0.4519 0.5079 1.1290 0.058 Uiso 1 1 calc R . . 
H74B H 0.4231 0.4909 1.1533 0.058 Uiso 1 1 calc R . . 
H74C H 0.4596 0.6098 1.1637 0.058 Uiso 1 1 calc R . . 
C75 C 0.3432(2) 0.5350(5) 1.06858(19) 0.0335(14) Uani 1 1 d . . . 
H75A H 0.3125 0.5836 1.0461 0.050 Uiso 1 1 calc R . . 
H75B H 0.3327 0.4779 1.0828 0.050 Uiso 1 1 calc R . . 
H75C H 0.3569 0.4873 1.0547 0.050 Uiso 1 1 calc R . . 
C76 C 0.45228(19) 0.5950(4) 1.05011(18) 0.0253(12) Uani 1 1 d . . . 
C77 C 0.51044(19) 0.5961(5) 1.09244(19) 0.0342(14) Uani 1 1 d . . . 
H77A H 0.5265 0.6773 1.0953 0.051 Uiso 1 1 calc R . . 
H77B H 0.5309 0.5311 1.0901 0.051 Uiso 1 1 calc R . . 
H77C H 0.5104 0.5807 1.1184 0.051 Uiso 1 1 calc R . . 
C78 C 0.4306(2) 0.4612(4) 1.0445(2) 0.0358(14) Uani 1 1 d . . . 
H78A H 0.4295 0.4406 1.0697 0.054 Uiso 1 1 calc R . . 
H78B H 0.4537 0.4024 1.0431 0.054 Uiso 1 1 calc R . . 
H78C H 0.3948 0.4562 1.0173 0.054 Uiso 1 1 calc R . . 
C79 C 0.4543(2) 0.6173(4) 1.01038(18) 0.0259(12) Uani 1 1 d . . . 
H79A H 0.4183 0.6164 0.9833 0.039 Uiso 1 1 calc R . . 
H79B H 0.4752 0.5516 1.0090 0.039 Uiso 1 1 calc R . . 
H79C H 0.4707 0.6981 1.0134 0.039 Uiso 1 1 calc R . . 
C80 C 0.44945(17) 1.0437(4) 1.08440(16) 0.0202(11) Uani 1 1 d . . . 
C81 C 0.45041(18) 1.1107(4) 1.04844(16) 0.0195(11) Uani 1 1 d . . . 
H81A H 0.4142 1.1327 1.0240 0.029 Uiso 1 1 calc R . . 
H81B H 0.4658 1.0558 1.0376 0.029 Uiso 1 1 calc R . . 
H81C H 0.4718 1.1863 1.0607 0.029 Uiso 1 1 calc R . . 
C82 C 0.4264(2) 1.1295(5) 1.10221(18) 0.0291(12) Uani 1 1 d . . . 
H82A H 0.4475 1.2057 1.1137 0.044 Uiso 1 1 calc R . . 
H82B H 0.4271 1.0873 1.1260 0.044 Uiso 1 1 calc R . . 
H82C H 0.3898 1.1505 1.0784 0.044 Uiso 1 1 calc R . . 
C83 C 0.50742(17) 1.0138(4) 1.12370(17) 0.0258(12) Uani 1 1 d . . . 
H83A H 0.5238 0.9599 1.1135 0.039 Uiso 1 1 calc R . . 
H83B H 0.5073 0.9714 1.1470 0.039 Uiso 1 1 calc R . . 
H83C H 0.5276 1.0912 1.1353 0.039 Uiso 1 1 calc R . . 
C84 C 0.31473(17) 0.6175(4) 0.91505(15) 0.0154(10) Uani 1 1 d . . . 
C85 C 0.33601(16) 0.7403(4) 0.91370(15) 0.0142(10) Uani 1 1 d . . . 
C86 C 0.34167(17) 0.8346(4) 0.94047(16) 0.0155(10) Uani 1 1 d . . . 
C87 C 0.34798(17) 0.7525(4) 0.88003(16) 0.0152(10) Uani 1 1 d . . . 
C88 C 0.39138(19) 0.6941(4) 0.88535(18) 0.0240(11) Uani 1 1 d . . . 
H88 H 0.4138 0.6440 0.9106 0.029 Uiso 1 1 calc R . . 
C89 C 0.40231(19) 0.7083(4) 0.85400(18) 0.0245(12) Uani 1 1 d . . . 
H89 H 0.4326 0.6694 0.8584 0.029 Uiso 1 1 calc R . . 
C90 C 0.36887(19) 0.7794(4) 0.81617(17) 0.0234(11) Uani 1 1 d . . . 
H90 H 0.3759 0.7884 0.7946 0.028 Uiso 1 1 calc R . . 
C91 C 0.32543(19) 0.8364(4) 0.81062(17) 0.0235(11) Uani 1 1 d . . . 
H91 H 0.3023 0.8843 0.7849 0.028 Uiso 1 1 calc R . . 
C92 C 0.31542(18) 0.8245(4) 0.84209(16) 0.0194(10) Uani 1 1 d . . . 
H92 H 0.2858 0.8659 0.8380 0.023 Uiso 1 1 calc R . . 
C93 C 0.36212(17) 0.9568(4) 0.93793(15) 0.0145(10) Uani 1 1 d . . . 
C94 C 0.41140(17) 0.9734(4) 0.94528(16) 0.0200(11) Uani 1 1 d . . . 
H94 H 0.4330 0.9028 0.9514 0.024 Uiso 1 1 calc R . . 
C95 C 0.42953(19) 1.0885(4) 0.94400(17) 0.0249(12) Uani 1 1 d . . . 
H95 H 0.4632 1.0960 0.9490 0.030 Uiso 1 1 calc R . . 
C96 C 0.39913(19) 1.1949(4) 0.93543(17) 0.0250(12) Uani 1 1 d . . . 
H96 H 0.4118 1.2744 0.9346 0.030 Uiso 1 1 calc R . . 
C97 C 0.35002(19) 1.1824(4) 0.92820(16) 0.0226(11) Uani 1 1 d . . . 
H97 H 0.3288 1.2536 0.9224 0.027 Uiso 1 1 calc R . . 
C98 C 0.33212(17) 1.0654(4) 0.92946(15) 0.0164(10) Uani 1 1 d . . . 
H98 H 0.2984 1.0581 0.9244 0.020 Uiso 1 1 calc R . . 
S1 S 0.14056(5) -0.07859(11) 0.59104(5) 0.0301(3) Uani 1 1 d . . . 
S2 S 0.18428(5) 0.07765(10) 0.66984(4) 0.0205(3) Uani 1 1 d . . . 
S3 S 0.29936(6) 0.50767(11) 0.87844(5) 0.0325(3) Uani 1 1 d . . . 
S4 S 0.30419(5) 0.58907(11) 0.95588(4) 0.0220(3) Uani 1 1 d . . . 
Th1 Th 0.195362(6) 0.331315(14) 0.684348(6) 0.01457(5) Uani 1 1 d . . . 
Th2 Th 0.322623(6) 0.814034(15) 0.997847(6) 0.01418(5) Uani 1 1 d . . . 
C99 C 0.4138(3) 0.9789(6) 0.2316(3) 0.061(2) Uani 1 1 d . . . 
H99 H 0.3868 1.0390 0.2222 0.073 Uiso 1 1 calc R . . 
C104 C 0.4408(3) 0.9730(6) 0.2128(3) 0.063(2) Uani 1 1 d . . . 
H104 H 0.4331 1.0315 0.1906 0.075 Uiso 1 1 calc R . . 
C100 C 0.4268(3) 0.8947(6) 0.2648(3) 0.062(2) Uani 1 1 d . . . 
H100 H 0.4096 0.9006 0.2792 0.074 Uiso 1 1 calc R . . 
C103 C 0.4792(3) 0.8843(8) 0.2252(3) 0.069(2) Uani 1 1 d . . . 
H103 H 0.4983 0.8827 0.2123 0.083 Uiso 1 1 calc R . . 
C101 C 0.4627(3) 0.8060(7) 0.2770(3) 0.078(3) Uani 1 1 d . . . 
H101 H 0.4703 0.7486 0.2994 0.094 Uiso 1 1 calc R . . 
C102 C 0.4893(3) 0.7973(8) 0.2568(4) 0.094(3) Uani 1 1 d . . . 
H102 H 0.5140 0.7324 0.2646 0.112 Uiso 1 1 calc R . . 
 
loop_ 
 _atom_site_aniso_label 
 _atom_site_aniso_U_11 
 _atom_site_aniso_U_22 
 _atom_site_aniso_U_33 
 _atom_site_aniso_U_23 
 _atom_site_aniso_U_13 
 _atom_site_aniso_U_12 
C1 0.011(2) 0.022(2) 0.018(3) -0.002(2) 0.006(2) 0.0012(19) 
C2 0.012(2) 0.016(2) 0.025(3) -0.002(2) 0.010(2) 0.0002(18) 
C3 0.015(2) 0.025(3) 0.017(3) -0.001(2) 0.008(2) 0.0052(19) 
C4 0.014(2) 0.016(2) 0.023(3) -0.005(2) 0.011(2) 0.0016(18) 
C5 0.017(2) 0.016(2) 0.017(3) -0.0051(19) 0.010(2) -0.0025(19) 
C6 0.017(2) 0.018(2) 0.022(3) 0.000(2) 0.011(2) -0.0025(19) 
C7 0.024(3) 0.024(3) 0.019(3) 0.003(2) 0.007(2) -0.004(2) 
C8 0.031(3) 0.029(3) 0.021(3) 0.003(2) 0.014(3) -0.002(2) 
C9 0.023(3) 0.015(2) 0.029(3) 0.002(2) 0.009(2) -0.002(2) 
C10 0.016(3) 0.023(3) 0.026(3) -0.006(2) 0.009(2) -0.005(2) 
C11 0.021(3) 0.029(3) 0.023(3) -0.005(2) 0.010(2) -0.003(2) 
C12 0.017(3) 0.023(3) 0.030(3) -0.009(2) 0.008(2) -0.005(2) 
C13 0.016(3) 0.029(3) 0.020(3) -0.012(2) 0.008(2) -0.009(2) 
C14 0.022(3) 0.016(2) 0.026(3) -0.002(2) 0.013(2) -0.001(2) 
C15 0.030(3) 0.022(3) 0.037(3) -0.010(2) 0.021(3) -0.005(2) 
C16 0.048(4) 0.035(3) 0.062(5) -0.018(3) 0.040(4) -0.002(3) 
C17 0.045(4) 0.024(3) 0.031(4) 0.004(3) 0.011(3) 0.004(3) 
C18 0.020(3) 0.016(2) 0.027(3) -0.001(2) 0.018(2) -0.0056(19) 
C19 0.014(2) 0.022(3) 0.018(3) 0.001(2) 0.010(2) -0.0048(19) 
C20 0.015(2) 0.013(2) 0.017(3) -0.0014(19) 0.010(2) -0.0036(18) 
C21 0.016(2) 0.018(2) 0.021(3) 0.001(2) 0.012(2) -0.0036(19) 
C22 0.021(3) 0.018(2) 0.016(3) -0.006(2) 0.011(2) -0.0069(19) 
C23 0.022(3) 0.017(2) 0.031(3) -0.004(2) 0.019(2) -0.002(2) 
C24 0.034(3) 0.023(3) 0.039(4) -0.005(3) 0.020(3) 0.004(2) 
C25 0.031(3) 0.023(3) 0.035(3) -0.010(2) 0.023(3) -0.006(2) 
C26 0.026(3) 0.030(3) 0.044(4) -0.013(3) 0.024(3) -0.001(2) 
C27 0.025(3) 0.022(3) 0.019(3) 0.006(2) 0.011(2) 0.006(2) 
C28 0.064(4) 0.025(3) 0.034(4) 0.004(3) 0.030(3) -0.003(3) 
C29 0.025(3) 0.044(4) 0.027(3) 0.004(3) 0.003(3) 0.017(3) 
C30 0.026(3) 0.027(3) 0.021(3) 0.005(2) 0.010(2) 0.000(2) 
C31 0.024(3) 0.018(2) 0.022(3) -0.004(2) 0.014(2) -0.003(2) 
C32 0.042(4) 0.028(3) 0.038(4) 0.004(3) 0.015(3) 0.004(3) 
C33 0.062(4) 0.019(3) 0.029(3) 0.001(2) 0.021(3) -0.010(3) 
C34 0.079(5) 0.026(3) 0.049(4) -0.003(3) 0.043(4) -0.007(3) 
C35 0.017(3) 0.021(3) 0.024(3) -0.001(2) 0.013(2) -0.0007(19) 
C36 0.011(2) 0.015(2) 0.021(3) 0.000(2) 0.008(2) 0.0009(18) 
C37 0.013(2) 0.021(2) 0.018(3) 0.002(2) 0.007(2) -0.0010(19) 
C38 0.023(3) 0.008(2) 0.022(3) 0.0001(19) 0.009(2) 0.0016(18) 
C39 0.025(3) 0.018(3) 0.030(3) -0.003(2) 0.017(3) 0.004(2) 
C40 0.052(4) 0.022(3) 0.025(3) -0.001(2) 0.021(3) 0.009(2) 
C41 0.041(4) 0.028(3) 0.018(3) -0.009(2) 0.008(3) 0.000(2) 
C42 0.025(3) 0.026(3) 0.032(4) -0.003(2) 0.005(3) -0.002(2) 
C43 0.022(3) 0.026(3) 0.024(3) -0.004(2) 0.010(2) -0.005(2) 
C44 0.020(3) 0.010(2) 0.018(3) -0.0035(19) 0.006(2) -0.0048(18) 
C45 0.037(3) 0.018(3) 0.023(3) -0.002(2) 0.018(3) -0.001(2) 
C46 0.049(4) 0.024(3) 0.027(3) 0.002(2) 0.020(3) -0.008(3) 
C47 0.039(4) 0.026(3) 0.024(3) 0.010(2) 0.003(3) 0.005(3) 
C48 0.022(3) 0.029(3) 0.044(4) 0.010(3) 0.008(3) 0.007(2) 
C49 0.025(3) 0.023(3) 0.037(4) 0.012(2) 0.016(3) 0.006(2) 
C50 0.013(2) 0.022(2) 0.017(3) 0.000(2) 0.008(2) -0.0001(19) 
C51 0.011(2) 0.014(2) 0.021(3) 0.0027(19) 0.009(2) 0.0034(18) 
C52 0.015(2) 0.020(2) 0.021(3) 0.002(2) 0.013(2) 0.0009(19) 
C53 0.015(2) 0.011(2) 0.027(3) -0.0023(19) 0.015(2) 0.0010(17) 
C54 0.010(2) 0.016(2) 0.017(3) 0.0044(19) 0.007(2) 0.0011(17) 
C55 0.015(3) 0.031(3) 0.019(3) 0.004(2) 0.010(2) -0.002(2) 
C56 0.021(3) 0.031(3) 0.012(3) 0.000(2) 0.005(2) -0.009(2) 
C57 0.035(3) 0.031(3) 0.025(3) -0.006(2) 0.016(3) -0.014(2) 
C58 0.013(3) 0.051(4) 0.029(3) 0.012(3) 0.006(2) -0.001(2) 
C59 0.019(3) 0.023(3) 0.017(3) -0.001(2) 0.011(2) -0.001(2) 
C60 0.026(3) 0.016(2) 0.024(3) 0.000(2) 0.015(2) -0.004(2) 
C61 0.020(3) 0.026(3) 0.030(3) 0.004(2) 0.015(2) -0.003(2) 
C62 0.026(3) 0.014(2) 0.029(3) 0.003(2) 0.019(2) -0.001(2) 
C63 0.023(3) 0.015(2) 0.037(3) -0.002(2) 0.021(3) 0.000(2) 
C64 0.034(3) 0.020(3) 0.060(4) 0.001(3) 0.031(3) 0.007(2) 
C65 0.032(3) 0.023(3) 0.033(3) -0.012(2) 0.024(3) -0.007(2) 
C66 0.034(3) 0.019(3) 0.038(3) -0.005(2) 0.024(3) -0.011(2) 
C67 0.014(2) 0.017(2) 0.021(3) 0.005(2) 0.009(2) 0.0010(18) 
C68 0.013(2) 0.019(2) 0.015(3) -0.0026(19) 0.006(2) -0.0006(18) 
C69 0.017(2) 0.015(2) 0.016(3) 0.0043(19) 0.010(2) 0.0059(18) 
C70 0.012(2) 0.013(2) 0.018(3) 0.0009(19) 0.005(2) 0.0034(18) 
C71 0.015(2) 0.018(2) 0.021(3) -0.001(2) 0.010(2) -0.0013(19) 
C72 0.024(3) 0.023(3) 0.025(3) 0.003(2) 0.014(2) -0.004(2) 
C73 0.036(3) 0.034(3) 0.034(3) 0.001(3) 0.027(3) -0.008(2) 
C74 0.041(4) 0.037(3) 0.037(4) 0.017(3) 0.022(3) 0.007(3) 
C75 0.037(3) 0.033(3) 0.042(4) 0.002(3) 0.029(3) -0.011(2) 
C76 0.025(3) 0.021(3) 0.031(3) 0.002(2) 0.016(3) 0.006(2) 
C77 0.027(3) 0.032(3) 0.041(4) 0.009(3) 0.018(3) 0.013(2) 
C78 0.044(4) 0.016(3) 0.055(4) 0.005(3) 0.033(3) 0.008(2) 
C79 0.031(3) 0.017(3) 0.041(4) 0.001(2) 0.028(3) 0.007(2) 
C80 0.018(3) 0.015(2) 0.021(3) -0.001(2) 0.008(2) -0.0012(19) 
C81 0.021(3) 0.017(2) 0.020(3) -0.002(2) 0.011(2) -0.0054(19) 
C82 0.033(3) 0.027(3) 0.028(3) -0.009(2) 0.018(3) -0.010(2) 
C83 0.024(3) 0.020(3) 0.022(3) 0.004(2) 0.006(2) -0.004(2) 
C84 0.016(2) 0.015(2) 0.015(3) -0.0008(19) 0.009(2) 0.0009(18) 
C85 0.012(2) 0.013(2) 0.014(3) -0.0001(18) 0.005(2) 0.0001(17) 
C86 0.017(2) 0.013(2) 0.017(3) 0.0007(19) 0.010(2) 0.0002(18) 
C87 0.015(2) 0.010(2) 0.022(3) -0.0034(19) 0.012(2) -0.0029(17) 
C88 0.028(3) 0.016(3) 0.026(3) -0.002(2) 0.014(2) -0.003(2) 
C89 0.024(3) 0.027(3) 0.032(3) -0.009(2) 0.022(3) -0.005(2) 
C90 0.032(3) 0.019(3) 0.026(3) -0.003(2) 0.021(3) -0.010(2) 
C91 0.032(3) 0.015(2) 0.024(3) 0.001(2) 0.016(2) -0.004(2) 
C92 0.022(3) 0.017(2) 0.022(3) -0.005(2) 0.015(2) -0.0026(19) 
C93 0.016(2) 0.018(2) 0.015(3) -0.0026(19) 0.012(2) -0.0008(18) 
C94 0.019(3) 0.020(3) 0.021(3) -0.005(2) 0.012(2) -0.002(2) 
C95 0.027(3) 0.029(3) 0.029(3) -0.002(2) 0.022(3) -0.006(2) 
C96 0.028(3) 0.024(3) 0.023(3) 0.003(2) 0.015(2) -0.006(2) 
C97 0.026(3) 0.019(3) 0.019(3) 0.004(2) 0.010(2) 0.003(2) 
C98 0.015(2) 0.016(2) 0.017(3) 0.0024(19) 0.009(2) 0.0014(18) 
S1 0.0340(8) 0.0144(6) 0.0281(8) -0.0023(5) 0.0101(7) 0.0046(5) 
S2 0.0242(7) 0.0131(6) 0.0199(7) 0.0018(5) 0.0103(6) 0.0025(5) 
S3 0.0545(9) 0.0195(7) 0.0324(9) -0.0099(6) 0.0303(8) -0.0104(6) 
S4 0.0311(7) 0.0171(6) 0.0266(7) -0.0040(5) 0.0216(6) -0.0040(5) 
Th1 0.01368(9) 0.01312(9) 0.01485(9) -0.00056(7) 0.00703(8) 0.00089(6) 
Th2 0.01322(9) 0.01495(9) 0.01550(9) -0.00136(7) 0.00894(8) -0.00003(6) 
C99 0.096(6) 0.047(4) 0.067(6) 0.012(4) 0.063(5) 0.007(4) 
C104 0.087(6) 0.053(5) 0.067(6) 0.009(4) 0.056(5) -0.003(4) 
C100 0.073(5) 0.070(5) 0.061(5) 0.025(4) 0.050(5) 0.015(4) 
C103 0.051(5) 0.102(7) 0.073(6) -0.009(5) 0.046(5) -0.016(5) 
C101 0.043(5) 0.098(7) 0.067(6) 0.050(5) 0.016(4) 0.011(4) 
C102 0.036(5) 0.094(7) 0.126(10) 0.032(6) 0.032(5) 0.015(4) 
 
_geom_special_details 
; 
 All esds (except the esd in the dihedral angle between two l.s. planes) 
 are estimated using the full covariance matrix.  The cell esds are taken 
 into account individually in the estimation of esds in distances, angles 
 and torsion angles; correlations between esds in cell parameters are only 
 used when they are defined by crystal symmetry.  An approximate (isotropic) 
 treatment of cell esds is used for estimating esds involving l.s. planes. 
; 
 
loop_ 
 _geom_bond_atom_site_label_1 
 _geom_bond_atom_site_label_2 
 _geom_bond_distance 
 _geom_bond_site_symmetry_2 
 _geom_bond_publ_flag 
C1 C5 1.436(6) . ? 
C1 C2 1.443(6) . ? 
C1 C6 1.564(6) . ? 
C1 Th1 2.972(5) . ? 
C2 C3 1.433(6) . ? 
C2 C10 1.564(6) . ? 
C2 Th1 2.950(4) . ? 
C3 C4 1.426(6) . ? 
C3 Th1 2.825(4) . ? 
C3 H3 0.9500 . ? 
C4 C5 1.403(6) . ? 
C4 C14 1.532(6) . ? 
C4 Th1 2.842(4) . ? 
C5 Th1 2.848(4) . ? 
C5 H5 0.9500 . ? 
C6 C7 1.533(6) . ? 
C6 C9 1.543(6) . ? 
C6 C8 1.546(6) . ? 
C7 H7A 0.9800 . ? 
C7 H7B 0.9800 . ? 
C7 H7C 0.9800 . ? 
C8 H8A 0.9800 . ? 
C8 H8B 0.9800 . ? 
C8 H8C 0.9800 . ? 
C9 H9A 0.9800 . ? 
C9 H9B 0.9800 . ? 
C9 H9C 0.9800 . ? 
C10 C13 1.534(7) . ? 
C10 C12 1.543(6) . ? 
C10 C11 1.554(6) . ? 
C11 H11A 0.9800 . ? 
C11 H11B 0.9800 . ? 
C11 H11C 0.9800 . ? 
C12 H12A 0.9800 . ? 
C12 H12B 0.9800 . ? 
C12 H12C 0.9800 . ? 
C13 H13A 0.9800 . ? 
C13 H13B 0.9800 . ? 
C13 H13C 0.9800 . ? 
C14 C17 1.526(7) . ? 
C14 C15 1.536(6) . ? 
C14 C16 1.548(7) . ? 
C15 H15A 0.9800 . ? 
C15 H15B 0.9800 . ? 
C15 H15C 0.9800 . ? 
C16 H16A 0.9800 . ? 
C16 H16B 0.9800 . ? 
C16 H16C 0.9800 . ? 
C17 H17A 0.9800 . ? 
C17 H17B 0.9800 . ? 
C17 H17C 0.9800 . ? 
C18 C19 1.445(7) . ? 
C18 C22 1.445(7) . ? 
C18 C23 1.547(6) . ? 
C18 Th1 2.919(4) . ? 
C19 C20 1.434(6) . ? 
C19 C27 1.531(7) . ? 
C19 Th1 2.877(4) . ? 
C20 C21 1.410(6) . ? 
C20 Th1 2.784(4) . ? 
C20 H20 0.9500 . ? 
C21 C22 1.418(6) . ? 
C21 C31 1.512(6) . ? 
C21 Th1 2.838(4) . ? 
C22 Th1 2.842(4) . ? 
C22 H22 0.9500 . ? 
C23 C24 1.531(7) . ? 
C23 C26 1.548(6) . ? 
C23 C25 1.554(7) . ? 
C24 H24A 0.9800 . ? 
C24 H24B 0.9800 . ? 
C24 H24C 0.9800 . ? 
C25 H25A 0.9800 . ? 
C25 H25B 0.9800 . ? 
C25 H25C 0.9800 . ? 
C26 H26A 0.9800 . ? 
C26 H26B 0.9800 . ? 
C26 H26C 0.9800 . ? 
C27 C28 1.543(7) . ? 
C27 C30 1.549(7) . ? 
C27 C29 1.557(6) . ? 
C28 H28A 0.9800 . ? 
C28 H28B 0.9800 . ? 
C28 H28C 0.9800 . ? 
C29 H29A 0.9800 . ? 
C29 H29B 0.9800 . ? 
C29 H29C 0.9800 . ? 
C30 H30A 0.9800 . ? 
C30 H30B 0.9800 . ? 
C30 H30C 0.9800 . ? 
C31 C34 1.481(7) . ? 
C31 C33 1.519(7) . ? 
C31 C32 1.562(7) . ? 
C32 H32A 0.9800 . ? 
C32 H32B 0.9800 . ? 
C32 H32C 0.9800 . ? 
C33 H33A 0.9800 . ? 
C33 H33B 0.9800 . ? 
C33 H33C 0.9800 . ? 
C34 H34A 0.9800 . ? 
C34 H34B 0.9800 . ? 
C34 H34C 0.9800 . ? 
C35 C36 1.478(6) . ? 
C35 S1 1.658(5) . ? 
C35 S2 1.752(5) . ? 
C36 C37 1.363(6) . ? 
C36 C38 1.511(7) . ? 
C37 C44 1.500(6) . ? 
C37 Th1 2.549(5) . ? 
C38 C43 1.386(6) . ? 
C38 C39 1.388(7) . ? 
C39 C40 1.385(7) . ? 
C39 H39 0.9500 . ? 
C40 C41 1.378(7) . ? 
C40 H40 0.9500 . ? 
C41 C42 1.385(8) . ? 
C41 H41 0.9500 . ? 
C42 C43 1.401(7) . ? 
C42 H42 0.9500 . ? 
C43 H43 0.9500 . ? 
C44 C49 1.397(6) . ? 
C44 C45 1.400(7) . ? 
C45 C46 1.390(7) . ? 
C45 H45 0.9500 . ? 
C46 C47 1.381(7) . ? 
C46 H46 0.9500 . ? 
C47 C48 1.386(8) . ? 
C47 H47 0.9500 . ? 
C48 C49 1.384(7) . ? 
C48 H48 0.9500 . ? 
C49 H49 0.9500 . ? 
C50 C54 1.427(6) . ? 
C50 C51 1.454(6) . ? 
C50 C55 1.548(7) . ? 
C50 Th2 2.956(4) . ? 
C51 C52 1.426(6) . ? 
C51 C59 1.572(6) . ? 
C51 Th2 2.951(4) . ? 
C52 C53 1.413(6) . ? 
C52 Th2 2.823(4) . ? 
C52 H52 0.9500 . ? 
C53 C54 1.395(6) . ? 
C53 C63 1.521(6) . ? 
C53 Th2 2.793(4) . ? 
C54 Th2 2.816(4) . ? 
C54 H54 0.9500 . ? 
C55 C58 1.535(6) . ? 
C55 C56 1.545(6) . ? 
C55 C57 1.550(6) . ? 
C56 H56A 0.9800 . ? 
C56 H56B 0.9800 . ? 
C56 H56C 0.9800 . ? 
C57 H57A 0.9800 . ? 
C57 H57B 0.9800 . ? 
C57 H57C 0.9800 . ? 
C58 H58A 0.9800 . ? 
C58 H58B 0.9800 . ? 
C58 H58C 0.9800 . ? 
C59 C61 1.538(6) . ? 
C59 C62 1.542(7) . ? 
C59 C60 1.548(6) . ? 
C60 H60A 0.9800 . ? 
C60 H60B 0.9800 . ? 
C60 H60C 0.9800 . ? 
C61 H61A 0.9800 . ? 
C61 H61B 0.9800 . ? 
C61 H61C 0.9800 . ? 
C62 H62A 0.9800 . ? 
C62 H62B 0.9800 . ? 
C62 H62C 0.9800 . ? 
C63 C65 1.528(7) . ? 
C63 C64 1.532(6) . ? 
C63 C66 1.555(6) . ? 
C64 H64A 0.9800 . ? 
C64 H64B 0.9800 . ? 
C64 H64C 0.9800 . ? 
C65 H65A 0.9800 . ? 
C65 H65B 0.9800 . ? 
C65 H65C 0.9800 . ? 
C66 H66A 0.9800 . ? 
C66 H66B 0.9800 . ? 
C66 H66C 0.9800 . ? 
C67 C71 1.418(6) . ? 
C67 C68 1.448(6) . ? 
C67 C72 1.538(6) . ? 
C67 Th2 2.833(5) . ? 
C68 C69 1.424(6) . ? 
C68 C76 1.552(6) . ? 
C68 Th2 2.873(4) . ? 
C69 C70 1.406(6) . ? 
C69 Th2 2.807(4) . ? 
C69 H69 0.9500 . ? 
C70 C71 1.398(6) . ? 
C70 C80 1.551(6) . ? 
C70 Th2 2.885(4) . ? 
C71 Th2 2.820(5) . ? 
C71 H71 0.9500 . ? 
C72 C75 1.535(7) . ? 
C72 C74 1.536(7) . ? 
C72 C73 1.554(7) . ? 
C73 H73A 0.9800 . ? 
C73 H73B 0.9800 . ? 
C73 H73C 0.9800 . ? 
C74 H74A 0.9800 . ? 
C74 H74B 0.9800 . ? 
C74 H74C 0.9800 . ? 
C75 H75A 0.9800 . ? 
C75 H75B 0.9800 . ? 
C75 H75C 0.9800 . ? 
C76 C79 1.530(7) . ? 
C76 C78 1.552(6) . ? 
C76 C77 1.564(7) . ? 
C77 H77A 0.9800 . ? 
C77 H77B 0.9800 . ? 
C77 H77C 0.9800 . ? 
C78 H78A 0.9800 . ? 
C78 H78B 0.9800 . ? 
C78 H78C 0.9800 . ? 
C79 H79A 0.9800 . ? 
C79 H79B 0.9800 . ? 
C79 H79C 0.9800 . ? 
C80 C82 1.530(7) . ? 
C80 C81 1.532(6) . ? 
C80 C83 1.559(6) . ? 
C81 H81A 0.9800 . ? 
C81 H81B 0.9800 . ? 
C81 H81C 0.9800 . ? 
C82 H82A 0.9800 . ? 
C82 H82B 0.9800 . ? 
C82 H82C 0.9800 . ? 
C83 H83A 0.9800 . ? 
C83 H83B 0.9800 . ? 
C83 H83C 0.9800 . ? 
C84 C85 1.490(6) . ? 
C84 S3 1.651(5) . ? 
C84 S4 1.751(5) . ? 
C85 C86 1.359(6) . ? 
C85 C87 1.500(6) . ? 
C86 C93 1.486(6) . ? 
C86 Th2 2.525(5) . ? 
C87 C88 1.390(6) . ? 
C87 C92 1.400(6) . ? 
C88 C89 1.394(7) . ? 
C88 H88 0.9500 . ? 
C89 C90 1.397(7) . ? 
C89 H89 0.9500 . ? 
C90 C91 1.381(6) . ? 
C90 H90 0.9500 . ? 
C91 C92 1.376(7) . ? 
C91 H91 0.9500 . ? 
C92 H92 0.9500 . ? 
C93 C94 1.397(6) . ? 
C93 C98 1.411(6) . ? 
C94 C95 1.372(6) . ? 
C94 H94 0.9500 . ? 
C95 C96 1.397(6) . ? 
C95 H95 0.9500 . ? 
C96 C97 1.389(6) . ? 
C96 H96 0.9500 . ? 
C97 C98 1.387(6) . ? 
C97 H97 0.9500 . ? 
C98 H98 0.9500 . ? 
S2 Th1 2.7660(12) . ? 
S4 Th2 2.7550(12) . ? 
C99 C104 1.365(9) . ? 
C99 C100 1.391(9) . ? 
C99 H99 0.9500 . ? 
C104 C103 1.379(9) . ? 
C104 H104 0.9500 . ? 
C100 C101 1.331(9) . ? 
C100 H100 0.9500 . ? 
C103 C102 1.388(11) . ? 
C103 H103 0.9500 . ? 
C101 C102 1.399(12) . ? 
C101 H101 0.9500 . ? 
C102 H102 0.9500 . ? 
 
loop_ 
 _geom_angle_atom_site_label_1 
 _geom_angle_atom_site_label_2 
 _geom_angle_atom_site_label_3 
 _geom_angle 
 _geom_angle_site_symmetry_1 
 _geom_angle_site_symmetry_3 
 _geom_angle_publ_flag 
C5 C1 C2 106.1(4) . . ? 
C5 C1 C6 119.5(4) . . ? 
C2 C1 C6 132.4(4) . . ? 
C5 C1 Th1 70.9(2) . . ? 
C2 C1 Th1 75.0(3) . . ? 
C6 C1 Th1 130.5(3) . . ? 
C3 C2 C1 106.8(4) . . ? 
C3 C2 C10 117.0(4) . . ? 
C1 C2 C10 134.1(4) . . ? 
C3 C2 Th1 70.9(2) . . ? 
C1 C2 Th1 76.8(3) . . ? 
C10 C2 Th1 129.3(3) . . ? 
C4 C3 C2 110.1(4) . . ? 
C4 C3 Th1 76.1(2) . . ? 
C2 C3 Th1 80.5(2) . . ? 
C4 C3 H3 124.9 . . ? 
C2 C3 H3 124.9 . . ? 
Th1 C3 H3 110.7 . . ? 
C5 C4 C3 105.8(4) . . ? 
C5 C4 C14 124.9(4) . . ? 
C3 C4 C14 125.3(4) . . ? 
C5 C4 Th1 76.0(2) . . ? 
C3 C4 Th1 74.8(2) . . ? 
C14 C4 Th1 132.5(3) . . ? 
C4 C5 C1 111.1(4) . . ? 
C4 C5 Th1 75.5(3) . . ? 
C1 C5 Th1 80.6(3) . . ? 
C4 C5 H5 124.5 . . ? 
C1 C5 H5 124.5 . . ? 
Th1 C5 H5 111.5 . . ? 
C7 C6 C9 108.2(4) . . ? 
C7 C6 C8 105.4(4) . . ? 
C9 C6 C8 109.4(4) . . ? 
C7 C6 C1 110.9(4) . . ? 
C9 C6 C1 114.9(4) . . ? 
C8 C6 C1 107.7(4) . . ? 
C6 C7 H7A 109.5 . . ? 
C6 C7 H7B 109.5 . . ? 
H7A C7 H7B 109.5 . . ? 
C6 C7 H7C 109.5 . . ? 
H7A C7 H7C 109.5 . . ? 
H7B C7 H7C 109.5 . . ? 
C6 C8 H8A 109.5 . . ? 
C6 C8 H8B 109.5 . . ? 
H8A C8 H8B 109.5 . . ? 
C6 C8 H8C 109.5 . . ? 
H8A C8 H8C 109.5 . . ? 
H8B C8 H8C 109.5 . . ? 
C6 C9 H9A 109.5 . . ? 
C6 C9 H9B 109.5 . . ? 
H9A C9 H9B 109.5 . . ? 
C6 C9 H9C 109.5 . . ? 
H9A C9 H9C 109.5 . . ? 
H9B C9 H9C 109.5 . . ? 
C13 C10 C12 106.1(4) . . ? 
C13 C10 C11 107.6(4) . . ? 
C12 C10 C11 108.9(4) . . ? 
C13 C10 C2 111.0(4) . . ? 
C12 C10 C2 116.9(4) . . ? 
C11 C10 C2 106.0(4) . . ? 
C10 C11 H11A 109.5 . . ? 
C10 C11 H11B 109.5 . . ? 
H11A C11 H11B 109.5 . . ? 
C10 C11 H11C 109.5 . . ? 
H11A C11 H11C 109.5 . . ? 
H11B C11 H11C 109.5 . . ? 
C10 C12 H12A 109.5 . . ? 
C10 C12 H12B 109.5 . . ? 
H12A C12 H12B 109.5 . . ? 
C10 C12 H12C 109.5 . . ? 
H12A C12 H12C 109.5 . . ? 
H12B C12 H12C 109.5 . . ? 
C10 C13 H13A 109.5 . . ? 
C10 C13 H13B 109.5 . . ? 
H13A C13 H13B 109.5 . . ? 
C10 C13 H13C 109.5 . . ? 
H13A C13 H13C 109.5 . . ? 
H13B C13 H13C 109.5 . . ? 
C17 C14 C4 113.7(4) . . ? 
C17 C14 C15 112.1(4) . . ? 
C4 C14 C15 113.1(4) . . ? 
C17 C14 C16 106.4(4) . . ? 
C4 C14 C16 103.9(4) . . ? 
C15 C14 C16 106.8(4) . . ? 
C14 C15 H15A 109.5 . . ? 
C14 C15 H15B 109.5 . . ? 
H15A C15 H15B 109.5 . . ? 
C14 C15 H15C 109.5 . . ? 
H15A C15 H15C 109.5 . . ? 
H15B C15 H15C 109.5 . . ? 
C14 C16 H16A 109.5 . . ? 
C14 C16 H16B 109.5 . . ? 
H16A C16 H16B 109.5 . . ? 
C14 C16 H16C 109.5 . . ? 
H16A C16 H16C 109.5 . . ? 
H16B C16 H16C 109.5 . . ? 
C14 C17 H17A 109.5 . . ? 
C14 C17 H17B 109.5 . . ? 
H17A C17 H17B 109.5 . . ? 
C14 C17 H17C 109.5 . . ? 
H17A C17 H17C 109.5 . . ? 
H17B C17 H17C 109.5 . . ? 
C19 C18 C22 106.0(4) . . ? 
C19 C18 C23 134.2(4) . . ? 
C22 C18 C23 117.2(4) . . ? 
C19 C18 Th1 74.0(2) . . ? 
C22 C18 Th1 72.6(2) . . ? 
C23 C18 Th1 131.9(3) . . ? 
C20 C19 C18 107.0(4) . . ? 
C20 C19 C27 120.2(4) . . ? 
C18 C19 C27 132.7(4) . . ? 
C20 C19 Th1 71.8(2) . . ? 
C18 C19 Th1 77.2(3) . . ? 
C27 C19 Th1 118.6(3) . . ? 
C21 C20 C19 110.3(4) . . ? 
C21 C20 Th1 77.6(2) . . ? 
C19 C20 Th1 78.9(2) . . ? 
C21 C20 H20 124.9 . . ? 
C19 C20 H20 124.9 . . ? 
Th1 C20 H20 110.8 . . ? 
C20 C21 C22 106.3(4) . . ? 
C20 C21 C31 127.5(4) . . ? 
C22 C21 C31 126.2(4) . . ? 
C20 C21 Th1 73.4(2) . . ? 
C22 C21 Th1 75.7(2) . . ? 
C31 C21 Th1 117.6(3) . . ? 
C21 C22 C18 110.2(4) . . ? 
C21 C22 Th1 75.4(2) . . ? 
C18 C22 Th1 78.4(2) . . ? 
C21 C22 H22 124.9 . . ? 
C18 C22 H22 124.9 . . ? 
Th1 C22 H22 113.3 . . ? 
C24 C23 C18 117.0(4) . . ? 
C24 C23 C26 108.3(4) . . ? 
C18 C23 C26 106.0(4) . . ? 
C24 C23 C25 106.0(4) . . ? 
C18 C23 C25 111.7(4) . . ? 
C26 C23 C25 107.5(4) . . ? 
C23 C24 H24A 109.5 . . ? 
C23 C24 H24B 109.5 . . ? 
H24A C24 H24B 109.5 . . ? 
C23 C24 H24C 109.5 . . ? 
H24A C24 H24C 109.5 . . ? 
H24B C24 H24C 109.5 . . ? 
C23 C25 H25A 109.5 . . ? 
C23 C25 H25B 109.5 . . ? 
H25A C25 H25B 109.5 . . ? 
C23 C25 H25C 109.5 . . ? 
H25A C25 H25C 109.5 . . ? 
H25B C25 H25C 109.5 . . ? 
C23 C26 H26A 109.5 . . ? 
C23 C26 H26B 109.5 . . ? 
H26A C26 H26B 109.5 . . ? 
C23 C26 H26C 109.5 . . ? 
H26A C26 H26C 109.5 . . ? 
H26B C26 H26C 109.5 . . ? 
C19 C27 C28 110.6(4) . . ? 
C19 C27 C30 111.3(4) . . ? 
C28 C27 C30 106.3(4) . . ? 
C19 C27 C29 111.2(4) . . ? 
C28 C27 C29 111.4(4) . . ? 
C30 C27 C29 106.0(4) . . ? 
C27 C28 H28A 109.5 . . ? 
C27 C28 H28B 109.5 . . ? 
H28A C28 H28B 109.5 . . ? 
C27 C28 H28C 109.5 . . ? 
H28A C28 H28C 109.5 . . ? 
H28B C28 H28C 109.5 . . ? 
C27 C29 H29A 109.5 . . ? 
C27 C29 H29B 109.5 . . ? 
H29A C29 H29B 109.5 . . ? 
C27 C29 H29C 109.5 . . ? 
H29A C29 H29C 109.5 . . ? 
H29B C29 H29C 109.5 . . ? 
C27 C30 H30A 109.5 . . ? 
C27 C30 H30B 109.5 . . ? 
H30A C30 H30B 109.5 . . ? 
C27 C30 H30C 109.5 . . ? 
H30A C30 H30C 109.5 . . ? 
H30B C30 H30C 109.5 . . ? 
C34 C31 C21 112.6(4) . . ? 
C34 C31 C33 111.3(4) . . ? 
C21 C31 C33 111.9(4) . . ? 
C34 C31 C32 108.7(5) . . ? 
C21 C31 C32 105.5(4) . . ? 
C33 C31 C32 106.4(4) . . ? 
C31 C32 H32A 109.5 . . ? 
C31 C32 H32B 109.5 . . ? 
H32A C32 H32B 109.5 . . ? 
C31 C32 H32C 109.5 . . ? 
H32A C32 H32C 109.5 . . ? 
H32B C32 H32C 109.5 . . ? 
C31 C33 H33A 109.5 . . ? 
C31 C33 H33B 109.5 . . ? 
H33A C33 H33B 109.5 . . ? 
C31 C33 H33C 109.5 . . ? 
H33A C33 H33C 109.5 . . ? 
H33B C33 H33C 109.5 . . ? 
C31 C34 H34A 109.5 . . ? 
C31 C34 H34B 109.5 . . ? 
H34A C34 H34B 109.5 . . ? 
C31 C34 H34C 109.5 . . ? 
H34A C34 H34C 109.5 . . ? 
H34B C34 H34C 109.5 . . ? 
C36 C35 S1 120.8(4) . . ? 
C36 C35 S2 120.1(3) . . ? 
S1 C35 S2 119.1(3) . . ? 
C37 C36 C35 120.9(5) . . ? 
C37 C36 C38 122.2(4) . . ? 
C35 C36 C38 116.9(4) . . ? 
C36 C37 C44 117.5(4) . . ? 
C36 C37 Th1 123.4(3) . . ? 
C44 C37 Th1 119.0(3) . . ? 
C43 C38 C39 118.9(5) . . ? 
C43 C38 C36 119.8(4) . . ? 
C39 C38 C36 121.2(4) . . ? 
C40 C39 C38 121.4(5) . . ? 
C40 C39 H39 119.3 . . ? 
C38 C39 H39 119.3 . . ? 
C41 C40 C39 119.5(5) . . ? 
C41 C40 H40 120.3 . . ? 
C39 C40 H40 120.3 . . ? 
C40 C41 C42 120.2(5) . . ? 
C40 C41 H41 119.9 . . ? 
C42 C41 H41 119.9 . . ? 
C41 C42 C43 120.0(5) . . ? 
C41 C42 H42 120.0 . . ? 
C43 C42 H42 120.0 . . ? 
C38 C43 C42 120.0(5) . . ? 
C38 C43 H43 120.0 . . ? 
C42 C43 H43 120.0 . . ? 
C49 C44 C45 117.1(4) . . ? 
C49 C44 C37 121.3(4) . . ? 
C45 C44 C37 121.5(4) . . ? 
C46 C45 C44 121.9(5) . . ? 
C46 C45 H45 119.1 . . ? 
C44 C45 H45 119.1 . . ? 
C47 C46 C45 120.2(5) . . ? 
C47 C46 H46 119.9 . . ? 
C45 C46 H46 119.9 . . ? 
C46 C47 C48 118.5(5) . . ? 
C46 C47 H47 120.7 . . ? 
C48 C47 H47 120.7 . . ? 
C49 C48 C47 121.6(5) . . ? 
C49 C48 H48 119.2 . . ? 
C47 C48 H48 119.2 . . ? 
C48 C49 C44 120.7(5) . . ? 
C48 C49 H49 119.7 . . ? 
C44 C49 H49 119.7 . . ? 
C54 C50 C51 105.0(4) . . ? 
C54 C50 C55 118.4(4) . . ? 
C51 C50 C55 134.9(4) . . ? 
C54 C50 Th2 70.3(2) . . ? 
C51 C50 Th2 75.6(2) . . ? 
C55 C50 Th2 128.8(3) . . ? 
C52 C51 C50 107.2(4) . . ? 
C52 C51 C59 119.6(4) . . ? 
C50 C51 C59 131.1(4) . . ? 
C52 C51 Th2 70.8(2) . . ? 
C50 C51 Th2 75.9(2) . . ? 
C59 C51 Th2 131.0(3) . . ? 
C53 C52 C51 109.9(4) . . ? 
C53 C52 Th2 74.2(2) . . ? 
C51 C52 Th2 80.7(2) . . ? 
C53 C52 H52 125.1 . . ? 
C51 C52 H52 125.1 . . ? 
Th2 C52 H52 112.1 . . ? 
C54 C53 C52 106.1(4) . . ? 
C54 C53 C63 126.3(4) . . ? 
C52 C53 C63 126.1(4) . . ? 
C54 C53 Th2 76.5(2) . . ? 
C52 C53 Th2 76.6(2) . . ? 
C63 C53 Th2 123.5(3) . . ? 
C53 C54 C50 111.8(4) . . ? 
C53 C54 Th2 74.7(2) . . ? 
C50 C54 Th2 81.2(2) . . ? 
C53 C54 H54 124.1 . . ? 
C50 C54 H54 124.1 . . ? 
Th2 C54 H54 111.9 . . ? 
C58 C55 C56 107.1(4) . . ? 
C58 C55 C50 106.8(4) . . ? 
C56 C55 C50 110.5(4) . . ? 
C58 C55 C57 109.4(4) . . ? 
C56 C55 C57 104.9(4) . . ? 
C50 C55 C57 117.8(4) . . ? 
C55 C56 H56A 109.5 . . ? 
C55 C56 H56B 109.5 . . ? 
H56A C56 H56B 109.5 . . ? 
C55 C56 H56C 109.5 . . ? 
H56A C56 H56C 109.5 . . ? 
H56B C56 H56C 109.5 . . ? 
C55 C57 H57A 109.5 . . ? 
C55 C57 H57B 109.5 . . ? 
H57A C57 H57B 109.5 . . ? 
C55 C57 H57C 109.5 . . ? 
H57A C57 H57C 109.5 . . ? 
H57B C57 H57C 109.5 . . ? 
C55 C58 H58A 109.5 . . ? 
C55 C58 H58B 109.5 . . ? 
H58A C58 H58B 109.5 . . ? 
C55 C58 H58C 109.5 . . ? 
H58A C58 H58C 109.5 . . ? 
H58B C58 H58C 109.5 . . ? 
C61 C59 C62 106.1(4) . . ? 
C61 C59 C60 110.1(4) . . ? 
C62 C59 C60 106.7(4) . . ? 
C61 C59 C51 108.4(4) . . ? 
C62 C59 C51 110.5(4) . . ? 
C60 C59 C51 114.6(4) . . ? 
C59 C60 H60A 109.5 . . ? 
C59 C60 H60B 109.5 . . ? 
H60A C60 H60B 109.5 . . ? 
C59 C60 H60C 109.5 . . ? 
H60A C60 H60C 109.5 . . ? 
H60B C60 H60C 109.5 . . ? 
C59 C61 H61A 109.5 . . ? 
C59 C61 H61B 109.5 . . ? 
H61A C61 H61B 109.5 . . ? 
C59 C61 H61C 109.5 . . ? 
H61A C61 H61C 109.5 . . ? 
H61B C61 H61C 109.5 . . ? 
C59 C62 H62A 109.5 . . ? 
C59 C62 H62B 109.5 . . ? 
H62A C62 H62B 109.5 . . ? 
C59 C62 H62C 109.5 . . ? 
H62A C62 H62C 109.5 . . ? 
H62B C62 H62C 109.5 . . ? 
C53 C63 C65 111.4(4) . . ? 
C53 C63 C64 108.1(4) . . ? 
C65 C63 C64 108.4(4) . . ? 
C53 C63 C66 110.6(4) . . ? 
C65 C63 C66 110.8(4) . . ? 
C64 C63 C66 107.5(4) . . ? 
C63 C64 H64A 109.5 . . ? 
C63 C64 H64B 109.5 . . ? 
H64A C64 H64B 109.5 . . ? 
C63 C64 H64C 109.5 . . ? 
H64A C64 H64C 109.5 . . ? 
H64B C64 H64C 109.5 . . ? 
C63 C65 H65A 109.5 . . ? 
C63 C65 H65B 109.5 . . ? 
H65A C65 H65B 109.5 . . ? 
C63 C65 H65C 109.5 . . ? 
H65A C65 H65C 109.5 . . ? 
H65B C65 H65C 109.5 . . ? 
C63 C66 H66A 109.5 . . ? 
C63 C66 H66B 109.5 . . ? 
H66A C66 H66B 109.5 . . ? 
C63 C66 H66C 109.5 . . ? 
H66A C66 H66C 109.5 . . ? 
H66B C66 H66C 109.5 . . ? 
C71 C67 C68 106.5(4) . . ? 
C71 C67 C72 121.2(4) . . ? 
C68 C67 C72 132.1(4) . . ? 
C71 C67 Th2 75.0(3) . . ? 
C68 C67 Th2 76.8(3) . . ? 
C72 C67 Th2 118.4(3) . . ? 
C69 C68 C67 105.6(4) . . ? 
C69 C68 C76 117.8(4) . . ? 
C67 C68 C76 134.5(4) . . ? 
C69 C68 Th2 72.9(2) . . ? 
C67 C68 Th2 73.8(2) . . ? 
C76 C68 Th2 130.4(3) . . ? 
C70 C69 C68 110.9(4) . . ? 
C70 C69 Th2 78.8(2) . . ? 
C68 C69 Th2 78.1(2) . . ? 
C70 C69 H69 124.5 . . ? 
C68 C69 H69 124.5 . . ? 
Th2 C69 H69 110.7 . . ? 
C71 C70 C69 105.6(4) . . ? 
C71 C70 C80 127.1(4) . . ? 
C69 C70 C80 123.0(4) . . ? 
C71 C70 Th2 73.2(3) . . ? 
C69 C70 Th2 72.6(3) . . ? 
C80 C70 Th2 137.2(3) . . ? 
C70 C71 C67 111.0(4) . . ? 
C70 C71 Th2 78.4(3) . . ? 
C67 C71 Th2 76.0(3) . . ? 
C70 C71 H71 124.5 . . ? 
C67 C71 H71 124.5 . . ? 
Th2 C71 H71 113.0 . . ? 
C75 C72 C74 111.8(4) . . ? 
C75 C72 C67 111.1(4) . . ? 
C74 C72 C67 111.4(4) . . ? 
C75 C72 C73 106.0(4) . . ? 
C74 C72 C73 105.7(5) . . ? 
C67 C72 C73 110.6(4) . . ? 
C72 C73 H73A 109.5 . . ? 
C72 C73 H73B 109.5 . . ? 
H73A C73 H73B 109.5 . . ? 
C72 C73 H73C 109.5 . . ? 
H73A C73 H73C 109.5 . . ? 
H73B C73 H73C 109.5 . . ? 
C72 C74 H74A 109.5 . . ? 
C72 C74 H74B 109.5 . . ? 
H74A C74 H74B 109.5 . . ? 
C72 C74 H74C 109.5 . . ? 
H74A C74 H74C 109.5 . . ? 
H74B C74 H74C 109.5 . . ? 
C72 C75 H75A 109.5 . . ? 
C72 C75 H75B 109.5 . . ? 
H75A C75 H75B 109.5 . . ? 
C72 C75 H75C 109.5 . . ? 
H75A C75 H75C 109.5 . . ? 
H75B C75 H75C 109.5 . . ? 
C79 C76 C68 112.1(4) . . ? 
C79 C76 C78 105.8(4) . . ? 
C68 C76 C78 118.9(4) . . ? 
C79 C76 C77 107.7(4) . . ? 
C68 C76 C77 104.3(4) . . ? 
C78 C76 C77 107.5(4) . . ? 
C76 C77 H77A 109.5 . . ? 
C76 C77 H77B 109.5 . . ? 
H77A C77 H77B 109.5 . . ? 
C76 C77 H77C 109.5 . . ? 
H77A C77 H77C 109.5 . . ? 
H77B C77 H77C 109.5 . . ? 
C76 C78 H78A 109.5 . . ? 
C76 C78 H78B 109.5 . . ? 
H78A C78 H78B 109.5 . . ? 
C76 C78 H78C 109.5 . . ? 
H78A C78 H78C 109.5 . . ? 
H78B C78 H78C 109.5 . . ? 
C76 C79 H79A 109.5 . . ? 
C76 C79 H79B 109.5 . . ? 
H79A C79 H79B 109.5 . . ? 
C76 C79 H79C 109.5 . . ? 
H79A C79 H79C 109.5 . . ? 
H79B C79 H79C 109.5 . . ? 
C82 C80 C81 109.9(4) . . ? 
C82 C80 C70 113.5(4) . . ? 
C81 C80 C70 113.4(4) . . ? 
C82 C80 C83 107.0(4) . . ? 
C81 C80 C83 108.8(4) . . ? 
C70 C80 C83 103.9(4) . . ? 
C80 C81 H81A 109.5 . . ? 
C80 C81 H81B 109.5 . . ? 
H81A C81 H81B 109.5 . . ? 
C80 C81 H81C 109.5 . . ? 
H81A C81 H81C 109.5 . . ? 
H81B C81 H81C 109.5 . . ? 
C80 C82 H82A 109.5 . . ? 
C80 C82 H82B 109.5 . . ? 
H82A C82 H82B 109.5 . . ? 
C80 C82 H82C 109.5 . . ? 
H82A C82 H82C 109.5 . . ? 
H82B C82 H82C 109.5 . . ? 
C80 C83 H83A 109.5 . . ? 
C80 C83 H83B 109.5 . . ? 
H83A C83 H83B 109.5 . . ? 
C80 C83 H83C 109.5 . . ? 
H83A C83 H83C 109.5 . . ? 
H83B C83 H83C 109.5 . . ? 
C85 C84 S3 122.1(3) . . ? 
C85 C84 S4 119.4(3) . . ? 
S3 C84 S4 118.5(3) . . ? 
C86 C85 C84 120.7(4) . . ? 
C86 C85 C87 123.6(4) . . ? 
C84 C85 C87 115.6(4) . . ? 
C85 C86 C93 119.7(4) . . ? 
C85 C86 Th2 123.8(3) . . ? 
C93 C86 Th2 116.5(3) . . ? 
C88 C87 C92 118.0(4) . . ? 
C88 C87 C85 121.6(4) . . ? 
C92 C87 C85 120.4(4) . . ? 
C87 C88 C89 120.7(5) . . ? 
C87 C88 H88 119.6 . . ? 
C89 C88 H88 119.6 . . ? 
C88 C89 C90 120.2(5) . . ? 
C88 C89 H89 119.9 . . ? 
C90 C89 H89 119.9 . . ? 
C91 C90 C89 119.1(5) . . ? 
C91 C90 H90 120.4 . . ? 
C89 C90 H90 120.4 . . ? 
C92 C91 C90 120.5(5) . . ? 
C92 C91 H91 119.7 . . ? 
C90 C91 H91 119.7 . . ? 
C91 C92 C87 121.4(4) . . ? 
C91 C92 H92 119.3 . . ? 
C87 C92 H92 119.3 . . ? 
C94 C93 C98 116.2(4) . . ? 
C94 C93 C86 123.9(4) . . ? 
C98 C93 C86 119.9(4) . . ? 
C95 C94 C93 122.1(4) . . ? 
C95 C94 H94 119.0 . . ? 
C93 C94 H94 119.0 . . ? 
C94 C95 C96 120.9(4) . . ? 
C94 C95 H95 119.6 . . ? 
C96 C95 H95 119.6 . . ? 
C97 C96 C95 118.8(4) . . ? 
C97 C96 H96 120.6 . . ? 
C95 C96 H96 120.6 . . ? 
C98 C97 C96 119.7(4) . . ? 
C98 C97 H97 120.1 . . ? 
C96 C97 H97 120.1 . . ? 
C97 C98 C93 122.4(4) . . ? 
C97 C98 H98 118.8 . . ? 
C93 C98 H98 118.8 . . ? 
C35 S2 Th1 104.60(16) . . ? 
C84 S4 Th2 104.72(15) . . ? 
C37 Th1 S2 70.57(11) . . ? 
C37 Th1 C20 124.14(14) . . ? 
S2 Th1 C20 123.72(9) . . ? 
C37 Th1 C3 89.61(14) . . ? 
S2 Th1 C3 105.46(10) . . ? 
C20 Th1 C3 126.29(13) . . ? 
C37 Th1 C21 96.20(14) . . ? 
S2 Th1 C21 126.60(9) . . ? 
C20 Th1 C21 29.03(13) . . ? 
C3 Th1 C21 126.55(13) . . ? 
C37 Th1 C4 114.75(14) . . ? 
S2 Th1 C4 126.19(9) . . ? 
C20 Th1 C4 98.13(13) . . ? 
C3 Th1 C4 29.15(12) . . ? 
C21 Th1 C4 106.61(13) . . ? 
C37 Th1 C22 78.80(14) . . ? 
S2 Th1 C22 98.69(9) . . ? 
C20 Th1 C22 47.44(13) . . ? 
C3 Th1 C22 147.98(13) . . ? 
C21 Th1 C22 28.92(12) . . ? 
C4 Th1 C22 135.09(13) . . ? 
C37 Th1 C5 135.82(13) . . ? 
S2 Th1 C5 109.13(9) . . ? 
C20 Th1 C5 93.69(13) . . ? 
C3 Th1 C5 46.85(13) . . ? 
C21 Th1 C5 114.63(13) . . ? 
C4 Th1 C5 28.54(13) . . ? 
C22 Th1 C5 140.92(13) . . ? 
C37 Th1 C19 122.21(14) . . ? 
S2 Th1 C19 94.65(9) . . ? 
C20 Th1 C19 29.29(12) . . ? 
C3 Th1 C19 146.90(14) . . ? 
C21 Th1 C19 48.21(13) . . ? 
C4 Th1 C19 118.30(13) . . ? 
C22 Th1 C19 47.59(14) . . ? 
C5 Th1 C19 101.97(13) . . ? 
C37 Th1 C18 93.68(14) . . ? 
S2 Th1 C18 80.39(9) . . ? 
C20 Th1 C18 47.82(13) . . ? 
C3 Th1 C18 174.01(13) . . ? 
C21 Th1 C18 48.11(12) . . ? 
C4 Th1 C18 145.43(13) . . ? 
C22 Th1 C18 29.01(13) . . ? 
C5 Th1 C18 130.39(14) . . ? 
C19 Th1 C18 28.86(13) . . ? 
C37 Th1 C2 92.39(14) . . ? 
S2 Th1 C2 79.57(9) . . ? 
C20 Th1 C2 140.41(13) . . ? 
C3 Th1 C2 28.62(12) . . ? 
C21 Th1 C2 153.83(12) . . ? 
C4 Th1 C2 47.69(12) . . ? 
C22 Th1 C2 171.06(14) . . ? 
C5 Th1 C2 46.74(13) . . ? 
C19 Th1 C2 141.05(13) . . ? 
C18 Th1 C2 155.75(13) . . ? 
C37 Th1 C1 119.06(13) . . ? 
S2 Th1 C1 81.84(9) . . ? 
C20 Th1 C1 116.49(13) . . ? 
C3 Th1 C1 46.84(13) . . ? 
C21 Th1 C1 141.86(13) . . ? 
C4 Th1 C1 47.41(13) . . ? 
C22 Th1 C1 160.60(13) . . ? 
C5 Th1 C1 28.47(12) . . ? 
C19 Th1 C1 113.01(13) . . ? 
C18 Th1 C1 134.36(13) . . ? 
C2 Th1 C1 28.21(12) . . ? 
C86 Th2 S4 70.94(10) . . ? 
C86 Th2 C53 115.01(14) . . ? 
S4 Th2 C53 127.13(10) . . ? 
C86 Th2 C69 76.67(14) . . ? 
S4 Th2 C69 101.15(9) . . ? 
C53 Th2 C69 131.72(13) . . ? 
C86 Th2 C54 90.89(14) . . ? 
S4 Th2 C54 105.99(10) . . ? 
C53 Th2 C54 28.80(13) . . ? 
C69 Th2 C54 144.48(12) . . ? 
C86 Th2 C71 122.39(14) . . ? 
S4 Th2 C71 122.82(9) . . ? 
C53 Th2 C71 98.78(14) . . ? 
C69 Th2 C71 46.79(13) . . ? 
C54 Th2 C71 126.80(13) . . ? 
C86 Th2 C52 137.36(14) . . ? 
S4 Th2 C52 110.10(10) . . ? 
C53 Th2 C52 29.15(12) . . ? 
C69 Th2 C52 139.52(14) . . ? 
C54 Th2 C52 46.91(13) . . ? 
C71 Th2 C52 93.71(14) . . ? 
C86 Th2 C67 118.91(14) . . ? 
S4 Th2 C67 93.85(10) . . ? 
C53 Th2 C67 120.32(14) . . ? 
C69 Th2 C67 47.86(13) . . ? 
C54 Th2 C67 148.60(13) . . ? 
C71 Th2 C67 29.06(12) . . ? 
C52 Th2 C67 103.68(14) . . ? 
C86 Th2 C68 89.66(14) . . ? 
S4 Th2 C68 81.20(9) . . ? 
C53 Th2 C68 146.33(14) . . ? 
C69 Th2 C68 29.00(12) . . ? 
C54 Th2 C68 172.56(13) . . ? 
C71 Th2 C68 47.56(13) . . ? 
C52 Th2 C68 132.98(14) . . ? 
C67 Th2 C68 29.39(13) . . ? 
C86 Th2 C70 95.92(14) . . ? 
S4 Th2 C70 127.99(9) . . ? 
C53 Th2 C70 104.33(13) . . ? 
C69 Th2 C70 28.57(12) . . ? 
C54 Th2 C70 124.81(12) . . ? 
C71 Th2 C70 28.34(12) . . ? 
C52 Th2 C70 112.28(13) . . ? 
C67 Th2 C70 47.89(13) . . ? 
C68 Th2 C70 47.77(12) . . ? 
C86 Th2 C51 120.87(14) . . ? 
S4 Th2 C51 82.84(9) . . ? 
C53 Th2 C51 47.64(12) . . ? 
C69 Th2 C51 162.05(13) . . ? 
C54 Th2 C51 46.62(12) . . ? 
C71 Th2 C51 116.46(13) . . ? 
C52 Th2 C51 28.48(13) . . ? 
C67 Th2 C51 114.77(13) . . ? 
C68 Th2 C51 138.08(13) . . ? 
C70 Th2 C51 139.73(13) . . ? 
C86 Th2 C50 93.77(14) . . ? 
S4 Th2 C50 80.17(9) . . ? 
C53 Th2 C50 47.87(13) . . ? 
C69 Th2 C50 169.14(13) . . ? 
C54 Th2 C50 28.50(12) . . ? 
C71 Th2 C50 140.92(13) . . ? 
C52 Th2 C50 47.22(14) . . ? 
C67 Th2 C50 143.00(13) . . ? 
C68 Th2 C50 158.78(12) . . ? 
C70 Th2 C50 151.84(12) . . ? 
C51 Th2 C50 28.50(12) . . ? 
C104 C99 C100 118.3(7) . . ? 
C104 C99 H99 120.8 . . ? 
C100 C99 H99 120.8 . . ? 
C99 C104 C103 121.6(7) . . ? 
C99 C104 H104 119.2 . . ? 
C103 C104 H104 119.2 . . ? 
C101 C100 C99 121.8(7) . . ? 
C101 C100 H100 119.1 . . ? 
C99 C100 H100 119.1 . . ? 
C104 C103 C102 118.7(7) . . ? 
C104 C103 H103 120.6 . . ? 
C102 C103 H103 120.6 . . ? 
C100 C101 C102 120.0(7) . . ? 
C100 C101 H101 120.0 . . ? 
C102 C101 H101 120.0 . . ? 
C103 C102 C101 119.5(7) . . ? 
C103 C102 H102 120.3 . . ? 
C101 C102 H102 120.3 . . ? 
 
_diffrn_measured_fraction_theta_max    0.996 
_diffrn_reflns_theta_full              27.46 
_diffrn_measured_fraction_theta_full   0.996 
_refine_diff_density_max    1.433 
_refine_diff_density_min   -1.198 
_refine_diff_density_rms    0.145 

#===END
 
data_compound5 
  
_audit_creation_method            SHELXL-2014 
_chemical_name_systematic 
; 
 ? 
; 
_chemical_name_common             ? 
_chemical_melting_point           ? 
_chemical_formula_moiety          'C55 H73 N S Th'  
_chemical_formula_sum 
 'C55 H73 N S Th' 
_chemical_formula_weight          1012.24 
  
loop_ 
 _atom_type_symbol 
 _atom_type_description 
 _atom_type_scat_dispersion_real 
 _atom_type_scat_dispersion_imag 
 _atom_type_scat_source 
 'C'  'C'   0.0033   0.0016 
 'International Tables Vol C Tables 4.2.6.8 and 6.1.1.4' 
 'H'  'H'   0.0000   0.0000 
 'International Tables Vol C Tables 4.2.6.8 and 6.1.1.4' 
 'N'  'N'   0.0061   0.0033 
 'International Tables Vol C Tables 4.2.6.8 and 6.1.1.4' 
 'S'  'S'   0.1246   0.1234 
 'International Tables Vol C Tables 4.2.6.8 and 6.1.1.4' 
 'Th'  'Th'  -7.2400   8.8979 
 'International Tables Vol C Tables 4.2.6.8 and 6.1.1.4' 
  
_space_group_crystal_system       monoclinic 
_space_group_IT_number            14 
_space_group_name_H-M_alt         'P 21/n' 
_space_group_name_Hall            '-P 2yn' 
  
_shelx_space_group_comment 
; 
The symmetry employed for this shelxl refinement is uniquely defined 
by the following loop, which should always be used as a source of 
symmetry information in preference to the above space-group names. 
They are only intended as comments. 
; 
  
loop_ 
 _space_group_symop_operation_xyz 
 'x, y, z' 
 '-x+1/2, y+1/2, -z+1/2' 
 '-x, -y, -z' 
 'x-1/2, -y-1/2, z-1/2' 
  
_cell_length_a                    11.7337(6) 
_cell_length_b                    23.9476(12) 
_cell_length_c                    18.4523(10) 
_cell_angle_alpha                 90 
_cell_angle_beta                  90.7960(10) 
_cell_angle_gamma                 90 
_cell_volume                      5184.5(5) 
_cell_formula_units_Z             4 
_cell_measurement_temperature     100(2) 
_cell_measurement_reflns_used     7097 
_cell_measurement_theta_min       2.21 
_cell_measurement_theta_max       27.48 
  
_exptl_crystal_description        block 
_exptl_crystal_colour             yellow 
_exptl_crystal_density_meas       ? 
_exptl_crystal_density_method     ? 
_exptl_crystal_density_diffrn     1.297 
_exptl_crystal_F_000              2064 
_exptl_transmission_factor_min    ? 
_exptl_transmission_factor_max    ? 
_exptl_crystal_size_max           0.150 
_exptl_crystal_size_mid           0.120 
_exptl_crystal_size_min           0.090 
_exptl_absorpt_coefficient_mu     2.950 
_shelx_estimated_absorpt_T_min    0.666 
_shelx_estimated_absorpt_T_max    0.777 
_exptl_absorpt_correction_type    Multi-scan 
_exptl_absorpt_correction_T_min   0.62
_exptl_absorpt_correction_T_max   0.75 
_exptl_absorpt_process_details    SADABS 
  
_exptl_special_details 
; 
 ? 
; 
  
_diffrn_ambient_temperature       100(2) 
_diffrn_radiation_wavelength      0.71073 
_diffrn_radiation_type            MoK\a 
_diffrn_source                    ? 
_diffrn_measurement_device_type   'Bruker APEX-II CCD' 
_diffrn_measurement_method        '\f and \w scans' 
_diffrn_detector_area_resol_mean  ? 
_diffrn_reflns_number             25833 
_diffrn_reflns_av_unetI/netI      0.0501 
_diffrn_reflns_av_R_equivalents   0.0420 
_diffrn_reflns_limit_h_min        -14 
_diffrn_reflns_limit_h_max        11 
_diffrn_reflns_limit_k_min        -28 
_diffrn_reflns_limit_k_max        27 
_diffrn_reflns_limit_l_min        -22 
_diffrn_reflns_limit_l_max        18 
_diffrn_reflns_theta_min          1.933 
_diffrn_reflns_theta_max          25.250 
_diffrn_reflns_theta_full         25.242 
_diffrn_measured_fraction_theta_max   0.998 
_diffrn_measured_fraction_theta_full  0.998 
_diffrn_reflns_Laue_measured_fraction_max    0.998 
_diffrn_reflns_Laue_measured_fraction_full   0.998 
_diffrn_reflns_point_group_measured_fraction_max   0.998 
_diffrn_reflns_point_group_measured_fraction_full  0.998 
_reflns_number_total              9359 
_reflns_number_gt                 7640 
_reflns_threshold_expression      'I > 2\s(I)' 
_reflns_Friedel_coverage          0.000 
_reflns_Friedel_fraction_max      . 
_reflns_Friedel_fraction_full     . 
  
_reflns_special_details 
; 
 Reflections were merged by SHELXL according to the crystal 
 class for the calculation of statistics and refinement. 
  
 Structure factors included contributions from the .fab file. 
  
 _reflns_Friedel_fraction is defined as the number of unique 
 Friedel pairs measured divided by the number that would be 
 possible theoretically, ignoring centric projections and 
 systematic absences. 
; 
  
_computing_data_collection        'Bruker APEX2' 
_computing_cell_refinement        'Bruker SAINT' 
_computing_data_reduction         'Bruker SAINT' 
_computing_structure_solution     'SHELXS-97 (Sheldrick, 2008)' 
_computing_structure_refinement   'SHELXL-2014 (Sheldrick, 2014)' 
_computing_molecular_graphics     'Bruker SHELXTL' 
_computing_publication_material   'Bruker SHELXTL' 
  
_refine_special_details 
; 
 ? 
; 
_refine_ls_structure_factor_coef  Fsqd 
_refine_ls_matrix_type            full 
_refine_ls_weighting_scheme       calc 
_refine_ls_weighting_details 
'w=1/[\s^2^(Fo^2^)+(0.0303P)^2^] where P=(Fo^2^+2Fc^2^)/3' 
_atom_sites_solution_primary      ? 
_atom_sites_solution_secondary    ? 
_atom_sites_solution_hydrogens    geom 
_refine_ls_hydrogen_treatment     constr 
_refine_ls_extinction_method      none 
_refine_ls_extinction_coef        . 
_refine_ls_number_reflns          9359 
_refine_ls_number_parameters      541 
_refine_ls_number_restraints      36 
_refine_ls_R_factor_all           0.0412 
_refine_ls_R_factor_gt            0.0289 
_refine_ls_wR_factor_ref          0.0665 
_refine_ls_wR_factor_gt           0.0620 
_refine_ls_goodness_of_fit_ref    0.995 
_refine_ls_restrained_S_all       1.010 
_refine_ls_shift/su_max           0.001 
_refine_ls_shift/su_mean          0.000 
  
loop_ 
 _atom_site_label 
 _atom_site_type_symbol 
 _atom_site_fract_x 
 _atom_site_fract_y 
 _atom_site_fract_z 
 _atom_site_U_iso_or_equiv 
 _atom_site_adp_type 
 _atom_site_occupancy 
 _atom_site_site_symmetry_order 
 _atom_site_calc_flag 
 _atom_site_refinement_flags_posn 
 _atom_site_refinement_flags_adp 
 _atom_site_refinement_flags_occupancy 
 _atom_site_disorder_assembly 
 _atom_site_disorder_group 
C1 C 0.4800(3) 0.11628(15) 0.7735(2) 0.0180(9) Uani 1 1 d . . . . . 
C2 C 0.4744(3) 0.16924(15) 0.7360(2) 0.0166(9) Uani 1 1 d . . . . . 
C3 C 0.5423(3) 0.16229(15) 0.6736(2) 0.0178(8) Uani 1 1 d . . . . . 
H3 H 0.5575 0.1911 0.6397 0.021 Uiso 1 1 calc R U . . . 
C4 C 0.5846(3) 0.10729(16) 0.6682(2) 0.0207(9) Uani 1 1 d . . . . . 
C5 C 0.5483(3) 0.08038(15) 0.7310(2) 0.0205(9) Uani 1 1 d . . . . . 
H5 H 0.5669 0.0430 0.7435 0.025 Uiso 1 1 calc R U . . . 
C6 C 0.4287(3) 0.09749(16) 0.8450(2) 0.0226(9) Uani 1 1 d . . . . . 
C7 C 0.4680(3) 0.03763(16) 0.8641(2) 0.0299(11) Uani 1 1 d . . . . . 
H7A H 0.4400 0.0116 0.8269 0.045 Uiso 1 1 calc R U . . . 
H7B H 0.4373 0.0269 0.9113 0.045 Uiso 1 1 calc R U . . . 
H7C H 0.5514 0.0363 0.8663 0.045 Uiso 1 1 calc R U . . . 
C8 C 0.2975(3) 0.09464(18) 0.8416(3) 0.0372(12) Uani 1 1 d . . . . . 
H8A H 0.2668 0.1316 0.8294 0.056 Uiso 1 1 calc R U . . . 
H8B H 0.2687 0.0829 0.8888 0.056 Uiso 1 1 calc R U . . . 
H8C H 0.2736 0.0677 0.8045 0.056 Uiso 1 1 calc R U . . . 
C9 C 0.4714(3) 0.13501(17) 0.9071(2) 0.0270(10) Uani 1 1 d . . . . . 
H9A H 0.5547 0.1328 0.9107 0.040 Uiso 1 1 calc R U . . . 
H9B H 0.4382 0.1225 0.9527 0.040 Uiso 1 1 calc R U . . . 
H9C H 0.4485 0.1737 0.8975 0.040 Uiso 1 1 calc R U . . . 
C10 C 0.3889(3) 0.21838(15) 0.7382(2) 0.0186(9) Uani 1 1 d . . . . . 
C11 C 0.3491(3) 0.23864(16) 0.8125(2) 0.0235(9) Uani 1 1 d . . . . . 
H11A H 0.3125 0.2078 0.8381 0.035 Uiso 1 1 calc R U . . . 
H11B H 0.2944 0.2692 0.8059 0.035 Uiso 1 1 calc R U . . . 
H11C H 0.4149 0.2519 0.8409 0.035 Uiso 1 1 calc R U . . . 
C12 C 0.2841(3) 0.19946(19) 0.6926(2) 0.0307(11) Uani 1 1 d . . . . . 
H12A H 0.3087 0.1886 0.6440 0.046 Uiso 1 1 calc R U . . . 
H12B H 0.2294 0.2303 0.6887 0.046 Uiso 1 1 calc R U . . . 
H12C H 0.2479 0.1675 0.7161 0.046 Uiso 1 1 calc R U . . . 
C13 C 0.4392(3) 0.27009(15) 0.7004(2) 0.0234(9) Uani 1 1 d . . . . . 
H13A H 0.5096 0.2814 0.7255 0.035 Uiso 1 1 calc R U . . . 
H13B H 0.3840 0.3008 0.7016 0.035 Uiso 1 1 calc R U . . . 
H13C H 0.4561 0.2609 0.6499 0.035 Uiso 1 1 calc R U . . . 
C14 C 0.6267(4) 0.08012(17) 0.5976(2) 0.0295(11) Uani 1 1 d . . . . . 
C15 C 0.5705(5) 0.1102(2) 0.5334(3) 0.0576(17) Uani 1 1 d . . . . . 
H15A H 0.5905 0.0912 0.4883 0.086 Uiso 1 1 calc R U . . . 
H15B H 0.5973 0.1489 0.5318 0.086 Uiso 1 1 calc R U . . . 
H15C H 0.4875 0.1098 0.5389 0.086 Uiso 1 1 calc R U . . . 
C16 C 0.7556(4) 0.08215(19) 0.5870(2) 0.0368(12) Uani 1 1 d . . . . . 
H16A H 0.7937 0.0605 0.6253 0.055 Uiso 1 1 calc R U . . . 
H16B H 0.7816 0.1210 0.5892 0.055 Uiso 1 1 calc R U . . . 
H16C H 0.7740 0.0663 0.5396 0.055 Uiso 1 1 calc R U . . . 
C17 C 0.5891(4) 0.01848(18) 0.5955(3) 0.0454(14) Uani 1 1 d . . . . . 
H17A H 0.6233 -0.0015 0.6368 0.068 Uiso 1 1 calc R U . . . 
H17B H 0.6141 0.0013 0.5502 0.068 Uiso 1 1 calc R U . . . 
H17C H 0.5058 0.0164 0.5982 0.068 Uiso 1 1 calc R U . . . 
C18 C 0.8148(3) 0.12617(15) 0.9294(2) 0.0145(8) Uani 1 1 d . . . . . 
C19 C 0.8045(3) 0.07864(15) 0.88416(19) 0.0145(8) Uani 1 1 d . . . . . 
H19 H 0.7555 0.0479 0.8930 0.017 Uiso 1 1 calc R U . . . 
C20 C 0.8771(3) 0.08331(15) 0.8243(2) 0.0156(8) Uani 1 1 d . . . . . 
C21 C 0.9286(3) 0.13628(15) 0.8296(2) 0.0162(8) Uani 1 1 d . . . . . 
H21 H 0.9795 0.1516 0.7953 0.019 Uiso 1 1 calc R U . . . 
C22 C 0.8929(3) 0.16374(15) 0.8947(2) 0.0161(8) Uani 1 1 d . . . . . 
C23 C 0.7719(3) 0.12411(15) 1.0081(2) 0.0180(9) Uani 1 1 d . . . . . 
C24 C 0.6947(4) 0.17277(15) 1.0325(2) 0.0233(10) Uani 1 1 d . . . . . 
H24A H 0.7271 0.2083 1.0163 0.035 Uiso 1 1 calc R U . . . 
H24B H 0.6897 0.1728 1.0855 0.035 Uiso 1 1 calc R U . . . 
H24C H 0.6183 0.1681 1.0112 0.035 Uiso 1 1 calc R U . . . 
C25 C 0.8771(3) 0.11967(17) 1.0590(2) 0.0235(9) Uani 1 1 d . . . . . 
H25A H 0.9250 0.0884 1.0437 0.035 Uiso 1 1 calc R U . . . 
H25B H 0.8520 0.1133 1.1088 0.035 Uiso 1 1 calc R U . . . 
H25C H 0.9210 0.1544 1.0569 0.035 Uiso 1 1 calc R U . . . 
C26 C 0.7046(3) 0.06967(15) 1.0215(2) 0.0205(9) Uani 1 1 d . . . . . 
H26A H 0.6399 0.0676 0.9874 0.031 Uiso 1 1 calc R U . . . 
H26B H 0.6765 0.0695 1.0713 0.031 Uiso 1 1 calc R U . . . 
H26C H 0.7547 0.0375 1.0143 0.031 Uiso 1 1 calc R U . . . 
C27 C 0.9175(3) 0.03483(15) 0.7777(2) 0.0190(9) Uani 1 1 d . . . . . 
C28 C 0.9977(4) -0.00106(17) 0.8267(2) 0.0301(11) Uani 1 1 d . . . . . 
H28A H 1.0617 0.0219 0.8439 0.045 Uiso 1 1 calc R U . . . 
H28B H 1.0266 -0.0327 0.7988 0.045 Uiso 1 1 calc R U . . . 
H28C H 0.9552 -0.0149 0.8684 0.045 Uiso 1 1 calc R U . . . 
C29 C 0.8185(4) -0.00196(15) 0.7538(2) 0.0242(10) Uani 1 1 d . . . . . 
H29A H 0.7791 -0.0160 0.7966 0.036 Uiso 1 1 calc R U . . . 
H29B H 0.8473 -0.0335 0.7256 0.036 Uiso 1 1 calc R U . . . 
H29C H 0.7653 0.0199 0.7239 0.036 Uiso 1 1 calc R U . . . 
C30 C 0.9872(4) 0.05530(17) 0.7136(2) 0.0296(10) Uani 1 1 d . . . . . 
H30A H 0.9426 0.0827 0.6858 0.044 Uiso 1 1 calc R U . . . 
H30B H 1.0060 0.0236 0.6824 0.044 Uiso 1 1 calc R U . . . 
H30C H 1.0577 0.0728 0.7316 0.044 Uiso 1 1 calc R U . . . 
C31 C 0.9624(3) 0.21558(15) 0.9194(2) 0.0202(9) Uani 1 1 d . . . . . 
C32 C 0.9886(4) 0.25397(16) 0.8553(2) 0.0256(10) Uani 1 1 d . . . . . 
H32A H 1.0345 0.2857 0.8723 0.038 Uiso 1 1 calc R U . . . 
H32B H 0.9170 0.2677 0.8339 0.038 Uiso 1 1 calc R U . . . 
H32C H 1.0308 0.2331 0.8188 0.038 Uiso 1 1 calc R U . . . 
C33 C 0.9073(4) 0.25238(16) 0.9770(2) 0.0260(10) Uani 1 1 d . . . . . 
H33A H 0.8980 0.2308 1.0216 0.039 Uiso 1 1 calc R U . . . 
H33B H 0.8325 0.2651 0.9594 0.039 Uiso 1 1 calc R U . . . 
H33C H 0.9561 0.2848 0.9868 0.039 Uiso 1 1 calc R U . . . 
C34 C 1.0770(3) 0.19372(18) 0.9486(2) 0.0291(10) Uani 1 1 d . . . . . 
H34A H 1.0640 0.1698 0.9908 0.044 Uiso 1 1 calc R U . . . 
H34B H 1.1254 0.2253 0.9629 0.044 Uiso 1 1 calc R U . . . 
H34C H 1.1148 0.1721 0.9108 0.044 Uiso 1 1 calc R U . . . 
C35 C 0.7810(3) 0.23474(15) 0.5782(2) 0.0195(9) Uani 1 1 d . . . . . 
H35 H 0.7041 0.2471 0.5759 0.023 Uiso 1 1 calc R U . . . 
C36 C 0.8395(4) 0.22562(16) 0.5148(2) 0.0243(10) Uani 1 1 d . . . . . 
H36 H 0.8025 0.2319 0.4694 0.029 Uiso 1 1 calc R U . . . 
C37 C 0.9518(3) 0.20745(16) 0.5168(2) 0.0243(10) Uani 1 1 d . . . . . 
H37 H 0.9919 0.2013 0.4731 0.029 Uiso 1 1 calc R U . . . 
C38 C 1.0041(3) 0.19847(16) 0.5827(2) 0.0232(9) Uani 1 1 d . . . . . 
H38 H 1.0810 0.1861 0.5848 0.028 Uiso 1 1 calc R U . . . 
C39 C 0.9455(3) 0.20732(15) 0.6465(2) 0.0180(9) Uani 1 1 d . . . . . 
H39 H 0.9827 0.2004 0.6916 0.022 Uiso 1 1 calc R U . . . 
C40 C 0.8331(3) 0.22614(14) 0.6455(2) 0.0157(8) Uani 1 1 d . . . . . 
C41 C 0.7728(3) 0.23763(15) 0.7144(2) 0.0148(8) Uani 1 1 d . . . . . 
C42 C 0.7503(3) 0.29166(15) 0.73024(19) 0.0147(8) Uani 1 1 d . . . . . 
C43 C 0.7802(3) 0.33921(15) 0.6805(2) 0.0164(8) Uani 1 1 d . . . . . 
C44 C 0.7002(4) 0.36367(16) 0.6359(2) 0.0235(9) Uani 1 1 d . . . . . 
H44 H 0.6227 0.3525 0.6388 0.028 Uiso 1 1 calc R U . . . 
C45 C 0.7312(4) 0.40440(16) 0.5867(2) 0.0273(10) Uani 1 1 d . . . . . 
H45 H 0.6749 0.4203 0.5554 0.033 Uiso 1 1 calc R U . . . 
C46 C 0.8419(4) 0.42210(16) 0.5824(2) 0.0297(11) Uani 1 1 d . . . . . 
H46 H 0.8628 0.4504 0.5490 0.036 Uiso 1 1 calc R U . . . 
C47 C 0.9214(4) 0.39822(17) 0.6273(3) 0.0355(12) Uani 1 1 d . . . . . 
H47 H 0.9984 0.4102 0.6249 0.043 Uiso 1 1 calc R U . . . 
C48 C 0.8922(4) 0.35696(16) 0.6762(2) 0.0281(10) Uani 1 1 d . . . . . 
H48 H 0.9491 0.3408 0.7068 0.034 Uiso 1 1 calc R U . . . 
C49 C 0.7019(3) 0.30892(15) 0.8008(2) 0.0154(8) Uani 1 1 d . . . . . 
C50 C 0.6666(4) 0.38134(16) 0.8845(3) 0.0343(12) Uani 1 1 d . U . . . 
C51 C 0.7446(5) 0.38685(19) 0.9414(3) 0.0470(14) Uani 1 1 d . U . . . 
H51 H 0.8202 0.3734 0.9361 0.056 Uiso 1 1 calc R U . . . 
C52 C 0.7127(7) 0.4120(2) 1.0060(3) 0.0707(19) Uani 1 1 d . U . . . 
H52 H 0.7662 0.4155 1.0449 0.085 Uiso 1 1 calc R U . . . 
C53 C 0.6066(8) 0.4311(2) 1.0131(4) 0.076(2) Uani 1 1 d . U . . . 
H53 H 0.5860 0.4481 1.0576 0.091 Uiso 1 1 calc R U . . . 
C54 C 0.5278(6) 0.4274(2) 0.9598(4) 0.069(2) Uani 1 1 d . U . . . 
H54 H 0.4530 0.4416 0.9665 0.083 Uiso 1 1 calc R U . . . 
C55 C 0.5582(5) 0.40163(19) 0.8929(3) 0.0498(15) Uani 1 1 d . U . . . 
H55 H 0.5037 0.3986 0.8545 0.060 Uiso 1 1 calc R U . . . 
N1 N 0.7021(3) 0.36079(13) 0.81695(18) 0.0238(8) Uani 1 1 d . . . . . 
S1 S 0.65062(8) 0.25698(4) 0.86154(5) 0.0171(2) Uani 1 1 d . . . . . 
Th1 Th 0.70021(2) 0.15896(2) 0.79202(2) 0.01264(5) Uani 1 1 d . . . . . 
  
loop_ 
 _atom_site_aniso_label 
 _atom_site_aniso_U_11 
 _atom_site_aniso_U_22 
 _atom_site_aniso_U_33 
 _atom_site_aniso_U_23 
 _atom_site_aniso_U_13 
 _atom_site_aniso_U_12 
C1 0.015(2) 0.0130(19) 0.026(2) -0.0013(17) -0.0022(17) -0.0041(16) 
C2 0.0119(19) 0.018(2) 0.020(2) 0.0000(17) -0.0018(16) -0.0021(16) 
C3 0.017(2) 0.018(2) 0.018(2) -0.0004(17) -0.0054(16) -0.0027(17) 
C4 0.019(2) 0.019(2) 0.023(2) -0.0063(18) -0.0086(18) 0.0002(17) 
C5 0.020(2) 0.0127(19) 0.028(2) -0.0044(18) -0.0063(18) -0.0033(17) 
C6 0.016(2) 0.021(2) 0.031(2) 0.0104(19) 0.0015(18) -0.0038(17) 
C7 0.024(2) 0.024(2) 0.042(3) 0.012(2) -0.001(2) -0.0045(19) 
C8 0.022(2) 0.033(3) 0.057(3) 0.012(2) 0.007(2) -0.003(2) 
C9 0.024(2) 0.031(2) 0.026(2) 0.012(2) 0.0060(19) 0.0022(19) 
C10 0.018(2) 0.017(2) 0.021(2) 0.0023(17) -0.0009(17) 0.0033(16) 
C11 0.019(2) 0.023(2) 0.028(2) 0.0034(19) 0.0046(19) 0.0066(18) 
C12 0.025(2) 0.034(3) 0.032(3) 0.001(2) -0.004(2) 0.008(2) 
C13 0.028(2) 0.018(2) 0.024(2) 0.0050(18) -0.0010(19) 0.0076(18) 
C14 0.034(3) 0.030(2) 0.025(2) -0.011(2) -0.005(2) 0.009(2) 
C15 0.081(4) 0.064(4) 0.026(3) -0.024(3) -0.026(3) 0.042(3) 
C16 0.048(3) 0.036(3) 0.027(3) 0.000(2) 0.005(2) 0.010(2) 
C17 0.050(3) 0.034(3) 0.052(3) -0.026(3) -0.006(3) 0.008(2) 
C18 0.014(2) 0.017(2) 0.012(2) -0.0013(16) -0.0027(16) 0.0023(16) 
C19 0.017(2) 0.0127(19) 0.014(2) 0.0019(16) -0.0001(16) -0.0020(16) 
C20 0.017(2) 0.0144(19) 0.015(2) 0.0000(16) -0.0053(16) 0.0031(16) 
C21 0.014(2) 0.0177(19) 0.016(2) 0.0025(17) 0.0020(16) 0.0023(16) 
C22 0.017(2) 0.0149(19) 0.016(2) -0.0011(17) -0.0055(16) -0.0002(16) 
C23 0.022(2) 0.015(2) 0.017(2) 0.0019(17) 0.0018(17) -0.0006(17) 
C24 0.034(3) 0.019(2) 0.017(2) -0.0048(17) 0.0050(19) 0.0000(18) 
C25 0.032(3) 0.025(2) 0.013(2) 0.0019(18) -0.0012(18) 0.0027(19) 
C26 0.026(2) 0.019(2) 0.017(2) 0.0018(17) 0.0051(18) -0.0010(18) 
C27 0.025(2) 0.014(2) 0.018(2) -0.0009(17) 0.0034(17) 0.0061(17) 
C28 0.031(3) 0.026(2) 0.034(3) 0.001(2) -0.001(2) 0.012(2) 
C29 0.040(3) 0.0113(19) 0.021(2) -0.0056(17) 0.001(2) 0.0021(18) 
C30 0.037(3) 0.027(2) 0.025(2) -0.007(2) 0.008(2) 0.006(2) 
C31 0.023(2) 0.019(2) 0.019(2) 0.0012(17) -0.0055(17) -0.0088(17) 
C32 0.027(2) 0.022(2) 0.027(2) 0.0021(19) -0.0109(19) -0.0088(19) 
C33 0.033(3) 0.020(2) 0.025(2) -0.0081(18) -0.006(2) -0.0091(19) 
C34 0.028(2) 0.032(2) 0.027(3) 0.001(2) -0.008(2) -0.005(2) 
C35 0.022(2) 0.021(2) 0.016(2) 0.0000(17) 0.0002(17) 0.0089(17) 
C36 0.037(3) 0.026(2) 0.010(2) 0.0010(18) 0.0008(19) 0.0063(19) 
C37 0.031(3) 0.023(2) 0.019(2) 0.0017(18) 0.0115(19) 0.0048(19) 
C38 0.023(2) 0.021(2) 0.026(2) -0.0007(19) 0.0062(19) 0.0047(18) 
C39 0.019(2) 0.020(2) 0.015(2) -0.0018(17) -0.0012(17) -0.0029(17) 
C40 0.022(2) 0.0107(19) 0.014(2) 0.0011(16) 0.0040(17) -0.0020(16) 
C41 0.015(2) 0.018(2) 0.012(2) -0.0030(16) -0.0005(16) 0.0017(16) 
C42 0.013(2) 0.019(2) 0.012(2) -0.0001(16) -0.0002(16) -0.0014(16) 
C43 0.024(2) 0.0136(19) 0.0114(18) -0.0025(17) 0.0050(16) -0.0018(17) 
C44 0.027(2) 0.021(2) 0.022(2) 0.0030(18) -0.0028(19) -0.0040(18) 
C45 0.047(3) 0.016(2) 0.019(2) 0.0018(18) -0.003(2) 0.001(2) 
C46 0.053(3) 0.013(2) 0.023(2) 0.0004(19) 0.019(2) 0.000(2) 
C47 0.030(3) 0.022(2) 0.055(3) 0.002(2) 0.020(2) -0.004(2) 
C48 0.021(2) 0.026(2) 0.037(3) 0.008(2) 0.004(2) 0.0010(18) 
C49 0.015(2) 0.016(2) 0.016(2) 0.0003(17) 0.0025(16) 0.0026(16) 
C50 0.062(3) 0.010(2) 0.032(3) 0.0036(19) 0.026(2) 0.003(2) 
C51 0.089(4) 0.025(2) 0.027(3) -0.006(2) 0.015(3) -0.006(3) 
C52 0.136(6) 0.040(3) 0.037(3) -0.003(3) 0.024(4) -0.021(4) 
C53 0.146(6) 0.028(3) 0.055(4) 0.002(3) 0.056(4) -0.005(4) 
C54 0.098(5) 0.029(3) 0.082(5) 0.013(3) 0.063(4) 0.018(3) 
C55 0.074(4) 0.031(3) 0.046(3) 0.010(2) 0.036(3) 0.008(3) 
N1 0.040(2) 0.0130(16) 0.0187(19) 0.0005(14) 0.0133(17) 0.0025(15) 
S1 0.0240(5) 0.0118(5) 0.0158(5) 0.0016(4) 0.0063(4) -0.0010(4) 
Th1 0.01385(8) 0.01078(7) 0.01325(8) -0.00007(6) -0.00072(5) -0.00019(6) 
  
_geom_special_details 
; 
 All esds (except the esd in the dihedral angle between two l.s. planes) 
 are estimated using the full covariance matrix.  The cell esds are taken 
 into account individually in the estimation of esds in distances, angles 
 and torsion angles; correlations between esds in cell parameters are only 
 used when they are defined by crystal symmetry.  An approximate (isotropic) 
 treatment of cell esds is used for estimating esds involving l.s. planes. 
; 
  
loop_ 
 _geom_bond_atom_site_label_1 
 _geom_bond_atom_site_label_2 
 _geom_bond_distance 
 _geom_bond_site_symmetry_2 
 _geom_bond_publ_flag 
C1 C5 1.420(5) . ? 
C1 C2 1.446(5) . ? 
C1 C6 1.525(5) . ? 
C1 Th1 2.795(4) . ? 
C2 C3 1.419(5) . ? 
C2 C10 1.548(5) . ? 
C2 Th1 2.841(4) . ? 
C3 C4 1.411(5) . ? 
C3 Th1 2.846(4) . ? 
C3 H3 0.9500 . ? 
C4 C5 1.396(5) . ? 
C4 C14 1.545(6) . ? 
C4 Th1 2.916(4) . ? 
C5 Th1 2.816(4) . ? 
C5 H5 0.9500 . ? 
C6 C9 1.535(6) . ? 
C6 C8 1.542(5) . ? 
C6 C7 1.545(5) . ? 
C7 H7A 0.9800 . ? 
C7 H7B 0.9800 . ? 
C7 H7C 0.9800 . ? 
C8 H8A 0.9800 . ? 
C8 H8B 0.9800 . ? 
C8 H8C 0.9800 . ? 
C9 H9A 0.9800 . ? 
C9 H9B 0.9800 . ? 
C9 H9C 0.9800 . ? 
C10 C11 1.532(5) . ? 
C10 C13 1.543(5) . ? 
C10 C12 1.548(5) . ? 
C11 H11A 0.9800 . ? 
C11 H11B 0.9800 . ? 
C11 H11C 0.9800 . ? 
C12 H12A 0.9800 . ? 
C12 H12B 0.9800 . ? 
C12 H12C 0.9800 . ? 
C13 H13A 0.9800 . ? 
C13 H13B 0.9800 . ? 
C13 H13C 0.9800 . ? 
C14 C15 1.528(6) . ? 
C14 C16 1.528(6) . ? 
C14 C17 1.541(6) . ? 
C15 H15A 0.9800 . ? 
C15 H15B 0.9800 . ? 
C15 H15C 0.9800 . ? 
C16 H16A 0.9800 . ? 
C16 H16B 0.9800 . ? 
C16 H16C 0.9800 . ? 
C17 H17A 0.9800 . ? 
C17 H17B 0.9800 . ? 
C17 H17C 0.9800 . ? 
C18 C19 1.416(5) . ? 
C18 C22 1.441(5) . ? 
C18 C23 1.544(5) . ? 
C18 Th1 2.959(4) . ? 
C19 C20 1.409(5) . ? 
C19 Th1 2.834(4) . ? 
C19 H19 0.9500 . ? 
C20 C21 1.408(5) . ? 
C20 C27 1.523(5) . ? 
C20 Th1 2.812(4) . ? 
C21 C22 1.436(5) . ? 
C21 Th1 2.812(4) . ? 
C21 H21 0.9500 . ? 
C22 C31 1.550(5) . ? 
C22 Th1 2.932(4) . ? 
C23 C25 1.545(5) . ? 
C23 C26 1.546(5) . ? 
C23 C24 1.547(5) . ? 
C24 H24A 0.9800 . ? 
C24 H24B 0.9800 . ? 
C24 H24C 0.9800 . ? 
C25 H25A 0.9800 . ? 
C25 H25B 0.9800 . ? 
C25 H25C 0.9800 . ? 
C26 H26A 0.9800 . ? 
C26 H26B 0.9800 . ? 
C26 H26C 0.9800 . ? 
C27 C29 1.518(5) . ? 
C27 C30 1.528(5) . ? 
C27 C28 1.555(5) . ? 
C28 H28A 0.9800 . ? 
C28 H28B 0.9800 . ? 
C28 H28C 0.9800 . ? 
C29 H29A 0.9800 . ? 
C29 H29B 0.9800 . ? 
C29 H29C 0.9800 . ? 
C30 H30A 0.9800 . ? 
C30 H30B 0.9800 . ? 
C30 H30C 0.9800 . ? 
C31 C33 1.531(5) . ? 
C31 C32 1.532(5) . ? 
C31 C34 1.534(5) . ? 
C32 H32A 0.9800 . ? 
C32 H32B 0.9800 . ? 
C32 H32C 0.9800 . ? 
C33 H33A 0.9800 . ? 
C33 H33B 0.9800 . ? 
C33 H33C 0.9800 . ? 
C34 H34A 0.9800 . ? 
C34 H34B 0.9800 . ? 
C34 H34C 0.9800 . ? 
C35 C36 1.383(5) . ? 
C35 C40 1.391(5) . ? 
C35 H35 0.9500 . ? 
C36 C37 1.387(5) . ? 
C36 H36 0.9500 . ? 
C37 C38 1.372(5) . ? 
C37 H37 0.9500 . ? 
C38 C39 1.386(5) . ? 
C38 H38 0.9500 . ? 
C39 C40 1.394(5) . ? 
C39 H39 0.9500 . ? 
C40 C41 1.489(5) . ? 
C41 C42 1.354(5) . ? 
C41 Th1 2.522(4) . ? 
C42 C49 1.486(5) . ? 
C42 C43 1.507(5) . ? 
C43 C44 1.371(5) . ? 
C43 C48 1.385(5) . ? 
C44 C45 1.385(5) . ? 
C44 H44 0.9500 . ? 
C45 C46 1.370(6) . ? 
C45 H45 0.9500 . ? 
C46 C47 1.364(6) . ? 
C46 H46 0.9500 . ? 
C47 C48 1.385(6) . ? 
C47 H47 0.9500 . ? 
C48 H48 0.9500 . ? 
C49 N1 1.277(5) . ? 
C49 S1 1.784(4) . ? 
C50 C55 1.373(7) . ? 
C50 C51 1.389(7) . ? 
C50 N1 1.409(5) . ? 
C51 C52 1.392(7) . ? 
C51 H51 0.9500 . ? 
C52 C53 1.336(9) . ? 
C52 H52 0.9500 . ? 
C53 C54 1.343(9) . ? 
C53 H53 0.9500 . ? 
C54 C55 1.430(7) . ? 
C54 H54 0.9500 . ? 
C55 H55 0.9500 . ? 
S1 Th1 2.7413(9) . ? 
  
loop_ 
 _geom_angle_atom_site_label_1 
 _geom_angle_atom_site_label_2 
 _geom_angle_atom_site_label_3 
 _geom_angle 
 _geom_angle_site_symmetry_1 
 _geom_angle_site_symmetry_3 
 _geom_angle_publ_flag 
C5 C1 C2 106.8(3) . . ? 
C5 C1 C6 122.1(3) . . ? 
C2 C1 C6 131.1(3) . . ? 
C5 C1 Th1 76.2(2) . . ? 
C2 C1 Th1 76.9(2) . . ? 
C6 C1 Th1 112.2(2) . . ? 
C3 C2 C1 105.3(3) . . ? 
C3 C2 C10 118.9(3) . . ? 
C1 C2 C10 132.8(3) . . ? 
C3 C2 Th1 75.7(2) . . ? 
C1 C2 Th1 73.4(2) . . ? 
C10 C2 Th1 131.1(2) . . ? 
C4 C3 C2 111.6(3) . . ? 
C4 C3 Th1 78.6(2) . . ? 
C2 C3 Th1 75.4(2) . . ? 
C4 C3 H3 124.2 . . ? 
C2 C3 H3 124.2 . . ? 
Th1 C3 H3 113.6 . . ? 
C5 C4 C3 105.1(3) . . ? 
C5 C4 C14 127.6(4) . . ? 
C3 C4 C14 124.7(4) . . ? 
C5 C4 Th1 72.0(2) . . ? 
C3 C4 Th1 73.1(2) . . ? 
C14 C4 Th1 133.6(3) . . ? 
C4 C5 C1 111.1(3) . . ? 
C4 C5 Th1 79.9(2) . . ? 
C1 C5 Th1 74.5(2) . . ? 
C4 C5 H5 124.5 . . ? 
C1 C5 H5 124.5 . . ? 
Th1 C5 H5 113.0 . . ? 
C1 C6 C9 110.1(3) . . ? 
C1 C6 C8 112.6(3) . . ? 
C9 C6 C8 111.8(4) . . ? 
C1 C6 C7 110.6(3) . . ? 
C9 C6 C7 106.2(3) . . ? 
C8 C6 C7 105.2(3) . . ? 
C6 C7 H7A 109.5 . . ? 
C6 C7 H7B 109.5 . . ? 
H7A C7 H7B 109.5 . . ? 
C6 C7 H7C 109.5 . . ? 
H7A C7 H7C 109.5 . . ? 
H7B C7 H7C 109.5 . . ? 
C6 C8 H8A 109.5 . . ? 
C6 C8 H8B 109.5 . . ? 
H8A C8 H8B 109.5 . . ? 
C6 C8 H8C 109.5 . . ? 
H8A C8 H8C 109.5 . . ? 
H8B C8 H8C 109.5 . . ? 
C6 C9 H9A 109.5 . . ? 
C6 C9 H9B 109.5 . . ? 
H9A C9 H9B 109.5 . . ? 
C6 C9 H9C 109.5 . . ? 
H9A C9 H9C 109.5 . . ? 
H9B C9 H9C 109.5 . . ? 
C11 C10 C13 105.9(3) . . ? 
C11 C10 C2 118.1(3) . . ? 
C13 C10 C2 110.2(3) . . ? 
C11 C10 C12 109.2(3) . . ? 
C13 C10 C12 107.1(3) . . ? 
C2 C10 C12 105.9(3) . . ? 
C10 C11 H11A 109.5 . . ? 
C10 C11 H11B 109.5 . . ? 
H11A C11 H11B 109.5 . . ? 
C10 C11 H11C 109.5 . . ? 
H11A C11 H11C 109.5 . . ? 
H11B C11 H11C 109.5 . . ? 
C10 C12 H12A 109.5 . . ? 
C10 C12 H12B 109.5 . . ? 
H12A C12 H12B 109.5 . . ? 
C10 C12 H12C 109.5 . . ? 
H12A C12 H12C 109.5 . . ? 
H12B C12 H12C 109.5 . . ? 
C10 C13 H13A 109.5 . . ? 
C10 C13 H13B 109.5 . . ? 
H13A C13 H13B 109.5 . . ? 
C10 C13 H13C 109.5 . . ? 
H13A C13 H13C 109.5 . . ? 
H13B C13 H13C 109.5 . . ? 
C15 C14 C16 107.6(4) . . ? 
C15 C14 C17 108.2(4) . . ? 
C16 C14 C17 108.1(3) . . ? 
C15 C14 C4 108.5(3) . . ? 
C16 C14 C4 115.0(4) . . ? 
C17 C14 C4 109.2(4) . . ? 
C14 C15 H15A 109.5 . . ? 
C14 C15 H15B 109.5 . . ? 
H15A C15 H15B 109.5 . . ? 
C14 C15 H15C 109.5 . . ? 
H15A C15 H15C 109.5 . . ? 
H15B C15 H15C 109.5 . . ? 
C14 C16 H16A 109.5 . . ? 
C14 C16 H16B 109.5 . . ? 
H16A C16 H16B 109.5 . . ? 
C14 C16 H16C 109.5 . . ? 
H16A C16 H16C 109.5 . . ? 
H16B C16 H16C 109.5 . . ? 
C14 C17 H17A 109.5 . . ? 
C14 C17 H17B 109.5 . . ? 
H17A C17 H17B 109.5 . . ? 
C14 C17 H17C 109.5 . . ? 
H17A C17 H17C 109.5 . . ? 
H17B C17 H17C 109.5 . . ? 
C19 C18 C22 106.8(3) . . ? 
C19 C18 C23 120.2(3) . . ? 
C22 C18 C23 131.0(3) . . ? 
C19 C18 Th1 71.0(2) . . ? 
C22 C18 Th1 74.8(2) . . ? 
C23 C18 Th1 131.6(2) . . ? 
C20 C19 C18 110.6(3) . . ? 
C20 C19 Th1 74.7(2) . . ? 
C18 C19 Th1 80.8(2) . . ? 
C20 C19 H19 124.7 . . ? 
C18 C19 H19 124.7 . . ? 
Th1 C19 H19 111.8 . . ? 
C21 C20 C19 106.3(3) . . ? 
C21 C20 C27 126.1(3) . . ? 
C19 C20 C27 125.3(3) . . ? 
C21 C20 Th1 75.5(2) . . ? 
C19 C20 Th1 76.4(2) . . ? 
C27 C20 Th1 127.3(2) . . ? 
C20 C21 C22 110.0(3) . . ? 
C20 C21 Th1 75.5(2) . . ? 
C22 C21 Th1 80.2(2) . . ? 
C20 C21 H21 125.0 . . ? 
C22 C21 H21 125.0 . . ? 
Th1 C21 H21 111.5 . . ? 
C21 C22 C18 106.3(3) . . ? 
C21 C22 C31 117.0(3) . . ? 
C18 C22 C31 134.8(3) . . ? 
C21 C22 Th1 70.9(2) . . ? 
C18 C22 Th1 76.9(2) . . ? 
C31 C22 Th1 128.2(2) . . ? 
C18 C23 C25 107.8(3) . . ? 
C18 C23 C26 110.6(3) . . ? 
C25 C23 C26 104.5(3) . . ? 
C18 C23 C24 116.7(3) . . ? 
C25 C23 C24 109.9(3) . . ? 
C26 C23 C24 106.6(3) . . ? 
C23 C24 H24A 109.5 . . ? 
C23 C24 H24B 109.5 . . ? 
H24A C24 H24B 109.5 . . ? 
C23 C24 H24C 109.5 . . ? 
H24A C24 H24C 109.5 . . ? 
H24B C24 H24C 109.5 . . ? 
C23 C25 H25A 109.5 . . ? 
C23 C25 H25B 109.5 . . ? 
H25A C25 H25B 109.5 . . ? 
C23 C25 H25C 109.5 . . ? 
H25A C25 H25C 109.5 . . ? 
H25B C25 H25C 109.5 . . ? 
C23 C26 H26A 109.5 . . ? 
C23 C26 H26B 109.5 . . ? 
H26A C26 H26B 109.5 . . ? 
C23 C26 H26C 109.5 . . ? 
H26A C26 H26C 109.5 . . ? 
H26B C26 H26C 109.5 . . ? 
C29 C27 C20 111.3(3) . . ? 
C29 C27 C30 112.1(3) . . ? 
C20 C27 C30 111.5(3) . . ? 
C29 C27 C28 107.6(3) . . ? 
C20 C27 C28 106.5(3) . . ? 
C30 C27 C28 107.6(3) . . ? 
C27 C28 H28A 109.5 . . ? 
C27 C28 H28B 109.5 . . ? 
H28A C28 H28B 109.5 . . ? 
C27 C28 H28C 109.5 . . ? 
H28A C28 H28C 109.5 . . ? 
H28B C28 H28C 109.5 . . ? 
C27 C29 H29A 109.5 . . ? 
C27 C29 H29B 109.5 . . ? 
H29A C29 H29B 109.5 . . ? 
C27 C29 H29C 109.5 . . ? 
H29A C29 H29C 109.5 . . ? 
H29B C29 H29C 109.5 . . ? 
C27 C30 H30A 109.5 . . ? 
C27 C30 H30B 109.5 . . ? 
H30A C30 H30B 109.5 . . ? 
C27 C30 H30C 109.5 . . ? 
H30A C30 H30C 109.5 . . ? 
H30B C30 H30C 109.5 . . ? 
C33 C31 C32 106.4(3) . . ? 
C33 C31 C34 109.2(3) . . ? 
C32 C31 C34 107.0(3) . . ? 
C33 C31 C22 116.1(3) . . ? 
C32 C31 C22 111.3(3) . . ? 
C34 C31 C22 106.5(3) . . ? 
C31 C32 H32A 109.5 . . ? 
C31 C32 H32B 109.5 . . ? 
H32A C32 H32B 109.5 . . ? 
C31 C32 H32C 109.5 . . ? 
H32A C32 H32C 109.5 . . ? 
H32B C32 H32C 109.5 . . ? 
C31 C33 H33A 109.5 . . ? 
C31 C33 H33B 109.5 . . ? 
H33A C33 H33B 109.5 . . ? 
C31 C33 H33C 109.5 . . ? 
H33A C33 H33C 109.5 . . ? 
H33B C33 H33C 109.5 . . ? 
C31 C34 H34A 109.5 . . ? 
C31 C34 H34B 109.5 . . ? 
H34A C34 H34B 109.5 . . ? 
C31 C34 H34C 109.5 . . ? 
H34A C34 H34C 109.5 . . ? 
H34B C34 H34C 109.5 . . ? 
C36 C35 C40 121.0(4) . . ? 
C36 C35 H35 119.5 . . ? 
C40 C35 H35 119.5 . . ? 
C35 C36 C37 120.6(4) . . ? 
C35 C36 H36 119.7 . . ? 
C37 C36 H36 119.7 . . ? 
C38 C37 C36 119.0(4) . . ? 
C38 C37 H37 120.5 . . ? 
C36 C37 H37 120.5 . . ? 
C37 C38 C39 120.5(4) . . ? 
C37 C38 H38 119.7 . . ? 
C39 C38 H38 119.7 . . ? 
C38 C39 C40 121.2(4) . . ? 
C38 C39 H39 119.4 . . ? 
C40 C39 H39 119.4 . . ? 
C35 C40 C39 117.6(3) . . ? 
C35 C40 C41 121.7(3) . . ? 
C39 C40 C41 120.6(3) . . ? 
C42 C41 C40 117.2(3) . . ? 
C42 C41 Th1 121.5(3) . . ? 
C40 C41 Th1 121.0(2) . . ? 
C41 C42 C49 122.2(3) . . ? 
C41 C42 C43 122.9(3) . . ? 
C49 C42 C43 114.7(3) . . ? 
C44 C43 C48 118.5(4) . . ? 
C44 C43 C42 121.7(3) . . ? 
C48 C43 C42 119.7(4) . . ? 
C43 C44 C45 120.7(4) . . ? 
C43 C44 H44 119.6 . . ? 
C45 C44 H44 119.6 . . ? 
C46 C45 C44 120.9(4) . . ? 
C46 C45 H45 119.6 . . ? 
C44 C45 H45 119.6 . . ? 
C47 C46 C45 118.5(4) . . ? 
C47 C46 H46 120.8 . . ? 
C45 C46 H46 120.8 . . ? 
C46 C47 C48 121.5(4) . . ? 
C46 C47 H47 119.3 . . ? 
C48 C47 H47 119.3 . . ? 
C47 C48 C43 120.0(4) . . ? 
C47 C48 H48 120.0 . . ? 
C43 C48 H48 120.0 . . ? 
N1 C49 C42 118.4(3) . . ? 
N1 C49 S1 122.1(3) . . ? 
C42 C49 S1 119.5(3) . . ? 
C55 C50 C51 118.9(5) . . ? 
C55 C50 N1 120.6(5) . . ? 
C51 C50 N1 120.1(4) . . ? 
C50 C51 C52 120.4(6) . . ? 
C50 C51 H51 119.8 . . ? 
C52 C51 H51 119.8 . . ? 
C53 C52 C51 119.6(7) . . ? 
C53 C52 H52 120.2 . . ? 
C51 C52 H52 120.2 . . ? 
C52 C53 C54 122.6(6) . . ? 
C52 C53 H53 118.7 . . ? 
C54 C53 H53 118.7 . . ? 
C53 C54 C55 118.9(6) . . ? 
C53 C54 H54 120.5 . . ? 
C55 C54 H54 120.5 . . ? 
C50 C55 C54 119.5(6) . . ? 
C50 C55 H55 120.2 . . ? 
C54 C55 H55 120.2 . . ? 
C49 N1 C50 123.1(3) . . ? 
C49 S1 Th1 103.14(12) . . ? 
C41 Th1 S1 72.64(8) . . ? 
C41 Th1 C1 121.52(11) . . ? 
S1 Th1 C1 99.70(8) . . ? 
C41 Th1 C21 87.48(11) . . ? 
S1 Th1 C21 104.93(8) . . ? 
C1 Th1 C21 146.69(11) . . ? 
C41 Th1 C20 110.32(11) . . ? 
S1 Th1 C20 127.84(8) . . ? 
C1 Th1 C20 117.93(10) . . ? 
C21 Th1 C20 29.00(10) . . ? 
C41 Th1 C5 119.27(12) . . ? 
S1 Th1 C5 128.47(8) . . ? 
C1 Th1 C5 29.31(11) . . ? 
C21 Th1 C5 124.42(11) . . ? 
C20 Th1 C5 96.61(11) . . ? 
C41 Th1 C19 134.53(11) . . ? 
S1 Th1 C19 113.15(8) . . ? 
C1 Th1 C19 102.47(11) . . ? 
C21 Th1 C19 47.05(11) . . ? 
C20 Th1 C19 28.90(10) . . ? 
C5 Th1 C19 92.99(11) . . ? 
C41 Th1 C2 92.83(11) . . ? 
S1 Th1 C2 83.87(8) . . ? 
C1 Th1 C2 29.71(10) . . ? 
C21 Th1 C2 170.84(11) . . ? 
C20 Th1 C2 144.53(10) . . ? 
C5 Th1 C2 47.98(10) . . ? 
C19 Th1 C2 132.05(10) . . ? 
C41 Th1 C3 76.39(11) . . ? 
S1 Th1 C3 101.25(8) . . ? 
C1 Th1 C3 47.59(11) . . ? 
C21 Th1 C3 143.41(11) . . ? 
C20 Th1 C3 130.62(11) . . ? 
C5 Th1 C3 46.37(11) . . ? 
C19 Th1 C3 138.65(10) . . ? 
C2 Th1 C3 28.89(11) . . ? 
C41 Th1 C4 91.68(11) . . ? 
S1 Th1 C4 129.09(8) . . ? 
C1 Th1 C4 47.92(11) . . ? 
C21 Th1 C4 122.87(11) . . ? 
C20 Th1 C4 103.08(11) . . ? 
C5 Th1 C4 28.13(11) . . ? 
C19 Th1 C4 111.98(11) . . ? 
C2 Th1 C4 47.97(11) . . ? 
C3 Th1 C4 28.33(10) . . ? 
C41 Th1 C22 94.26(11) . . ? 
S1 Th1 C22 80.27(7) . . ? 
C1 Th1 C22 142.80(11) . . ? 
C21 Th1 C22 28.87(10) . . ? 
C20 Th1 C22 47.80(10) . . ? 
C5 Th1 C22 139.70(11) . . ? 
C19 Th1 C22 46.85(10) . . ? 
C2 Th1 C22 159.81(11) . . ? 
C3 Th1 C22 169.41(11) . . ? 
C4 Th1 C22 150.34(10) . . ? 
C41 Th1 C18 122.12(11) . . ? 
S1 Th1 C18 85.59(7) . . ? 
C1 Th1 C18 114.57(11) . . ? 
C21 Th1 C18 46.94(10) . . ? 
C20 Th1 C18 47.37(10) . . ? 
C5 Th1 C18 116.29(11) . . ? 
C19 Th1 C18 28.19(10) . . ? 
C2 Th1 C18 138.15(10) . . ? 
C3 Th1 C18 161.49(10) . . ? 
C4 Th1 C18 139.41(11) . . ? 
C22 Th1 C18 28.32(10) . . ? 
  
_refine_diff_density_max    0.799 
_refine_diff_density_min   -0.602 
_refine_diff_density_rms    0.098 
  
_shelxl_version_number 2014-3 
  
_shelx_res_file 
; 
TITL 131104a_0m in P2(1)/n 
CELL 0.71073  11.7337  23.9476  18.4523  90.000  90.796  90.000 
ZERR    4.00   0.0006   0.0012   0.0010   0.000   0.001   0.000 
LATT 1 
SYMM 0.5-X, 0.5+Y, 0.5-Z 
SFAC C  H  N  S  Th 
UNIT 220  292  4  4  4 
OMIT -3 50.5 
L.S. 8 
ACTA 
BOND $H 
FMAP 2 
ISOR 0.01 C50 C51 C52 C53 C54 C55 
PLAN 50 
SIZE 0.15 0.12 0.09 
TEMP -173.000 
ABIN 
WGHT    0.030300 
FVAR       0.06229 
MOLE 1 
C1    1    0.479993    0.116278    0.773500    11.00000    0.01501    0.01299 = 
         0.02583   -0.00134   -0.00223   -0.00405 
C2    1    0.474410    0.169240    0.736002    11.00000    0.01191    0.01768 = 
         0.02016   -0.00002   -0.00184   -0.00209 
C3    1    0.542317    0.162291    0.673637    11.00000    0.01732    0.01802 = 
         0.01788   -0.00040   -0.00540   -0.00265 
AFIX  43 
H3    2    0.557454    0.191091    0.639698    11.00000   -1.20000 
AFIX   0 
C4    1    0.584612    0.107294    0.668246    11.00000    0.01920    0.01906 = 
         0.02344   -0.00635   -0.00864    0.00024 
C5    1    0.548326    0.080380    0.730960    11.00000    0.02031    0.01271 = 
         0.02824   -0.00436   -0.00633   -0.00327 
AFIX  43 
H5    2    0.566917    0.042968    0.743513    11.00000   -1.20000 
AFIX   0 
C6    1    0.428697    0.097487    0.844975    11.00000    0.01604    0.02132 = 
         0.03055    0.01035    0.00154   -0.00379 
C7    1    0.467966    0.037632    0.864111    11.00000    0.02393    0.02373 = 
         0.04204    0.01179   -0.00144   -0.00453 
AFIX 137 
H7A   2    0.440047    0.011640    0.826883    11.00000   -1.50000 
H7B   2    0.437338    0.026945    0.911265    11.00000   -1.50000 
H7C   2    0.551420    0.036346    0.866324    11.00000   -1.50000 
AFIX   0 
C8    1    0.297484    0.094643    0.841620    11.00000    0.02221    0.03264 = 
         0.05698    0.01223    0.00699   -0.00332 
AFIX 137 
H8A   2    0.266764    0.131567    0.829402    11.00000   -1.50000 
H8B   2    0.268700    0.082895    0.888834    11.00000   -1.50000 
H8C   2    0.273570    0.067658    0.804490    11.00000   -1.50000 
AFIX   0 
C9    1    0.471380    0.135011    0.907076    11.00000    0.02392    0.03143 = 
         0.02579    0.01222    0.00604    0.00216 
AFIX 137 
H9A   2    0.554666    0.132797    0.910651    11.00000   -1.50000 
H9B   2    0.438195    0.122493    0.952734    11.00000   -1.50000 
H9C   2    0.448534    0.173704    0.897497    11.00000   -1.50000 
AFIX   0 
C10   1    0.388888    0.218383    0.738231    11.00000    0.01758    0.01739 = 
         0.02085    0.00231   -0.00092    0.00325 
C11   1    0.349082    0.238644    0.812459    11.00000    0.01937    0.02317 = 
         0.02796    0.00344    0.00462    0.00663 
AFIX 137 
H11A  2    0.312537    0.207757    0.838094    11.00000   -1.50000 
H11B  2    0.294387    0.269216    0.805894    11.00000   -1.50000 
H11C  2    0.414863    0.251920    0.840869    11.00000   -1.50000 
AFIX   0 
C12   1    0.284138    0.199459    0.692595    11.00000    0.02523    0.03433 = 
         0.03234    0.00066   -0.00381    0.00757 
AFIX 137 
H12A  2    0.308710    0.188638    0.644034    11.00000   -1.50000 
H12B  2    0.229440    0.230278    0.688732    11.00000   -1.50000 
H12C  2    0.247950    0.167483    0.716129    11.00000   -1.50000 
AFIX   0 
C13   1    0.439244    0.270089    0.700370    11.00000    0.02756    0.01841 = 
         0.02416    0.00498   -0.00097    0.00761 
AFIX 137 
H13A  2    0.509599    0.281441    0.725537    11.00000   -1.50000 
H13B  2    0.384042    0.300771    0.701645    11.00000   -1.50000 
H13C  2    0.456068    0.260888    0.649886    11.00000   -1.50000 
AFIX   0 
C14   1    0.626674    0.080124    0.597569    11.00000    0.03378    0.02985 = 
         0.02464   -0.01096   -0.00481    0.00944 
C15   1    0.570480    0.110197    0.533360    11.00000    0.08125    0.06450 = 
         0.02641   -0.02386   -0.02565    0.04225 
AFIX 137 
H15A  2    0.590524    0.091187    0.488265    11.00000   -1.50000 
H15B  2    0.597349    0.148919    0.531789    11.00000   -1.50000 
H15C  2    0.487532    0.109769    0.538851    11.00000   -1.50000 
AFIX   0 
C16   1    0.755551    0.082150    0.586983    11.00000    0.04827    0.03575 = 
         0.02652   -0.00027    0.00498    0.01020 
AFIX 137 
H16A  2    0.793660    0.060491    0.625312    11.00000   -1.50000 
H16B  2    0.781596    0.121002    0.589210    11.00000   -1.50000 
H16C  2    0.774042    0.066257    0.539639    11.00000   -1.50000 
AFIX   0 
C17   1    0.589075    0.018482    0.595508    11.00000    0.05007    0.03436 = 
         0.05150   -0.02642   -0.00616    0.00794 
AFIX 137 
H17A  2    0.623347   -0.001457    0.636751    11.00000   -1.50000 
H17B  2    0.614131    0.001332    0.550216    11.00000   -1.50000 
H17C  2    0.505837    0.016371    0.598245    11.00000   -1.50000 
AFIX   0 
C18   1    0.814778    0.126174    0.929427    11.00000    0.01409    0.01712 = 
         0.01234   -0.00130   -0.00273    0.00232 
C19   1    0.804516    0.078641    0.884159    11.00000    0.01682    0.01269 = 
         0.01411    0.00190   -0.00009   -0.00199 
AFIX  43 
H19   2    0.755505    0.047875    0.892955    11.00000   -1.20000 
AFIX   0 
C20   1    0.877072    0.083305    0.824265    11.00000    0.01702    0.01440 = 
         0.01508    0.00000   -0.00525    0.00308 
C21   1    0.928605    0.136285    0.829625    11.00000    0.01429    0.01775 = 
         0.01647    0.00252    0.00195    0.00227 
AFIX  43 
H21   2    0.979457    0.151597    0.795286    11.00000   -1.20000 
AFIX   0 
C22   1    0.892907    0.163744    0.894689    11.00000    0.01720    0.01491 = 
         0.01613   -0.00111   -0.00549   -0.00019 
C23   1    0.771856    0.124114    1.008095    11.00000    0.02211    0.01523 = 
         0.01663    0.00187    0.00180   -0.00056 
C24   1    0.694660    0.172767    1.032518    11.00000    0.03406    0.01917 = 
         0.01678   -0.00482    0.00504    0.00000 
AFIX 137 
H24A  2    0.727077    0.208275    1.016308    11.00000   -1.50000 
H24B  2    0.689719    0.172752    1.085491    11.00000   -1.50000 
H24C  2    0.618272    0.168099    1.011229    11.00000   -1.50000 
AFIX   0 
C25   1    0.877092    0.119668    1.059048    11.00000    0.03192    0.02537 = 
         0.01312    0.00191   -0.00123    0.00271 
AFIX 137 
H25A  2    0.924990    0.088424    1.043693    11.00000   -1.50000 
H25B  2    0.852042    0.113327    1.108819    11.00000   -1.50000 
H25C  2    0.920984    0.154432    1.056946    11.00000   -1.50000 
AFIX   0 
C26   1    0.704600    0.069671    1.021491    11.00000    0.02565    0.01907 = 
         0.01700    0.00182    0.00514   -0.00096 
AFIX 137 
H26A  2    0.639928    0.067564    0.987420    11.00000   -1.50000 
H26B  2    0.676506    0.069460    1.071258    11.00000   -1.50000 
H26C  2    0.754725    0.037470    1.014290    11.00000   -1.50000 
AFIX   0 
C27   1    0.917506    0.034832    0.777748    11.00000    0.02472    0.01402 = 
         0.01842   -0.00087    0.00344    0.00608 
C28   1    0.997663   -0.001057    0.826735    11.00000    0.03054    0.02607 = 
         0.03376    0.00099   -0.00105    0.01201 
AFIX 137 
H28A  2    1.061750    0.021869    0.843882    11.00000   -1.50000 
H28B  2    1.026593   -0.032721    0.798820    11.00000   -1.50000 
H28C  2    0.955176   -0.014943    0.868385    11.00000   -1.50000 
AFIX   0 
C29   1    0.818518   -0.001960    0.753841    11.00000    0.03994    0.01131 = 
         0.02139   -0.00565    0.00094    0.00214 
AFIX 137 
H29A  2    0.779059   -0.016011    0.796605    11.00000   -1.50000 
H29B  2    0.847329   -0.033497    0.725637    11.00000   -1.50000 
H29C  2    0.765282    0.019882    0.723853    11.00000   -1.50000 
AFIX   0 
C30   1    0.987197    0.055302    0.713621    11.00000    0.03726    0.02671 = 
         0.02510   -0.00663    0.00780    0.00592 
AFIX 137 
H30A  2    0.942612    0.082676    0.685753    11.00000   -1.50000 
H30B  2    1.006014    0.023583    0.682435    11.00000   -1.50000 
H30C  2    1.057652    0.072772    0.731559    11.00000   -1.50000 
AFIX   0 
C31   1    0.962383    0.215585    0.919370    11.00000    0.02277    0.01919 = 
         0.01862    0.00118   -0.00549   -0.00878 
C32   1    0.988553    0.253971    0.855294    11.00000    0.02725    0.02231 = 
         0.02703    0.00208   -0.01092   -0.00883 
AFIX 137 
H32A  2    1.034541    0.285658    0.872267    11.00000   -1.50000 
H32B  2    0.917009    0.267732    0.833869    11.00000   -1.50000 
H32C  2    1.030849    0.233076    0.818761    11.00000   -1.50000 
AFIX   0 
C33   1    0.907303    0.252383    0.976983    11.00000    0.03275    0.01986 = 
         0.02509   -0.00807   -0.00577   -0.00912 
AFIX 137 
H33A  2    0.898008    0.230804    1.021638    11.00000   -1.50000 
H33B  2    0.832530    0.265111    0.959366    11.00000   -1.50000 
H33C  2    0.956109    0.284792    0.986827    11.00000   -1.50000 
AFIX   0 
C34   1    1.076980    0.193721    0.948616    11.00000    0.02772    0.03183 = 
         0.02743    0.00055   -0.00835   -0.00474 
AFIX 137 
H34A  2    1.063963    0.169803    0.990792    11.00000   -1.50000 
H34B  2    1.125394    0.225307    0.962924    11.00000   -1.50000 
H34C  2    1.114792    0.172087    0.910814    11.00000   -1.50000 
AFIX   0 
C35   1    0.781001    0.234740    0.578248    11.00000    0.02184    0.02077 = 
         0.01577    0.00002    0.00020    0.00892 
AFIX  43 
H35   2    0.704079    0.247059    0.575872    11.00000   -1.20000 
AFIX   0 
C36   1    0.839534    0.225623    0.514801    11.00000    0.03679    0.02572 = 
         0.01031    0.00100    0.00084    0.00625 
AFIX  43 
H36   2    0.802513    0.231865    0.469408    11.00000   -1.20000 
AFIX   0 
C37   1    0.951811    0.207448    0.516804    11.00000    0.03116    0.02317 = 
         0.01895    0.00175    0.01151    0.00482 
AFIX  43 
H37   2    0.991915    0.201310    0.473148    11.00000   -1.20000 
AFIX   0 
C38   1    1.004066    0.198470    0.582742    11.00000    0.02274    0.02056 = 
         0.02634   -0.00068    0.00618    0.00465 
AFIX  43 
H38   2    1.080966    0.186092    0.584754    11.00000   -1.20000 
AFIX   0 
C39   1    0.945514    0.207322    0.646469    11.00000    0.01909    0.01970 = 
         0.01518   -0.00177   -0.00118   -0.00295 
AFIX  43 
H39   2    0.982714    0.200433    0.691644    11.00000   -1.20000 
AFIX   0 
C40   1    0.833105    0.226137    0.645502    11.00000    0.02240    0.01071 = 
         0.01415    0.00105    0.00397   -0.00198 
C41   1    0.772823    0.237631    0.714404    11.00000    0.01493    0.01763 = 
         0.01171   -0.00295   -0.00054    0.00168 
C42   1    0.750259    0.291665    0.730244    11.00000    0.01298    0.01905 = 
         0.01205   -0.00010   -0.00021   -0.00137 
C43   1    0.780186    0.339214    0.680509    11.00000    0.02438    0.01363 = 
         0.01142   -0.00247    0.00497   -0.00178 
C44   1    0.700230    0.363670    0.635900    11.00000    0.02689    0.02140 = 
         0.02227    0.00303   -0.00275   -0.00404 
AFIX  43 
H44   2    0.622710    0.352548    0.638789    11.00000   -1.20000 
AFIX   0 
C45   1    0.731183    0.404398    0.586682    11.00000    0.04695    0.01563 = 
         0.01926    0.00184   -0.00298    0.00092 
AFIX  43 
H45   2    0.674888    0.420277    0.555449    11.00000   -1.20000 
AFIX   0 
C46   1    0.841904    0.422098    0.582427    11.00000    0.05306    0.01347 = 
         0.02321    0.00041    0.01943   -0.00022 
AFIX  43 
H46   2    0.862842    0.450350    0.549012    11.00000   -1.20000 
AFIX   0 
C47   1    0.921381    0.398221    0.627273    11.00000    0.02986    0.02217 = 
         0.05506    0.00247    0.01952   -0.00411 
AFIX  43 
H47   2    0.998446    0.410162    0.624883    11.00000   -1.20000 
AFIX   0 
C48   1    0.892236    0.356957    0.676213    11.00000    0.02139    0.02616 = 
         0.03689    0.00822    0.00370    0.00103 
AFIX  43 
H48   2    0.949067    0.340826    0.706825    11.00000   -1.20000 
AFIX   0 
C49   1    0.701904    0.308918    0.800796    11.00000    0.01507    0.01553 = 
         0.01578    0.00031    0.00251    0.00257 
C50   1    0.666584    0.381339    0.884521    11.00000    0.06231    0.00970 = 
         0.03173    0.00358    0.02642    0.00303 
C51   1    0.744587    0.386848    0.941380    11.00000    0.08876    0.02514 = 
         0.02740   -0.00586    0.01533   -0.00586 
AFIX  43 
H51   2    0.820163    0.373363    0.936120    11.00000   -1.20000 
AFIX   0 
C52   1    0.712728    0.412004    1.006028    11.00000    0.13556    0.03995 = 
         0.03728   -0.00295    0.02421   -0.02075 
AFIX  43 
H52   2    0.766209    0.415538    1.044883    11.00000   -1.20000 
AFIX   0 
C53   1    0.606558    0.431140    1.013116    11.00000    0.14644    0.02820 = 
         0.05497    0.00214    0.05640   -0.00519 
AFIX  43 
H53   2    0.585951    0.448095    1.057596    11.00000   -1.20000 
AFIX   0 
C54   1    0.527759    0.427363    0.959840    11.00000    0.09772    0.02883 = 
         0.08231    0.01306    0.06268    0.01797 
AFIX  43 
H54   2    0.453037    0.441559    0.966522    11.00000   -1.20000 
AFIX   0 
C55   1    0.558152    0.401633    0.892915    11.00000    0.07409    0.03090 = 
         0.04553    0.00968    0.03613    0.00828 
AFIX  43 
H55   2    0.503702    0.398602    0.854532    11.00000   -1.20000 
AFIX   0 
N1    3    0.702108    0.360790    0.816951    11.00000    0.04002    0.01304 = 
         0.01873    0.00045    0.01326    0.00246 
S1    4    0.650619    0.256982    0.861539    11.00000    0.02401    0.01178 = 
         0.01577    0.00157    0.00628   -0.00099 
TH1   5    0.700212    0.158963    0.792017    11.00000    0.01385    0.01078 = 
         0.01325   -0.00007   -0.00072   -0.00019 
HKLF 4 
  
REM  131104a_0m in P2(1)/n 
REM R1 =  0.0289 for    7640 Fo > 4sig(Fo)  and  0.0412 for all    9359 data 
REM    541 parameters refined using     36 restraints 
  
END 
  
WGHT      0.0303      0.0000 
  
REM Highest difference peak  0.799,  deepest hole -0.602,  1-sigma level  0.098 
Q1    1   0.6996  0.1639  0.7394  11.00000  0.05    0.80 
Q2    1   0.7870  0.1623  0.8060  11.00000  0.05    0.78 
Q3    1   0.6195  0.1585  0.7807  11.00000  0.05    0.68 
Q4    1   0.7280  0.1951  0.7673  11.00000  0.05    0.54 
Q5    1   0.7028  0.1576  0.8432  11.00000  0.05    0.54 
Q6    1   0.4673  0.4211  0.9367  11.00000  0.05    0.53 
Q7    1   0.6694  0.1932  0.8200  11.00000  0.05    0.51 
Q8    1   0.7392  0.1283  0.7624  11.00000  0.05    0.49 
Q9    1   0.5397  0.4310  0.9992  11.00000  0.05    0.46 
Q10   1   0.9069  0.0580  0.8114  11.00000  0.05    0.46 
Q11   1   0.6539  0.4226  0.9856  11.00000  0.05    0.44 
Q12   1   0.6510  0.4310  1.0340  11.00000  0.05    0.42 
Q13   1   0.6638  0.1254  0.8159  11.00000  0.05    0.41 
Q14   1   0.5680  0.4262  0.9668  11.00000  0.05    0.40 
Q15   1   0.8833  0.1634  0.8359  11.00000  0.05    0.39 
Q16   1   0.6096 -0.0139  0.6273  11.00000  0.05    0.38 
Q17   1   0.7447  0.4056  1.0189  11.00000  0.05    0.37 
Q18   1   0.8429  0.2506  0.5544  11.00000  0.05    0.37 
Q19   1   0.7767  0.3257  0.7094  11.00000  0.05    0.37 
Q20   1   0.8259  0.0968  0.9143  11.00000  0.05    0.36 
Q21   1   0.7782  0.1689  0.7674  11.00000  0.05    0.36 
Q22   1   0.5042 -0.0075  0.6268  11.00000  0.05    0.36 
Q23   1   0.7581  0.3403  0.6376  11.00000  0.05    0.36 
Q24   1   0.9232  0.1927  0.9128  11.00000  0.05    0.36 
Q25   1   0.6172  0.1068  0.7176  11.00000  0.05    0.36 
Q26   1   0.3511 -0.0632  0.7424  11.00000  0.05    0.35 
Q27   1   1.2567 -0.0569  0.7008  11.00000  0.05    0.35 
Q28   1   0.9533  0.1884  0.5533  11.00000  0.05    0.35 
Q29   1   0.7747  0.2157  0.7375  11.00000  0.05    0.35 
Q30   1   0.7232  0.0074  0.7784  11.00000  0.05    0.34 
Q31   1   1.0203  0.0822  0.6954  11.00000  0.05    0.34 
Q32   1   0.5579  0.2652  0.8238  11.00000  0.05    0.34 
Q33   1   0.7786 -0.0132  0.7017  11.00000  0.05    0.34 
Q34   1   0.8125  0.2324  0.6892  11.00000  0.05    0.34 
Q35   1   0.2785 -0.0127  0.7156  11.00000  0.05    0.33 
Q36   1   0.5184  0.3934  0.8677  11.00000  0.05    0.33 
Q37   1   0.8230  0.3568  0.6892  11.00000  0.05    0.33 
Q38   1   0.2063  0.3920  0.7580  11.00000  0.05    0.33 
Q39   1   0.3589  0.1016  0.8282  11.00000  0.05    0.33 
Q40   1   0.4642  0.1062  0.8036  11.00000  0.05    0.33 
Q41   1   0.8216  0.0788  0.8436  11.00000  0.05    0.33 
Q42   1   0.6672  0.3364  0.7967  11.00000  0.05    0.33 
Q43   1   0.4055 -0.0765  0.6936  11.00000  0.05    0.33 
Q44   1   0.7387  0.2975  0.7608  11.00000  0.05    0.33 
Q45   1   0.8417  0.0356  0.6407  11.00000  0.05    0.32 
Q46   1   1.0172  0.2075  0.9355  11.00000  0.05    0.32 
Q47   1   0.3067  0.4234  0.8347  11.00000  0.05    0.32 
Q48   1   0.6862  0.1269  1.0746  11.00000  0.05    0.32 
Q49   1   0.8942  0.3835  0.6609  11.00000  0.05    0.32 
Q50   1   0.9260  0.0979  0.8368  11.00000  0.05    0.32 
; 
_shelx_res_checksum   67786 
  
_shelx_hkl_file 
; 
  -2   0   0  359.59    7.85 
  -3   0   0   -0.19    0.25 
  -4   0   0  146.07    3.98 
  -5   0   0   -0.79    0.36 
  -6   0   0    7.03    1.06 
  -6   0   0    8.26    1.03 
  -7   0   0    0.21    0.59 
  -7   0   0    0.06    0.62 
  -8   0   0  143.15    5.02 
  -8   0   0  148.91    4.92 
  -9   0   0    0.74    0.88 
  -9   0   0   -0.03    0.70 
 -10   0   0  117.25    4.66 
 -10   0   0  115.91    4.83 
 -11   0   0   -0.15    1.00 
 -11   0   0   -0.60    0.86 
 -12   0   0   55.36    3.49 
 -13   0   0   -0.68    1.06 
 -14   0   0   10.45    2.19 
  -1  -1   0   21.58    0.66 
  -1   1   0   21.52    0.74 
  -2  -1   0   11.32    0.60 
  -2   1   0   10.93    0.64 
  -3  -1   0   43.24    1.53 
  -3  -1   0   42.05    1.68 
  -3   1   0   42.72    1.60 
  -4  -1   0  326.41    7.78 
  -4  -1   0  342.75    8.07 
  -4   1   0  336.33    7.94 
  -5  -1   0   25.02    1.41 
  -5  -1   0   28.18    1.63 
  -5   1   0   29.14    1.56 
  -6  -1   0   76.35    2.85 
  -6  -1   0   74.63    3.03 
  -6   1   0   79.28    2.94 
  -7  -1   0   38.77    2.32 
  -7  -1   0   40.64    2.12 
  -7   1   0   38.55    2.16 
  -8  -1   0   25.18    2.06 
  -8  -1   0   25.79    1.87 
  -8   1   0   26.75    1.99 
  -9  -1   0    1.29    0.89 
  -9  -1   0    3.36    1.05 
  -9   1   0    1.02    0.76 
 -10  -1   0    3.45    1.30 
 -10  -1   0    4.08    1.20 
 -10   1   0    5.81    1.36 
 -11  -1   0   -0.38    1.01 
 -11  -1   0    1.02    1.03 
 -11   1   0    0.95    0.95 
 -12  -1   0   14.04    2.31 
 -12  -1   0   16.19    2.15 
 -12   1   0   10.63    1.95 
 -13  -1   0   14.56    2.24 
 -13  -1   0   13.94    2.38 
 -13   1   0   13.07    2.23 
 -14   1   0   48.54    3.69 
  -1  -2   0  385.23    8.09 
  -1   2   0  370.78    8.15 
  -2  -2   0   41.94    1.51 
  -2  -2   0   41.82    1.28 
  -2   2   0   40.73    1.44 
  -3  -2   0   30.53    1.23 
  -3  -2   0   31.18    1.45 
  -3   2   0   30.98    1.36 
  -4  -2   0    0.23    0.33 
  -4  -2   0    0.16    0.40 
  -4   2   0   -0.22    0.35 
  -4   2   0    0.32    0.35 
  -5  -2   0    2.29    0.72 
  -5  -2   0    2.23    0.60 
  -5   2   0    1.67    0.55 
  -5   2   0    1.72    0.60 
  -6  -2   0   10.90    1.32 
  -6  -2   0   12.62    1.13 
  -6   2   0   12.06    1.23 
  -6   2   0   12.96    1.20 
  -7  -2   0   37.20    2.01 
  -7  -2   0   31.50    2.18 
  -7   2   0   37.45    2.05 
  -7   2   0   36.34    2.12 
  -8  -2   0   17.32    1.87 
  -8  -2   0   16.27    1.55 
  -8   2   0   15.02    1.60 
  -9  -2   0  115.22    4.26 
  -9  -2   0  109.89    4.63 
  -9   2   0  107.02    4.40 
 -10  -2   0    5.67    1.31 
 -10  -2   0    6.72    1.57 
 -10   2   0    5.44    1.36 
 -11  -2   0   54.28    3.62 
 -11  -2   0   61.41    3.34 
 -11   2   0   55.31    3.39 
 -12  -2   0    8.89    1.71 
 -12  -2   0    9.37    2.01 
 -12   2   0   11.03    1.89 
 -13  -2   0   26.27    3.03 
 -13  -2   0   23.03    2.54 
 -13   2   0   24.98    2.78 
 -14   2   0    2.52    1.53 
 -15   2   0    3.11    1.74 
  -1   3   0   25.25    0.97 
   1   3   0   23.60    0.73 
  -2  -3   0   73.39    1.90 
   2  -3   0   69.05    1.98 
  -2   3   0   72.03    2.19 
   3  -3   0   96.28    2.60 
  -3  -3   0   98.91    2.62 
  -3  -3   0   96.63    3.00 
  -3   3   0   91.37    2.87 
  -4  -3   0    0.43    0.36 
  -4  -3   0    0.54    0.52 
  -4   3   0    0.52    0.43 
  -4   3   0    1.10    0.40 
  -5  -3   0  267.48    6.67 
  -5  -3   0  268.17    7.22 
  -5   3   0  267.58    6.63 
  -5   3   0  286.87    7.17 
  -6  -3   0   25.36    1.50 
  -6  -3   0   26.17    1.82 
  -6   3   0   24.08    1.52 
  -6   3   0   23.46    1.63 
  -7  -3   0   92.46    3.83 
  -7  -3   0   88.47    3.28 
  -7   3   0   92.29    3.61 
  -7   3   0   95.52    3.37 
  -8  -3   0    2.63    0.84 
  -8  -3   0    5.21    1.28 
  -8   3   0    5.17    1.03 
  -8   3   0    5.69    1.17 
  -9  -3   0   19.66    2.14 
  -9  -3   0   19.31    1.75 
  -9   3   0   16.81    1.84 
  -9   3   0   21.04    1.84 
 -10  -3   0    0.39    0.84 
 -10  -3   0   -0.58    0.96 
 -10   3   0   -0.27    0.77 
 -10   3   0   -0.54    0.79 
 -11  -3   0    4.72    1.58 
 -11  -3   0    9.55    1.61 
 -11   3   0   12.79    1.91 
 -12  -3   0    0.53    1.05 
 -12  -3   0   -0.21    1.27 
 -12   3   0    0.09    1.05 
 -13  -3   0   34.83    3.45 
 -13   3   0   41.62    3.37 
 -14  -3   0    1.45    1.79 
 -14   3   0    0.71    1.45 
 -15   3   0   28.37    3.34 
   1  -4   0   38.77    1.35 
  -1   4   0   39.62    1.40 
   1   4   0   39.30    1.11 
   2  -4   0  178.90    4.27 
  -2  -4   0  180.65    4.11 
  -2  -4   0  174.28    4.56 
  -2   4   0  184.93    4.56 
  -3  -4   0   16.81    0.84 
  -3  -4   0   13.66    1.06 
   3  -4   0   16.30    0.93 
  -3   4   0   14.04    1.04 
  -4  -4   0   25.80    1.56 
  -4  -4   0   25.99    1.22 
   4  -4   0   26.86    1.27 
  -4   4   0   25.40    1.13 
  -4   4   0   27.01    1.52 
  -5  -4   0    0.17    0.37 
  -5  -4   0   -0.44    0.39 
  -5   4   0    0.37    0.49 
  -5   4   0   -0.18    0.33 
  -6  -4   0    1.58    0.59 
  -6  -4   0    2.39    0.83 
  -6   4   0    2.42    0.62 
  -6   4   0    1.59    0.64 
  -7  -4   0   77.97    3.59 
  -7  -4   0   87.13    3.17 
  -7   4   0   89.29    3.58 
  -7   4   0   89.03    3.15 
  -8  -4   0   66.45    2.87 
  -8  -4   0   63.41    3.35 
  -8   4   0   65.13    2.84 
  -8   4   0   70.11    3.26 
  -9  -4   0   53.57    3.32 
  -9  -4   0   62.55    2.88 
  -9   4   0   54.45    3.10 
  -9   4   0   53.21    2.77 
 -10  -4   0   91.19    4.49 
 -10  -4   0   86.05    3.74 
 -10   4   0   82.87    4.11 
 -11  -4   0   35.13    2.47 
 -11  -4   0   28.56    2.84 
 -11   4   0   29.48    2.69 
 -12  -4   0   43.91    3.45 
 -12  -4   0   37.22    2.75 
 -12   4   0   38.10    3.02 
 -13  -4   0   22.90    3.07 
 -13   4   0   15.24    2.43 
 -14  -4   0    0.02    1.53 
 -14   4   0   -0.24    1.20 
 -15   4   0   -1.11    1.30 
   0  -5   0   -0.13    0.23 
   1  -5   0   65.24    2.02 
  -1  -5   0   68.55    2.09 
  -1   5   0   66.65    2.09 
   1   5   0   66.66    1.78 
  -2  -5   0  127.13    3.55 
   2  -5   0  128.31    3.32 
  -2   5   0  122.21    3.48 
   2   5   0  122.74    2.98 
  -3  -5   0   75.10    2.70 
   3  -5   0   78.30    2.43 
  -3  -5   0   77.63    2.19 
  -3   5   0   78.47    2.67 
  -4  -5   0  250.36    6.83 
   4  -5   0  265.71    6.24 
  -4  -5   0  261.12    6.16 
  -4   5   0  264.52    6.78 
  -5  -5   0   23.36    1.30 
  -5  -5   0   24.60    1.73 
  -5   5   0   26.98    1.72 
  -5   5   0   24.64    1.28 
  -6  -5   0  254.37    7.42 
  -6  -5   0  257.92    6.61 
  -6   5   0  266.06    6.49 
  -6   5   0  266.82    7.32 
  -7  -5   0   10.09    1.52 
  -7  -5   0    9.33    1.08 
  -7   5   0    7.88    0.98 
  -7   5   0   11.33    1.45 
  -8  -5   0   64.16    3.43 
  -8  -5   0   60.13    2.68 
  -8   5   0   60.53    2.63 
  -8   5   0   61.27    3.17 
  -9  -5   0   11.42    1.87 
  -9  -5   0    7.73    1.24 
  -9   5   0   12.41    1.72 
 -10  -5   0   -0.10    0.95 
 -10  -5   0   -0.24    0.79 
 -10   5   0    1.20    1.01 
 -11  -5   0    1.87    1.28 
 -11  -5   0    0.29    0.88 
 -11   5   0    0.37    1.02 
 -12  -5   0   27.72    3.07 
 -12   5   0   27.36    2.80 
 -13  -5   0    8.95    2.44 
 -13   5   0    7.31    1.96 
 -14  -5   0   44.62    4.21 
 -14   5   0   41.46    3.75 
 -15  -5   0   -1.96    1.70 
 -15   5   0    1.18    1.61 
   0  -6   0    6.38    0.64 
  -1  -6   0    1.79    0.40 
  -1  -6   0    1.98    0.46 
  -1   6   0    1.88    0.48 
   1   6   0    2.18    0.35 
  -2  -6   0   79.82    2.70 
   2  -6   0   83.45    2.57 
   2   6   0   88.57    2.24 
  -2   6   0   89.05    2.77 
  -3  -6   0    3.05    0.69 
   3  -6   0    3.19    0.60 
  -3  -6   0    3.22    0.44 
  -3   6   0    2.95    0.64 
  -4  -6   0   57.69    1.93 
   4  -6   0   57.85    2.15 
  -4  -6   0   55.06    2.49 
  -4   6   0   55.01    2.38 
  -5  -6   0   14.27    1.50 
   5  -6   0   10.42    1.02 
  -5  -6   0   13.50    1.00 
  -5   6   0   11.01    0.84 
  -5   6   0   12.05    1.28 
  -6  -6   0   13.88    1.12 
  -6  -6   0   11.81    1.53 
  -6   6   0   13.96    1.01 
  -6   6   0   14.85    1.54 
  -7  -6   0    0.27    0.52 
  -7  -6   0   -0.01    0.67 
  -7   6   0    0.79    0.51 
  -7   6   0    0.23    0.64 
  -8  -6   0   84.69    4.11 
  -8  -6   0   97.82    3.48 
  -8   6   0   96.42    4.12 
  -9  -6   0    6.57    1.17 
  -9  -6   0    6.95    1.68 
  -9   6   0    6.02    1.43 
 -10  -6   0  159.47    5.38 
 -10  -6   0  173.01    6.60 
 -10   6   0  157.92    6.05 
 -11  -6   0    2.94    1.43 
 -11   6   0    5.28    1.57 
 -12  -6   0   57.79    4.05 
 -12   6   0   61.31    3.96 
 -13  -6   0   -0.60    1.40 
 -13   6   0   -0.01    1.22 
 -14  -6   0    0.16    1.74 
 -14   6   0    1.35    1.49 
 -15  -6   0   -0.48    1.72 
 -15   6   0   -2.16    1.32 
   0  -7   0    0.27    0.31 
  -1  -7   0  110.11    3.20 
   1  -7   0  114.70    3.23 
  -1  -7   0  113.57    3.09 
   1   7   0  114.18    2.91 
   2  -7   0   91.78    2.82 
  -2  -7   0   86.40    2.91 
   2   7   0   95.34    2.43 
  -2   7   0   89.85    2.92 
  -3  -7   0   20.23    1.07 
  -3  -7   0   18.18    1.33 
   3  -7   0   19.94    1.22 
  -3   7   0   20.35    1.35 
   3   7   0   22.14    0.96 
  -4  -7   0  104.95    3.78 
  -4  -7   0  111.09    3.05 
   4  -7   0  113.40    3.41 
  -4   7   0  110.64    3.75 
  -5  -7   0  131.57    4.56 
   5  -7   0  132.86    3.98 
  -5  -7   0  131.64    3.70 
  -5   7   0  135.42    4.46 
  -6  -7   0  109.05    4.24 
  -6  -7   0  105.83    3.32 
  -6   7   0  105.97    3.03 
  -6   7   0  103.69    4.01 
  -7  -7   0   57.17    3.08 
  -7  -7   0   48.58    2.19 
  -7   7   0   50.31    2.82 
  -8  -7   0   49.78    2.36 
  -8  -7   0   47.30    3.04 
  -8   7   0   52.33    2.96 
  -9  -7   0    4.01    1.30 
  -9  -7   0    2.88    0.94 
  -9   7   0    2.72    1.13 
 -10  -7   0    0.80    1.03 
 -10   7   0   -0.36    0.96 
 -11  -7   0    0.10    1.04 
 -11   7   0    0.80    1.08 
 -12  -7   0   14.84    2.59 
 -12   7   0   15.69    2.47 
 -13  -7   0   16.97    2.86 
 -13   7   0   22.97    2.93 
 -14  -7   0   21.32    3.42 
 -14   7   0   31.01    3.40 
   0  -8   0   21.60    1.08 
   0  -8   0   23.74    1.29 
   0   8   0   23.22    1.16 
   1  -8   0  317.79    7.34 
  -1  -8   0  309.72    7.36 
  -1  -8   0  300.52    7.14 
   1   8   0  314.12    7.06 
   2  -8   0    0.51    0.41 
  -2  -8   0    0.31    0.42 
  -2   8   0    1.17    0.49 
   2   8   0    0.99    0.33 
   3  -8   0   97.96    3.19 
  -3  -8   0   98.87    3.44 
  -3   8   0  101.19    3.42 
   3   8   0  104.09    2.73 
  -4  -8   0   16.56    1.04 
   4  -8   0   14.94    1.19 
  -4  -8   0   16.96    1.52 
   4   8   0   14.11    0.92 
  -4   8   0   17.41    1.41 
   5  -8   0    0.59    0.52 
  -5  -8   0    0.53    0.58 
  -5  -8   0    0.38    0.40 
  -5   8   0    0.71    0.70 
   6  -8   0    1.33    0.66 
  -6  -8   0    1.58    0.81 
  -6  -8   0    0.98    0.54 
  -6   8   0    2.45    0.84 
  -7  -8   0   21.13    2.12 
  -7  -8   0   25.28    1.57 
  -7   8   0   21.91    2.01 
  -8  -8   0    2.67    1.18 
  -8  -8   0    1.40    0.72 
  -8   8   0    2.01    1.07 
  -9  -8   0  126.98    5.42 
  -9  -8   0  120.20    4.19 
  -9   8   0  121.80    5.15 
 -10  -8   0    3.47    1.51 
 -10   8   0    2.88    1.23 
 -11  -8   0   53.97    3.81 
 -11   8   0   52.12    3.52 
 -12  -8   0    5.89    1.91 
 -12   8   0   10.60    2.13 
 -13  -8   0   18.05    2.97 
 -13   8   0   21.10    2.91 
 -14  -8   0   -0.53    1.73 
 -14   8   0    0.26    1.43 
   0  -9   0    0.17    0.37 
   0  -9   0   -0.12    0.29 
   0   9   0   -0.02    0.33 
  -1  -9   0   51.84    2.04 
  -1  -9   0   53.07    2.04 
   1   9   0   56.01    1.87 
  -2  -9   0    6.40    0.89 
   2  -9   0    5.15    0.80 
  -2   9   0    5.58    0.85 
   2   9   0    4.76    0.55 
   3  -9   0  229.40    5.87 
  -3  -9   0  212.45    6.11 
   3   9   0  235.12    5.27 
  -3   9   0  205.79    6.01 
  -4  -9   0  119.20    4.25 
   4  -9   0  124.70    3.88 
  -4  -9   0  119.45    3.45 
  -4   9   0  118.85    4.12 
   4   9   0  118.91    3.25 
   5  -9   0  362.93    9.08 
  -5  -9   0  377.70    9.96 
   5   9   0  378.37    8.64 
  -5   9   0  385.18    9.87 
  -6  -9   0   13.48    1.10 
   6  -9   0   15.57    1.44 
  -6  -9   0   13.12    1.69 
  -6   9   0   14.03    1.62 
  -7  -9   0   79.96    2.91 
  -7  -9   0   81.17    3.95 
  -7   9   0   82.53    3.76 
  -8  -9   0    1.20    0.71 
  -8  -9   0    2.01    1.10 
  -8   9   0    1.45    1.01 
  -9  -9   0    2.78    1.31 
  -9   9   0    2.74    1.24 
 -10  -9   0   -1.18    1.03 
 -10   9   0    1.24    1.13 
 -11  -9   0    0.25    1.30 
 -11   9   0   -1.74    0.83 
 -12  -9   0    1.21    1.44 
 -12   9   0    3.30    1.63 
 -13  -9   0   27.97    3.52 
 -13   9   0   37.00    3.59 
 -14  -9   0   14.94    2.90 
 -14   9   0    7.78    2.22 
   0 -10   0  119.46    3.65 
   0 -10   0  121.75    3.37 
   0  10   0  119.23    3.52 
  -1 -10   0   47.69    1.98 
  -1 -10   0   49.38    2.03 
   1 -10   0   45.23    2.05 
   1  10   0   45.78    1.76 
  -2 -10   0  141.46    4.01 
  -2 -10   0  145.82    4.35 
   2 -10   0  139.63    4.20 
  -2  10   0  143.33    4.35 
   2  10   0  138.52    3.68 
   3 -10   0   20.64    1.45 
  -3 -10   0   22.82    1.69 
  -3  10   0   23.06    1.60 
   3  10   0   23.79    1.15 
  -4 -10   0    0.51    0.62 
   4 -10   0    1.21    0.66 
  -4 -10   0    0.87    0.49 
  -4  10   0    1.56    0.74 
   4  10   0    0.90    0.43 
  -5 -10   0    5.95    1.20 
  -5 -10   0    6.16    0.83 
   5 -10   0    5.17    0.97 
  -5  10   0    4.58    1.05 
   5  10   0    6.14    0.73 
   6 -10   0   35.72    2.05 
  -6 -10   0   33.06    1.69 
  -6 -10   0   36.60    2.47 
   6  10   0   32.52    1.61 
  -6  10   0   36.09    2.41 
  -7 -10   0   13.44    1.18 
   7 -10   0   14.41    1.51 
  -7 -10   0   14.59    1.94 
  -7  10   0   12.96    1.76 
  -8 -10   0   41.51    2.98 
  -8  10   0   43.03    2.88 
  -9 -10   0   18.02    2.36 
  -9  10   0   13.16    2.01 
 -10 -10   0   59.44    3.96 
 -10  10   0   57.83    3.72 
 -11 -10   0   43.56    3.83 
 -11  10   0   43.44    3.32 
 -12 -10   0   32.77    3.58 
 -12  10   0   35.87    3.43 
 -13 -10   0    2.37    1.74 
 -13  10   0    4.53    1.78 
 -14 -10   0    4.19    2.31 
 -14  10   0    3.55    1.99 
   0 -11   0   -0.09    0.44 
   0 -11   0    0.21    0.38 
   0  11   0    0.43    0.46 
   1 -11   0   10.82    1.12 
  -1 -11   0    9.80    1.04 
   1 -11   0   10.64    0.79 
  -1 -11   0    9.93    1.00 
   1  11   0   11.10    0.92 
  -2 -11   0  105.74    3.64 
  -2 -11   0  106.17    3.41 
   2  11   0  115.57    3.15 
  -2  11   0  107.24    3.71 
   3 -11   0    9.66    1.15 
  -3 -11   0   10.14    1.25 
   3  11   0    9.41    0.78 
  -3  11   0    9.84    1.22 
  -4 -11   0  163.01    4.54 
   4 -11   0  170.09    5.02 
  -4 -11   0  160.47    5.30 
  -4  11   0  156.27    5.21 
   4  11   0  162.46    4.20 
  -5 -11   0    1.54    0.85 
   5 -11   0    1.84    0.74 
  -5 -11   0    1.93    0.65 
  -5  11   0    3.49    1.01 
   5  11   0    2.12    0.57 
  -6 -11   0  166.86    4.63 
   6 -11   0  168.36    5.22 
  -6 -11   0  165.04    5.87 
   6  11   0  163.07    4.49 
  -6  11   0  167.04    5.75 
  -7 -11   0    5.27    1.40 
   7 -11   0    5.12    1.08 
  -7  11   0    4.34    1.26 
  -8 -11   0   14.76    2.11 
  -8  11   0   12.26    1.89 
  -9 -11   0    1.45    1.19 
  -9  11   0    5.91    1.57 
 -10 -11   0   -0.14    1.14 
 -10  11   0    0.22    1.09 
 -11 -11   0    1.69    1.50 
 -11  11   0    0.34    1.21 
 -12 -11   0   13.85    2.64 
 -12  11   0   12.26    2.34 
 -13 -11   0    1.22    1.74 
 -13  11   0    0.60    1.59 
 -14 -11   0   53.84    4.89 
 -14  11   0   58.78    4.51 
   0 -12   0  257.69    6.24 
   0 -12   0  241.36    6.52 
   0  12   0  249.74    6.43 
   1 -12   0   96.25    2.70 
  -1 -12   0   92.42    3.16 
  -1 -12   0   85.28    3.14 
   1 -12   0   92.02    3.33 
   1  12   0   92.55    2.96 
  -2 -12   0  123.16    4.03 
   2 -12   0  116.66    3.97 
  -2 -12   0  124.34    3.87 
  -2  12   0  115.29    4.01 
   2  12   0  125.24    3.46 
  -3 -12   0   42.67    2.34 
   3 -12   0   44.00    2.25 
  -3  12   0   40.61    2.28 
   3  12   0   43.82    1.71 
  -4 -12   0    0.76    0.70 
   4 -12   0    1.06    0.67 
  -4  12   0    1.26    0.75 
   4  12   0    0.58    0.45 
  -5 -12   0   17.67    1.88 
  -5 -12   0   15.28    1.28 
   5 -12   0   15.21    1.54 
  -5  12   0   16.78    1.81 
   5  12   0   14.99    1.07 
  -6 -12   0   22.16    1.51 
  -6 -12   0   24.04    2.26 
   6 -12   0   22.50    1.78 
  -6  12   0   22.01    2.11 
  -7 -12   0   28.63    2.58 
   7 -12   0   34.13    2.25 
  -7  12   0   31.07    2.44 
  -8 -12   0   41.80    3.06 
  -8  12   0   39.04    2.88 
  -9 -12   0   42.71    3.35 
  -9  12   0   38.67    3.01 
 -10 -12   0   56.85    3.94 
 -10  12   0   59.54    3.84 
 -11 -12   0   19.00    2.88 
 -11  12   0   21.05    2.81 
 -12 -12   0   32.39    3.74 
 -12  12   0   35.31    3.50 
 -13 -12   0    9.45    2.51 
 -13  12   0    3.98    2.00 
 -14 -12   0    9.53    2.62 
   0 -13   0    0.63    0.48 
   0 -13   0    1.24    0.68 
   0  13   0    0.20    0.52 
   1 -13   0    9.46    1.20 
  -1 -13   0    7.98    1.09 
  -1 -13   0    8.66    1.04 
   1 -13   0    8.18    0.77 
   1  13   0    7.51    0.92 
  -2 -13   0   41.54    2.19 
  -2 -13   0   40.20    2.06 
   2 -13   0   41.57    2.22 
  -2  13   0   41.33    2.24 
   2  13   0   42.23    1.81 
  -3 -13   0   91.67    3.63 
   3 -13   0   91.76    3.54 
  -3 -13   0   97.29    3.35 
   3  13   0   94.50    2.89 
  -3  13   0   90.73    3.63 
  -4 -13   0   18.21    1.77 
   4 -13   0   17.33    1.63 
  -4  13   0   17.89    1.75 
   4  13   0   18.24    1.15 
  -5 -13   0  103.23    3.51 
  -5 -13   0  101.37    4.25 
   5 -13   0  107.71    4.04 
  -5  13   0  103.01    4.25 
   6 -13   0   27.18    2.03 
  -6 -13   0   27.10    2.45 
  -6 -13   0   25.72    1.69 
  -6  13   0   37.07    2.57 
   7 -13   0   74.97    3.48 
  -7 -13   0   73.60    3.94 
  -7  13   0   83.49    4.04 
  -8 -13   0   -0.22    0.93 
  -8  13   0   -0.24    0.93 
  -9 -13   0    9.31    2.01 
  -9  13   0   12.74    2.12 
 -10 -13   0   -1.69    1.09 
 -10  13   0   -0.48    1.06 
 -11 -13   0    5.23    2.06 
 -11  13   0    4.44    1.77 
 -12 -13   0    2.08    1.86 
 -12  13   0   -0.58    1.28 
 -13 -13   0   36.04    4.15 
 -13  13   0   40.36    3.93 
   0 -14   0    6.11    0.90 
   0 -14   0    3.93    0.93 
   0  14   0    5.03    0.91 
  -1 -14   0  184.75    5.47 
  -1 -14   0  185.67    5.33 
   1 -14   0  184.13    5.58 
   1 -14   0  196.82    4.84 
   1  14   0  180.24    5.10 
   2 -14   0    2.99    0.93 
  -2 -14   0    1.19    0.73 
  -2 -14   0    4.29    0.96 
   2  14   0    2.87    0.70 
  -2  14   0    1.18    0.73 
  -3 -14   0   61.01    2.69 
   3 -14   0   62.03    2.93 
  -3 -14   0   61.21    2.92 
  -3  14   0   67.53    3.06 
   3  14   0   62.55    2.28 
   4 -14   0    2.50    0.95 
  -4 -14   0    2.36    0.94 
   4  14   0    2.07    0.60 
  -4  14   0    2.40    0.92 
   5 -14   0    0.98    0.89 
  -5 -14   0    2.89    0.87 
  -5 -14   0    1.63    0.91 
  -5  14   0    1.13    0.99 
   6 -14   0    2.16    0.95 
  -6 -14   0    2.62    0.83 
  -6 -14   0    2.67    1.17 
  -6  14   0    5.32    1.35 
  -7 -14   0   40.49    3.02 
   7 -14   0   40.69    2.63 
  -7  14   0   37.50    2.84 
   8 -14   0    3.45    1.22 
  -8 -14   0    3.90    1.43 
  -8  14   0    2.31    1.23 
  -9 -14   0   94.16    5.01 
  -9  14   0   91.98    4.80 
 -10 -14   0    5.55    1.77 
 -10  14   0    4.23    1.66 
 -11 -14   0   87.32    5.30 
 -11  14   0   80.00    4.90 
 -12 -14   0    2.88    2.04 
 -12  14   0    7.14    2.05 
 -13 -14   0   17.91    3.20 
 -13  14   0   16.93    2.97 
   0 -15   0   -0.05    0.48 
   0 -15   0    0.66    0.65 
   0  15   0   -0.06    0.51 
  -1 -15   0   53.74    2.63 
   1 -15   0   55.44    2.06 
   1 -15   0   50.59    2.61 
  -1 -15   0   53.66    2.43 
   1  15   0   47.99    2.23 
   2 -15   0    5.29    1.07 
  -2 -15   0    5.19    1.05 
  -2 -15   0    4.42    1.00 
  -2  15   0    5.44    1.10 
   2  15   0    6.60    0.88 
  -3 -15   0   27.09    1.82 
  -3 -15   0   23.96    1.93 
   3 -15   0   27.56    2.05 
  -3  15   0   23.92    1.95 
   3  15   0   28.69    1.51 
  -4 -15   0   37.20    2.45 
   4 -15   0   37.66    2.36 
  -4  15   0   39.28    2.50 
  -5 -15   0  117.60    4.80 
  -5 -15   0  117.34    4.05 
   5 -15   0  121.63    4.57 
  -5  15   0  119.45    4.83 
   6 -15   0   77.10    3.58 
  -6 -15   0   73.37    3.12 
  -6 -15   0   70.80    3.87 
  -6  15   0   77.96    3.89 
  -7 -15   0   57.55    3.63 
   7 -15   0   55.10    3.08 
  -7  15   0   57.21    3.54 
  -8 -15   0   26.24    2.81 
   8 -15   0   27.04    2.37 
  -8  15   0   24.54    2.73 
  -9 -15   0    2.82    1.51 
  -9  15   0    4.84    1.66 
 -10 -15   0    3.16    1.61 
 -10  15   0    2.12    1.44 
 -11 -15   0    7.08    2.13 
 -11  15   0   10.06    2.25 
 -12 -15   0   10.77    2.54 
 -12  15   0   10.33    2.37 
 -13 -15   0   26.26    3.79 
   0 -16   0  147.87    4.35 
   0 -16   0  138.29    4.77 
   0  16   0  133.74    4.42 
  -1 -16   0   25.84    1.77 
   1 -16   0   28.92    1.51 
  -1 -16   0   26.65    1.93 
   1 -16   0   24.76    1.93 
   1  16   0   27.34    1.70 
  -2 -16   0   72.54    3.16 
   2 -16   0   68.76    3.21 
  -2 -16   0   77.70    3.24 
   2  16   0   70.12    2.70 
  -2  16   0   73.54    3.22 
   3 -16   0   21.93    1.95 
  -3 -16   0   18.94    1.85 
  -3 -16   0   21.88    1.78 
  -3  16   0   22.56    1.96 
  -4 -16   0   15.60    1.84 
   4 -16   0   19.32    1.90 
  -4  16   0   14.45    1.83 
  -5 -16   0    0.60    0.91 
   5 -16   0    0.72    0.86 
  -5  16   0   -0.28    0.87 
  -6 -16   0    0.13    0.76 
  -6 -16   0    1.99    1.07 
   6 -16   0    1.50    1.01 
  -6  16   0    5.04    1.35 
  -7 -16   0    0.37    1.03 
   7 -16   0    0.15    0.90 
  -7  16   0    1.19    1.11 
  -8 -16   0   72.27    4.24 
   8 -16   0   67.91    3.60 
  -8  16   0   69.26    4.11 
  -9 -16   0   14.69    2.53 
  -9  16   0   13.30    2.37 
 -10 -16   0   51.39    3.98 
 -10  16   0   52.40    3.98 
 -11 -16   0    8.18    2.25 
 -11  16   0    7.09    2.00 
 -12 -16   0   42.72    4.35 
 -12  16   0   48.63    4.33 
 -13 -16   0   -0.87    1.80 
   0 -17   0    1.06    0.78 
   0 -17   0    0.06    0.55 
   0  17   0    0.08    0.60 
  -1 -17   0    1.59    0.82 
   1 -17   0    3.06    1.02 
  -1 -17   0    3.16    0.90 
   1  17   0    3.42    0.86 
  -2 -17   0   13.70    1.59 
   2 -17   0   10.92    1.55 
  -2 -17   0   14.42    1.56 
   2  17   0   14.26    1.30 
   3 -17   0   32.93    2.32 
  -3 -17   0   31.33    2.16 
  -3 -17   0   29.37    2.23 
  -3  17   0   35.39    2.39 
  -4 -17   0  105.34    3.94 
  -4 -17   0  101.79    4.30 
   4 -17   0  100.78    4.23 
  -4  17   0   95.37    4.23 
   5 -17   0   11.43    1.74 
  -5 -17   0   10.01    1.75 
  -5  17   0   15.65    1.98 
  -6 -17   0   77.89    4.09 
   6 -17   0   80.48    3.84 
  -6 -17   0   81.41    3.44 
  -6  17   0   84.00    4.19 
  -7 -17   0    2.82    1.40 
   7 -17   0    1.79    1.06 
  -7  17   0    1.11    1.11 
   8 -17   0   33.91    2.64 
  -8 -17   0   41.24    3.47 
  -8  17   0   28.83    3.00 
  -9 -17   0    3.60    1.59 
  -9  17   0    1.52    1.53 
 -10 -17   0    1.05    1.41 
 -10  17   0   -1.63    1.29 
 -11 -17   0    1.74    1.71 
 -11  17   0    0.19    1.42 
 -12 -17   0   19.11    3.25 
 -12  17   0   11.40    2.65 
   0 -18   0   31.45    2.32 
   0  18   0   35.82    2.16 
   1 -18   0   45.88    2.71 
  -1 -18   0   44.70    2.43 
  -1 -18   0   43.46    2.61 
  -1  18   0   40.52    2.43 
   1  18   0   43.92    2.25 
   2 -18   0   28.00    2.18 
  -2 -18   0   26.11    2.03 
  -2 -18   0   29.50    2.19 
  -3 -18   0    5.83    1.29 
  -3 -18   0    5.42    1.27 
   3 -18   0    5.96    1.32 
  -3  18   0    3.07    1.10 
  -4 -18   0    8.88    1.61 
   4 -18   0    9.32    1.58 
  -4 -18   0   11.67    1.55 
  -4  18   0   12.43    1.88 
   5 -18   0    3.04    1.16 
  -5 -18   0    2.51    1.23 
  -5  18   0    4.95    1.40 
   6 -18   0    3.46    1.28 
  -6 -18   0    4.69    1.19 
  -6 -18   0    4.30    1.38 
  -6  18   0    2.39    1.30 
  -7 -18   0   37.43    3.24 
   7 -18   0   39.58    2.83 
  -7  18   0   33.82    3.01 
  -8 -18   0   20.70    2.78 
   8 -18   0   16.85    2.21 
  -8  18   0   18.38    2.61 
  -9 -18   0   17.60    2.72 
  -9  18   0   17.04    2.77 
 -10 -18   0   26.54    3.38 
 -10  18   0   29.02    3.39 
 -11 -18   0   20.56    3.16 
 -11  18   0   22.64    3.32 
 -12 -18   0   15.04    3.07 
   0 -19   0    0.56    0.89 
   0  19   0   -1.53    0.64 
   1 -19   0   17.48    2.00 
  -1 -19   0   21.10    1.80 
  -1 -19   0   18.93    1.98 
  -1  19   0   16.84    1.75 
  -2 -19   0   -0.35    0.78 
  -2 -19   0    0.34    0.88 
   2 -19   0    2.11    1.04 
  -3 -19   0  157.92    5.60 
  -3 -19   0  157.46    5.45 
   3 -19   0  147.96    5.58 
  -3  19   0  160.83    5.66 
  -4 -19   0    1.29    1.06 
   4 -19   0    1.35    0.97 
  -4 -19   0    2.40    1.03 
  -4  19   0    0.40    1.03 
  -5 -19   0  120.15    5.11 
   5 -19   0  113.98    4.92 
  -5  19   0  123.98    5.21 
  -6 -19   0    2.57    1.39 
   6 -19   0    3.11    1.27 
  -6  19   0    4.56    1.50 
  -7 -19   0   92.62    4.90 
   7 -19   0   93.51    4.54 
  -7  19   0   95.57    4.85 
   8 -19   0    4.07    1.43 
  -8 -19   0    3.67    1.71 
  -8  19   0    5.43    1.75 
   9 -19   0    9.42    1.91 
  -9 -19   0   11.82    2.38 
  -9  19   0    9.81    2.33 
 -10 -19   0    3.15    1.81 
 -10  19   0   -1.07    1.48 
 -11 -19   0    5.88    2.15 
 -11  19   0   -1.33    1.45 
 -12 -19   0   -0.01    1.62 
   0 -20   0   20.39    2.13 
   0  20   0   20.32    1.78 
  -1 -20   0  123.03    4.83 
   1 -20   0  123.13    4.92 
  -1  20   0  120.92    4.54 
   2 -20   0    6.49    1.47 
  -2 -20   0    7.61    1.46 
  -2 -20   0    6.75    1.37 
   3 -20   0   21.66    2.31 
  -3 -20   0   19.04    2.05 
  -3 -20   0   22.14    2.12 
  -3  20   0   17.45    2.01 
   4 -20   0    5.46    1.43 
  -4 -20   0    4.23    1.28 
  -4 -20   0    7.65    1.58 
  -4  20   0    7.25    1.66 
  -5 -20   0    2.09    1.23 
   5 -20   0    1.91    1.17 
  -5  20   0    4.10    1.39 
  -6 -20   0   -1.23    0.91 
   6 -20   0    1.95    1.18 
  -7 -20   0   41.45    3.32 
   7 -20   0   39.64    3.07 
  -7  20   0   44.56    3.40 
  -8 -20   0    7.56    2.00 
   8 -20   0    4.92    1.69 
  -8  20   0    7.16    2.06 
   9 -20   0   44.69    3.35 
  -9 -20   0   48.27    3.89 
  -9  20   0   54.82    4.18 
 -10 -20   0   11.29    2.61 
 -10  20   0   13.72    2.68 
 -11 -20   0   39.90    4.34 
 -11  20   0   42.74    4.19 
   0 -21   0   -0.23    0.81 
   1 -21   0   11.49    1.85 
  -1 -21   0   11.36    1.75 
  -1  21   0    9.84    1.47 
  -2 -21   0   60.84    3.40 
   2 -21   0   63.57    3.53 
  -2 -21   0   59.98    3.21 
  -3 -21   0   29.04    2.45 
   3 -21   0   31.48    2.77 
  -3 -21   0   32.07    2.62 
  -3  21   0   34.44    2.65 
  -4 -21   0   75.27    3.97 
  -4 -21   0   80.98    3.86 
   4 -21   0   76.37    4.04 
  -4  21   0   82.17    4.17 
  -5 -21   0   57.54    3.56 
   5 -21   0   60.21    3.72 
  -5  21   0   58.08    3.68 
  -6 -21   0   54.19    3.72 
   6 -21   0   57.26    3.55 
  -6  21   0   48.15    3.44 
   7 -21   0   18.97    2.45 
  -7 -21   0   16.53    2.55 
  -7  21   0   18.35    2.63 
   8 -21   0    7.37    1.88 
  -8 -21   0   10.96    2.32 
  -8  21   0    8.09    2.18 
   9 -21   0    1.14    1.47 
  -9 -21   0    3.65    1.77 
  -9  21   0    1.15    1.58 
 -10 -21   0    0.39    1.55 
 -10  21   0    2.92    1.80 
 -11 -21   0    0.98    1.80 
   0 -22   0  146.42    5.67 
  -1 -22   0   10.45    1.75 
   1 -22   0   11.17    1.85 
  -2 -22   0   50.86    3.23 
   2 -22   0   47.10    3.25 
  -3 -22   0    1.65    1.16 
   3 -22   0    4.17    1.42 
  -3 -22   0    2.71    1.28 
  -3  22   0    4.08    1.33 
  -4 -22   0    5.52    1.61 
   4 -22   0    7.44    1.75 
  -4 -22   0    8.70    1.73 
  -4  22   0   10.10    1.90 
   5 -22   0   -0.25    1.12 
  -5 -22   0    1.43    1.30 
  -5  22   0    3.32    1.46 
  -6 -22   0    6.13    1.79 
   6 -22   0    3.69    1.57 
  -6  22   0    6.19    1.84 
   7 -22   0    0.17    1.13 
  -7 -22   0   -1.29    1.19 
  -7  22   0   -0.02    1.24 
   8 -22   0   25.27    2.87 
  -8 -22   0   27.41    3.29 
  -8  22   0   26.32    3.16 
  -9 -22   0   -0.06    1.47 
   9 -22   0   -0.79    1.19 
  -9  22   0    0.07    1.56 
 -10 -22   0   39.22    4.13 
 -10  22   0   38.58    4.04 
   0 -23   0    2.67    1.17 
   1 -23   0    1.01    1.13 
  -1 -23   0    5.44    1.46 
  -2 -23   0   21.98    2.39 
   2 -23   0   23.31    2.58 
   3 -23   0   20.30    2.53 
  -3 -23   0   23.07    2.46 
  -3  23   0   20.30    2.32 
  -4 -23   0   48.92    3.37 
   4 -23   0   53.40    3.61 
  -4 -23   0   50.89    3.29 
  -4  23   0   53.29    3.41 
  -5 -23   0   33.64    3.08 
   5 -23   0   29.85    3.02 
  -5 -23   0   24.90    2.52 
  -5  23   0   30.56    2.94 
   6 -23   0   28.63    2.95 
  -6 -23   0   32.39    3.22 
  -6  23   0   35.24    3.25 
  -7 -23   0   25.93    3.10 
   7 -23   0   26.26    2.97 
  -7  23   0   24.16    3.03 
  -8 -23   0    5.23    1.91 
   8 -23   0    8.17    2.01 
  -8  23   0   11.51    2.48 
   9 -23   0    3.58    1.70 
  -9 -23   0    1.49    1.71 
  -9  23   0    1.38    1.77 
 -10 -23   0    3.26    2.06 
   0 -24   0   47.11    3.31 
   1 -24   0   68.86    4.04 
  -1 -24   0   67.62    3.93 
  -2 -24   0    5.65    1.64 
   2 -24   0    9.70    1.95 
  -3 -24   0   30.43    2.77 
   3 -24   0   31.17    2.98 
   4 -24   0    4.17    1.60 
  -4 -24   0    3.16    1.42 
  -4 -24   0    3.31    1.44 
  -4  24   0    2.27    1.43 
  -5 -24   0    3.63    1.39 
   5 -24   0    2.56    1.46 
  -5 -24   0    1.71    1.41 
  -5  24   0    1.48    1.58 
  -6 -24   0    3.92    1.66 
   6 -24   0    7.76    2.00 
  -6  24   0    7.58    1.97 
   7 -24   0    7.20    1.99 
  -7 -24   0    7.12    2.12 
  -7  24   0    9.32    2.31 
   8 -24   0    2.09    1.56 
  -8 -24   0    4.46    1.95 
  -8  24   0    2.26    1.84 
   9 -24   0   65.57    4.37 
  -9 -24   0   61.91    4.69 
  -9  24   0   65.15    4.91 
   0 -25   0   -0.31    1.17 
  -1 -25   0    5.27    1.68 
   1 -25   0    2.07    1.39 
   2 -25   0    0.59    1.20 
  -2 -25   0    0.52    1.24 
   3 -25   0   24.89    2.87 
  -3 -25   0   34.35    3.03 
  -4 -25   0    0.45    1.21 
   4 -25   0   -0.12    1.30 
  -4  25   0    1.42    1.28 
   5 -25   0   86.57    4.81 
  -5 -25   0   78.98    4.65 
  -5  25   0   85.04    4.72 
  -6 -25   0    3.50    1.74 
   6 -25   0    2.07    1.49 
  -6  25   0    5.73    1.99 
  -7 -25   0   43.77    3.88 
   7 -25   0   43.31    3.75 
  -7  25   0   44.91    3.95 
   8 -25   0    2.72    1.74 
  -8 -25   0    0.58    1.65 
  -8  25   0    0.23    1.79 
  -9 -25   0    2.40    1.97 
   9 -25   0    1.25    1.64 
  -9  25   0    1.23    1.67 
   0 -26   0   54.50    3.71 
  -1 -26   0   36.49    3.18 
   1 -26   0   32.15    3.21 
  -2 -26   0   21.66    2.63 
   2 -26   0   29.92    3.13 
  -3 -26   0   12.69    2.21 
   3 -26   0   13.00    2.32 
  -4 -26   0    0.96    1.42 
   4 -26   0    3.37    1.71 
   5 -26   0    0.14    1.43 
  -5  26   0   -1.11    1.34 
   6 -26   0    4.07    1.89 
  -6 -26   0    4.96    1.93 
  -6  26   0    5.08    1.81 
  -7 -26   0    4.94    2.04 
   7 -26   0    1.21    1.68 
  -7  26   0    4.41    2.02 
   8 -26   0   11.37    2.56 
  -8 -26   0   11.73    2.74 
  -8  26   0   10.12    2.65 
   0 -27   0    0.08    1.16 
   1 -27   0    1.91    1.38 
  -1 -27   0   -1.00    1.29 
  -2 -27   0   17.05    2.57 
   2 -27   0   16.70    2.63 
   3 -27   0    0.82    1.48 
  -3 -27   0    0.06    1.49 
   4 -27   0   18.87    2.92 
  -4 -27   0   25.36    2.86 
   5 -27   0    7.88    2.12 
   6 -27   0   48.12    4.09 
  -6  27   0   46.48    3.79 
   7 -27   0    4.31    1.86 
  -7 -27   0    1.19    1.69 
  -7  27   0    4.16    2.01 
   0 -28   0   48.91    3.73 
  -1 -28   0   17.47    2.68 
   1 -28   0   18.80    2.77 
  -2 -28   0   57.17    4.00 
   2 -28   0   53.63    4.08 
   3 -28   0    0.09    1.41 
  -3 -28   0    0.93    1.41 
  -4 -28   0    4.73    1.89 
   4 -28   0    9.14    2.25 
   5 -28   0    1.41    1.59 
   6 -28   0    5.06    2.03 
   0 -29   0    0.70    1.62 
   1 -29   0    6.77    1.96 
  -1 -29   0    6.58    1.94 
   2 -29   0    3.71    1.81 
  -2 -29   0    6.21    2.03 
  -3 -29   0   20.63    2.92 
   3 -29   0   27.07    3.39 
  -4 -29   0   14.51    2.55 
   4 -29   0   13.26    2.63 
   5 -29   0   28.61    3.49 
   0 -30   0    0.33    1.61 
  -1 -30   0   64.70    4.43 
   1 -30   0   61.15    4.38 
  -2 -30   0   -0.36    1.70 
   2 -30   0    2.31    1.99 
  -3 -30   0   15.73    2.72 
   3 -30   0   18.83    3.02 
   4 -30   0    0.32    1.82 
   0 -31   0    1.54    1.64 
  -1 -31   0    1.13    1.70 
   1 -31   0    3.66    1.99 
 -14   0   1   -0.30    1.37 
 -13   0   1   17.92    2.44 
 -12   0   1    0.70    1.08 
 -11   0   1   68.38    3.70 
 -10   0   1   -0.31    0.76 
 -10   0   1   -0.48    0.82 
  -9   0   1  104.76    4.24 
  -9   0   1  109.22    4.35 
  -8   0   1    1.49    0.76 
  -8   0   1    0.65    0.74 
  -7   0   1   84.27    3.28 
  -7   0   1   79.60    3.27 
  -6   0   1    0.20    0.47 
  -6   0   1   -0.50    0.44 
  -5   0   1  111.84    3.50 
  -4   0   1   -0.25    0.32 
  -3   0   1    2.23    0.48 
  -2   0   1    0.01    0.18 
  -1   0  -1 1000.00   21.61 
  -2   0  -1   -0.57    0.21 
  -3   0  -1  187.54    4.57 
  -4   0  -1    0.46    0.39 
  -4   0  -1    0.36    0.36 
  -5   0  -1  146.04    4.31 
  -5   0  -1  136.79    4.05 
  -6   0  -1   -0.57    0.42 
  -6   0  -1    0.56    0.63 
  -7   0  -1   42.76    2.20 
  -7   0  -1   42.56    2.35 
  -8   0  -1    1.08    0.80 
  -8   0  -1    0.56    0.68 
  -9   0  -1  172.67    5.87 
  -9   0  -1  155.07    5.41 
 -10   0  -1    0.00    0.90 
 -10   0  -1    0.38    0.80 
 -11   0  -1   55.95    3.29 
 -11   0  -1   59.40    3.59 
 -12   0  -1   -0.88    1.12 
 -12   0  -1    0.18    1.06 
 -13   0  -1   37.48    3.07 
 -15   1   1   33.13    3.39 
 -14  -1   1   15.78    2.41 
 -14   1   1   16.02    2.49 
 -13  -1   1   45.11    3.31 
 -13  -1   1   44.59    3.53 
 -13   1   1   41.77    3.33 
 -12  -1   1   10.20    2.05 
 -12  -1   1   13.68    2.05 
 -12   1   1    6.93    1.74 
 -11  -1   1   18.24    2.08 
 -11  -1   1   13.02    2.02 
 -11   1   1   15.46    2.07 
 -10  -1   1    8.58    1.61 
 -10  -1   1    8.84    1.55 
 -10   1   1   11.03    1.70 
  -9  -1   1    1.52    0.86 
  -9  -1   1    0.29    0.83 
  -9   1   1    0.65    0.80 
  -8  -1   1    4.12    1.10 
  -8  -1   1    3.33    0.94 
  -8   1   1    3.16    0.93 
  -7  -1   1   41.72    2.22 
  -7  -1   1   44.31    2.40 
  -7   1   1   42.40    2.30 
  -6  -1   1    1.93    0.63 
  -6  -1   1    2.82    0.82 
  -6   1   1    3.47    0.81 
  -5  -1   1  123.27    3.75 
  -5  -1   1  122.00    3.87 
  -5   1   1  126.89    3.86 
  -4  -1   1   13.27    0.95 
  -4  -1   1   13.86    1.05 
  -4   1   1   15.01    1.03 
  -3  -1   1  308.77    7.12 
  -3  -1   1  306.05    7.02 
  -3   1   1  298.84    7.07 
  -2  -1   1    6.07    0.49 
  -2   1   1    3.91    0.44 
  -1  -1   1  195.64    4.39 
  -1   1   1  198.75    4.42 
  -1  -1  -1    7.35    0.33 
  -1   1  -1    7.23    0.45 
  -2  -1  -1   30.51    1.21 
  -2  -1  -1   28.40    0.98 
  -2   1  -1   29.50    1.14 
  -3  -1  -1  120.62    3.17 
  -3  -1  -1  123.52    3.48 
  -3   1  -1  124.85    3.35 
  -4  -1  -1   10.17    0.84 
  -4  -1  -1   11.81    1.06 
  -4   1  -1   12.01    0.92 
  -5  -1  -1  278.56    6.89 
  -5  -1  -1  282.05    7.28 
  -5   1  -1  282.50    7.08 
  -6  -1  -1   16.87    1.55 
  -6  -1  -1   20.42    1.38 
  -6   1  -1   20.17    1.46 
  -7  -1  -1  101.38    3.90 
  -7  -1  -1   95.38    3.49 
  -7   1  -1   98.10    3.63 
  -8  -1  -1   41.43    2.31 
  -8  -1  -1   43.05    2.60 
  -8   1  -1   46.34    2.48 
  -9  -1  -1   16.51    1.65 
  -9  -1  -1   17.01    1.97 
  -9   1  -1   16.84    1.74 
 -10  -1  -1    5.16    1.26 
 -10  -1  -1    4.51    1.46 
 -10   1  -1    5.97    1.38 
 -11  -1  -1    0.63    1.21 
 -11  -1  -1    3.35    1.23 
 -11   1  -1    2.45    1.20 
 -12  -1  -1    0.31    1.01 
 -12  -1  -1   -0.04    1.19 
 -12   1  -1    0.44    1.09 
 -13  -1  -1   21.49    2.83 
 -13  -1  -1   21.36    2.49 
 -13   1  -1   19.80    2.52 
 -14   1  -1   13.56    2.38 
 -15   2   1   -0.37    1.45 
 -14   2   1   -0.11    1.32 
 -13  -2   1    7.48    1.79 
 -13  -2   1    6.18    1.84 
 -13   2   1    5.74    1.78 
 -12  -2   1   35.23    3.10 
 -12  -2   1   35.81    2.79 
 -12   2   1   29.70    2.81 
 -11  -2   1   10.70    1.74 
 -11  -2   1    7.23    1.74 
 -11   2   1   10.77    1.85 
 -11   2   1    9.35    1.64 
 -10  -2   1   80.27    4.05 
 -10  -2   1   80.91    3.74 
 -10   2   1   81.26    3.93 
  -9  -2   1    7.72    1.31 
  -9  -2   1    9.41    1.56 
  -9   2   1   10.67    1.58 
  -9   2   1   10.75    1.48 
  -8  -2   1  114.61    4.15 
  -8  -2   1  112.29    4.43 
  -8   2   1  114.01    4.12 
  -8   2   1  127.22    4.52 
  -7  -2   1   10.36    1.38 
  -7  -2   1   10.36    1.24 
  -7   2   1   12.02    1.41 
  -7   2   1   11.70    1.25 
  -6  -2   1   38.06    1.91 
  -6  -2   1   39.15    2.13 
  -6   2   1   39.98    2.09 
  -6   2   1   41.12    1.96 
  -5  -2   1    9.76    1.13 
  -5  -2   1    9.56    0.94 
  -5   2   1   10.71    1.06 
  -5   2   1   11.80    0.98 
  -4  -2   1    2.05    0.61 
  -4  -2   1    1.58    0.48 
  -4   2   1    1.73    0.46 
  -4   2   1    1.54    0.49 
  -3  -2   1    5.19    0.58 
  -3  -2   1    6.71    0.75 
  -3   2   1    4.28    0.59 
  -2  -2   1   99.55    2.58 
  -1  -2   1  130.86    3.02 
  -1   2   1  126.91    3.05 
  -1   2  -1  146.19    3.50 
  -2  -2  -1   82.44    2.44 
  -2  -2  -1   81.11    2.02 
  -3  -2  -1  281.69    6.82 
  -3  -2  -1  278.23    6.34 
  -3   2  -1  279.25    6.69 
  -3   2  -1  290.02    6.50 
  -4  -2  -1  185.95    5.03 
  -4  -2  -1  176.26    4.50 
  -4   2  -1  181.35    4.68 
  -4   2  -1  177.46    4.82 
  -5  -2  -1   18.29    1.17 
  -5  -2  -1   17.48    1.44 
  -5   2  -1   19.07    1.29 
  -5   2  -1   19.48    1.37 
  -6  -2  -1    1.06    0.56 
  -6  -2  -1    0.73    0.68 
  -6   2  -1   -0.01    0.48 
  -7  -2  -1   20.84    1.50 
  -7  -2  -1   19.20    1.78 
  -7   2  -1   20.81    1.67 
  -8  -2  -1   57.61    3.10 
  -8  -2  -1   58.36    2.69 
  -8   2  -1   56.23    2.81 
  -9  -2  -1    8.85    1.64 
  -9  -2  -1    9.34    1.37 
  -9   2  -1    6.78    1.28 
 -10  -2  -1   88.32    4.36 
 -10  -2  -1   86.42    3.78 
 -10   2  -1   81.38    3.94 
 -11  -2  -1    6.63    1.44 
 -11  -2  -1    7.27    1.85 
 -11   2  -1    9.05    1.66 
 -12  -2  -1   59.90    3.49 
 -12  -2  -1   60.44    3.99 
 -12   2  -1   64.47    3.78 
 -13  -2  -1    6.65    1.97 
 -13   2  -1    4.95    1.73 
 -14   2  -1   15.39    2.52 
 -15   3   1    2.74    1.68 
 -14  -3   1   46.65    4.06 
 -14   3   1   35.24    3.44 
 -13  -3   1    5.39    1.61 
 -13  -3   1    7.78    2.11 
 -13   3   1    4.53    1.68 
 -12  -3   1   37.03    2.79 
 -12  -3   1   43.41    3.43 
 -12   3   1   42.99    3.18 
 -11  -3   1   -0.22    1.10 
 -11  -3   1    0.21    0.96 
 -11   3   1    0.95    1.11 
 -10  -3   1   15.19    2.07 
 -10  -3   1   17.40    1.84 
 -10   3   1   18.89    2.10 
 -10   3   1   15.51    1.76 
  -9  -3   1   -0.80    0.75 
  -9  -3   1    0.29    0.74 
  -9   3   1    0.25    0.83 
  -9   3   1    0.29    0.71 
  -8  -3   1   22.20    2.08 
  -8  -3   1   22.18    1.74 
  -8   3   1   20.56    1.63 
  -8   3   1   26.83    1.99 
  -7  -3   1    7.93    1.29 
  -7  -3   1    8.72    1.12 
  -7   3   1    7.87    1.22 
  -7   3   1    7.39    1.03 
  -6  -3   1  157.74    4.61 
  -6  -3   1  156.10    5.00 
  -6   3   1  155.56    4.85 
  -6   3   1  158.14    4.47 
  -5  -3   1   21.20    1.55 
  -5  -3   1   18.31    1.23 
  -5   3   1   19.76    1.20 
  -5   3   1   20.02    1.39 
  -4  -3   1  133.52    3.64 
  -4  -3   1  128.35    3.95 
   4  -3  -1  130.26    3.35 
  -4   3   1  129.41    3.43 
   3  -3  -1    1.36    0.36 
  -3  -3   1    1.10    0.45 
  -3  -3   1    1.75    0.41 
  -3   3   1    0.96    0.41 
  -2  -3   1  191.26    4.41 
  -2   3   1  183.18    4.57 
   0   3   1   77.74    1.88 
  -1   3  -1   -0.28    0.20 
  -2  -3  -1    6.77    0.70 
  -2  -3  -1    6.39    0.42 
   2  -3   1    6.19    0.57 
  -2   3  -1    6.82    0.65 
  -3  -3  -1   88.44    2.93 
  -3  -3  -1   97.11    2.48 
  -3   3  -1   94.53    2.89 
  -4  -3  -1  206.70    5.09 
  -4  -3  -1  210.62    5.71 
  -4   3  -1  215.81    5.24 
  -4   3  -1  212.18    5.59 
  -5  -3  -1   40.32    2.11 
  -5  -3  -1   39.23    1.68 
  -5   3  -1   38.56    1.78 
  -5   3  -1   40.48    1.99 
  -6  -3  -1  112.05    4.10 
  -6  -3  -1  107.10    3.45 
  -6   3  -1  114.92    3.67 
  -6   3  -1  112.50    3.87 
  -7  -3  -1   22.57    1.96 
  -7  -3  -1   24.34    1.59 
  -7   3  -1   26.71    1.88 
  -7   3  -1   26.70    1.75 
  -8  -3  -1   98.17    3.65 
  -8  -3  -1  101.57    4.25 
  -8   3  -1  104.07    3.86 
  -8   3  -1  101.19    4.01 
  -9  -3  -1    7.26    1.54 
  -9  -3  -1    5.93    1.17 
  -9   3  -1    6.23    1.27 
  -9   3  -1    6.06    1.25 
 -10  -3  -1   11.55    1.56 
 -10  -3  -1    8.23    1.80 
 -10   3  -1   13.71    1.82 
 -10   3  -1    8.81    1.57 
 -11  -3  -1   -0.49    0.89 
 -11  -3  -1   -2.49    1.00 
 -11   3  -1    0.52    1.04 
 -12  -3  -1    9.96    1.76 
 -12  -3  -1    5.83    1.91 
 -12   3  -1    5.85    1.61 
 -13  -3  -1    0.29    1.54 
 -13   3  -1    0.92    1.31 
 -14  -3  -1   42.72    4.01 
 -14   3  -1   43.90    3.60 
 -15   3  -1    4.71    1.86 
 -15   4   1    3.42    1.83 
 -14  -4   1   -0.95    1.41 
 -14   4   1   -0.45    1.20 
 -13  -4   1    4.28    1.92 
 -13   4   1    5.61    1.83 
 -12  -4   1   22.83    2.31 
 -12  -4   1   16.80    2.52 
 -12   4   1   21.28    2.57 
 -11  -4   1   22.92    2.16 
 -11  -4   1   19.54    2.48 
 -11   4   1   24.30    2.48 
 -10  -4   1   35.94    2.42 
 -10  -4   1   41.87    3.05 
 -10   4   1   32.83    2.64 
  -9  -4   1  103.20    4.03 
  -9  -4   1  109.58    4.70 
  -9   4   1  107.14    3.95 
  -9   4   1  105.10    4.45 
  -8  -4   1   65.11    2.91 
  -8  -4   1   67.95    3.46 
  -8   4   1   69.48    3.31 
  -8   4   1   69.47    2.87 
  -7  -4   1   45.24    2.18 
  -7  -4   1   37.63    2.38 
  -7   4   1   40.04    2.35 
  -7   4   1   42.65    2.04 
  -6  -4   1   62.71    2.86 
  -6  -4   1   62.16    2.44 
  -6   4   1   57.54    2.24 
  -6   4   1   58.26    2.67 
  -5  -4   1    0.58    0.52 
  -5  -4   1    0.60    0.43 
   5  -4  -1    0.57    0.44 
  -5   4   1    0.75    0.43 
  -5   4   1    2.21    0.66 
   4  -4  -1    4.01    0.58 
  -4  -4   1    4.75    0.81 
  -4  -4   1    4.73    0.63 
  -4   4   1    3.41    0.68 
  -4   4   1    4.47    0.50 
  -3  -4   1   59.53    1.94 
   3  -4  -1   62.76    1.94 
  -3  -4   1   58.48    2.25 
  -3   4   1   59.73    2.19 
   2  -4  -1    2.09    0.41 
  -2  -4   1    1.63    0.47 
  -2  -4   1    1.27    0.32 
  -2   4   1    1.15    0.38 
   1  -4  -1  115.36    2.87 
  -1  -4   1  112.82    2.98 
   0  -4  -1  222.28    4.95 
   0   4   1  219.52    4.89 
   1  -4   1  196.57    4.58 
  -1  -4  -1  199.00    4.75 
  -1   4  -1  197.08    4.78 
   1   4   1  202.99    4.40 
   2  -4   1  443.22    9.85 
  -2  -4  -1  466.57   10.36 
  -2  -4  -1  477.43    9.80 
  -2   4  -1  459.93   10.35 
   3  -4   1    1.90    0.44 
  -3  -4  -1    1.60    0.50 
  -3  -4  -1    1.69    0.32 
  -3   4  -1    1.10    0.44 
  -4  -4  -1   35.85    1.39 
  -4   4  -1   35.14    1.77 
  -4   4  -1   36.43    1.46 
  -5  -4  -1   12.61    1.35 
  -5  -4  -1   15.68    1.02 
  -5   4  -1   15.25    1.09 
  -5   4  -1   17.82    1.35 
  -6  -4  -1    0.69    0.49 
  -6  -4  -1    0.50    0.66 
  -6   4  -1    0.36    0.50 
  -6   4  -1    0.48    0.56 
  -7  -4  -1    0.82    0.60 
  -7  -4  -1    0.76    0.76 
  -7   4  -1    1.03    0.73 
  -7   4  -1    1.50    0.65 
  -8  -4  -1   31.85    1.91 
  -8  -4  -1   32.68    2.48 
  -8   4  -1   29.79    2.19 
  -8   4  -1   28.30    1.92 
  -9  -4  -1   61.94    3.52 
  -9  -4  -1   62.97    2.90 
  -9   4  -1   56.50    3.17 
  -9   4  -1   59.94    2.99 
 -10  -4  -1   62.13    3.72 
 -10  -4  -1   58.67    3.02 
 -10   4  -1   61.98    3.45 
 -11  -4  -1   63.94    3.37 
 -11  -4  -1   76.83    4.34 
 -11   4  -1   81.29    4.14 
 -12  -4  -1   29.24    3.16 
 -12   4  -1   33.92    2.98 
 -13  -4  -1   27.13    3.30 
 -13   4  -1   30.50    3.07 
 -14  -4  -1   10.46    2.50 
 -14   4  -1   13.90    2.48 
 -15   4  -1   -0.01    1.54 
 -15  -5   1   29.23    3.78 
 -15   5   1   32.20    3.60 
 -14  -5   1   -0.50    1.79 
 -14   5   1    3.74    1.86 
 -13  -5   1   52.41    4.23 
 -13   5   1   60.19    4.10 
 -12  -5   1    1.67    1.49 
 -12   5   1    1.73    1.25 
 -11  -5   1   27.76    2.26 
 -11  -5   1   31.42    2.99 
 -11   5   1   33.61    2.89 
 -10  -5   1    0.43    0.80 
 -10  -5   1   -0.20    1.02 
 -10   5   1    1.00    1.05 
  -9  -5   1    4.00    1.02 
  -9  -5   1    1.64    1.14 
  -9   5   1    3.27    1.12 
  -8  -5   1    5.00    1.27 
  -8  -5   1    5.11    1.01 
  -8   5   1    5.18    1.16 
  -8   5   1    4.95    0.94 
  -7  -5   1   86.81    3.76 
  -7  -5   1   92.27    3.28 
  -7   5   1   84.56    2.98 
  -7   5   1   92.83    3.72 
  -6  -5   1   35.44    1.79 
  -6  -5   1   31.12    2.15 
  -6   5   1   36.91    2.15 
  -6   5   1   37.11    1.66 
  -5  -5   1  328.47    7.96 
   5  -5  -1  341.36    7.75 
  -5  -5   1  332.73    8.63 
  -5   5   1  327.81    8.48 
  -5   5   1  333.27    7.59 
  -4  -5   1   21.53    1.19 
   4  -5  -1   19.36    1.15 
  -4  -5   1   22.92    1.50 
  -4   5   1   20.82    1.38 
  -3  -5   1  284.89    7.11 
   3  -5  -1  283.31    6.57 
  -3  -5   1  299.03    6.64 
  -3   5   1  276.47    6.98 
  -2  -5   1    0.30    0.35 
   2  -5  -1    0.85    0.34 
  -2   5   1    0.32    0.36 
   2   5  -1    1.15    0.31 
  -1  -5   1  221.65    5.24 
   1  -5  -1  217.31    5.09 
   0  -5  -1    2.62    0.44 
   0  -5   1    3.04    0.45 
   0   5   1    3.13    0.37 
  -1  -5  -1    2.67    0.47 
  -1  -5  -1    2.23    0.43 
   1  -5   1    2.96    0.49 
   1   5   1    2.30    0.26 
  -1   5  -1    1.73    0.45 
   2  -5   1    3.61    0.55 
  -2  -5  -1    3.07    0.58 
   2   5   1    3.21    0.29 
  -2   5  -1    2.51    0.56 
  -3  -5  -1   14.11    0.69 
   3  -5   1   11.46    0.91 
  -3  -5  -1   13.23    1.09 
  -3   5  -1   14.32    1.06 
  -4  -5  -1    8.20    0.67 
  -4  -5  -1    8.24    1.08 
  -4   5  -1    8.79    1.02 
  -4   5  -1    9.19    0.71 
  -5  -5  -1  358.33    9.48 
  -5  -5  -1  375.36    8.59 
  -5   5  -1  378.06    8.61 
  -5   5  -1  382.20    9.40 
  -6  -5  -1    7.10    1.28 
  -6  -5  -1    6.43    0.83 
  -6   5  -1    8.38    0.96 
  -6   5  -1    6.48    1.09 
  -7  -5  -1  163.38    4.68 
  -7  -5  -1  155.92    5.52 
  -7   5  -1  164.23    5.36 
  -7   5  -1  156.63    4.70 
  -8  -5  -1    5.80    1.40 
  -8  -5  -1    4.93    0.99 
  -8   5  -1    4.75    0.99 
  -8   5  -1    4.10    1.11 
  -9  -5  -1   63.96    2.89 
  -9  -5  -1   60.86    3.60 
  -9   5  -1   63.34    3.38 
 -10  -5  -1   -0.36    0.72 
 -10  -5  -1   -1.49    0.89 
 -10   5  -1   -0.44    0.85 
 -11  -5  -1    4.64    1.50 
 -11   5  -1    0.61    1.12 
 -12  -5  -1    2.63    1.59 
 -12   5  -1    1.10    1.30 
 -13  -5  -1   35.12    3.67 
 -13   5  -1   36.49    3.33 
 -14  -5  -1    5.41    2.14 
 -14   5  -1    6.30    1.96 
 -15  -5  -1   47.59    4.47 
 -15   5  -1   52.55    4.21 
 -15  -6   1    6.15    2.41 
 -15   6   1    9.76    2.33 
 -14  -6   1   -2.19    1.56 
 -14   6   1    1.66    1.47 
 -13  -6   1    1.09    1.60 
 -13   6   1    2.08    1.51 
 -12  -6   1    2.32    1.57 
 -12   6   1    0.10    1.21 
 -11  -6   1   64.86    4.01 
 -11  -6   1   63.24    3.27 
 -11   6   1   61.13    3.81 
 -10  -6   1    4.80    1.17 
 -10  -6   1    6.81    1.58 
 -10   6   1    5.37    1.46 
  -9  -6   1  208.86    6.21 
  -9  -6   1  201.22    7.06 
  -9   6   1  202.04    6.84 
  -8  -6   1    3.24    1.15 
  -8  -6   1    5.61    1.02 
  -8   6   1    4.39    1.13 
  -7  -6   1   90.29    3.25 
  -7  -6   1   92.33    3.93 
  -7   6   1   89.82    3.78 
  -7   6   1   87.36    2.94 
   6  -6  -1    0.56    0.48 
  -6  -6   1   -0.29    0.47 
  -6  -6   1   -0.59    0.55 
  -6   6   1    0.38    0.42 
  -6   6   1    0.37    0.63 
  -5  -6   1    5.56    0.77 
   5  -6  -1    4.43    0.74 
  -5  -6   1    3.52    0.91 
  -5   6   1    3.77    0.86 
  -5   6   1    4.79    0.57 
  -4  -6   1    1.63    0.47 
  -4  -6   1    1.93    0.64 
   4  -6  -1    2.39    0.54 
  -4   6   1    1.75    0.60 
  -3  -6   1   82.28    2.93 
   3  -6  -1   85.33    2.64 
  -3  -6   1   87.80    2.33 
  -3   6   1   81.34    2.84 
   3   6  -1   85.87    2.45 
   2  -6  -1   99.59    2.91 
  -2  -6   1  100.98    2.65 
  -2  -6   1   95.05    3.04 
   2   6  -1  103.87    2.69 
  -2   6   1  100.63    3.03 
  -1  -6   1  355.34    8.01 
   1  -6  -1  346.69    7.82 
   0  -6   1    3.82    0.53 
   0  -6  -1    3.06    0.51 
   0   6   1    4.19    0.46 
  -1  -6  -1  170.14    4.40 
  -1  -6  -1  175.34    4.27 
   1  -6   1  176.07    4.36 
  -1   6  -1  172.83    4.48 
   1   6   1  176.65    3.97 
  -2  -6  -1    3.87    0.66 
   2  -6   1    3.47    0.57 
  -2   6  -1    2.62    0.60 
   2   6   1    2.88    0.29 
  -3  -6  -1   90.15    2.35 
  -3  -6  -1   94.67    3.19 
   3  -6   1   90.71    2.84 
  -3   6  -1   93.24    3.09 
   4  -6   1   10.07    0.96 
  -4  -6  -1   10.34    0.73 
  -4  -6  -1    9.78    1.16 
  -4   6  -1   10.27    1.11 
  -5  -6  -1   13.58    1.49 
  -5  -6  -1   16.47    1.02 
  -5   6  -1   16.66    1.46 
  -5   6  -1   16.31    1.15 
  -6  -6  -1    4.47    0.74 
  -6  -6  -1    5.42    1.14 
  -6   6  -1    4.40    0.98 
  -7  -6  -1    9.26    1.49 
  -7  -6  -1    9.81    1.03 
  -7   6  -1   11.51    1.49 
  -7   6  -1   11.10    1.12 
  -8  -6  -1   10.99    1.20 
  -8  -6  -1    8.74    1.60 
  -8   6  -1   11.64    1.25 
  -8   6  -1   11.38    1.62 
  -9  -6  -1   98.39    4.75 
  -9  -6  -1  101.00    3.74 
  -9   6  -1  109.02    4.56 
 -10  -6  -1    5.10    1.55 
 -10  -6  -1    2.39    0.94 
 -10   6  -1    2.10    1.16 
 -11  -6  -1  112.59    5.47 
 -11   6  -1  105.96    4.94 
 -12  -6  -1    5.83    1.83 
 -12   6  -1    5.60    1.73 
 -13  -6  -1   56.96    4.40 
 -13   6  -1   58.63    4.06 
 -14  -6  -1   -0.75    1.63 
 -14   6  -1    1.06    1.45 
 -15   6  -1    0.67    1.65 
 -14  -7   1   26.06    3.67 
 -14   7   1   29.64    3.44 
 -13  -7   1   38.70    3.87 
 -13   7   1   42.90    3.53 
 -12  -7   1   19.46    2.86 
 -12   7   1   18.35    2.57 
 -11  -7   1   17.45    2.46 
 -11   7   1   15.71    2.28 
 -10  -7   1   -0.43    0.77 
 -10  -7   1   -1.37    0.81 
 -10   7   1    0.07    0.85 
  -9  -7   1    0.65    0.94 
  -9  -7   1    0.06    0.71 
  -9   7   1    0.33    0.85 
  -8  -7   1   26.84    2.47 
  -8  -7   1   29.15    1.86 
  -8   7   1   27.84    2.22 
  -7  -7   1   46.82    2.18 
  -7  -7   1   43.58    2.74 
  -7   7   1   41.19    2.57 
   6  -7  -1   60.62    2.42 
  -6  -7   1   57.32    2.33 
  -6   7   1   55.88    1.94 
  -6   7   1   52.68    2.72 
  -5  -7   1  125.00    4.37 
  -5  -7   1  126.90    3.67 
   5  -7  -1  119.80    3.69 
  -5   7   1  126.84    4.29 
  -4  -7   1  199.07    4.70 
  -4  -7   1  192.99    5.68 
   4  -7  -1  192.70    5.15 
  -4  -7   1  201.07    5.03 
  -4   7   1  202.29    5.63 
  -3  -7   1  100.23    2.73 
   3  -7  -1  100.58    3.05 
  -3  -7   1  102.10    3.38 
   3   7  -1   96.13    2.74 
  -3   7   1   95.95    3.24 
   2  -7  -1  102.95    3.04 
  -2  -7   1   96.20    3.12 
  -2   7   1   99.02    3.08 
   2   7  -1  100.78    2.73 
  -1  -7   1    1.96    0.46 
   1  -7  -1    2.05    0.49 
   1   7  -1    2.42    0.44 
   0  -7   1  165.35    4.06 
   0  -7  -1  159.65    4.19 
   0  -7   1  168.32    4.22 
   0  -7  -1  166.53    4.04 
   0   7   1  162.82    4.04 
  -1  -7  -1    5.50    0.67 
   1  -7   1    5.60    0.68 
  -1  -7  -1    7.47    0.72 
  -1   7  -1    5.35    0.69 
   1   7   1    5.41    0.46 
  -2  -7  -1   89.50    2.59 
  -2  -7  -1   82.51    2.82 
   2  -7   1   82.03    2.67 
  -2   7  -1   78.96    2.79 
   2   7   1   85.06    2.12 
  -3  -7  -1    5.41    0.87 
   3  -7   1    4.25    0.70 
  -3   7  -1    5.98    0.86 
  -4  -7  -1   85.75    2.37 
   4  -7   1   82.57    2.84 
  -4   7  -1   79.08    3.10 
   5  -7   1  116.32    3.67 
  -5  -7  -1  119.20    4.25 
  -5  -7  -1  117.80    3.25 
  -5   7  -1  114.64    3.12 
  -5   7  -1  111.75    4.03 
  -6  -7  -1   99.74    3.08 
  -6  -7  -1   98.80    4.04 
  -6   7  -1  100.76    3.91 
  -6   7  -1   97.85    2.99 
  -7  -7  -1   60.33    2.42 
  -7  -7  -1   67.80    3.44 
  -7   7  -1   64.55    3.18 
  -7   7  -1   64.87    2.42 
  -8  -7  -1   53.35    2.38 
  -8  -7  -1   49.58    3.17 
  -8   7  -1   51.70    2.97 
  -9  -7  -1   37.46    2.12 
  -9  -7  -1   39.58    3.05 
  -9   7  -1   41.78    2.87 
 -10  -7  -1    9.68    1.96 
 -10   7  -1    8.69    1.76 
 -11  -7  -1    1.17    1.24 
 -11   7  -1    1.50    1.18 
 -12  -7  -1    3.37    1.66 
 -12   7  -1    4.15    1.62 
 -13  -7  -1   17.91    2.94 
 -13   7  -1   19.74    2.75 
 -14  -7  -1   20.76    3.36 
 -14   7  -1   18.91    2.88 
 -14  -8   1    4.28    2.25 
 -14   8   1    2.06    1.59 
 -13  -8   1    0.34    1.66 
 -13   8   1   -1.87    1.12 
 -12  -8   1   19.31    2.82 
 -12   8   1   15.78    2.47 
 -11  -8   1   -0.50    1.16 
 -11   8   1    1.04    1.14 
 -10  -8   1   62.32    3.91 
 -10   8   1   54.07    3.46 
  -9  -8   1    2.57    1.27 
  -9  -8   1    1.65    0.81 
  -9   8   1    2.45    1.12 
  -8  -8   1   92.83    4.35 
  -8  -8   1   94.33    3.55 
  -8   8   1  101.69    4.36 
   7  -8  -1    9.08    1.16 
  -7  -8   1    8.43    1.52 
  -7  -8   1    9.26    1.09 
  -7   8   1    9.12    1.44 
  -6  -8   1   37.86    1.83 
   6  -8  -1   37.10    1.94 
  -6  -8   1   34.60    2.32 
  -6   8   1   36.38    2.27 
   5  -8  -1    0.41    0.46 
  -5  -8   1   -0.19    0.52 
  -5  -8   1    0.64    0.48 
  -5  -8   1    0.44    0.38 
  -5   8   1   -0.26    0.53 
   4  -8  -1    3.24    0.72 
  -4  -8   1    3.76    0.60 
  -4  -8   1    3.93    0.92 
   4   8  -1    3.38    0.58 
  -4   8   1    3.30    0.81 
   3  -8  -1    0.66    0.46 
  -3  -8   1    1.22    0.44 
  -3  -8   1    1.50    0.60 
  -3   8   1    1.42    0.59 
   3   8  -1    1.34    0.41 
  -2  -8   1   13.58    1.07 
   2  -8  -1   14.69    1.08 
   2   8  -1   12.38    0.83 
  -2   8   1   11.74    1.02 
  -1  -8   1   48.09    1.85 
  -1  -8   1   53.05    1.95 
   1  -8  -1   51.08    1.99 
   1   8  -1   48.31    1.76 
   0  -8   1  199.58    5.11 
   0  -8   1  203.98    4.97 
   0  -8  -1  207.73    4.95 
   0  -8  -1  203.72    5.14 
   0   8   1  206.92    4.99 
  -1  -8  -1    6.00    0.72 
   1  -8   1    5.79    0.77 
  -1  -8  -1    5.65    0.72 
  -1   8  -1    7.50    0.85 
   1   8   1    6.46    0.55 
  -2  -8  -1  128.03    3.55 
  -2  -8  -1  130.65    3.88 
   2  -8   1  123.34    3.68 
   2   8   1  128.97    3.09 
  -2   8  -1  123.26    3.84 
  -3  -8  -1    0.30    0.45 
   3  -8   1   -0.08    0.38 
   3   8   1    1.06    0.29 
  -3   8  -1   -0.56    0.43 
  -4  -8  -1   82.79    3.31 
   4  -8   1   80.05    2.89 
  -4   8  -1   80.83    3.20 
   4   8   1   85.82    2.34 
  -5  -8  -1   13.62    0.93 
  -5  -8  -1   14.69    1.61 
   5  -8   1   14.09    1.25 
  -5   8  -1   11.47    1.39 
  -6  -8  -1   -0.08    0.62 
  -6  -8  -1    0.56    0.46 
  -6   8  -1    1.80    0.85 
  -6   8  -1    1.46    0.48 
  -7  -8  -1    1.34    0.88 
  -7  -8  -1    1.32    0.58 
  -7   8  -1    1.62    0.88 
  -8  -8  -1   56.07    2.45 
  -8  -8  -1   56.99    3.38 
  -8   8  -1   55.21    3.18 
  -9  -8  -1    0.54    1.11 
  -9   8  -1    0.74    0.93 
 -10  -8  -1   79.40    4.58 
 -10   8  -1   88.76    4.44 
 -11  -8  -1    7.50    1.94 
 -11   8  -1   10.11    2.03 
 -12  -8  -1   41.36    3.79 
 -12   8  -1   44.89    3.52 
 -13  -8  -1    2.80    1.73 
 -13   8  -1    2.48    1.59 
 -14  -8  -1   20.95    3.45 
 -14   8  -1   24.24    3.14 
 -14  -9   1   46.53    4.52 
 -14   9   1   36.99    3.82 
 -13  -9   1    4.51    2.11 
 -13   9   1    8.09    2.12 
 -12  -9   1   20.88    2.89 
 -12   9   1   19.85    2.73 
 -11  -9   1    2.16    1.36 
 -11   9   1    1.47    1.25 
 -10  -9   1    3.38    1.47 
 -10   9   1    3.82    1.36 
  -9  -9   1    0.40    1.08 
  -9  -9   1    1.13    0.80 
  -9   9   1    1.18    0.99 
  -8  -9   1    3.34    1.23 
  -8  -9   1    3.93    0.96 
  -8   9   1    5.01    1.35 
  -7  -9   1    1.87    0.95 
  -7  -9   1    1.87    0.70 
   7  -9  -1    1.84    0.76 
  -7   9   1    1.74    0.91 
  -6  -9   1  110.32    4.46 
  -6  -9   1  119.98    3.34 
  -6  -9   1  118.58    3.66 
   6  -9  -1  112.83    3.82 
  -6   9   1  116.36    4.42 
  -5  -9   1   37.40    1.59 
  -5  -9   1   31.15    2.17 
   5  -9  -1   30.29    1.77 
   5   9  -1   31.90    1.56 
  -5   9   1   34.17    2.15 
  -4  -9   1  234.86    6.82 
  -4  -9   1  254.62    5.89 
   4  -9  -1  235.86    6.30 
  -4   9   1  240.01    6.74 
   4   9  -1  248.58    5.96 
  -3  -9   1   26.56    1.67 
  -3  -9   1   24.98    1.30 
   3  -9  -1   22.32    1.43 
  -3   9   1   25.36    1.60 
   3   9  -1   26.04    1.23 
  -2  -9   1  314.19    7.76 
   2  -9  -1  309.16    7.54 
  -2   9   1  303.41    7.67 
   2   9  -1  318.79    7.25 
  -1  -9   1   39.03    1.74 
  -1  -9   1   38.78    1.70 
   1  -9  -1   41.42    1.83 
   1   9  -1   40.79    1.63 
   0  -9   1   83.04    2.51 
   0  -9   1   82.76    2.72 
   0  -9  -1   77.58    2.68 
   0  -9  -1   81.76    2.47 
   0   9   1   79.31    2.49 
  -1  -9  -1    0.46    0.40 
   1  -9   1   -0.26    0.36 
  -1  -9  -1    0.52    0.40 
  -1   9  -1    0.19    0.41 
   1   9   1    0.59    0.33 
  -2  -9  -1   31.60    1.71 
   2  -9   1   27.99    1.59 
  -2  -9  -1   33.35    1.58 
   2   9   1   35.38    1.22 
  -2   9  -1   33.07    1.75 
  -3  -9  -1   59.82    2.60 
   3  -9   1   56.77    2.38 
  -3   9  -1   58.63    2.56 
   3   9   1   59.76    1.77 
   4  -9   1  259.23    6.70 
  -4  -9  -1  267.35    7.30 
  -4   9  -1  246.85    7.07 
   4   9   1  260.54    5.93 
  -5  -9  -1   40.49    2.43 
  -5  -9  -1   40.57    1.58 
   5  -9   1   42.43    2.17 
  -5   9  -1   40.59    2.35 
  -6  -9  -1  195.21    6.31 
  -6  -9  -1  184.91    4.92 
  -6   9  -1  194.79    6.18 
  -7  -9  -1    0.14    0.76 
  -7  -9  -1    1.07    0.59 
  -7   9  -1    1.97    0.95 
  -8  -9  -1   61.51    3.60 
  -8   9  -1   64.53    3.44 
  -9  -9  -1   -1.71    0.83 
  -9   9  -1   -0.07    0.97 
 -10  -9  -1   10.68    2.21 
 -10   9  -1    9.19    1.79 
 -11  -9  -1    1.96    1.54 
 -11   9  -1    2.39    1.36 
 -12  -9  -1    4.90    1.91 
 -12   9  -1    6.71    1.87 
 -13  -9  -1    4.85    2.08 
 -13   9  -1    3.44    1.74 
 -14  -9  -1   30.27    3.81 
 -14   9  -1   27.61    3.39 
 -14 -10   1    0.67    1.98 
 -14  10   1   -0.16    1.57 
 -13 -10   1    9.99    2.40 
 -13  10   1    8.88    2.27 
 -12 -10   1   13.79    2.52 
 -12  10   1    8.63    2.20 
 -11 -10   1   65.68    4.39 
 -11  10   1   57.78    3.93 
 -10 -10   1   14.54    2.39 
 -10  10   1   19.12    2.41 
  -9 -10   1   89.31    4.58 
  -9  10   1   89.17    4.40 
  -8 -10   1   23.86    2.49 
  -8 -10   1   27.33    1.81 
  -8  10   1   32.16    2.56 
   7 -10  -1   43.82    2.34 
  -7 -10   1   42.92    2.86 
  -7 -10   1   40.17    2.06 
  -7  10   1   40.95    2.68 
  -6 -10   1   29.71    2.22 
  -6 -10   1   29.52    1.48 
   6 -10  -1   29.76    1.83 
   6  10  -1   26.36    1.55 
  -6  10   1   26.68    2.07 
  -5 -10   1   18.99    1.81 
  -5 -10   1   20.80    1.28 
   5 -10  -1   19.29    1.56 
  -5  10   1   21.84    1.85 
   5  10  -1   19.82    1.25 
   4 -10  -1    0.33    0.53 
  -4 -10   1    0.18    0.42 
  -4 -10   1   -0.03    0.51 
   4  10  -1    0.44    0.39 
  -4  10   1   -0.07    0.57 
   3 -10  -1    3.19    0.73 
  -3 -10   1    3.20    0.66 
  -3 -10   1    2.30    0.75 
   3  10  -1    3.63    0.59 
  -3  10   1    3.77    0.84 
   2 -10  -1   39.11    1.97 
  -2 -10   1   42.46    2.04 
   2  10  -1   41.96    1.68 
  -2  10   1   41.36    1.95 
  -1 -10   1  174.76    4.74 
  -1 -10   1  171.08    4.66 
   1  10  -1  170.39    4.53 
   0 -10  -1  112.70    3.53 
   0 -10   1  112.74    3.52 
   0 -10   1  116.63    3.29 
   0 -10  -1  115.03    3.25 
   0  10   1  113.55    3.30 
  -1 -10  -1  245.64    6.27 
  -1 -10  -1  255.51    6.37 
   1 -10   1  245.29    6.36 
   1 -10   1  248.34    5.78 
   1  10   1  260.07    5.99 
  -1  10  -1  252.47    6.52 
  -2 -10  -1  100.05    3.21 
  -2 -10  -1   96.44    3.38 
   2 -10   1   99.20    3.35 
  -2  10  -1   98.42    3.47 
   2  10   1  106.39    2.75 
   3 -10   1  159.48    4.77 
  -3 -10  -1  162.61    5.04 
   3  10   1  168.10    3.98 
  -3  10  -1  163.32    5.05 
  -4 -10  -1   15.80    1.57 
   4 -10   1   16.55    1.40 
  -4  10  -1   16.96    1.57 
   4  10   1   18.16    0.93 
  -5 -10  -1    5.41    1.13 
   5 -10   1    3.36    0.82 
   5  10   1    4.84    0.61 
  -5  10  -1    3.51    0.97 
   6 -10   1    0.29    0.59 
  -6 -10  -1    0.09    0.41 
  -6 -10  -1    0.05    0.64 
  -6  10  -1    0.26    0.70 
  -7 -10  -1   24.30    2.36 
  -7  10  -1   19.17    2.03 
  -8 -10  -1    8.27    1.73 
  -8  10  -1    7.33    1.50 
  -9 -10  -1   57.29    3.73 
  -9  10  -1   57.24    3.49 
 -10 -10  -1   17.73    2.60 
 -10  10  -1   18.29    2.39 
 -11 -10  -1   50.87    3.99 
 -11  10  -1   53.78    3.68 
 -12 -10  -1   20.89    3.04 
 -12  10  -1   24.71    2.92 
 -13 -10  -1   22.11    3.24 
 -13  10  -1   23.91    3.07 
 -14 -10  -1    1.48    2.07 
 -14  10  -1   -0.30    1.59 
 -14 -11   1    0.53    1.78 
 -14  11   1   -0.41    1.51 
 -13 -11   1   43.61    4.32 
 -13  11   1   42.05    3.94 
 -12 -11   1    2.52    1.63 
 -12  11   1    2.99    1.59 
 -11 -11   1    8.72    2.19 
 -11  11   1   11.23    2.11 
 -10 -11   1   -2.15    0.83 
 -10  11   1    1.38    1.18 
  -9 -11   1   18.02    2.40 
  -9  11   1   16.76    2.29 
  -8 -11   1    2.25    1.14 
   8 -11  -1    3.73    1.07 
  -8  11   1    3.91    1.26 
  -7 -11   1   28.47    2.50 
   7 -11  -1   25.98    1.94 
  -7  11   1   27.85    2.28 
   7  11  -1   29.44    1.73 
   6 -11  -1    2.57    0.87 
  -6 -11   1    2.33    0.68 
  -6 -11   1    3.75    1.11 
   6  11  -1    3.64    0.75 
  -6  11   1    2.42    1.00 
   5 -11  -1  155.24    4.81 
  -5 -11   1  141.00    5.17 
  -5 -11   1  150.95    4.21 
   5  11  -1  150.59    4.20 
  -5  11   1  154.93    5.20 
  -4 -11   1    3.36    0.72 
   4 -11  -1    2.88    0.80 
  -4 -11   1    2.53    0.90 
  -4  11   1    2.81    0.87 
   4  11  -1    5.11    0.70 
  -3 -11   1   65.37    2.83 
   3 -11  -1   70.32    2.76 
  -3  11   1   63.54    2.76 
   3  11  -1   64.56    2.26 
  -2 -11   1   30.12    1.78 
  -2 -11   1   33.61    1.70 
   2 -11  -1   30.82    1.78 
  -2  11   1   26.25    1.68 
   2  11  -1   33.98    1.53 
  -1 -11   1   76.85    2.81 
   1 -11  -1   78.36    2.95 
   1 -11  -1   84.31    2.38 
  -1 -11   1   77.47    2.80 
   1  11  -1   80.04    2.69 
   0 -11  -1    0.13    0.46 
   0 -11   1    0.67    0.54 
   0 -11  -1    0.21    0.40 
   0 -11   1    0.48    0.43 
   0  11   1   -0.14    0.42 
   1 -11   1    3.38    0.52 
   1 -11   1    3.57    0.78 
  -1 -11  -1    2.03    0.64 
  -1 -11  -1    2.74    0.66 
  -1  11  -1    4.03    0.81 
   1  11   1    3.69    0.61 
  -2 -11  -1   -0.20    0.49 
  -2 -11  -1    0.46    0.64 
   2 -11   1    0.21    0.49 
   2  11   1    1.19    0.52 
  -2  11  -1   -0.24    0.60 
   3 -11   1  167.45    5.05 
  -3 -11  -1  170.42    5.25 
  -3 -11  -1  174.02    4.82 
  -3  11  -1  168.79    5.28 
   3  11   1  175.67    4.22 
  -4 -11  -1    1.70    0.79 
   4 -11   1    3.91    0.86 
  -4  11  -1    3.11    0.92 
   4  11   1    2.50    0.47 
  -5 -11  -1  129.62    4.82 
   5 -11   1  132.23    4.40 
  -5 -11  -1  130.10    3.99 
   5  11   1  133.32    3.48 
  -5  11  -1  124.83    4.68 
   6 -11   1    2.20    0.85 
  -6 -11  -1    1.11    0.88 
  -6  11  -1    2.49    0.98 
  -7 -11  -1  105.57    4.68 
  -7  11  -1  103.84    4.48 
  -8 -11  -1    0.93    1.09 
  -8  11  -1    1.57    1.03 
  -9 -11  -1   15.72    2.40 
  -9  11  -1   14.49    2.16 
 -10 -11  -1   -2.39    0.92 
 -10  11  -1   -0.02    0.98 
 -11 -11  -1    2.31    1.66 
 -11  11  -1   -0.27    1.09 
 -12 -11  -1   -1.41    1.34 
 -12  11  -1    2.90    1.60 
 -13 -11  -1   21.02    3.23 
 -13  11  -1   21.79    3.06 
 -14 -11  -1    3.83    2.04 
 -14  11  -1   -1.23    1.38 
 -14 -12   1   -0.16    1.70 
 -13 -12   1   12.77    2.81 
 -13  12   1   15.50    2.86 
 -12 -12   1    6.79    2.13 
 -12  12   1    8.53    2.24 
 -11 -12   1   56.86    4.14 
 -11  12   1   65.40    4.23 
 -10 -12   1   15.45    2.58 
 -10  12   1   14.36    2.33 
  -9 -12   1   35.58    3.20 
  -9  12   1   32.88    2.95 
   8 -12  -1   41.35    2.46 
  -8 -12   1   36.74    2.97 
  -8  12   1   40.09    2.95 
   7 -12  -1   71.89    3.26 
  -7 -12   1   70.62    3.77 
  -7  12   1   73.62    3.76 
  -6 -12   1   23.94    2.22 
  -6 -12   1   22.56    1.48 
   6 -12  -1   26.21    1.92 
   6  12  -1   23.52    1.46 
  -6  12   1   23.97    2.18 
  -5 -12   1   29.76    1.66 
  -5 -12   1   35.93    2.35 
   5 -12  -1   31.51    2.00 
  -5  12   1   31.20    2.22 
   5  12  -1   27.74    1.54 
   4 -12  -1   -0.45    0.52 
  -4 -12   1    1.45    0.72 
  -4 -12   1    0.09    0.49 
   4  12  -1    0.74    0.47 
  -4  12   1    0.99    0.73 
  -3 -12   1    0.29    0.59 
   3 -12  -1    1.50    0.64 
   3  12  -1    0.96    0.49 
  -3  12   1    0.26    0.56 
  -2 -12   1   39.74    1.90 
   2 -12  -1   34.60    1.97 
  -2 -12   1   36.87    2.01 
   2  12  -1   37.82    1.72 
  -2  12   1   37.03    1.99 
  -1 -12   1  219.79    5.99 
   1 -12  -1  219.61    6.11 
   1 -12  -1  234.72    5.44 
  -1 -12   1  220.72    5.97 
   1  12  -1  230.05    5.88 
   0 -12   1   60.81    2.24 
   0 -12  -1   57.38    2.48 
   0 -12  -1   59.42    2.22 
   0 -12   1   57.17    2.48 
   0  12   1   60.50    2.33 
   1 -12   1  216.23    5.20 
  -1 -12  -1  216.26    5.77 
   1 -12   1  209.40    5.86 
  -1 -12  -1  216.98    5.83 
  -1  12  -1  209.91    5.91 
   1  12   1  211.45    5.38 
  -2 -12  -1  108.07    3.61 
  -2 -12  -1  110.21    3.78 
   2 -12   1  110.24    3.79 
  -2  12  -1  110.13    3.87 
   2  12   1  111.80    3.11 
   3 -12   1  177.79    5.35 
  -3 -12  -1  184.25    5.10 
  -3 -12  -1  177.05    5.50 
  -3  12  -1  174.43    5.51 
   3  12   1  177.98    4.41 
  -4 -12  -1   38.20    2.31 
   4 -12   1   33.61    2.07 
   4  12   1   38.55    1.47 
  -4  12  -1   36.89    2.26 
   5 -12   1    5.79    1.10 
  -5 -12  -1    7.32    1.02 
  -5 -12  -1    4.89    1.19 
  -5  12  -1    6.40    1.26 
   6 -12   1    0.42    0.70 
  -6 -12  -1   -0.25    0.54 
  -6 -12  -1    0.41    0.78 
  -6  12  -1   -0.39    0.69 
  -7 -12  -1    6.31    1.07 
  -7 -12  -1    7.81    1.60 
   7 -12   1    7.75    1.35 
  -7  12  -1    6.73    1.46 
  -8 -12  -1    4.90    1.47 
  -8  12  -1    2.81    1.24 
  -9 -12  -1   27.36    2.92 
  -9  12  -1   34.15    2.95 
 -10 -12  -1   21.31    2.79 
 -10  12  -1   23.01    2.72 
 -11 -12  -1   58.55    4.33 
 -11  12  -1   55.86    3.98 
 -12 -12  -1   24.26    3.32 
 -12  12  -1   23.89    3.09 
 -13 -12  -1   18.05    3.12 
 -13  12  -1   16.15    2.76 
 -14 -12  -1    1.03    1.60 
 -13 -13   1    3.53    2.19 
 -13  13   1    1.50    1.85 
 -12 -13   1   36.11    3.96 
 -12  13   1   44.14    3.93 
 -11 -13   1   -1.67    1.29 
 -11  13   1    2.26    1.57 
 -10 -13   1    9.51    2.06 
 -10  13   1    4.98    1.70 
  -9 -13   1    3.76    1.62 
  -9  13   1    2.10    1.29 
   8 -13  -1    6.67    1.37 
  -8 -13   1    5.51    1.55 
  -8  13   1    6.58    1.66 
  -7 -13   1    2.14    1.21 
   7 -13  -1    0.93    0.84 
  -7  13   1    0.29    1.00 
  -6 -13   1  124.94    5.05 
  -6 -13   1  126.63    3.96 
   6 -13  -1  131.48    4.60 
  -6  13   1  129.01    5.02 
  -5 -13   1    8.23    1.43 
   5 -13  -1    7.83    1.26 
  -5 -13   1    8.34    1.06 
   5  13  -1    6.90    0.86 
  -5  13   1    7.70    1.42 
  -4 -13   1  119.68    3.82 
  -4 -13   1  119.69    4.45 
   4 -13  -1  120.48    4.22 
  -4  13   1  111.85    4.32 
   4  13  -1  121.86    3.58 
  -3 -13   1   10.22    1.34 
   3 -13  -1    8.19    1.21 
   3  13  -1   12.27    1.03 
  -3  13   1   12.08    1.40 
   2 -13  -1   87.64    3.38 
  -2 -13   1   91.19    3.38 
  -2 -13   1   87.88    3.20 
   2  13  -1   86.44    2.93 
  -1 -13   1   38.98    1.97 
   1 -13  -1   39.13    1.59 
  -1 -13   1   38.04    2.02 
   1 -13  -1   36.52    2.06 
  -1  13   1   36.63    1.92 
   1  13  -1   36.17    1.83 
   0 -13   1    6.93    1.05 
   0 -13   1    7.47    0.88 
   0 -13  -1    5.68    0.99 
   0 -13  -1    7.01    0.86 
   0  13   1    8.15    0.95 
   1 -13   1   20.83    1.55 
  -1 -13  -1   18.55    1.38 
  -1 -13  -1   15.80    1.42 
   1 -13   1   18.31    1.09 
   1  13   1   20.90    1.28 
  -2 -13  -1   14.92    1.40 
   2 -13   1   14.39    1.44 
  -2 -13  -1   16.09    1.42 
   2  13   1   15.72    1.08 
  -2  13  -1   15.16    1.48 
   3 -13   1   13.23    1.45 
  -3 -13  -1    8.76    1.15 
  -3 -13  -1   13.03    1.47 
  -3  13  -1   15.89    1.61 
   3  13   1   10.97    0.88 
   4 -13   1   54.69    2.73 
  -4 -13  -1   54.66    2.90 
  -4  13  -1   48.59    2.70 
   4  13   1   56.22    1.89 
   5 -13   1   37.41    2.26 
  -5 -13  -1   34.18    2.49 
  -5  13  -1   37.08    2.47 
   6 -13   1  184.99    5.80 
  -6 -13  -1  177.36    5.19 
  -6 -13  -1  185.16    6.39 
  -6  13  -1  164.33    6.09 
   7 -13   1   17.14    1.85 
  -7 -13  -1   11.19    1.88 
  -7 -13  -1   19.61    1.56 
  -7  13  -1   18.40    2.13 
  -8 -13  -1   58.11    3.66 
  -8  13  -1   53.53    3.40 
  -9 -13  -1   -0.61    1.25 
  -9  13  -1    1.03    1.21 
 -10 -13  -1   15.72    2.59 
 -10  13  -1   16.55    2.49 
 -11 -13  -1   -1.67    1.12 
 -11  13  -1   -0.06    1.33 
 -12 -13  -1    6.17    2.16 
 -12  13  -1    4.71    1.93 
 -13 -13  -1    4.46    2.19 
 -13  13  -1    2.71    1.70 
 -13 -14   1    2.77    2.03 
 -13  14   1   -1.94    1.51 
 -12 -14   1   26.69    3.57 
 -12  14   1   23.44    3.23 
 -11 -14   1    1.37    1.59 
 -11  14   1    1.82    1.55 
 -10 -14   1   79.89    4.76 
 -10  14   1   82.93    4.69 
  -9 -14   1    2.38    1.41 
  -9  14   1    3.06    1.44 
  -8 -14   1   87.79    4.56 
   8 -14  -1   83.22    3.83 
  -8  14   1   84.99    4.48 
   7 -14  -1   11.08    1.61 
  -7 -14   1    9.68    1.79 
  -7  14   1   13.99    2.01 
  -6 -14   1   36.99    1.99 
  -6 -14   1   38.07    2.75 
   6 -14  -1   32.76    2.27 
  -6  14   1   35.33    2.60 
  -5 -14   1    3.26    0.82 
   5 -14  -1    1.84    0.88 
  -5 -14   1    2.04    0.98 
   5  14  -1    1.91    0.67 
  -5  14   1    0.57    0.82 
   4 -14  -1    8.31    1.30 
  -4 -14   1    6.32    1.25 
  -4  14   1    7.19    1.34 
   4  14  -1    6.18    0.86 
   3 -14  -1    8.77    1.27 
  -3 -14   1    6.15    1.14 
   3  14  -1    6.70    0.88 
  -3  14   1    5.16    1.07 
  -2 -14   1  164.77    5.02 
  -2 -14   1  147.86    4.69 
   2  14  -1  153.62    4.45 
  -1 -14   1   12.23    1.35 
   1 -14  -1   10.58    0.90 
  -1 -14   1   10.11    1.17 
   1 -14  -1   10.50    1.32 
  -1  14   1   10.40    1.19 
   1  14  -1   10.76    1.11 
   0 -14   1  234.85    6.51 
   0 -14   1  235.97    6.09 
   0 -14  -1  235.19    6.05 
   0 -14  -1  224.78    6.46 
   0  14   1  232.64    6.18 
  -1 -14  -1   25.32    1.79 
  -1 -14  -1   28.78    1.72 
   1 -14   1   20.57    1.25 
   1 -14   1   25.41    1.78 
   1  14   1   28.23    1.51 
   2 -14   1  191.55    5.82 
  -2 -14  -1  197.51    5.67 
  -2 -14  -1  194.23    5.78 
   2  14   1  192.53    5.02 
  -2  14  -1  193.62    5.90 
   3 -14   1    3.40    0.96 
  -3 -14  -1    3.26    0.93 
  -3 -14  -1    3.02    0.92 
   3  14   1    3.63    0.63 
  -3  14  -1    2.80    0.96 
   4 -14   1   67.54    3.11 
  -4 -14  -1   69.23    3.31 
  -4  14  -1   61.93    3.18 
   5 -14   1    1.03    0.80 
  -5 -14  -1   -0.11    0.72 
  -5  14  -1    1.02    1.00 
   6 -14   1    0.49    0.81 
  -6 -14  -1    0.39    0.69 
  -6 -14  -1    1.19    0.97 
  -6  14  -1   -0.55    0.97 
  -7 -14  -1    1.34    1.07 
   7 -14   1    1.80    1.04 
  -7  14  -1    3.75    1.33 
  -8 -14  -1   35.52    3.16 
  -8  14  -1   40.26    2.99 
  -9 -14  -1    0.83    1.20 
  -9  14  -1   -0.50    1.15 
 -10 -14  -1   58.81    4.17 
 -10  14  -1   64.60    4.12 
 -11 -14  -1    8.95    2.18 
 -11  14  -1    7.90    2.07 
 -12 -14  -1   65.93    4.94 
 -12  14  -1   72.24    4.80 
 -13 -14  -1    0.85    1.84 
 -13  14  -1   -1.50    1.28 
 -13 -15   1   19.50    3.37 
 -12 -15   1   26.02    3.60 
 -12  15   1   26.18    3.39 
 -11 -15   1   17.11    2.94 
 -11  15   1   15.71    2.72 
 -10 -15   1    4.05    1.72 
 -10  15   1    9.74    2.11 
   9 -15  -1    0.29    0.91 
  -9 -15   1    0.38    1.15 
  -9  15   1   -0.66    1.14 
   8 -15  -1   14.52    1.88 
  -8 -15   1   12.98    2.16 
  -8  15   1   14.60    2.25 
  -7 -15   1   29.56    2.76 
   7 -15  -1   27.86    2.24 
  -7  15   1   32.36    2.80 
   6 -15  -1  111.70    4.46 
  -6 -15   1  118.99    5.05 
  -6  15   1  116.82    4.92 
  -5 -15   1   80.44    3.86 
  -5 -15   1   85.10    3.24 
   5 -15  -1   80.97    3.61 
  -5  15   1   81.76    3.89 
   4 -15  -1   86.61    3.70 
  -4 -15   1   86.55    3.87 
   4  15  -1   95.23    3.09 
  -4  15   1   88.73    3.85 
   3 -15  -1   31.92    2.14 
  -3 -15   1   35.82    2.28 
  -3 -15   1   35.95    2.08 
  -3  15   1   39.46    2.32 
   3  15  -1   32.54    1.73 
   2 -15  -1   21.07    1.83 
  -2 -15   1   25.35    1.85 
  -2 -15   1   27.41    1.86 
   2  15  -1   24.62    1.57 
   1 -15  -1    0.08    0.45 
  -1 -15   1    0.53    0.63 
   1 -15  -1    0.02    0.67 
  -1 -15   1   -0.36    0.51 
  -1  15   1    1.30    0.65 
   1  15  -1    0.58    0.61 
   0 -15   1    3.14    0.72 
   0 -15   1    2.16    0.80 
   0 -15  -1    2.27    0.69 
   0 -15  -1    1.31    0.71 
   0  15  -1    1.37    0.70 
   0  15   1    1.31    0.61 
   1 -15   1    7.31    0.83 
  -1 -15  -1    8.91    1.30 
  -1 -15  -1    8.85    1.13 
   1 -15   1    9.96    1.34 
   1  15   1    8.18    0.95 
  -2 -15  -1   27.57    1.90 
  -2 -15  -1   24.57    1.80 
   2 -15   1   25.21    1.88 
   2  15   1   27.93    1.48 
  -2  15  -1   25.21    1.92 
   3 -15   1   11.70    1.52 
  -3 -15  -1   11.10    1.38 
  -3 -15  -1   11.64    1.49 
  -3  15  -1   13.61    1.59 
  -4 -15  -1   54.75    3.04 
   4 -15   1   54.60    2.94 
  -4 -15  -1   58.76    2.74 
  -4  15  -1   52.84    2.93 
   5 -15   1   35.58    2.38 
  -5 -15  -1   39.36    2.67 
  -5  15  -1   42.26    2.73 
  -6 -15  -1  103.76    4.67 
   6 -15   1   97.12    4.17 
  -6 -15  -1  104.75    3.81 
  -6  15  -1  103.32    4.62 
  -7 -15  -1   66.59    3.90 
   7 -15   1   55.90    3.17 
  -7  15  -1   70.17    3.86 
  -8 -15  -1   44.33    3.42 
  -8  15  -1   45.64    3.27 
  -9 -15  -1   20.16    2.75 
  -9  15  -1   19.55    2.60 
 -10 -15  -1    1.83    1.57 
 -10  15  -1    4.64    1.77 
 -11 -15  -1    1.20    1.59 
 -11  15  -1    0.23    1.28 
 -12 -15  -1    0.02    1.67 
 -12  15  -1    4.79    1.87 
 -13 -15  -1   10.79    2.78 
 -13 -16   1    7.86    2.59 
 -12 -16   1   -1.31    1.40 
 -12  16   1   -0.26    1.51 
 -11 -16   1   30.20    3.70 
 -11  16   1   27.99    3.33 
 -10 -16   1   14.85    2.64 
 -10  16   1   25.51    3.08 
  -9 -16   1   77.80    4.60 
   9 -16  -1   79.71    4.01 
  -9  16   1   71.74    4.48 
  -8 -16   1    8.30    1.94 
   8 -16  -1    5.64    1.43 
  -8  16   1    4.20    1.52 
   7 -16  -1   59.04    3.27 
  -7 -16   1   66.17    3.89 
  -7  16   1   59.37    3.64 
   6 -16  -1    3.87    1.18 
  -6 -16   1    2.27    1.17 
  -6  16   1    4.18    1.32 
  -5 -16   1   -0.27    0.79 
   5 -16  -1    2.28    1.08 
  -5 -16   1    1.92    0.83 
  -5  16   1   -1.42    0.82 
  -4 -16   1   -0.61    0.71 
   4 -16  -1   -0.31    0.70 
  -4  16   1    0.02    0.76 
  -3 -16   1   14.25    1.49 
   3 -16  -1   13.74    1.65 
  -3 -16   1   14.13    1.67 
  -3  16   1   16.74    1.72 
   3  16  -1   11.98    1.18 
  -2 -16   1    6.23    1.16 
  -2 -16   1    5.03    1.12 
   2 -16  -1    7.77    1.33 
   2  16  -1    5.30    0.93 
   1 -16  -1   89.08    3.71 
  -1 -16   1   96.83    3.72 
  -1 -16   1   98.10    3.57 
  -1  16   1   89.47    3.47 
   1  16  -1   93.69    3.42 
   0 -16  -1    7.06    0.98 
   0 -16   1    6.57    1.01 
   0 -16   1    7.07    1.29 
   0 -16  -1    8.13    1.33 
   0  16   1   10.67    1.19 
   0  16  -1    8.50    1.19 
  -1 -16  -1  141.36    4.51 
   1 -16   1  149.32    4.05 
   1 -16   1  138.72    4.82 
  -1 -16  -1  137.71    4.74 
   1  16   1  134.03    4.19 
   2 -16   1   11.53    1.53 
  -2 -16  -1   12.49    1.43 
  -2 -16  -1   10.20    1.41 
   2  16   1   10.85    1.05 
  -2  16  -1   11.52    1.48 
  -3 -16  -1   70.67    3.16 
   3 -16   1   70.57    3.35 
  -3 -16  -1   68.27    3.27 
  -3  16  -1   73.61    3.38 
  -4 -16  -1   16.67    1.90 
  -4 -16  -1   17.82    1.66 
   4 -16   1   15.47    1.83 
  -4  16  -1   20.14    1.99 
   5 -16   1   21.36    2.05 
  -5 -16  -1   25.03    2.35 
  -5  16  -1   21.80    2.20 
   6 -16   1   -0.11    0.88 
  -6 -16  -1    0.15    0.72 
  -6 -16  -1   -0.19    0.83 
  -6  16  -1   -1.40    0.82 
  -7 -16  -1   -0.34    1.00 
   7 -16   1    1.28    1.02 
  -8 -16  -1   -1.14    1.11 
  -8  16  -1   -0.25    1.24 
  -9 -16  -1   42.64    3.70 
  -9  16  -1   36.27    3.37 
 -10 -16  -1    6.40    1.99 
 -10  16  -1    8.84    2.22 
 -11 -16  -1   65.24    4.66 
 -11  16  -1   69.66    4.69 
 -12 -16  -1    2.51    1.92 
 -12  16  -1    2.75    1.77 
 -13 -16  -1   20.12    3.39 
 -12 -17   1   -0.77    1.54 
 -12  17   1    3.40    1.95 
 -11 -17   1   20.66    3.17 
 -11  17   1   25.23    3.40 
 -10 -17   1   -1.51    1.16 
 -10  17   1   -0.87    1.34 
   9 -17  -1    0.40    1.09 
  -9 -17   1    2.21    1.40 
  -9  17   1    0.68    1.38 
  -8 -17   1    2.55    1.39 
   8 -17  -1    0.25    1.04 
  -8  17   1    0.35    1.25 
   7 -17  -1   55.10    3.26 
  -7 -17   1   56.39    3.68 
  -7  17   1   53.87    3.57 
  -6 -17   1    4.36    1.40 
   6 -17  -1    1.39    1.03 
  -6  17   1    2.45    1.12 
  -5 -17   1   93.51    4.37 
   5 -17  -1   96.92    4.27 
  -5 -17   1  107.66    3.96 
  -5  17   1  103.53    4.55 
   4 -17  -1   17.39    1.96 
  -4 -17   1   19.39    2.04 
  -4  17   1   29.44    2.28 
  -3 -17   1   63.29    3.18 
  -3 -17   1   62.92    3.00 
   3 -17  -1   71.97    3.39 
  -3  17   1   61.07    3.14 
  -2 -17   1   19.88    1.77 
  -2 -17   1   19.54    1.78 
   2 -17  -1   19.96    1.97 
   2  17  -1   19.21    1.52 
  -1 -17   1   19.88    1.83 
   1 -17  -1   17.87    1.84 
  -1 -17   1   20.19    1.65 
  -1  17   1   19.44    1.60 
   1  17  -1   22.76    1.65 
   0 -17  -1    4.90    1.12 
   0 -17  -1    5.45    0.96 
   0 -17   1    5.24    0.96 
   0 -17   1    4.04    1.06 
   0  17  -1    4.48    1.02 
   0  17   1    5.66    1.02 
  -1 -17  -1   14.94    1.45 
  -1 -17  -1   16.33    1.71 
   1 -17   1   15.34    1.73 
   1  17   1   16.74    1.36 
  -2 -17  -1    2.37    0.92 
   2 -17   1    1.92    0.96 
  -2 -17  -1    0.42    0.72 
  -2  17  -1    1.73    0.89 
   3 -17   1   26.23    2.22 
  -3 -17  -1   25.72    2.09 
  -3 -17  -1   28.54    2.04 
  -3  17  -1   26.18    2.08 
   4 -17   1   31.39    2.37 
  -4 -17  -1   34.97    2.53 
  -4 -17  -1   33.27    2.27 
  -4  17  -1   35.02    2.50 
   5 -17   1   73.42    3.63 
  -5 -17  -1   77.56    3.89 
  -5  17  -1   79.53    3.99 
   6 -17   1    6.51    1.48 
  -6 -17  -1    7.85    1.71 
  -6  17  -1    5.85    1.63 
  -7 -17  -1   71.58    4.16 
   7 -17   1   78.86    3.99 
  -7  17  -1   86.20    4.42 
  -8 -17  -1    2.34    1.44 
   8 -17   1   -0.22    0.94 
  -8  17  -1   -2.08    1.12 
  -9 -17  -1   21.56    2.92 
  -9  17  -1   22.57    2.99 
 -10 -17  -1    0.72    1.43 
 -10  17  -1    1.32    1.61 
 -11 -17  -1    0.08    1.55 
 -11  17  -1    3.31    1.74 
 -12 -17  -1   -1.04    1.73 
 -12  17  -1    0.71    1.70 
 -12 -18   1   20.65    3.48 
 -11 -18   1    8.34    2.44 
 -11  18   1    9.66    2.44 
 -10 -18   1   35.75    3.80 
 -10  18   1   32.85    3.53 
   9 -18  -1   33.20    2.88 
  -9 -18   1   41.12    3.73 
  -9  18   1   35.88    3.45 
  -8 -18   1   43.11    3.44 
   8 -18  -1   41.05    2.96 
  -8  18   1   43.82    3.41 
   7 -18  -1   47.06    3.02 
  -7 -18   1   33.87    3.12 
  -7  18   1   42.02    3.25 
  -6 -18   1   20.09    2.42 
   6 -18  -1   18.90    2.15 
  -6  18   1   17.56    2.25 
  -5 -18   1    0.11    0.95 
   5 -18  -1    0.29    0.88 
  -5  18   1   -0.55    1.00 
  -4 -18   1    1.56    1.04 
   4 -18  -1    0.92    0.89 
  -4  18   1    2.87    1.16 
   3 -18  -1    5.35    1.31 
  -3 -18   1    7.04    1.31 
  -3 -18   1    8.54    1.51 
  -3  18   1    5.72    1.35 
  -2 -18   1    9.96    1.47 
   2 -18  -1   10.60    1.61 
  -2 -18   1    9.31    1.44 
   2  18  -1   10.83    1.27 
   1 -18  -1   25.29    2.16 
  -1 -18   1   26.87    1.90 
  -1 -18   1   23.57    2.06 
   1  18  -1   25.68    1.83 
  -1  18   1   27.63    1.92 
   0 -18   1   99.46    3.44 
   0 -18  -1   87.30    3.81 
   0 -18   1   95.58    3.93 
   0  18  -1   81.39    3.48 
   0  18   1   87.30    3.41 
  -1 -18  -1   27.22    2.11 
  -1 -18  -1   26.49    1.91 
   1 -18   1   24.23    2.16 
  -2 -18  -1   66.39    3.18 
  -2 -18  -1   66.20    3.12 
   2 -18   1   61.18    3.23 
  -2  18  -1   61.51    3.16 
  -3 -18  -1   64.18    3.14 
  -3 -18  -1   62.47    3.21 
   3 -18   1   60.99    3.24 
  -3  18  -1   56.82    3.17 
  -4 -18  -1   14.28    1.69 
   4 -18   1   13.81    1.87 
  -4 -18  -1   14.75    1.92 
  -4  18  -1   12.35    1.83 
  -5 -18  -1    4.76    1.40 
   5 -18   1    4.91    1.35 
  -5  18  -1    5.91    1.47 
   6 -18   1    6.12    1.45 
  -6 -18  -1    5.32    1.49 
  -6  18  -1    4.51    1.41 
   7 -18   1    1.57    1.24 
  -7 -18  -1    0.88    1.16 
  -7  18  -1    5.34    1.51 
  -8 -18  -1   43.08    3.64 
   8 -18   1   37.00    2.90 
  -8  18  -1   47.00    3.58 
  -9 -18  -1   28.87    3.29 
  -9  18  -1   22.84    3.05 
 -10 -18  -1   34.64    3.76 
 -10  18  -1   32.49    3.53 
 -11 -18  -1   29.13    3.65 
 -11  18  -1   26.45    3.42 
 -12 -18  -1   28.17    3.78 
 -12 -19   1   20.58    3.47 
 -11 -19   1    4.57    2.05 
 -11  19   1    8.04    2.34 
 -10 -19   1    1.72    1.61 
 -10  19   1    2.11    1.66 
  -9 -19   1    0.72    1.51 
   9 -19  -1   -0.10    1.22 
  -9  19   1    2.88    1.63 
  -8 -19   1   29.44    3.24 
   8 -19  -1   29.49    2.78 
  -8  19   1   32.19    3.23 
   7 -19  -1   -0.15    1.04 
  -7 -19   1   -0.41    1.08 
  -7  19   1   -1.11    1.10 
  -6 -19   1   70.37    4.10 
   6 -19  -1   78.16    3.95 
  -6  19   1   65.13    3.89 
  -5 -19   1   -0.15    1.02 
   5 -19  -1    0.20    0.94 
  -5  19   1   -2.12    0.83 
  -4 -19   1  154.05    5.79 
   4 -19  -1  150.07    5.66 
  -4  19   1  152.02    5.71 
  -3 -19   1    2.15    1.01 
   3 -19  -1    2.42    1.08 
  -3 -19   1    3.33    1.12 
  -3  19   1    3.89    1.22 
   2 -19  -1  118.05    4.78 
  -2 -19   1  122.00    4.62 
  -2 -19   1  123.81    4.68 
   1 -19  -1    9.27    1.61 
  -1 -19   1   10.71    1.40 
  -1 -19   1   11.12    1.61 
   1  19  -1    6.24    1.19 
  -1  19   1    9.87    1.39 
   0 -19  -1    7.93    1.47 
   0 -19   1   10.84    1.61 
   0  19   1    9.38    1.29 
   0  19  -1    9.15    1.39 
   1 -19   1    0.38    0.89 
  -1 -19  -1    0.27    0.87 
  -1 -19  -1   -0.17    0.71 
  -2 -19  -1   23.66    2.01 
   2 -19   1   22.60    2.18 
  -2 -19  -1   23.03    2.09 
  -2  19  -1   19.40    1.99 
  -3 -19  -1    5.82    1.31 
   3 -19   1    7.19    1.48 
  -3 -19  -1    6.36    1.39 
  -3  19  -1    4.33    1.27 
   4 -19   1  127.87    5.25 
  -4 -19  -1  144.83    5.11 
  -4 -19  -1  145.68    5.47 
  -4  19  -1  131.87    5.33 
  -5 -19  -1    2.60    1.05 
   5 -19   1    3.62    1.24 
  -5 -19  -1    4.44    1.43 
  -5  19  -1    3.68    1.33 
   6 -19   1   97.44    4.58 
  -6 -19  -1  110.12    5.07 
  -6  19  -1   97.27    4.79 
   7 -19   1   -0.50    1.00 
  -7 -19  -1    0.46    1.23 
  -7  19  -1    1.52    1.41 
  -8 -19  -1   37.45    3.51 
   8 -19   1   41.30    3.08 
  -8  19  -1   38.10    3.44 
  -9 -19  -1    1.40    1.54 
  -9  19  -1    0.10    1.50 
 -10 -19  -1    4.80    1.98 
 -10  19  -1   -0.04    1.58 
 -11 -19  -1    1.33    1.67 
 -11  19  -1    1.16    1.88 
 -12 -19  -1    2.37    1.99 
 -11 -20   1   13.81    2.94 
 -11  20   1   10.37    2.79 
 -10 -20   1   37.59    4.03 
 -10  20   1   50.79    4.06 
  -9 -20   1    9.73    2.42 
   9 -20  -1    5.24    1.71 
  -9  20   1    8.77    2.18 
   8 -20  -1   32.60    2.94 
  -8 -20   1   30.80    3.35 
  -8  20   1   32.92    3.29 
  -7 -20   1    9.20    2.09 
   7 -20  -1   12.00    2.03 
  -7  20   1   12.72    2.29 
  -6 -20   1   35.99    3.17 
   6 -20  -1   33.99    2.89 
  -6  20   1   34.78    3.06 
  -5 -20   1   -1.83    0.76 
   5 -20  -1   -1.03    0.98 
  -5  20   1   -1.35    0.98 
   4 -20  -1    0.24    1.02 
  -4 -20   1    1.26    0.98 
  -4 -20   1    2.00    1.09 
  -4  20   1    2.86    1.15 
   3 -20  -1    0.20    0.97 
  -3 -20   1   -0.13    0.81 
  -3 -20   1    0.42    0.97 
  -3  20   1    0.55    0.96 
  -2 -20   1   23.57    2.10 
   2 -20  -1   14.59    1.99 
  -2 -20   1   20.10    2.05 
   1 -20  -1   13.08    1.90 
  -1 -20   1   13.60    1.81 
  -1  20   1   14.78    1.65 
   0 -20  -1  104.24    4.47 
   0 -20   1   99.52    4.26 
   0  20  -1   96.71    3.98 
  -1 -20  -1   32.96    2.44 
   1 -20   1   33.41    2.50 
   2 -20   1   76.90    3.82 
  -2 -20  -1   71.28    3.60 
  -2 -20  -1   67.32    3.37 
  -2  20  -1   70.45    3.50 
  -3 -20  -1    6.19    1.34 
   3 -20   1    6.72    1.51 
  -3 -20  -1    9.02    1.62 
  -3  20  -1    8.13    1.57 
  -4 -20  -1   27.52    2.30 
   4 -20   1   23.89    2.45 
  -4 -20  -1   26.83    2.45 
  -4  20  -1   26.68    2.49 
   5 -20   1    2.17    1.20 
  -5 -20  -1    0.76    1.07 
  -5 -20  -1    1.58    1.10 
  -5  20  -1   -0.27    1.15 
  -6 -20  -1    2.08    1.28 
   6 -20   1    2.14    1.32 
  -6  20  -1    1.52    1.29 
  -7 -20  -1    2.01    1.41 
   7 -20   1    0.95    1.28 
  -7  20  -1   -3.95    0.90 
   8 -20   1   42.54    3.29 
  -8 -20  -1   43.14    3.52 
  -8  20  -1   37.19    3.47 
  -9 -20  -1    3.95    1.87 
  -9  20  -1    6.84    2.15 
 -10 -20  -1   57.95    4.39 
 -10  20  -1   51.93    4.23 
 -11 -20  -1    6.57    2.38 
 -11  20  -1    5.46    2.28 
 -11 -21   1   10.80    2.67 
 -10 -21   1    3.30    1.94 
 -10  21   1    0.96    1.66 
  -9 -21   1    3.72    1.74 
   9 -21  -1    0.89    1.40 
  -9  21   1    5.63    1.77 
  -8 -21   1    3.98    1.77 
   8 -21  -1    4.91    1.60 
  -8  21   1    2.31    1.66 
   7 -21  -1   17.42    2.39 
  -7 -21   1   16.83    2.61 
  -7  21   1   26.01    2.91 
   6 -21  -1   13.33    2.11 
  -6 -21   1   13.07    2.21 
  -6  21   1   12.28    2.12 
   5 -21  -1   32.40    2.86 
  -5 -21   1   35.13    3.00 
  -5  21   1   34.48    2.81 
  -4 -21   1   56.62    3.19 
   4 -21  -1   51.92    3.33 
  -4 -21   1   54.71    3.42 
  -4  21   1   54.92    3.37 
  -3 -21   1  120.81    4.97 
  -3 -21   1  119.93    4.83 
   3 -21  -1  115.56    5.03 
   2 -21  -1   58.94    3.39 
  -2 -21   1   56.33    3.10 
  -2 -21   1   54.42    3.22 
   1 -21  -1   27.67    2.53 
  -1 -21   1   33.14    2.49 
   0 -21   1    5.00    1.27 
   0 -21  -1    7.46    1.64 
   0  21  -1    6.78    1.36 
  -1 -21  -1   -0.89    0.89 
   1 -21   1    1.26    1.03 
   2 -21   1    2.05    1.21 
  -2 -21  -1    1.13    1.19 
  -2 -21  -1    2.36    1.09 
   3 -21   1   54.06    3.41 
  -3 -21  -1   57.79    3.30 
  -3 -21  -1   55.98    3.22 
  -3  21  -1   50.42    3.21 
  -4 -21  -1   45.37    3.11 
  -4 -21  -1   43.66    2.96 
   4 -21   1   44.49    3.21 
  -4  21  -1   47.74    3.24 
  -5 -21  -1   74.17    3.75 
   5 -21   1   75.36    4.07 
  -5 -21  -1   82.62    4.23 
  -5  21  -1   72.55    4.15 
   6 -21   1   45.59    3.37 
  -6 -21  -1   54.13    3.68 
  -6  21  -1   46.74    3.43 
  -7 -21  -1   51.97    3.75 
   7 -21   1   55.64    3.64 
  -7  21  -1   51.70    3.87 
   8 -21   1    9.73    2.01 
  -8 -21  -1   10.44    2.23 
  -8  21  -1   17.54    2.54 
  -9 -21  -1    7.36    2.20 
  -9  21  -1    4.11    1.80 
 -10 -21  -1    0.95    1.57 
 -10  21  -1    2.79    1.99 
 -11 -21  -1    0.60    1.84 
 -10 -22   1    0.80    1.59 
 -10  22   1    2.63    1.68 
  -9 -22   1   38.26    3.88 
   9 -22  -1   40.66    3.43 
  -9  22   1   37.12    3.85 
   8 -22  -1    0.87    1.32 
  -8 -22   1    0.71    1.46 
  -8  22   1    0.50    1.60 
  -7 -22   1   33.73    3.38 
   7 -22  -1   34.09    3.12 
  -7  22   1   35.14    3.39 
  -6 -22   1    1.70    1.36 
   6 -22  -1   -2.25    1.02 
  -6  22   1   -0.73    1.17 
   5 -22  -1    4.83    1.53 
  -5 -22   1    3.44    1.49 
  -5  22   1    6.87    1.73 
   4 -22  -1    0.38    1.12 
  -4 -22   1   -0.06    1.03 
  -4 -22   1    0.75    1.16 
  -4  22   1   -0.53    1.04 
  -3 -22   1    8.03    1.62 
   3 -22  -1    8.52    1.78 
  -3 -22   1    6.50    1.59 
  -2 -22   1    1.16    1.06 
   2 -22  -1    0.04    0.98 
  -2  22   1    0.96    0.99 
   1 -22  -1   73.34    3.92 
  -1 -22   1   75.91    3.90 
   0 -22   1   10.79    1.83 
   0 -22  -1   10.30    1.80 
   1 -22   1  101.22    4.65 
  -1 -22  -1  103.71    4.63 
  -1  22  -1  107.91    4.44 
  -2 -22  -1    2.59    1.18 
   2 -22   1    0.82    1.12 
  -3 -22  -1   51.71    3.24 
   3 -22   1   48.22    3.25 
  -3 -22  -1   47.78    3.07 
  -3  22  -1   46.33    3.14 
  -4 -22  -1    1.22    1.19 
  -4 -22  -1    2.83    1.33 
   4 -22   1    1.06    1.15 
  -4  22  -1    1.25    1.31 
  -5 -22  -1   13.31    2.16 
  -5 -22  -1   13.49    1.98 
   5 -22   1   12.69    2.11 
  -5  22  -1   14.33    2.22 
   6 -22   1    1.20    1.32 
  -6 -22  -1    0.31    1.26 
  -6  22  -1    0.40    1.26 
  -7 -22  -1    9.41    2.16 
   7 -22   1    8.98    1.95 
  -7  22  -1   12.30    2.43 
  -8 -22  -1    0.19    1.39 
   8 -22   1    0.99    1.43 
  -9 -22  -1   35.44    3.81 
  -9  22  -1   34.86    3.79 
 -10 -22  -1    0.40    1.58 
 -10  22  -1    0.39    1.65 
 -10 -23   1    0.33    1.71 
 -10  23   1    1.25    1.99 
   9 -23  -1    1.85    1.44 
  -9 -23   1   -1.29    1.30 
  -9  23   1    0.20    1.73 
  -8 -23   1    4.77    2.01 
   8 -23  -1    6.21    1.85 
  -8  23   1    4.19    1.88 
  -7 -23   1    6.75    1.98 
   7 -23  -1    8.83    1.97 
  -7  23   1    6.55    2.00 
  -6 -23   1   29.34    3.14 
   6 -23  -1   28.57    2.98 
  -6  23   1   30.69    3.13 
   5 -23  -1   37.73    3.26 
  -5 -23   1   37.04    3.23 
  -5  23   1   37.33    3.08 
   4 -23  -1    7.70    1.76 
  -4 -23   1    9.63    1.81 
  -4 -23   1   11.68    2.03 
  -4  23   1    7.29    1.77 
  -3 -23   1   49.11    3.27 
   3 -23  -1   46.49    3.28 
  -2 -23   1   25.34    2.51 
   2 -23  -1   22.82    2.55 
  -1 -23   1   46.78    3.18 
   1 -23  -1   50.33    3.33 
   0 -23  -1    3.10    1.37 
   0 -23   1    4.74    1.36 
   1 -23   1    6.64    1.65 
  -1 -23  -1    4.56    1.37 
  -2 -23  -1    6.40    1.60 
   2 -23   1    6.69    1.63 
  -3 -23  -1   16.64    2.23 
   3 -23   1   23.59    2.61 
  -3  23  -1   17.76    2.25 
   4 -23   1   10.37    1.97 
  -4 -23  -1    7.73    1.79 
  -4  23  -1    9.34    1.94 
  -5 -23  -1   61.06    3.58 
   5 -23   1   61.67    3.90 
  -5 -23  -1   62.67    3.90 
  -5  23  -1   57.19    3.79 
  -6 -23  -1   23.64    2.83 
   6 -23   1   20.36    2.67 
  -6  23  -1   23.41    2.90 
   7 -23   1   19.94    2.72 
  -7 -23  -1   18.13    2.68 
  -7  23  -1   21.20    2.86 
  -8 -23  -1   20.98    3.05 
   8 -23   1   16.40    2.65 
  -8  23  -1   18.06    2.89 
  -9 -23  -1   11.78    2.56 
  -9  23  -1    8.66    2.45 
 -10 -23  -1   -0.47    1.68 
   9 -24  -1    3.51    1.71 
  -9 -24   1    1.36    1.68 
  -9  24   1    0.88    2.03 
   8 -24  -1   60.26    4.11 
  -8 -24   1   61.80    4.47 
  -8  24   1   57.79    4.47 
  -7 -24   1    7.93    2.12 
   7 -24  -1    7.18    1.97 
  -7  24   1    7.38    2.09 
   6 -24  -1   19.58    2.69 
  -6 -24   1   20.02    2.76 
  -6  24   1   20.33    2.76 
  -5 -24   1    1.70    1.42 
   5 -24  -1    0.05    1.30 
  -5  24   1    1.49    1.41 
   4 -24  -1   10.79    2.11 
  -4 -24   1    9.46    1.88 
  -4 -24   1   10.26    1.97 
  -4  24   1    4.82    1.67 
   3 -24  -1    3.68    1.54 
  -3 -24   1    1.08    1.24 
   2 -24  -1   44.26    3.27 
  -2 -24   1   50.47    3.35 
   1 -24  -1   29.08    2.83 
  -1 -24   1   26.85    2.66 
   0 -24  -1   67.58    3.92 
   0 -24   1   71.05    3.99 
   1 -24   1   18.30    2.44 
  -1 -24  -1   24.71    2.61 
  -2 -24  -1   46.74    3.31 
   2 -24   1   45.59    3.32 
   3 -24   1    3.29    1.45 
  -3 -24  -1    7.08    1.68 
  -3  24  -1    3.39    1.45 
   4 -24   1   22.42    2.76 
  -4 -24  -1   19.68    2.46 
  -4 -24  -1   20.43    2.49 
  -4  24  -1   17.85    2.42 
   5 -24   1   -0.01    1.17 
  -5 -24  -1   -0.10    1.22 
  -5 -24  -1    0.07    1.20 
  -5  24  -1   -0.99    1.27 
  -6 -24  -1    8.04    1.93 
   6 -24   1    1.20    1.41 
  -6  24  -1    4.00    1.69 
   7 -24   1    3.33    1.69 
  -7 -24  -1    2.05    1.65 
  -7  24  -1    0.60    1.62 
   8 -24   1   10.44    2.37 
  -8 -24  -1   11.66    2.41 
  -8  24  -1   13.93    2.69 
  -9 -24  -1    7.83    2.41 
  -9  24  -1    8.81    2.41 
  -9 -25   1   -0.81    1.59 
   9 -25  -1    0.44    1.51 
  -9  25   1    2.43    1.88 
  -8 -25   1   10.30    2.46 
   8 -25  -1    8.71    2.27 
  -8  25   1    7.81    2.48 
  -7 -25   1    0.55    1.56 
   7 -25  -1    1.87    1.55 
  -7  25   1    1.36    1.55 
  -6 -25   1   63.04    4.31 
   6 -25  -1   63.61    4.27 
  -6  25   1   57.89    4.16 
  -5 -25   1    6.26    1.92 
   5 -25  -1    3.76    1.72 
  -5  25   1    3.77    1.54 
   4 -25  -1   55.60    3.87 
  -4 -25   1   46.86    3.36 
  -3 -25   1    1.39    1.40 
   3 -25  -1   -0.27    1.13 
   2 -25  -1   32.58    3.15 
  -2 -25   1   36.89    3.04 
   1 -25  -1   -0.37    1.16 
  -1 -25   1   -0.86    1.14 
   0 -25  -1    2.58    1.34 
   0 -25   1    3.67    1.35 
  -1 -25  -1   -0.54    0.95 
   1 -25   1    2.30    1.32 
   2 -25   1    3.20    1.48 
  -2 -25  -1    3.42    1.53 
  -3 -25  -1    0.73    1.31 
   3 -25   1    2.21    1.42 
   4 -25   1   51.24    3.78 
  -4 -25  -1   45.22    3.32 
  -4  25  -1   41.02    3.29 
  -5 -25  -1   -2.34    1.06 
  -5 -25  -1    1.54    1.45 
   5 -25   1    2.45    1.44 
  -5  25  -1   -1.45    1.22 
   6 -25   1   81.17    4.79 
  -6 -25  -1   88.26    4.98 
  -6  25  -1   67.64    4.56 
  -7 -25  -1    2.73    1.81 
   7 -25   1    3.88    1.77 
  -7  25  -1    3.76    1.93 
   8 -25   1   29.07    3.41 
  -8 -25  -1   40.18    3.97 
  -8  25  -1   32.66    3.73 
  -9 -25  -1   -1.77    1.64 
  -8 -26   1   33.73    3.86 
   8 -26  -1   32.20    3.52 
  -8  26   1   37.68    3.89 
  -7 -26   1   17.26    2.85 
   7 -26  -1   14.81    2.67 
  -7  26   1   12.32    2.53 
   6 -26  -1   10.14    2.36 
  -6 -26   1   12.15    2.33 
  -6  26   1   12.83    2.36 
   5 -26  -1    6.08    2.00 
   4 -26  -1   11.32    2.24 
  -4 -26   1   11.05    2.08 
   3 -26  -1    9.18    2.18 
  -3 -26   1    6.83    1.69 
  -2 -26   1   25.41    2.73 
   2 -26  -1   25.35    2.98 
   1 -26  -1   35.89    3.31 
  -1 -26   1   30.19    3.01 
   0 -26   1   40.25    3.19 
   0 -26  -1   40.87    3.22 
   1 -26   1   35.62    3.22 
  -1 -26  -1   34.80    3.19 
  -2 -26  -1   24.37    2.81 
   2 -26   1   21.00    2.79 
  -3 -26  -1   23.09    2.76 
   3 -26   1   27.60    3.04 
  -4 -26  -1    8.54    2.03 
   4 -26   1    8.26    2.01 
  -4  26  -1    7.59    1.94 
   5 -26   1    2.21    1.64 
  -5 -26  -1    1.09    1.35 
  -5  26  -1    0.57    1.53 
   6 -26   1    0.91    1.49 
  -6 -26  -1    1.47    1.60 
  -7 -26  -1    6.31    1.99 
   7 -26   1    6.50    2.01 
  -7  26  -1    4.68    2.01 
  -8 -26  -1   10.98    2.54 
   8 -26   1    9.26    2.37 
  -8  26  -1    7.89    2.44 
   7 -27  -1   20.22    3.04 
  -7 -27   1   22.50    3.25 
  -7  27   1   28.36    3.39 
   6 -27  -1    4.48    1.79 
   5 -27  -1   50.30    4.15 
  -4 -27   1    2.17    1.50 
   4 -27  -1    1.63    1.60 
   3 -27  -1   40.38    3.61 
  -3 -27   1   40.16    3.37 
   2 -27  -1    1.37    1.43 
  -2 -27   1    0.43    1.39 
  -1 -27   1   26.66    2.91 
   1 -27  -1   20.32    2.84 
   0 -27   1    1.10    1.41 
   0 -27  -1    1.10    1.31 
  -1 -27  -1    1.15    1.50 
   1 -27   1    0.93    1.41 
  -2 -27  -1    3.82    1.60 
   2 -27   1    1.57    1.47 
  -3 -27  -1   11.39    2.29 
   3 -27   1    9.41    2.25 
   4 -27   1    1.29    1.47 
  -4 -27  -1    2.65    1.64 
   5 -27   1   47.29    3.99 
  -5  27  -1   50.00    3.80 
   6 -27   1    1.38    1.57 
  -6  27  -1   -0.04    1.44 
  -7 -27  -1   40.32    3.93 
   7 -27   1   35.17    3.76 
  -7  27  -1   32.80    3.65 
   6 -28  -1    0.56    1.52 
   5 -28  -1    7.02    2.13 
   4 -28  -1   -0.43    1.48 
   3 -28  -1   12.67    2.52 
  -3 -28   1   14.78    2.52 
   2 -28  -1    3.62    1.78 
  -2 -28   1    3.64    1.71 
  -1 -28   1   49.68    3.71 
   1 -28  -1   50.30    3.99 
   0 -28   1   10.78    2.38 
   0 -28  -1   10.59    2.28 
  -1 -28  -1   49.13    3.78 
   1 -28   1   46.96    3.68 
   2 -28   1    8.89    2.22 
  -2 -28  -1    6.06    1.98 
  -3 -28  -1   29.35    3.25 
   3 -28   1   34.03    3.56 
  -4 -28  -1    1.94    1.62 
   4 -28   1   -1.18    1.40 
   5 -28   1    3.58    1.72 
   6 -28   1    2.38    1.87 
  -6  28  -1   -0.15    1.45 
   5 -29  -1   17.31    2.98 
   4 -29  -1   28.00    3.45 
  -3 -29   1   17.79    2.72 
   3 -29  -1   14.47    2.75 
  -2 -29   1   25.76    3.18 
   2 -29  -1   31.40    3.56 
   1 -29  -1    8.60    2.20 
  -1 -29   1    3.68    1.79 
   0 -29  -1    3.92    1.71 
   0 -29   1    2.91    1.71 
   1 -29   1    1.85    1.60 
  -1 -29  -1   -1.33    1.29 
  -2 -29  -1   13.13    2.50 
   2 -29   1   12.48    2.55 
  -3 -29  -1    6.87    2.23 
   3 -29   1    8.55    2.32 
  -4 -29  -1   28.57    3.21 
   4 -29   1   33.77    3.67 
   5 -29   1   25.73    3.35 
   4 -30  -1    0.25    1.74 
  -3 -30   1    0.29    1.67 
   3 -30  -1    1.22    1.73 
   2 -30  -1   24.27    3.28 
  -2 -30   1   23.64    3.21 
  -1 -30   1   -3.48    1.36 
   1 -30  -1   -0.37    1.57 
   0 -30  -1   59.26    4.32 
   0 -30   1   60.37    4.30 
   1 -30   1    7.09    2.15 
  -1 -30  -1    2.95    1.99 
  -2 -30  -1   66.38    4.55 
   2 -30   1   58.43    4.41 
  -3 -30  -1    0.43    1.63 
   3 -30   1    2.50    1.97 
   4 -30   1    9.89    2.54 
  -4 -30  -1    8.31    2.30 
  -1 -31   1    4.83    2.05 
   1 -31  -1    2.73    1.73 
   0 -31   1   10.72    2.55 
   0 -31  -1   15.30    2.83 
   1 -31   1    0.30    1.37 
  -1 -31  -1    1.64    1.84 
 -15   0   2   -0.40    1.40 
 -14   0   2    0.06    1.35 
 -13   0   2   -0.89    1.18 
 -12   0   2   43.99    3.18 
 -11   0   2   -0.59    0.87 
 -10   0   2   68.91    3.53 
 -10   0   2   74.85    3.70 
  -9   0   2    0.64    0.84 
  -9   0   2    0.14    0.73 
  -8   0   2  114.09    4.22 
  -8   0   2  111.48    4.18 
  -7   0   2   -0.20    0.59 
  -7   0   2    0.56    0.58 
  -6   0   2   94.13    3.34 
  -6   0   2   91.51    3.32 
  -5   0   2   -0.13    0.38 
  -4   0   2   28.07    1.44 
  -3   0   2   -0.71    0.24 
  -1   0   2    0.29    0.18 
   0   0  -2  575.48   12.08 
  -1   0  -2   -0.52    0.14 
  -2   0  -2  341.92    7.79 
  -2   0  -2  352.79    7.68 
  -3   0  -2   -0.27    0.30 
  -3   0  -2    0.07    0.31 
  -4   0  -2  450.76   10.29 
  -4   0  -2  461.50   10.55 
  -5   0  -2    0.16    0.50 
  -5   0  -2   -0.35    0.37 
  -6   0  -2   -0.04    0.50 
  -6   0  -2    0.69    0.69 
  -7   0  -2    0.91    0.71 
  -7   0  -2    0.16    0.51 
  -8   0  -2   34.02    2.10 
  -8   0  -2   32.16    2.33 
  -9   0  -2    0.03    0.70 
  -9   0  -2    0.48    0.88 
 -10   0  -2   95.94    4.41 
 -10   0  -2   86.32    3.93 
 -11   0  -2    0.04    0.90 
 -11   0  -2   -0.71    1.13 
 -12   0  -2   39.61    3.33 
 -13   0  -2    0.32    1.15 
 -15   1   2    2.53    1.62 
 -14  -1   2   45.50    3.47 
 -14   1   2   47.63    3.61 
 -13  -1   2   21.68    2.58 
 -13  -1   2   18.37    2.59 
 -13   1   2   19.50    2.59 
 -12  -1   2   40.79    3.20 
 -12  -1   2   37.15    2.91 
 -12   1   2   39.73    3.10 
 -11  -1   2    8.89    1.66 
 -11  -1   2    5.27    1.48 
 -11   1   2    7.31    1.59 
 -10  -1   2   17.97    2.06 
 -10  -1   2   14.48    1.87 
 -10   1   2   20.28    2.10 
  -9  -1   2    4.51    1.22 
  -9  -1   2    4.50    1.15 
  -9   1   2    6.62    1.33 
  -8  -1   2    0.52    0.71 
  -8  -1   2    0.95    0.78 
  -8   1   2    0.45    0.69 
  -7  -1   2   26.01    1.82 
  -7  -1   2   27.86    1.84 
  -7   1   2   25.31    1.84 
  -6  -1   2   22.17    1.61 
  -6  -1   2   22.46    1.51 
  -6   1   2   20.98    1.56 
  -5  -1   2   18.90    1.28 
  -5  -1   2   19.00    1.36 
  -5   1   2   17.17    1.30 
  -4  -1   2  155.20    4.30 
  -4  -1   2  151.76    4.24 
  -4   1   2  155.08    4.30 
  -3  -1   2  177.28    4.54 
  -3  -1   2  178.00    4.50 
  -3   1   2  170.63    4.50 
  -2  -1   2  119.92    3.12 
  -2   1   2  115.58    3.10 
  -1  -1   2  128.67    3.16 
  -1   1   2  132.56    3.17 
   0   1  -2  129.81    3.03 
  -1  -1  -2    0.78    0.17 
  -1   1  -2    1.19    0.26 
  -2  -1  -2    1.97    0.44 
  -2  -1  -2    3.01    0.36 
  -2   1  -2    3.49    0.46 
  -3  -1  -2    1.02    0.34 
  -3  -1  -2    0.83    0.45 
  -3   1  -2    1.27    0.41 
  -4  -1  -2  204.17    5.01 
  -4  -1  -2  200.50    5.42 
  -4   1  -2  197.02    5.18 
  -5  -1  -2  100.00    3.47 
  -5  -1  -2   94.61    3.04 
  -5   1  -2   96.24    3.19 
  -6  -1  -2  211.24    5.82 
  -6  -1  -2  216.15    6.33 
  -6   1  -2  227.66    6.08 
  -7  -1  -2   45.21    2.19 
  -7  -1  -2   42.58    2.46 
  -7   1  -2   42.08    2.25 
  -8  -1  -2   74.26    3.07 
  -8  -1  -2   67.85    3.41 
  -8   1  -2   67.98    3.10 
  -9  -1  -2   29.69    2.05 
  -9  -1  -2   30.57    2.48 
  -9   1  -2   28.13    2.11 
 -10  -1  -2   12.85    1.65 
 -10  -1  -2    8.33    1.74 
 -10   1  -2   10.91    1.65 
 -11  -1  -2    8.25    1.55 
 -11  -1  -2    4.70    1.65 
 -11   1  -2    6.21    1.46 
 -12  -1  -2    1.54    1.23 
 -12  -1  -2    0.31    1.06 
 -12   1  -2    1.83    1.22 
 -13  -1  -2    5.41    1.83 
 -13   1  -2    3.68    1.53 
 -15   2   2    9.30    2.21 
 -14  -2   2    1.03    1.37 
 -14   2   2   -1.16    1.12 
 -13  -2   2    1.69    1.52 
 -13  -2   2    1.79    1.37 
 -13   2   2    5.08    1.62 
 -12  -2   2    9.05    2.06 
 -12  -2   2   13.89    2.05 
 -12   2   2   16.54    2.30 
 -11  -2   2   22.11    2.23 
 -11  -2   2   22.11    2.48 
 -11   2   2   20.66    2.33 
 -10  -2   2    8.24    1.64 
 -10  -2   2    9.01    1.54 
 -10   2   2    9.74    1.70 
 -10   2   2    6.91    1.44 
  -9  -2   2   94.03    3.92 
  -9  -2   2   94.11    4.15 
  -9   2   2   95.61    3.86 
  -9   2   2   98.63    4.19 
  -8  -2   2   11.79    1.43 
  -8  -2   2   12.91    1.64 
  -8   2   2   13.91    1.60 
  -8   2   2   16.00    1.53 
  -7  -2   2   91.88    3.45 
  -7  -2   2   94.09    3.67 
  -7   2   2   89.00    3.34 
  -7   2   2   93.53    3.61 
  -6  -2   2   15.64    1.32 
  -6  -2   2   14.04    1.41 
  -6   2   2   15.90    1.41 
  -6   2   2   15.70    1.25 
  -5  -2   2   81.38    3.00 
  -5  -2   2   78.77    2.81 
  -5   2   2   79.25    2.94 
  -5   2   2   84.14    2.75 
  -4  -2   2    6.27    0.76 
   4  -2  -2    7.67    0.58 
  -4  -2   2    7.87    0.89 
  -4   2   2    8.14    0.75 
  -4   2   2    7.50    0.89 
  -3  -2   2    3.25    0.62 
  -3  -2   2    3.09    0.52 
  -3   2   2    3.28    0.57 
  -3   2   2    4.06    0.50 
  -2  -2   2    0.79    0.34 
  -2  -2   2    1.04    0.35 
  -2   2   2    0.47    0.30 
   0   2   2   41.15    1.12 
  -1  -2  -2   71.54    1.69 
  -1   2  -2   72.32    2.02 
  -2  -2  -2  387.91    8.40 
  -2  -2  -2  396.97    8.89 
  -2   2  -2  395.25    8.81 
  -3  -2  -2   47.55    1.47 
  -3  -2  -2   44.44    1.86 
  -3   2  -2   39.82    1.67 
  -4  -2  -2   63.61    2.48 
  -4  -2  -2   61.81    2.03 
  -4   2  -2   61.38    2.32 
  -5  -2  -2   99.81    3.55 
  -5  -2  -2  100.58    3.05 
  -5   2  -2   97.42    3.30 
  -6  -2  -2    9.76    1.30 
  -6  -2  -2    9.54    0.98 
  -6   2  -2    9.51    1.14 
  -7  -2  -2    4.65    1.10 
  -7  -2  -2    6.05    0.95 
  -7   2  -2    6.28    1.08 
  -8  -2  -2    0.62    0.66 
  -8  -2  -2   -0.45    0.78 
  -8   2  -2    1.37    0.82 
  -9  -2  -2   38.42    2.80 
  -9  -2  -2   38.87    2.31 
  -9   2  -2   34.90    2.35 
 -10  -2  -2    6.42    1.65 
 -10  -2  -2    9.18    1.47 
 -10   2  -2   11.44    1.70 
 -11  -2  -2   29.66    2.95 
 -11  -2  -2   30.65    2.41 
 -11   2  -2   36.24    2.77 
 -12  -2  -2    6.98    1.57 
 -12  -2  -2    9.17    2.07 
 -12   2  -2   11.43    1.96 
 -13  -2  -2   38.37    3.63 
 -13   2  -2   48.41    3.38 
 -14   2  -2    6.10    1.88 
 -15   3   2   29.03    3.42 
 -14  -3   2   -0.60    1.46 
 -14   3   2    1.02    1.37 
 -13  -3   2   52.64    3.47 
 -13  -3   2   48.83    3.72 
 -13   3   2   47.58    3.55 
 -12  -3   2    1.56    1.44 
 -12  -3   2    3.64    1.34 
 -12   3   2    1.04    1.20 
 -11  -3   2   58.18    3.32 
 -11  -3   2   59.26    3.74 
 -11   3   2   64.18    3.66 
 -10  -3   2    5.63    1.31 
 -10  -3   2    5.03    1.45 
 -10   3   2    5.00    1.21 
 -10   3   2    3.91    1.26 
  -9  -3   2    3.79    1.20 
  -9  -3   2    3.16    1.01 
  -9   3   2    2.75    0.97 
  -9   3   2    5.74    1.31 
  -8  -3   2    7.29    1.22 
  -8  -3   2    7.25    1.38 
  -8   3   2    5.47    1.06 
  -8   3   2    5.51    1.15 
  -7  -3   2   49.14    2.35 
  -7  -3   2   45.58    2.53 
  -7   3   2   46.46    2.53 
  -7   3   2   47.64    2.22 
  -6  -3   2    3.19    0.76 
  -6  -3   2    3.42    0.90 
  -6   3   2    4.63    0.80 
  -6   3   2    4.03    0.89 
  -5  -3   2  194.10    5.17 
  -5  -3   2  189.24    5.42 
   5  -3  -2  182.43    4.52 
  -5   3   2  181.73    5.30 
  -5   3   2  189.11    4.88 
   4  -3  -2   88.98    2.48 
  -4  -3   2   89.98    2.83 
  -4  -3   2   89.05    3.05 
  -4   3   2   86.25    2.58 
  -4   3   2   89.66    2.98 
  -3  -3   2  265.65    6.42 
   3  -3  -2  251.73    5.70 
  -3  -3   2  253.40    6.13 
  -2  -3   2    7.70    0.63 
  -2  -3   2    6.19    0.69 
   2  -3  -2    7.93    0.58 
  -1  -3   2  400.44    8.84 
   1   3  -2  408.22    8.78 
   0   3  -2   14.99    0.75 
   0   3   2   15.11    0.58 
  -1  -3  -2   37.47    1.38 
  -1   3  -2   37.08    1.36 
  -2  -3  -2   11.51    0.49 
  -2  -3  -2   13.58    0.94 
  -2   3  -2   12.54    0.90 
  -3  -3  -2   43.00    1.35 
  -3  -3  -2   41.97    1.85 
  -3   3  -2   41.82    1.77 
  -3   3  -2   43.32    1.55 
  -4  -3  -2    4.55    0.53 
  -4  -3  -2    3.39    0.73 
  -4   3  -2    5.34    0.79 
  -4   3  -2    4.89    0.68 
  -5  -3  -2  187.26    4.80 
  -5  -3  -2  183.77    5.52 
  -5   3  -2  189.90    5.35 
  -5   3  -2  188.84    5.10 
  -6  -3  -2   -0.32    0.52 
  -6  -3  -2    0.43    0.45 
  -6   3  -2    0.23    0.50 
  -6   3  -2    0.49    0.56 
  -7  -3  -2  118.86    3.80 
  -7  -3  -2  123.77    4.56 
  -7   3  -2  114.07    4.16 
  -7   3  -2  108.17    3.95 
  -8  -3  -2   19.11    1.53 
  -8  -3  -2   22.78    2.16 
  -8   3  -2   19.72    1.81 
  -8   3  -2   20.21    1.84 
  -9  -3  -2   92.69    3.72 
  -9  -3  -2  102.20    4.55 
  -9   3  -2   99.35    4.18 
  -9   3  -2  102.87    4.16 
 -10  -3  -2    3.11    1.06 
 -10  -3  -2    3.04    1.32 
 -10   3  -2    1.42    1.09 
 -10   3  -2    2.78    1.10 
 -11  -3  -2    9.02    1.52 
 -11  -3  -2    8.02    1.96 
 -11   3  -2    8.10    1.58 
 -12  -3  -2    2.17    1.64 
 -12   3  -2    0.83    1.13 
 -13  -3  -2    9.25    2.35 
 -13   3  -2   13.09    2.22 
 -14  -3  -2    1.55    1.79 
 -14   3  -2    1.59    1.54 
 -15   4   2    7.75    2.31 
 -14  -4   2    1.81    1.59 
 -14   4   2    0.53    1.48 
 -13  -4   2    0.83    1.21 
 -13  -4   2    1.13    1.61 
 -13   4   2    4.77    1.66 
 -12  -4   2    6.38    1.85 
 -12  -4   2    1.66    1.15 
 -12   4   2    2.56    1.33 
 -11  -4   2   12.26    2.15 
 -11  -4   2   14.16    1.86 
 -11   4   2   11.93    2.01 
 -10  -4   2   42.10    3.06 
 -10  -4   2   52.33    2.90 
 -10   4   2   43.23    3.00 
  -9  -4   2   70.15    3.69 
  -9  -4   2   69.85    3.25 
  -9   4   2   78.07    3.19 
  -9   4   2   65.69    3.45 
  -8  -4   2   93.90    4.04 
  -8  -4   2   89.17    3.57 
  -8   4   2   97.68    4.02 
  -8   4   2   90.69    3.39 
  -7  -4   2   51.08    2.72 
  -7  -4   2   52.62    2.45 
  -7   4   2   46.59    2.58 
  -7   4   2   52.35    2.27 
  -6  -4   2   35.22    1.84 
  -6  -4   2   30.91    2.00 
  -6   4   2   31.03    1.96 
  -6   4   2   33.23    1.64 
  -5  -4   2   34.66    1.95 
  -5  -4   2   31.50    1.65 
   5  -4  -2   33.75    1.46 
  -5   4   2   34.34    1.86 
  -5   4   2   37.20    1.55 
   4  -4  -2    1.36    0.40 
  -4  -4   2    0.66    0.48 
  -4  -4   2    0.94    0.43 
  -4   4   2    0.83    0.48 
  -4   4   2    1.57    0.39 
  -3  -4   2    2.21    0.48 
   3  -4  -2    2.14    0.42 
  -3  -4   2    1.76    0.52 
  -3   4   2    1.52    0.46 
   2  -4  -2   12.57    0.78 
  -2  -4   2   14.38    0.96 
  -2   4   2   12.34    0.83 
   1  -4  -2    3.93    0.46 
  -1  -4   2    3.59    0.49 
   1   4  -2    3.82    0.44 
   0  -4   2   20.31    0.88 
   0   4  -2   20.78    0.95 
   0   4   2   19.70    0.72 
  -1  -4  -2   27.77    1.21 
   1  -4   2   26.49    1.11 
  -1   4  -2   26.04    1.17 
  -2  -4  -2    8.84    0.37 
  -2  -4  -2    8.57    0.82 
  -2   4  -2    8.10    0.76 
  -3  -4  -2  121.50    2.96 
  -3  -4  -2  123.26    3.75 
  -3   4  -2  121.31    3.63 
  -3   4  -2  129.24    3.24 
  -4  -4  -2   16.25    0.87 
  -4  -4  -2   15.63    1.33 
  -4   4  -2   18.58    1.08 
  -4   4  -2   16.05    1.20 
  -5  -4  -2   11.36    0.88 
  -5  -4  -2   10.54    1.28 
  -5   4  -2   13.25    1.26 
  -5   4  -2   13.63    1.09 
  -6  -4  -2    0.73    0.73 
  -6  -4  -2    0.46    0.46 
  -6   4  -2    0.93    0.59 
  -6   4  -2    0.13    0.51 
  -7  -4  -2    3.86    1.04 
  -7  -4  -2    5.70    0.88 
  -7   4  -2    5.29    0.97 
  -7   4  -2    5.10    1.04 
  -8  -4  -2   15.34    1.93 
  -8  -4  -2   11.97    1.30 
  -8   4  -2   11.68    1.56 
  -8   4  -2   11.52    1.43 
  -9  -4  -2   55.20    3.40 
  -9  -4  -2   54.24    2.68 
  -9   4  -2   57.19    3.12 
  -9   4  -2   60.97    3.06 
 -10  -4  -2   36.77    2.96 
 -10  -4  -2   32.44    2.24 
 -10   4  -2   36.06    2.66 
 -11  -4  -2   49.61    3.59 
 -11   4  -2   45.12    3.06 
 -12  -4  -2   53.79    3.89 
 -12   4  -2   60.79    3.73 
 -13  -4  -2   33.76    3.56 
 -13   4  -2   31.28    3.06 
 -14  -4  -2   15.71    2.91 
 -14   4  -2   14.34    2.53 
 -15  -4  -2   10.23    2.59 
 -15   4  -2   10.20    2.41 
 -15  -5   2   -1.28    1.72 
 -15   5   2    1.94    1.74 
 -14  -5   2   47.42    4.29 
 -14   5   2   45.51    3.95 
 -13  -5   2    5.62    2.06 
 -13   5   2    6.37    1.89 
 -12  -5   2   48.59    3.13 
 -12  -5   2   54.23    3.95 
 -12   5   2   45.00    3.41 
 -11  -5   2    4.52    1.64 
 -11  -5   2    3.90    1.23 
 -11   5   2    4.42    1.39 
 -10  -5   2   27.51    2.18 
 -10  -5   2   30.30    2.77 
 -10   5   2   32.08    2.71 
  -9  -5   2    1.03    0.96 
  -9  -5   2   -0.60    0.66 
  -9   5   2   -1.67    0.73 
  -8  -5   2    1.63    0.94 
  -8  -5   2    2.79    0.88 
  -8   5   2    3.31    1.10 
  -8   5   2    2.11    0.76 
  -7  -5   2    1.61    0.70 
  -7  -5   2    2.39    0.88 
  -7   5   2    2.87    0.91 
  -7   5   2    2.35    0.69 
  -6  -5   2  122.02    3.88 
  -6  -5   2  116.26    4.30 
   6  -5  -2  123.01    3.54 
  -6   5   2  117.73    4.18 
  -6   5   2  126.60    3.57 
  -5  -5   2   11.10    1.31 
  -5  -5   2   11.77    1.05 
   5  -5  -2   11.58    0.93 
  -5   5   2   12.32    0.87 
  -5   5   2   12.40    1.26 
  -4  -5   2  312.16    7.99 
   4  -5  -2  319.12    7.24 
  -4  -5   2  315.69    7.55 
  -4   5   2  313.15    7.88 
  -3  -5   2   18.51    1.26 
  -3  -5   2   20.90    1.11 
   3  -5  -2   18.86    1.06 
  -3   5   2   16.84    1.17 
   2  -5  -2  327.92    7.38 
  -2  -5   2  338.83    7.85 
  -2   5   2  327.64    7.69 
   1  -5  -2    1.82    0.42 
  -1  -5   2    1.56    0.41 
   0  -5  -2   32.69    1.27 
   0  -5   2   30.31    1.20 
   0  -5   2   30.29    1.15 
   0   5  -2   32.71    1.30 
   0   5   2   30.95    1.03 
  -1  -5  -2    1.32    0.42 
   1  -5   2    1.22    0.39 
   1   5   2    0.73    0.15 
  -1   5  -2    0.92    0.38 
  -2  -5  -2    3.07    0.61 
   2  -5   2    2.28    0.49 
  -2   5  -2    3.21    0.60 
  -3  -5  -2    2.97    0.32 
  -3  -5  -2    2.39    0.64 
  -3   5  -2    1.74    0.53 
  -4  -5  -2  102.28    3.60 
  -4  -5  -2  106.62    2.78 
  -4   5  -2  104.54    3.49 
  -4   5  -2  104.78    2.99 
  -5  -5  -2   -0.61    0.53 
  -5  -5  -2    0.76    0.38 
  -5   5  -2    1.61    0.67 
  -5   5  -2    0.39    0.55 
  -6  -5  -2  139.26    4.00 
  -6  -5  -2  141.75    5.00 
  -6   5  -2  148.91    4.32 
  -6   5  -2  146.30    4.78 
  -7  -5  -2    2.86    0.71 
  -7  -5  -2    2.17    0.92 
  -7   5  -2    4.17    0.89 
  -7   5  -2    2.33    0.84 
  -8  -5  -2  147.92    5.62 
  -8  -5  -2  146.79    4.60 
  -8   5  -2  145.46    5.26 
  -8   5  -2  162.31    4.96 
  -9  -5  -2    3.72    0.98 
  -9  -5  -2    1.34    1.18 
  -9   5  -2    2.26    1.03 
  -9   5  -2    1.71    1.00 
 -10  -5  -2   45.66    2.57 
 -10  -5  -2   38.38    3.00 
 -10   5  -2   42.85    2.88 
 -11  -5  -2    2.27    1.36 
 -11   5  -2    3.69    1.41 
 -12  -5  -2    1.09    1.39 
 -12   5  -2    1.66    1.33 
 -13  -5  -2   -0.06    1.63 
 -13   5  -2   -1.05    1.24 
 -14  -5  -2   34.30    3.83 
 -14   5  -2   28.48    3.21 
 -15  -5  -2    1.37    2.05 
 -15   5  -2    2.25    1.64 
 -14  -6   2    5.37    2.18 
 -14   6   2    9.83    2.34 
 -13  -6   2   -0.21    1.49 
 -13   6   2    1.35    1.38 
 -12  -6   2    6.49    1.82 
 -12   6   2   10.50    2.14 
 -11  -6   2    4.71    1.28 
 -11  -6   2    5.41    1.67 
 -11   6   2    6.61    1.63 
 -10  -6   2   93.05    3.99 
 -10  -6   2  109.90    4.95 
 -10   6   2   95.92    4.57 
  -9  -6   2   11.70    1.49 
  -9  -6   2   10.85    1.80 
  -9   6   2    8.30    1.64 
  -8  -6   2  197.97    6.70 
  -8  -6   2  202.42    6.00 
  -8   6   2  203.00    6.58 
  -7  -6   2   12.40    1.28 
  -7  -6   2   10.49    1.54 
  -7   6   2   10.61    1.02 
  -7   6   2   10.53    1.44 
  -6  -6   2  122.90    4.54 
  -6  -6   2  131.59    4.08 
   6  -6  -2  130.23    3.80 
  -6   6   2  134.43    4.57 
  -6   6   2  129.12    3.59 
  -5  -6   2    4.97    0.80 
  -5  -6   2    5.51    0.51 
   5  -6  -2    5.17    0.76 
  -5  -6   2    5.77    1.06 
  -5   6   2    5.53    0.57 
  -5   6   2    3.89    0.87 
  -4  -6   2    6.72    0.54 
   4  -6  -2    5.29    0.73 
  -4  -6   2    5.81    0.75 
  -4  -6   2    4.62    0.88 
  -4   6   2    5.80    0.92 
  -3  -6   2    4.89    0.48 
   3  -6  -2    5.74    0.70 
  -3  -6   2    3.34    0.69 
  -3   6   2    4.68    0.76 
  -2  -6   2  170.77    4.58 
   2  -6  -2  168.40    4.28 
  -2  -6   2  170.60    3.98 
  -2   6   2  160.63    4.39 
  -1  -6   2   79.51    2.46 
   1  -6  -2   76.30    2.37 
   0  -6   2  439.41    9.67 
   0  -6  -2  442.24    9.67 
   0  -6   2  439.97    9.60 
   0   6   2  453.23    9.57 
   0   6  -2  447.72    9.92 
  -1  -6  -2    4.89    0.63 
   1  -6   2    4.62    0.61 
  -1   6  -2    4.86    0.66 
   1   6   2    4.80    0.35 
  -2  -6  -2  300.17    7.31 
   2  -6   2  305.16    7.02 
  -2   6  -2  295.64    7.32 
   3  -6   2   86.45    2.81 
  -3  -6  -2   90.15    3.14 
  -3  -6  -2   89.88    2.18 
  -3   6  -2   90.80    3.11 
  -4  -6  -2  238.89    6.62 
  -4  -6  -2  238.88    5.47 
  -4   6  -2  257.05    5.74 
  -4   6  -2  220.27    6.35 
  -5  -6  -2    2.60    0.50 
  -5  -6  -2    2.75    0.87 
  -5   6  -2    3.15    0.65 
  -5   6  -2    3.39    0.82 
  -6  -6  -2   11.50    1.52 
  -6  -6  -2   14.03    1.04 
  -6   6  -2   14.16    1.15 
  -6   6  -2   13.62    1.49 
  -7  -6  -2    0.74    0.81 
  -7  -6  -2    1.19    0.59 
  -7   6  -2    0.30    0.65 
  -7   6  -2    0.67    0.61 
  -8  -6  -2    2.92    1.14 
  -8  -6  -2    5.05    0.90 
  -8   6  -2    4.60    1.00 
  -8   6  -2    4.14    1.12 
  -9  -6  -2    0.44    0.71 
  -9  -6  -2    0.85    1.04 
  -9   6  -2   -0.49    0.86 
 -10  -6  -2   67.99    4.01 
 -10   6  -2   64.43    3.68 
 -11  -6  -2    3.60    1.53 
 -11   6  -2    2.43    1.31 
 -12  -6  -2   91.32    5.21 
 -12   6  -2   95.00    4.81 
 -13  -6  -2    2.51    1.95 
 -13   6  -2    6.43    1.89 
 -14  -6  -2   37.55    4.05 
 -14   6  -2   34.51    3.44 
 -14  -7   2   16.31    3.19 
 -14   7   2   20.76    2.95 
 -13  -7   2   40.59    3.90 
 -13   7   2   46.60    3.79 
 -12  -7   2   18.76    2.79 
 -12   7   2   21.33    2.71 
 -11  -7   2   14.14    1.81 
 -11  -7   2   13.36    2.23 
 -11   7   2   13.81    2.23 
 -10  -7   2   18.87    2.42 
 -10  -7   2   16.44    1.78 
 -10   7   2   17.15    2.23 
  -9  -7   2    2.39    0.92 
  -9  -7   2    2.08    1.13 
  -9   7   2    1.97    1.06 
  -8  -7   2    0.57    0.91 
  -8  -7   2   -0.96    0.55 
  -8   7   2    0.02    0.70 
   7  -7  -2    9.73    1.08 
  -7  -7   2    8.38    1.45 
  -7  -7   2    8.47    1.15 
  -7   7   2   11.53    1.53 
   6  -7  -2  107.41    3.41 
  -6  -7   2  104.41    2.77 
  -6  -7   2  101.51    4.09 
  -6  -7   2  105.51    3.51 
  -6   7   2  102.61    3.97 
  -6   7   2  104.89    2.94 
  -5  -7   2   96.83    3.18 
  -5  -7   2  100.51    2.65 
   5  -7  -2   97.93    3.17 
  -5  -7   2  101.47    3.79 
  -5   7   2   91.34    3.57 
  -4  -7   2   95.16    2.55 
  -4  -7   2   91.64    3.43 
  -4  -7   2   96.04    2.97 
   4  -7  -2   93.01    3.00 
  -4   7   2   94.83    3.38 
   3  -7  -2  136.41    3.87 
  -3  -7   2  140.18    4.26 
  -3  -7   2  140.83    3.48 
  -3   7   2  139.10    4.13 
  -2  -7   2   76.97    2.70 
   2  -7  -2   77.07    2.51 
  -2  -7   2   77.79    2.26 
  -2   7   2   73.45    2.51 
  -1  -7   2   75.05    2.47 
   0  -7   2    0.92    0.40 
   0  -7   2    0.89    0.33 
   0  -7  -2    0.13    0.35 
   0  -7  -2    0.29    0.29 
   0   7  -2    0.18    0.35 
   0   7   2    1.23    0.33 
  -1  -7  -2  101.60    3.05 
  -1  -7  -2   98.82    2.99 
   1  -7   2  108.02    3.08 
   1   7   2  103.55    2.50 
  -1   7  -2  104.53    3.16 
   2  -7   2    5.62    0.74 
  -2  -7  -2    6.70    0.84 
  -2   7  -2    5.62    0.79 
   2   7   2    6.46    0.36 
   3  -7   2   45.15    1.94 
  -3  -7  -2   49.18    2.23 
  -3   7  -2   48.49    2.17 
   3   7   2   45.56    1.27 
  -4  -7  -2   48.74    1.51 
   4  -7   2   46.59    2.07 
  -4   7  -2   50.83    1.70 
  -4   7  -2   46.43    2.26 
  -5  -7  -2   85.78    2.51 
  -5  -7  -2   77.95    3.42 
  -5   7  -2   87.34    3.41 
  -5   7  -2   93.76    2.73 
  -6  -7  -2   21.36    1.95 
  -6  -7  -2   24.10    1.26 
  -6   7  -2   24.13    1.39 
  -6   7  -2   22.15    1.78 
  -7  -7  -2   84.03    3.91 
  -7  -7  -2   85.37    2.90 
  -7   7  -2   89.87    3.10 
  -7   7  -2   87.31    3.75 
  -8  -7  -2   42.98    2.07 
  -8  -7  -2   44.53    3.02 
  -8   7  -2   38.26    2.58 
  -9  -7  -2   61.94    3.70 
  -9   7  -2   64.46    3.50 
 -10  -7  -2   22.71    2.67 
 -10   7  -2   19.76    2.30 
 -11  -7  -2    1.92    1.42 
 -11   7  -2    1.30    1.23 
 -12  -7  -2    0.60    1.35 
 -12   7  -2   -1.34    0.97 
 -13  -7  -2    1.98    1.59 
 -13   7  -2    3.58    1.61 
 -14  -7  -2   24.19    3.46 
 -14   7  -2   22.09    3.06 
 -14  -8   2   -0.06    1.73 
 -14   8   2   -1.77    1.14 
 -13  -8   2    2.22    1.72 
 -13   8   2    1.52    1.57 
 -12  -8   2   -0.30    1.30 
 -12   8   2    0.62    1.24 
 -11  -8   2   34.78    3.31 
 -11   8   2   34.57    3.17 
 -10  -8   2    0.68    1.03 
 -10  -8   2    0.42    0.84 
 -10   8   2    0.72    1.04 
  -9  -8   2   84.59    3.53 
  -9  -8   2   84.48    4.35 
  -9   8   2   83.19    4.15 
  -8  -8   2    5.97    1.09 
  -8  -8   2    5.60    1.39 
  -8   8   2    4.86    1.21 
   7  -8  -2   88.45    3.18 
  -7  -8   2   79.35    3.81 
  -7  -8   2   78.72    3.12 
  -7   8   2   82.81    3.71 
   6  -8  -2    3.41    0.78 
  -6  -8   2    4.85    0.85 
  -6  -8   2    4.59    0.59 
  -6  -8   2    2.92    0.94 
  -6   8   2    3.31    0.95 
  -5  -8   2   46.87    1.64 
  -5  -8   2   41.85    2.38 
   5  -8  -2   45.97    2.08 
  -5  -8   2   44.76    1.98 
  -5   8   2   43.70    2.34 
   4  -8  -2   12.71    1.11 
  -4  -8   2   14.27    1.40 
  -4  -8   2   17.06    0.96 
   4   8  -2   14.28    1.05 
  -4   8   2   13.11    1.30 
  -3  -8   2    1.60    0.46 
   3  -8  -2    1.96    0.61 
  -3  -8   2    2.23    0.71 
   3   8  -2    1.78    0.50 
  -3   8   2    2.45    0.65 
  -2  -8   2   15.82    1.00 
  -2  -8   2   15.04    1.19 
   2  -8  -2   15.66    1.15 
  -2   8   2   12.89    1.05 
  -1  -8   2  116.07    3.42 
   1  -8  -2  116.44    3.42 
   0  -8   2    1.08    0.45 
   0  -8   2    1.53    0.42 
   0  -8  -2    1.36    0.41 
   0  -8  -2    0.92    0.44 
   0   8   2    2.00    0.41 
   0   8  -2    1.24    0.46 
  -1  -8  -2  246.53    6.09 
   1  -8   2  247.96    6.05 
  -1  -8  -2  237.76    5.96 
   1   8   2  249.77    5.50 
  -1   8  -2  240.52    6.21 
   2  -8   2    0.06    0.38 
  -2  -8  -2    0.74    0.50 
  -2   8  -2    1.12    0.51 
   2   8   2    0.65    0.22 
  -3  -8  -2  153.27    4.71 
  -3   8  -2  150.00    4.65 
   3   8   2  158.15    3.51 
   4  -8   2    1.41    0.61 
  -4  -8  -2    1.57    0.76 
  -4   8  -2   -0.32    0.54 
   4   8   2    1.24    0.31 
  -5  -8  -2   50.51    2.69 
  -5  -8  -2   53.64    1.77 
  -5   8  -2   54.37    2.64 
  -5   8  -2   54.11    1.91 
  -6  -8  -2   20.13    1.16 
  -6  -8  -2   20.10    1.95 
  -6   8  -2   24.89    1.34 
  -6   8  -2   19.72    1.81 
  -7  -8  -2   10.74    1.74 
  -7  -8  -2   10.97    1.01 
  -7   8  -2   10.64    1.53 
  -8  -8  -2    0.84    0.99 
  -8   8  -2    1.21    0.88 
  -9  -8  -2   62.47    3.80 
  -9   8  -2   53.07    3.25 
 -10  -8  -2    4.14    1.61 
 -10   8  -2    3.44    1.33 
 -11  -8  -2   76.63    4.68 
 -11   8  -2   78.62    4.36 
 -12  -8  -2    5.01    1.72 
 -12   8  -2    4.44    1.60 
 -13  -8  -2   64.65    4.74 
 -13   8  -2   58.92    4.06 
 -14  -8  -2    1.86    1.90 
 -14   8  -2   -0.59    1.39 
 -14  -9   2   10.00    2.65 
 -14   9   2   12.73    2.66 
 -13  -9   2   55.13    4.45 
 -13   9   2   52.32    4.11 
 -12  -9   2    6.35    1.94 
 -12   9   2    3.57    1.66 
 -11  -9   2   24.90    3.00 
 -11   9   2   24.56    2.86 
 -10  -9   2    1.22    1.27 
 -10   9   2    0.36    1.00 
  -9  -9   2    4.13    1.43 
  -9  -9   2    7.74    1.28 
  -9   9   2    9.52    1.70 
  -8  -9   2    7.50    1.19 
  -8  -9   2    7.44    1.53 
  -8   9   2    5.87    1.44 
  -7  -9   2   31.52    1.87 
   7  -9  -2   34.29    1.97 
  -7  -9   2   32.15    2.42 
  -7   9   2   30.61    2.27 
   6  -9  -2    2.24    0.74 
  -6  -9   2    2.88    0.74 
  -6  -9   2    1.09    0.79 
  -6  -9   2    3.57    0.59 
  -6   9   2    1.82    0.82 
  -5  -9   2   73.92    3.34 
  -5  -9   2   76.46    2.37 
   5  -9  -2   75.52    2.87 
  -5   9   2   72.22    3.21 
   5   9  -2   75.91    2.68 
  -4  -9   2   94.94    3.64 
   4  -9  -2   89.47    3.19 
  -4  -9   2   98.43    2.84 
   4   9  -2   98.01    3.02 
  -4   9   2   95.75    3.53 
  -3  -9   2   77.24    3.00 
   3  -9  -2   75.20    2.75 
  -3  -9   2   73.91    2.38 
   3   9  -2   68.96    2.41 
  -3   9   2   75.48    2.83 
  -2  -9   2   67.38    2.64 
  -2   9   2   71.42    2.59 
   2   9  -2   72.42    2.39 
   1  -9  -2  269.26    6.67 
  -1  -9   2  265.41    6.68 
  -1  -9   2  281.01    6.56 
  -1   9   2  266.05    6.56 
   0  -9   2  120.50    3.35 
   0  -9  -2  118.55    3.54 
   0  -9  -2  119.89    3.33 
   0  -9   2  119.88    3.53 
   0   9  -2  116.43    3.54 
   0   9   2  124.65    3.27 
  -1  -9  -2   78.36    2.68 
   1  -9   2   78.28    2.27 
   1  -9   2   81.07    2.77 
  -1  -9  -2   78.94    2.71 
  -1   9  -2   74.84    2.75 
   1   9   2   84.12    2.24 
  -2  -9  -2   13.87    1.22 
   2  -9   2   14.65    1.17 
  -2  -9  -2   15.69    1.12 
  -2   9  -2   15.57    1.30 
   2   9   2   14.85    0.70 
  -3  -9  -2   27.30    1.71 
   3  -9   2   27.28    1.58 
  -3   9  -2   26.96    1.75 
   3   9   2   25.07    0.89 
   4  -9   2   51.17    2.29 
  -4  -9  -2   46.96    2.51 
  -4   9  -2   48.71    2.45 
   4   9   2   47.89    1.46 
  -5  -9  -2  126.06    3.32 
  -5  -9  -2  125.75    4.67 
   5  -9   2  130.60    4.24 
  -5   9  -2  130.58    4.58 
  -5   9  -2  133.29    3.43 
  -6  -9  -2   63.05    3.28 
  -6  -9  -2   65.94    2.17 
  -6   9  -2   59.23    3.04 
  -7  -9  -2  121.65    4.98 
  -7   9  -2  115.43    4.64 
  -8  -9  -2   16.70    2.22 
  -8   9  -2   15.91    1.95 
  -9  -9  -2   38.31    3.06 
  -9   9  -2   39.86    2.92 
 -10  -9  -2    0.87    1.35 
 -10   9  -2   -0.79    0.97 
 -11  -9  -2    1.74    1.42 
 -11   9  -2    0.63    1.19 
 -12  -9  -2    2.03    1.58 
 -12   9  -2    3.73    1.55 
 -13  -9  -2    4.84    2.07 
 -13   9  -2    5.55    1.81 
 -14  -9  -2    2.09    1.86 
 -14   9  -2    4.83    1.91 
 -14 -10   2   -0.44    1.68 
 -14  10   2   -0.74    1.52 
 -13 -10   2    1.73    1.75 
 -13  10   2    2.45    1.63 
 -12 -10   2   12.05    2.46 
 -12  10   2   14.47    2.49 
 -11 -10   2    3.01    1.69 
 -11  10   2    4.80    1.69 
 -10 -10   2   42.41    3.44 
 -10  10   2   40.93    3.13 
  -9 -10   2   11.59    2.08 
  -9 -10   2   13.05    1.50 
  -9  10   2   13.02    2.00 
  -8 -10   2   81.18    4.11 
  -8 -10   2   73.67    3.14 
   8 -10  -2   86.70    3.39 
  -8  10   2   75.87    3.93 
  -7 -10   2   37.50    2.04 
  -7 -10   2   36.65    2.62 
   7 -10  -2   35.57    2.10 
  -7  10   2   33.94    2.52 
   6 -10  -2   41.50    2.17 
  -6 -10   2   42.45    2.64 
   6  10  -2   41.47    2.00 
  -6  10   2   45.28    2.67 
  -5 -10   2    3.70    0.67 
   5 -10  -2    3.48    0.86 
  -5 -10   2    5.06    1.11 
  -5  10   2    5.17    1.07 
   5  10  -2    4.58    0.78 
   4 -10  -2   17.40    1.42 
  -4 -10   2   19.13    1.68 
  -4 -10   2   19.51    1.19 
  -4  10   2   17.73    1.59 
   4  10  -2   16.15    1.15 
  -3 -10   2    1.12    0.68 
  -3 -10   2    1.24    0.51 
   3 -10  -2    2.21    0.66 
  -3  10   2    0.60    0.60 
   3  10  -2    0.54    0.43 
   2 -10  -2    5.99    0.91 
  -2 -10   2    6.74    0.95 
   2  10  -2    7.53    0.81 
   1 -10  -2  127.94    3.31 
   1 -10  -2  123.87    3.86 
  -1 -10   2  129.89    3.85 
  -1 -10   2  130.52    3.77 
  -1  10   2  126.57    3.70 
   0 -10  -2  178.69    4.97 
   0 -10  -2  184.95    4.72 
   0 -10   2  190.40    4.76 
   0 -10   2  175.05    4.90 
   0  10   2  186.76    4.67 
   1 -10   2   40.91    1.49 
  -1 -10  -2   41.61    1.85 
   1 -10   2   39.11    1.88 
  -1 -10  -2   38.94    1.86 
  -1  10  -2   35.63    1.88 
   1  10   2   40.30    1.45 
   2 -10   2  139.48    4.29 
  -2 -10  -2  145.24    4.18 
  -2 -10  -2  143.49    4.38 
  -2  10  -2  139.94    4.44 
   2  10   2  147.78    3.48 
   3 -10   2   17.54    1.41 
  -3 -10  -2   12.94    1.39 
  -3 -10  -2   12.94    1.15 
   3  10   2   15.29    0.71 
  -3  10  -2   12.31    1.37 
   4 -10   2  163.12    4.96 
  -4 -10  -2  159.66    5.29 
   4  10   2  171.18    3.92 
  -4  10  -2  170.02    5.35 
   5 -10   2    1.05    0.62 
  -5 -10  -2    0.33    0.67 
  -5  10  -2    1.04    0.71 
   5  10   2    0.75    0.37 
  -6 -10  -2    2.12    0.93 
  -6 -10  -2    1.48    0.50 
  -6  10  -2    4.33    1.11 
  -7 -10  -2    0.48    0.93 
  -7  10  -2    1.35    0.89 
  -8 -10  -2   13.04    2.04 
  -8  10  -2   14.51    1.92 
  -9 -10  -2    9.43    1.92 
  -9  10  -2    8.83    1.70 
 -10 -10  -2   31.57    3.18 
 -10  10  -2   30.27    2.86 
 -11 -10  -2   30.75    3.46 
 -11  10  -2   40.51    3.39 
 -12 -10  -2   33.07    3.61 
 -12  10  -2   33.86    3.34 
 -13 -10  -2    3.17    1.79 
 -13  10  -2    7.20    2.05 
 -14 -10  -2   20.77    3.54 
 -14  10  -2   21.00    3.16 
 -14 -11   2   52.53    4.92 
 -13 -11   2    2.92    1.81 
 -13  11   2    2.00    1.73 
 -12 -11   2   49.21    4.00 
 -12  11   2   44.49    3.68 
 -11 -11   2   -2.22    1.13 
 -11  11   2    0.89    1.21 
 -10 -11   2   31.87    3.19 
 -10  11   2   35.11    3.14 
  -9 -11   2    2.17    1.32 
  -9  11   2    1.81    1.28 
  -8 -11   2    5.45    1.43 
  -8 -11   2    7.25    1.15 
   8 -11  -2    7.88    1.32 
  -8  11   2    7.86    1.61 
  -7 -11   2    0.27    0.80 
   7 -11  -2    1.99    0.83 
  -7  11   2    0.38    0.96 
   7  11  -2    0.46    0.69 
  -6 -11   2   49.17    2.88 
   6 -11  -2   47.78    2.45 
   6  11  -2   43.32    2.10 
  -6  11   2   50.03    2.90 
  -5 -11   2    4.29    0.74 
  -5 -11   2    5.07    1.11 
   5 -11  -2    4.28    0.92 
  -5  11   2    4.10    1.03 
   5  11  -2    5.74    0.84 
   4 -11  -2   67.50    2.77 
  -4 -11   2   69.27    2.42 
  -4 -11   2   62.48    2.97 
  -4  11   2   63.86    2.92 
   4  11  -2   65.39    2.40 
  -3 -11   2    8.06    1.19 
   3 -11  -2    8.19    1.10 
  -3 -11   2    8.07    0.92 
   3  11  -2    9.02    0.93 
  -3  11   2    8.45    1.14 
   2 -11  -2  113.13    3.74 
  -2 -11   2  111.96    3.79 
   2  11  -2  114.02    3.45 
  -1 -11   2    7.00    0.90 
   1 -11  -2    6.66    0.65 
   1 -11  -2    6.12    0.93 
  -1 -11   2    6.72    0.92 
  -1  11   2    5.73    0.82 
   0 -11  -2   65.66    2.60 
   0 -11   2   68.74    2.62 
   0 -11  -2   67.62    2.33 
   0 -11   2   69.07    2.37 
   0  11   2   65.36    2.28 
   1 -11   2   -0.24    0.30 
  -1 -11  -2    0.02    0.42 
  -1 -11  -2   -0.18    0.44 
   1 -11   2    0.31    0.48 
   1  11   2   -0.48    0.34 
  -1  11  -2    0.34    0.57 
   2 -11   2   10.41    1.18 
  -2 -11  -2    7.98    1.09 
  -2 -11  -2    9.70    1.08 
  -2  11  -2    8.78    1.19 
   2  11   2   10.73    0.78 
  -3 -11  -2   18.79    1.61 
   3 -11   2   24.36    1.64 
  -3 -11  -2   21.68    1.47 
   3  11   2   19.50    0.89 
  -3  11  -2   22.37    1.70 
   4 -11   2   89.81    3.43 
  -4 -11  -2   94.05    3.24 
  -4 -11  -2   92.85    3.74 
  -4  11  -2   90.47    3.71 
   4  11   2   94.54    2.43 
  -5 -11  -2    2.57    0.96 
   5 -11   2    4.70    1.02 
  -5  11  -2    4.15    1.09 
  -6 -11  -2  129.87    5.16 
  -6  11  -2  143.50    5.18 
  -7 -11  -2    9.85    1.79 
  -7  11  -2    7.53    1.48 
  -8 -11  -2   87.89    4.41 
  -8  11  -2   80.99    4.10 
  -9 -11  -2    4.26    1.54 
  -9  11  -2    6.11    1.53 
 -10 -11  -2   12.11    2.37 
 -10  11  -2   16.78    2.41 
 -11 -11  -2    0.70    1.53 
 -11  11  -2    0.18    1.21 
 -12 -11  -2    4.04    1.89 
 -12  11  -2    3.65    1.61 
 -13 -11  -2    0.17    1.51 
 -13  11  -2   -0.07    1.48 
 -14 -11  -2   14.45    3.08 
 -14  11  -2   11.93    2.54 
 -14 -12   2    3.15    1.97 
 -13 -12   2   -2.35    1.43 
 -13  12   2    0.65    1.54 
 -12 -12   2   16.43    2.93 
 -12  12   2   20.72    3.01 
 -11 -12   2    8.02    2.12 
 -11  12   2    7.95    2.05 
 -10 -12   2   25.52    3.01 
 -10  12   2   24.76    2.78 
  -9 -12   2   24.58    2.76 
  -9  12   2   23.75    2.59 
   8 -12  -2   60.21    3.01 
  -8 -12   2   58.85    3.60 
  -8  12   2   60.48    3.55 
  -7 -12   2   76.63    3.91 
   7 -12  -2   70.88    3.19 
  -7  12   2   77.92    3.85 
   7  12  -2   74.05    2.96 
   6 -12  -2   85.45    3.51 
  -6 -12   2   87.74    4.01 
   6  12  -2   88.18    3.13 
  -6  12   2   87.95    3.96 
  -5 -12   2    2.67    0.97 
  -5 -12   2    4.07    0.79 
   5 -12  -2    5.05    1.01 
  -5  12   2    3.10    0.99 
   5  12  -2    3.74    0.78 
   4 -12  -2    1.95    0.72 
  -4 -12   2    2.04    0.65 
  -4 -12   2    1.71    0.76 
  -4  12   2    1.04    0.72 
   4  12  -2    1.93    0.61 
  -3 -12   2    0.11    0.55 
   3 -12  -2    0.07    0.54 
  -3 -12   2    0.22    0.45 
  -3  12   2    0.01    0.50 
   3  12  -2   -0.15    0.42 
  -2 -12   2   18.34    1.45 
   2 -12  -2   21.88    1.56 
   2  12  -2   18.73    1.29 
  -1 -12   2    9.68    1.11 
   1 -12  -2   10.70    1.20 
  -1 -12   2    9.25    1.06 
   1 -12  -2   11.39    0.88 
  -1  12   2    9.78    1.02 
   0 -12  -2  111.69    3.82 
   0 -12  -2  116.26    3.51 
   0 -12   2  123.64    3.58 
   0 -12   2  119.50    3.84 
   0  12   2  120.99    3.51 
   1 -12   2   45.97    1.73 
  -1 -12  -2   42.65    2.18 
  -1 -12  -2   44.23    2.06 
   1 -12   2   48.75    2.27 
   1  12   2   45.92    1.75 
  -1  12  -2   45.26    2.25 
  -2 -12  -2   68.10    2.76 
   2 -12   2   73.19    2.97 
  -2 -12  -2   69.73    2.88 
   2  12   2   71.31    2.16 
  -2  12  -2   75.28    3.08 
   3 -12   2   25.92    1.78 
  -3 -12  -2   25.75    1.88 
  -3 -12  -2   24.50    1.61 
  -3  12  -2   26.21    1.88 
   3  12   2   26.13    1.09 
   4 -12   2   92.43    3.52 
  -4 -12  -2   86.14    3.67 
  -4 -12  -2   83.93    3.14 
  -4  12  -2   86.41    3.67 
  -5 -12  -2   20.26    1.98 
   5 -12   2   16.14    1.63 
  -5  12  -2   18.76    1.87 
  -6 -12  -2    2.04    1.03 
   6 -12   2    1.05    0.77 
  -6  12  -2    1.60    0.89 
  -7 -12  -2    0.63    0.89 
  -7  12  -2   -0.93    0.77 
  -8 -12  -2   25.40    2.68 
  -8  12  -2   30.08    2.68 
  -9 -12  -2   10.18    2.10 
  -9  12  -2   12.61    2.04 
 -10 -12  -2   38.40    3.56 
 -10  12  -2   41.78    3.32 
 -11 -12  -2   33.21    3.55 
 -11  12  -2   30.22    3.13 
 -12 -12  -2   45.45    4.21 
 -12  12  -2   46.93    3.74 
 -13 -12  -2   11.42    2.69 
 -13  12  -2   15.57    2.70 
 -14 -12  -2    7.19    2.32 
 -13 -13   2   46.60    4.61 
 -13  13   2   49.34    4.34 
 -12 -13   2    5.94    2.25 
 -12  13   2    6.94    2.07 
 -11 -13   2   43.56    4.02 
 -11  13   2   49.83    3.83 
 -10 -13   2    3.55    1.58 
 -10  13   2    4.04    1.59 
  -9 -13   2    8.89    1.89 
   9 -13  -2   11.67    1.70 
  -9  13   2   10.06    1.95 
   8 -13  -2    1.44    0.96 
  -8 -13   2    2.08    1.19 
  -8  13   2    3.65    1.39 
  -7 -13   2   25.37    2.52 
   7 -13  -2   26.80    2.08 
  -7  13   2   25.30    2.44 
  -6 -13   2    0.45    0.90 
   6 -13  -2    0.44    0.74 
   6  13  -2    1.14    0.64 
  -6  13   2    2.44    1.04 
   5 -13  -2   78.41    3.36 
  -5 -13   2   81.04    2.93 
  -5 -13   2   74.42    3.65 
  -5  13   2   86.92    3.77 
   5  13  -2   83.06    2.93 
  -4 -13   2    3.04    0.76 
  -4 -13   2    2.84    0.99 
   4 -13  -2    2.44    0.82 
  -4  13   2    1.64    0.78 
   4  13  -2    2.18    0.69 
  -3 -13   2  106.11    3.98 
   3 -13  -2  100.25    3.77 
   3  13  -2  100.37    3.31 
  -3  13   2  103.13    3.81 
  -2 -13   2   21.05    1.49 
   2 -13  -2   21.25    1.64 
  -2 -13   2   27.34    1.81 
   2  13  -2   22.41    1.44 
  -1 -13   2   71.93    2.91 
  -1 -13   2   85.19    3.01 
   1 -13  -2   72.57    3.00 
   1 -13  -2   74.92    2.43 
  -1  13   2   71.60    2.76 
   0 -13  -2   23.15    1.65 
   0 -13  -2   22.50    1.39 
   0 -13   2   22.62    1.59 
   0 -13   2   22.07    1.35 
   0  13   2   24.15    1.40 
   1 -13   2    4.49    0.65 
   1 -13   2    3.15    0.83 
  -1 -13  -2    5.13    0.90 
  -1 -13  -2    5.49    1.00 
  -1  13  -2    3.93    0.93 
   1  13   2    3.84    0.66 
   2 -13   2    0.01    0.59 
  -2 -13  -2   -0.42    0.48 
  -2 -13  -2    0.75    0.60 
   2  13   2   -0.27    0.33 
  -2  13  -2    0.82    0.66 
  -3 -13  -2   33.13    1.97 
  -3 -13  -2   31.16    2.09 
   3 -13   2   36.92    2.20 
   3  13   2   35.57    1.34 
  -3  13  -2   31.62    2.17 
  -4 -13  -2   19.65    1.58 
  -4 -13  -2   21.42    1.94 
   4 -13   2   22.01    1.73 
  -4  13  -2   17.57    1.79 
   5 -13   2   57.90    2.92 
  -5 -13  -2   62.33    3.31 
  -5  13  -2   67.57    3.33 
   6 -13   2   22.42    1.96 
  -6 -13  -2   20.23    2.18 
  -6  13  -2   21.49    2.18 
  -7 -13  -2  108.45    4.88 
  -7  13  -2  107.15    4.79 
  -8 -13  -2    8.62    1.85 
  -8  13  -2   14.93    2.07 
  -9 -13  -2   54.35    3.76 
  -9  13  -2   45.88    3.30 
 -10 -13  -2    0.93    1.43 
 -10  13  -2    0.06    1.18 
 -11 -13  -2   14.70    2.63 
 -11  13  -2   13.37    2.33 
 -12 -13  -2   -0.98    1.43 
 -12  13  -2    1.08    1.40 
 -13 -13  -2    8.28    2.52 
 -13  13  -2   10.77    2.41 
 -13 -14   2    4.70    2.17 
 -13  14   2    2.76    1.86 
 -12 -14   2    0.09    1.61 
 -12  14   2   -0.60    1.40 
 -11 -14   2   19.20    2.98 
 -11  14   2   26.19    3.15 
 -10 -14   2    5.57    1.81 
 -10  14   2    1.16    1.41 
  -9 -14   2   74.45    4.52 
   9 -14  -2   83.06    3.83 
  -9  14   2   85.85    4.59 
   8 -14  -2    8.48    1.48 
  -8 -14   2    6.60    1.68 
  -8  14   2    8.84    1.79 
  -7 -14   2  136.65    5.67 
   7 -14  -2  138.55    4.96 
  -7  14   2  146.57    5.72 
   6 -14  -2    0.34    0.74 
  -6 -14   2   -0.39    0.79 
  -6  14   2    0.23    0.78 
  -5 -14   2   40.65    2.01 
  -5 -14   2   32.44    2.42 
   5 -14  -2   34.50    2.23 
  -5  14   2   34.01    2.45 
   5  14  -2   34.66    1.85 
   4 -14  -2    1.01    0.71 
  -4 -14   2    0.39    0.60 
  -4 -14   2    0.94    0.76 
  -4  14   2    0.70    0.75 
   4  14  -2    0.34    0.57 
   3 -14  -2    3.32    0.92 
  -3 -14   2    4.05    0.98 
  -3  14   2    3.87    0.94 
   3  14  -2    2.00    0.72 
   2 -14  -2   11.25    1.39 
  -2 -14   2   12.75    1.33 
  -2 -14   2   11.23    1.34 
   2  14  -2   12.02    1.17 
   1 -14  -2  166.19    5.20 
   1 -14  -2  178.69    4.50 
  -1 -14   2  168.16    5.09 
  -1 -14   2  159.60    4.94 
   1  14  -2  168.08    4.95 
  -1  14   2  161.86    4.87 
   0 -14  -2    1.18    0.69 
   0 -14   2    0.90    0.58 
   0 -14  -2    0.64    0.54 
   0 -14   2    0.84    0.71 
   0  14   2    1.11    0.57 
  -1 -14  -2  141.27    4.61 
   1 -14   2  141.77    4.65 
   1 -14   2  138.79    3.91 
  -1 -14  -2  144.20    4.44 
   1  14   2  141.36    3.98 
  -1  14  -2  145.26    4.72 
  -2 -14  -2    3.63    0.92 
   2 -14   2    2.96    0.89 
  -2 -14  -2    4.69    1.02 
   2  14   2    4.03    0.64 
  -2  14  -2    3.81    0.99 
   3 -14   2  223.89    6.59 
  -3 -14  -2  221.21    6.63 
  -3 -14  -2  223.27    6.28 
  -3  14  -2  223.49    6.81 
  -4 -14  -2    1.24    0.74 
  -4 -14  -2    1.31    0.81 
   4 -14   2    1.42    0.78 
  -4  14  -2    1.34    0.91 
  -5 -14  -2   75.17    3.70 
   5 -14   2   76.44    3.46 
  -5  14  -2   80.16    3.78 
   6 -14   2    5.13    1.25 
  -6 -14  -2    7.31    1.57 
  -6  14  -2    6.00    1.46 
  -7 -14  -2    3.14    1.00 
  -7 -14  -2    2.02    1.15 
  -7  14  -2    3.96    1.34 
  -8 -14  -2   -0.03    1.01 
  -8  14  -2    6.75    1.57 
  -9 -14  -2   42.89    3.43 
  -9  14  -2   39.09    3.11 
 -10 -14  -2    3.34    1.65 
 -10  14  -2    5.24    1.67 
 -11 -14  -2   77.13    5.00 
 -11  14  -2   77.75    4.71 
 -12 -14  -2    4.94    2.20 
 -12  14  -2    1.47    1.52 
 -13 -14  -2   45.70    4.54 
 -13  14  -2   34.88    3.80 
 -13 -15   2   37.86    4.36 
 -12 -15   2   28.99    3.71 
 -12  15   2   32.44    3.70 
 -11 -15   2   30.51    3.61 
 -11  15   2   36.55    3.66 
 -10 -15   2   20.87    2.92 
 -10  15   2   19.63    2.81 
  -9 -15   2    2.56    1.49 
   9 -15  -2    2.21    1.12 
  -9  15   2    1.17    1.26 
   8 -15  -2    3.26    1.23 
  -8 -15   2    3.50    1.58 
  -8  15   2    2.88    1.38 
  -7 -15   2   21.84    2.49 
   7 -15  -2   18.15    1.93 
  -7  15   2   19.35    2.33 
   6 -15  -2   70.17    3.43 
  -6 -15   2   67.15    3.79 
  -6  15   2   75.24    3.79 
  -5 -15   2  110.21    4.69 
  -5 -15   2  115.93    3.86 
   5 -15  -2  112.53    4.32 
   5  15  -2  109.47    3.67 
  -5  15   2  105.99    4.44 
  -4 -15   2   57.54    2.62 
   4 -15  -2   60.42    2.99 
  -4 -15   2   53.45    2.98 
   4  15  -2   53.84    2.38 
  -4  15   2   58.71    3.04 
   3 -15  -2  127.61    4.62 
  -3 -15   2  131.38    4.74 
  -3  15   2  136.76    4.71 
   3  15  -2  132.21    4.13 
   2 -15  -2   26.99    1.94 
  -2 -15   2   21.89    1.76 
  -2 -15   2   24.28    1.71 
   2  15  -2   22.15    1.55 
  -1 -15   2   30.26    1.98 
   1 -15  -2   30.35    1.52 
   1 -15  -2   28.82    1.99 
  -1 -15   2   31.99    1.91 
  -1  15   2   28.71    1.78 
   1  15  -2   29.15    1.85 
   0 -15   2    0.72    0.56 
   0 -15  -2    0.34    0.63 
   0 -15   2    1.02    0.67 
   0 -15  -2   -0.03    0.50 
   0  15   2   -0.26    0.48 
  -1 -15  -2    0.38    0.64 
   1 -15   2    0.51    0.47 
  -1 -15  -2    0.26    0.55 
   1 -15   2   -0.31    0.58 
  -1  15  -2   -0.23    0.53 
   1  15   2    0.41    0.51 
  -2 -15  -2    0.78    0.73 
   2 -15   2    1.51    0.75 
  -2 -15  -2    1.33    0.80 
   2  15   2    1.22    0.50 
  -2  15  -2    1.51    0.81 
  -3 -15  -2   11.91    1.39 
   3 -15   2   11.75    1.53 
  -3 -15  -2   11.00    1.47 
  -3  15  -2   10.80    1.53 
  -4 -15  -2   13.95    1.51 
  -4 -15  -2   13.51    1.70 
   4 -15   2   10.86    1.52 
  -4  15  -2   12.00    1.67 
   5 -15   2   67.96    3.37 
  -5 -15  -2   75.38    3.72 
  -5  15  -2   65.88    3.54 
   6 -15   2   61.24    3.25 
  -6 -15  -2   63.00    3.59 
  -6  15  -2   68.03    3.72 
  -7 -15  -2   35.09    3.03 
   7 -15   2   29.77    2.39 
  -7 -15  -2   33.94    2.16 
  -7  15  -2   25.13    2.63 
  -8 -15  -2   24.05    2.80 
  -8  15  -2   29.96    2.84 
  -9 -15  -2   25.43    3.03 
  -9  15  -2   30.21    3.01 
 -10 -15  -2   23.15    3.06 
 -10  15  -2   17.72    2.63 
 -11 -15  -2    4.01    1.82 
 -11  15  -2    2.92    1.72 
 -12 -15  -2    0.80    1.81 
 -12  15  -2    1.78    1.75 
 -13 -15  -2    3.96    2.31 
 -13 -16   2    0.09    1.79 
 -12 -16   2    5.06    2.06 
 -12  16   2    6.35    2.31 
 -11 -16   2    0.44    1.61 
 -11  16   2    2.50    1.66 
 -10 -16   2   48.43    3.86 
 -10  16   2   39.97    3.66 
  -9 -16   2   16.05    2.58 
   9 -16  -2   15.43    2.04 
  -9  16   2   13.76    2.38 
   8 -16  -2  103.13    4.47 
  -8 -16   2   99.72    5.10 
  -8  16   2  101.99    5.08 
   7 -16  -2    2.34    1.13 
  -7 -16   2    5.00    1.56 
  -7  16   2    3.03    1.34 
   6 -16  -2   36.26    2.51 
  -6 -16   2   41.43    2.95 
  -6  16   2   37.73    2.81 
   5 -16  -2    0.79    0.85 
  -5 -16   2   -0.50    0.85 
  -5 -16   2    1.50    0.79 
  -5  16   2    3.09    1.10 
   4 -16  -2    6.30    1.28 
  -4 -16   2    4.73    1.23 
  -4  16   2    6.77    1.28 
   4  16  -2    7.17    1.04 
   3 -16  -2    1.61    0.92 
  -3 -16   2    1.23    0.87 
  -3  16   2    1.67    0.89 
   3  16  -2    1.37    0.71 
  -2 -16   2   40.15    2.32 
   2 -16  -2   38.44    2.40 
  -2 -16   2   41.87    2.40 
   2  16  -2   42.87    2.19 
   1 -16  -2   10.41    1.47 
  -1 -16   2   10.96    1.42 
  -1 -16   2   10.26    1.27 
   1  16  -2   10.08    1.26 
  -1  16   2   10.15    1.24 
   0 -16  -2  167.29    4.79 
   0 -16   2  166.97    5.31 
   0 -16  -2  154.45    5.24 
   0 -16   2  165.37    4.80 
   0  16   2  156.40    4.72 
  -1 -16  -2   21.84    1.86 
   1 -16   2   24.44    1.44 
  -1 -16  -2   20.81    1.62 
   1 -16   2   22.48    1.91 
  -1  16  -2   24.34    1.87 
   1  16   2   22.80    1.43 
  -2 -16  -2  105.20    3.95 
  -2 -16  -2  101.33    3.93 
   2 -16   2  105.72    4.09 
  -2  16  -2   95.09    3.99 
   3 -16   2   37.65    2.45 
  -3 -16  -2   38.53    2.47 
  -3 -16  -2   38.64    2.39 
  -3  16  -2   40.82    2.52 
   4 -16   2   48.37    2.79 
  -4 -16  -2   44.16    2.46 
  -4 -16  -2   48.94    2.94 
  -4  16  -2   53.06    2.99 
  -5 -16  -2    7.55    1.33 
  -5 -16  -2    9.32    1.71 
   5 -16   2    9.89    1.64 
  -5  16  -2    9.64    1.65 
   6 -16   2   25.31    2.30 
  -6 -16  -2   23.80    2.47 
  -6  16  -2   26.30    2.53 
  -7 -16  -2    0.44    1.05 
  -7 -16  -2    2.50    1.04 
   7 -16   2    2.64    1.15 
  -7  16  -2    2.35    1.37 
  -8 -16  -2   11.02    2.14 
  -8  16  -2   14.33    2.26 
  -9 -16  -2    2.84    1.52 
  -9  16  -2    1.68    1.47 
 -10 -16  -2   63.70    4.51 
 -10  16  -2   68.32    4.44 
 -11 -16  -2    3.31    1.81 
 -11  16  -2    3.67    1.80 
 -12 -16  -2   67.85    4.94 
 -12  16  -2   61.05    4.53 
 -13 -16  -2    1.02    2.06 
 -12 -17   2   34.04    4.17 
 -12  17   2   43.73    4.22 
 -11 -17   2    3.79    1.91 
 -11  17   2    4.89    1.91 
 -10 -17   2   22.48    3.18 
 -10  17   2   23.59    3.11 
   9 -17  -2   -0.27    1.07 
  -9 -17   2    1.03    1.29 
  -9  17   2   -0.89    1.21 
   8 -17  -2    1.49    1.16 
  -8 -17   2    3.07    1.55 
  -8  17   2    0.04    1.21 
   7 -17  -2    5.35    1.40 
  -7 -17   2    6.47    1.66 
  -7  17   2    5.70    1.59 
   6 -17  -2   40.44    2.74 
  -6 -17   2   42.88    3.06 
  -6  17   2   46.89    3.09 
   5 -17  -2    6.58    1.43 
  -5 -17   2    4.95    1.14 
  -5 -17   2    4.64    1.32 
  -5  17   2    3.66    1.20 
   4 -17  -2  114.14    4.55 
  -4 -17   2  117.79    4.76 
  -4  17   2  118.02    4.62 
  -3 -17   2   11.46    1.45 
  -3 -17   2    6.85    1.38 
   3 -17  -2   11.59    1.67 
   3  17  -2    8.20    1.14 
  -3  17   2   11.03    1.54 
  -2 -17   2  106.49    4.04 
   2 -17  -2   94.33    4.05 
  -2 -17   2   97.63    3.88 
   2  17  -2  101.74    3.64 
  -1 -17   2   44.09    2.34 
  -1 -17   2   40.99    2.48 
   1 -17  -2   43.11    2.57 
   1  17  -2   41.72    2.33 
  -1  17   2   42.59    2.28 
   0 -17   2   19.63    1.51 
   0 -17  -2   16.15    1.77 
   0 -17  -2   17.11    1.42 
   0 -17   2   18.12    1.79 
   0  17   2   18.37    1.47 
  -1 -17  -2   13.19    1.42 
   1 -17   2   14.01    1.66 
  -1 -17  -2   16.36    1.74 
  -1  17  -2   16.74    1.70 
   2 -17   2    0.32    0.75 
  -2 -17  -2    0.06    0.67 
  -2 -17  -2   -0.10    0.68 
  -2  17  -2    0.10    0.80 
  -3 -17  -2    0.96    0.81 
  -3 -17  -2    1.29    0.86 
   3 -17   2    1.12    0.88 
  -3  17  -2    1.44    0.95 
   4 -17   2   31.62    2.37 
  -4 -17  -2   34.28    2.53 
  -4 -17  -2   36.54    2.42 
  -4  17  -2   32.01    2.41 
   5 -17   2   29.36    2.35 
  -5 -17  -2   33.16    2.23 
  -5 -17  -2   29.56    2.59 
  -5  17  -2   27.48    2.49 
   6 -17   2   58.29    3.31 
  -6 -17  -2   51.96    3.46 
  -6  17  -2   58.45    3.53 
   7 -17   2   13.96    1.98 
  -7 -17  -2   15.07    2.26 
  -7  17  -2   14.32    2.22 
  -8 -17  -2   47.02    3.57 
  -8  17  -2   62.94    3.98 
  -9 -17  -2    1.17    1.42 
  -9  17  -2    0.87    1.51 
 -10 -17  -2   20.07    3.11 
 -10  17  -2   19.97    2.95 
 -11 -17  -2    1.35    1.66 
 -11  17  -2    0.83    1.64 
 -12 -17  -2   -0.03    1.78 
 -12  17  -2    2.37    1.93 
 -12 -18   2    2.70    2.08 
 -11 -18   2   16.45    3.03 
 -11  18   2   16.87    2.95 
 -10 -18   2   24.92    3.31 
 -10  18   2   23.24    3.12 
  -9 -18   2   32.40    3.43 
   9 -18  -2   30.69    2.81 
  -9  18   2   32.84    3.34 
  -8 -18   2   24.27    2.94 
   8 -18  -2   29.56    2.63 
  -8  18   2   25.49    2.88 
  -7 -18   2   42.80    3.29 
   7 -18  -2   37.21    2.85 
  -7  18   2   39.27    3.08 
  -6 -18   2   37.07    3.00 
   6 -18  -2   38.07    2.73 
  -6  18   2   43.36    3.05 
  -5 -18   2   30.43    2.65 
   5 -18  -2   33.57    2.52 
  -5 -18   2   28.53    2.13 
  -5  18   2   31.85    2.50 
   4 -18  -2    1.53    0.98 
  -4 -18   2    0.22    0.94 
  -4  18   2   -0.57    0.77 
  -3 -18   2   -0.95    0.72 
   3 -18  -2    1.23    0.91 
  -3 -18   2    0.02    0.78 
   2 -18  -2    2.48    1.04 
  -2 -18   2    3.10    1.02 
  -2 -18   2    2.22    0.93 
  -2  18   2    1.22    0.85 
   2  18  -2    3.89    0.97 
   1 -18  -2   38.72    2.54 
  -1 -18   2   43.54    2.55 
  -1 -18   2   46.83    2.46 
   1  18  -2   42.13    2.41 
  -1  18   2   41.50    2.31 
   0 -18   2   54.44    2.97 
   0 -18  -2   56.00    3.02 
   0 -18   2   52.63    2.51 
   0  18   2   59.29    2.59 
  -1 -18  -2  108.06    3.92 
  -1 -18  -2   96.32    4.13 
   1 -18   2  108.89    4.30 
  -2 -18  -2   34.36    2.26 
  -2 -18  -2   34.61    2.40 
   2 -18   2   31.70    2.39 
  -2  18  -2   32.53    2.37 
  -3 -18  -2  110.28    4.45 
  -3 -18  -2  105.68    4.28 
   3 -18   2  110.74    4.57 
  -3  18  -2  110.32    4.56 
   4 -18   2   41.08    2.75 
  -4 -18  -2   38.54    2.69 
  -4 -18  -2   43.58    2.66 
  -4  18  -2   41.05    2.78 
   5 -18   2   11.51    1.79 
  -5 -18  -2   17.40    2.16 
  -5 -18  -2   16.66    1.84 
  -5  18  -2   15.56    2.09 
  -6 -18  -2    1.25    1.06 
   6 -18   2    1.64    1.06 
  -6  18  -2    1.85    1.21 
  -7 -18  -2    3.95    1.55 
   7 -18   2    3.10    1.28 
  -7  18  -2    1.45    1.39 
  -8 -18  -2    1.48    1.42 
  -8  18  -2    4.77    1.60 
  -9 -18  -2   32.38    3.44 
  -9  18  -2   39.10    3.64 
 -10 -18  -2   20.93    3.14 
 -10  18  -2   20.00    3.03 
 -11 -18  -2   43.94    4.25 
 -11  18  -2   50.59    4.44 
 -12 -18  -2   19.05    3.26 
 -12 -19   2   -2.42    1.38 
 -11 -19   2   18.16    3.14 
 -11  19   2   23.84    3.42 
 -10 -19   2    1.36    1.69 
  10 -19  -2    2.06    1.46 
 -10  19   2    3.31    1.70 
  -9 -19   2    0.50    1.48 
   9 -19  -2    1.97    1.28 
  -9  19   2   -0.97    1.18 
  -8 -19   2    1.53    1.41 
   8 -19  -2    2.50    1.38 
  -8  19   2    1.92    1.33 
  -7 -19   2   29.26    2.98 
   7 -19  -2   29.00    2.68 
  -7  19   2   25.10    2.79 
  -6 -19   2    1.09    1.23 
   6 -19  -2    0.82    1.09 
  -6  19   2    2.14    1.26 
   5 -19  -2   62.51    3.55 
  -5 -19   2   59.67    3.56 
  -5 -19   2   64.33    3.13 
  -5  19   2   62.77    3.59 
  -4 -19   2    6.46    1.55 
   4 -19  -2    5.56    1.37 
  -4  19   2    8.81    1.61 
  -3 -19   2  158.13    5.59 
  -3 -19   2  150.26    5.24 
   3 -19  -2  142.88    5.48 
   2 -19  -2    2.90    1.14 
  -2 -19   2    3.21    1.13 
  -2 -19   2    2.96    1.06 
  -2  19   2    5.04    1.16 
   2  19  -2    3.53    1.00 
   1 -19  -2  117.99    4.79 
  -1 -19   2  123.54    4.72 
  -1 -19   2  132.17    4.54 
  -1  19   2  127.96    4.46 
   1  19  -2  128.81    4.53 
   0 -19   2    4.66    1.25 
   0 -19  -2    5.29    1.29 
  -1 -19  -2   10.56    1.65 
   1 -19   2   11.24    1.68 
  -1 -19  -2   13.87    1.54 
   2 -19   2   -0.32    0.79 
  -2 -19  -2   -0.07    0.79 
  -2 -19  -2    0.24    0.80 
  -2  19  -2    0.15    0.92 
  -3 -19  -2   18.97    1.98 
  -3 -19  -2   20.01    2.03 
   3 -19   2   16.48    2.04 
  -3  19  -2   16.29    2.00 
  -4 -19  -2    0.07    0.88 
  -4 -19  -2    0.50    0.92 
   4 -19   2    0.64    0.96 
  -4  19  -2    0.35    0.90 
  -5 -19  -2   71.80    3.51 
  -5 -19  -2   74.29    3.97 
   5 -19   2   76.28    3.89 
  -5  19  -2   67.45    3.86 
   6 -19   2   -0.37    0.97 
  -6 -19  -2   -0.51    0.92 
  -6  19  -2    1.52    1.24 
  -7 -19  -2   93.51    4.84 
   7 -19   2   83.29    4.32 
  -7  19  -2   87.42    4.72 
  -8 -19  -2    2.83    1.49 
  -8  19  -2    1.29    1.47 
  -9 -19  -2   23.83    3.15 
  -9  19  -2   25.29    3.21 
 -10 -19  -2   -0.27    1.26 
 -10  19  -2    0.86    1.77 
 -11 -19  -2    3.96    2.01 
 -11  19  -2    5.06    2.14 
 -12 -19  -2    0.16    1.69 
 -11 -20   2   18.49    3.28 
 -11  20   2   17.52    3.06 
  10 -20  -2   16.10    2.45 
 -10 -20   2    8.05    2.38 
 -10  20   2   12.30    2.55 
   9 -20  -2   47.87    3.47 
  -9 -20   2   49.00    3.97 
  -9  20   2   51.86    3.88 
   8 -20  -2   14.31    2.22 
  -8  20   2    9.54    2.26 
   7 -20  -2   42.88    3.21 
  -7 -20   2   38.90    3.46 
  -7  20   2   46.29    3.48 
   6 -20  -2   15.21    2.15 
  -6 -20   2   18.62    2.52 
  -6  20   2   21.95    2.58 
   5 -20  -2   26.70    2.54 
  -5 -20   2   26.15    2.62 
  -5  20   2   23.56    2.47 
   4 -20  -2    0.99    1.04 
  -4 -20   2    1.95    1.10 
  -4  20   2    1.35    1.01 
  -3 -20   2    0.72    0.95 
   3 -20  -2    1.13    1.02 
  -3 -20   2    0.91    0.98 
  -2 -20   2   10.13    1.58 
   2 -20  -2   12.09    1.82 
  -2 -20   2   11.63    1.70 
  -2  20   2   10.28    1.55 
   1 -20  -2   46.04    2.91 
  -1 -20   2   40.30    2.46 
  -1 -20   2   42.39    2.76 
   1  20  -2   38.72    2.43 
   0 -20  -2   40.32    2.74 
   0 -20   2   44.36    2.85 
  -1 -20  -2   70.96    3.62 
   1 -20   2   77.23    3.77 
   2 -20   2   67.33    3.69 
  -2 -20  -2   76.10    3.68 
  -2 -20  -2   78.45    3.57 
  -2  20  -2   77.53    3.81 
  -3 -20  -2  121.77    4.90 
   3 -20   2  130.09    5.26 
  -3 -20  -2  134.31    5.12 
  -3  20  -2  128.23    5.23 
  -4 -20  -2   13.68    1.98 
  -4 -20  -2   14.43    1.93 
   4 -20   2   14.47    2.02 
  -4  20  -2   15.51    2.13 
  -5 -20  -2    4.86    1.51 
  -5 -20  -2    3.28    1.25 
   5 -20   2    6.41    1.62 
  -5  20  -2    2.15    1.34 
  -6 -20  -2   -1.28    1.03 
   6 -20   2   -0.49    0.97 
  -6  20  -2   -1.53    0.72 
   7 -20   2    4.99    1.61 
  -7 -20  -2    6.70    1.84 
  -7  20  -2    8.32    1.99 
  -8 -20  -2    1.20    1.39 
  -8  20  -2    5.34    1.70 
  -9 -20  -2   32.25    3.52 
  -9  20  -2   30.72    3.45 
 -10 -20  -2   11.46    2.49 
 -10  20  -2    8.85    2.41 
 -11 -20  -2   36.76    4.13 
 -11  20  -2   35.59    4.12 
 -11 -21   2    3.14    2.01 
  10 -21  -2    7.55    1.93 
 -10 -21   2    8.96    2.44 
 -10  21   2    7.55    2.10 
   9 -21  -2   -0.27    1.15 
  -9 -21   2    0.09    1.47 
  -9  21   2    1.06    1.67 
   8 -21  -2    5.03    1.65 
  -8 -21   2    3.95    1.78 
  -8  21   2    5.12    1.92 
   7 -21  -2   -0.01    1.18 
  -7 -21   2    2.07    1.46 
  -7  21   2    0.58    1.34 
  -6 -21   2   13.74    2.32 
   6 -21  -2    8.93    1.82 
  -6  21   2    9.91    2.02 
   5 -21  -2   21.95    2.47 
  -5 -21   2   21.02    2.53 
  -5  21   2   21.31    2.47 
  -4 -21   2   39.48    2.96 
   4 -21  -2   46.84    3.13 
  -4  21   2   43.61    2.98 
  -3 -21   2   24.43    2.23 
  -3 -21   2   20.26    2.21 
   3 -21  -2   22.02    2.36 
   2 -21  -2  112.32    4.94 
  -2 -21   2  120.15    4.67 
  -2 -21   2  118.29    4.69 
  -2  21   2  108.37    4.42 
  -1 -21   2   62.88    3.37 
   1 -21  -2   60.23    3.46 
   0 -21  -2   21.84    2.32 
   0 -21   2   24.52    2.34 
   0  21  -2   22.27    2.02 
   1 -21   2    1.81    1.11 
  -1 -21  -2    0.22    0.96 
  -2 -21  -2   -0.61    0.78 
  -2 -21  -2    0.37    0.87 
   2 -21   2    0.42    1.00 
  -2  21  -2   -0.14    0.93 
  -3 -21  -2    5.00    1.37 
   3 -21   2    3.76    1.41 
  -3 -21  -2    5.61    1.44 
  -3  21  -2    4.30    1.37 
   4 -21   2   39.67    3.01 
  -4 -21  -2   31.95    2.51 
  -4 -21  -2   35.46    2.80 
  -4  21  -2   36.38    2.83 
  -5 -21  -2   47.47    3.34 
   5 -21   2   49.43    3.39 
  -5 -21  -2   50.23    3.13 
  -5  21  -2   43.37    3.30 
   6 -21   2   66.21    3.97 
  -6 -21  -2   69.96    4.17 
  -6  21  -2   55.07    3.78 
  -7 -21  -2   29.79    3.12 
   7 -21   2   27.77    2.87 
  -7  21  -2   29.63    3.14 
  -8 -21  -2   35.66    3.60 
  -8  21  -2   41.29    3.79 
  -9 -21  -2   12.25    2.51 
  -9  21  -2    4.04    2.06 
 -10 -21  -2    3.20    1.99 
 -10  21  -2    3.05    1.92 
 -11 -21  -2    1.11    1.85 
 -10 -22   2   30.58    3.85 
  10 -22  -2   33.11    3.29 
 -10  22   2   24.09    3.46 
   9 -22  -2    0.33    1.29 
  -9 -22   2    0.00    1.58 
  -9  22   2   -0.54    1.65 
  -8 -22   2   39.49    3.81 
   8 -22  -2   41.78    3.34 
  -8  22   2   40.15    3.71 
  -7 -22   2   -0.50    1.28 
   7 -22  -2   -1.01    1.10 
  -7  22   2    0.50    1.42 
  -6 -22   2   59.00    3.96 
   6 -22  -2   56.87    3.68 
  -6  22   2   55.98    3.89 
  -5 -22   2    0.84    1.20 
   5 -22  -2    0.78    1.11 
  -5  22   2   -1.00    1.05 
   4 -22  -2    3.67    1.41 
  -4 -22   2    6.50    1.69 
  -4  22   2    5.73    1.51 
  -3 -22   2   -0.22    0.99 
  -3 -22   2    0.74    1.04 
   3 -22  -2   -0.01    1.03 
  -2 -22   2   17.75    2.10 
   2 -22  -2   16.02    2.18 
  -1 -22   2    0.46    1.08 
   1 -22  -2    0.83    1.12 
   0 -22   2   56.56    3.35 
   0 -22  -2   59.63    3.50 
   0  22  -2   58.20    3.22 
  -1 -22  -2    1.73    1.06 
   1 -22   2    0.88    1.07 
  -2 -22  -2  142.97    5.63 
   2 -22   2  148.83    5.85 
  -2  22  -2  148.47    5.67 
  -3 -22  -2   -0.16    0.94 
  -3 -22  -2    0.61    1.12 
   3 -22   2    0.83    1.06 
  -3  22  -2    1.08    1.21 
  -4 -22  -2   80.30    4.21 
   4 -22   2   86.51    4.42 
  -4 -22  -2   88.19    4.23 
  -4  22  -2   83.39    4.38 
  -5 -22  -2    5.42    1.57 
   5 -22   2    5.01    1.65 
  -5 -22  -2    5.42    1.59 
  -5  22  -2    5.49    1.60 
  -6 -22  -2    1.01    1.36 
   6 -22   2    4.73    1.65 
  -6 -22  -2    5.24    1.46 
  -6  22  -2    2.85    1.53 
  -7 -22  -2   -0.38    1.16 
   7 -22   2   -1.36    1.04 
  -7  22  -2   -0.60    1.36 
  -8 -22  -2    8.60    2.16 
   8 -22   2   11.09    2.20 
  -8  22  -2   10.98    2.27 
  -9 -22  -2    1.47    1.77 
  -9  22  -2    3.38    1.79 
 -10 -22  -2   32.45    3.90 
 -10  22  -2   29.93    3.81 
 -10 -23   2   13.26    2.85 
  10 -23  -2   15.44    2.64 
 -10  23   2   11.46    2.85 
   9 -23  -2    0.90    1.37 
  -9 -23   2    1.44    1.80 
  -9  23   2   -2.34    1.35 
  -8 -23   2    1.49    1.72 
   8 -23  -2   -0.06    1.35 
  -8  23   2   -0.37    1.70 
   7 -23  -2    1.44    1.45 
  -7 -23   2    1.34    1.57 
  -7  23   2    0.26    1.53 
  -6 -23   2   10.37    2.18 
   6 -23  -2   10.28    2.13 
  -6  23   2   15.02    2.41 
   5 -23  -2   25.17    2.75 
  -5 -23   2   26.13    2.83 
  -5  23   2   25.39    2.73 
  -4 -23   2   27.46    2.52 
  -4 -23   2   28.12    2.72 
   4 -23  -2   25.55    2.74 
  -4  23   2   31.14    2.73 
   3 -23  -2   34.39    3.00 
  -3 -23   2   41.27    2.93 
  -3 -23   2   36.70    2.84 
   2 -23  -2   67.97    3.93 
  -2 -23   2   69.07    3.79 
  -1 -23   2    6.31    1.60 
   1 -23  -2    5.11    1.51 
   0 -23  -2   29.46    2.77 
   0 -23   2   31.04    2.73 
   1 -23   2    1.13    1.10 
  -1 -23  -2    0.27    1.09 
   2 -23   2   -0.95    1.04 
  -2 -23  -2   -0.81    1.01 
  -2  23  -2    0.88    1.22 
   3 -23   2    1.21    1.25 
  -3 -23  -2    2.51    1.28 
  -3  23  -2    3.21    1.36 
  -4 -23  -2   24.69    2.60 
   4 -23   2   26.50    2.79 
  -4 -23  -2   28.24    2.68 
  -4  23  -2   24.33    2.70 
  -5 -23  -2   15.62    2.13 
   5 -23   2   12.30    2.18 
  -5 -23  -2   11.24    2.09 
  -5  23  -2   11.34    2.24 
   6 -23   2   61.66    4.07 
  -6 -23  -2   65.11    4.11 
  -6 -23  -2   62.25    3.61 
  -6  23  -2   65.04    4.25 
  -7 -23  -2   15.72    2.65 
   7 -23   2   17.13    2.64 
  -7  23  -2   16.53    2.63 
  -8 -23  -2   30.75    3.52 
   8 -23   2   30.53    3.29 
  -8  23  -2   30.79    3.51 
  -9 -23  -2    7.77    2.28 
 -10 -23  -2    8.12    2.48 
  -9 -24   2   47.76    4.43 
   9 -24  -2   50.61    3.86 
  -9  24   2   55.21    4.66 
   8 -24  -2    5.59    1.89 
  -8 -24   2    5.47    2.08 
  -8  24   2    4.75    1.99 
   7 -24  -2   48.69    3.65 
  -7 -24   2   57.61    4.19 
  -7  24   2   42.86    3.80 
   6 -24  -2    6.02    1.86 
  -6 -24   2    4.78    1.72 
  -6  24   2    1.67    1.55 
  -5 -24   2   12.16    2.24 
   5 -24  -2    8.35    1.94 
  -5  24   2   11.54    2.13 
  -4 -24   2    0.22    1.09 
  -4 -24   2    0.75    1.26 
   4 -24  -2   -0.56    1.20 
   3 -24  -2    4.86    1.65 
  -3 -24   2    3.32    1.38 
   2 -24  -2    2.60    1.34 
  -2 -24   2    2.14    1.34 
   1 -24  -2   51.81    3.58 
  -1 -24   2   46.03    3.19 
   0 -24  -2   10.79    2.11 
   0 -24   2    9.80    1.83 
   1 -24   2   69.13    3.94 
  -1 -24  -2   70.22    3.98 
   2 -24   2    5.46    1.68 
  -2 -24  -2    4.29    1.51 
  -3 -24  -2   21.09    2.46 
   3 -24   2   21.72    2.73 
  -3  24  -2   25.36    2.61 
  -4 -24  -2   11.10    2.01 
   4 -24   2   14.61    2.25 
  -4 -24  -2    9.97    1.91 
  -4  24  -2    9.62    2.00 
  -5 -24  -2   15.31    2.38 
  -5 -24  -2   14.68    2.20 
   5 -24   2    8.21    1.93 
  -5  24  -2   14.06    2.43 
   6 -24   2    0.33    1.29 
  -6 -24  -2    2.38    1.45 
  -6  24  -2   -0.67    1.34 
   7 -24   2    0.10    1.34 
  -7 -24  -2   -0.08    1.40 
  -7  24  -2   -3.65    1.19 
   8 -24   2   -0.68    1.55 
  -8 -24  -2   -0.28    1.41 
  -8  24  -2    2.36    1.66 
  -9 -24  -2   20.79    3.20 
  -9  24  -2   16.41    3.08 
  -9 -25   2    9.96    2.62 
   9 -25  -2   11.75    2.46 
  -9  25   2    5.54    2.35 
  -8 -25   2    1.02    1.71 
   8 -25  -2    0.18    1.48 
  -8  25   2   -0.46    1.63 
  -7 -25   2   16.10    2.74 
   7 -25  -2   13.69    2.50 
  -7  25   2   15.69    2.71 
  -6 -25   2    0.92    1.47 
   6 -25  -2    0.94    1.47 
  -6  25   2    0.72    1.45 
   5 -25  -2   78.70    4.60 
  -5 -25   2   77.98    4.59 
   4 -25  -2   12.52    2.26 
  -4 -25   2   13.90    2.17 
   3 -25  -2   75.03    4.35 
  -3 -25   2   73.03    4.08 
   2 -25  -2    3.00    1.45 
  -2 -25   2    2.14    1.41 
   1 -25  -2   36.10    3.26 
  -1 -25   2   41.73    3.20 
   0 -25   2    0.59    1.18 
   0 -25  -2    0.47    1.22 
  -1 -25  -2   -0.79    1.04 
   1 -25   2   -1.27    0.89 
   2 -25   2    0.33    1.34 
  -2 -25  -2    2.52    1.43 
  -3 -25  -2    3.86    1.57 
   3 -25   2    4.40    1.71 
  -3  25  -2    3.04    1.45 
  -4 -25  -2    2.95    1.39 
   4 -25   2    1.82    1.49 
  -4  25  -2    1.10    1.38 
  -5 -25  -2   71.27    4.11 
  -5 -25  -2   62.51    4.08 
   5 -25   2   59.45    4.13 
  -5  25  -2   67.29    4.29 
   6 -25   2   -1.01    1.25 
  -6 -25  -2    1.88    1.47 
  -6  25  -2   -1.34    1.26 
   7 -25   2   55.85    4.08 
  -7 -25  -2   63.41    4.33 
  -7  25  -2   53.93    4.39 
  -8 -25  -2    2.69    1.84 
   8 -25   2    1.26    1.69 
  -8  25  -2    3.54    1.84 
  -9 -25  -2   45.15    4.39 
   8 -26  -2   46.27    3.97 
  -8 -26   2   45.91    4.29 
  -8  26   2   39.02    3.96 
  -7 -26   2   42.92    3.99 
   7 -26  -2   37.88    3.66 
  -7  26   2   36.99    3.69 
   6 -26  -2   24.23    3.04 
  -6 -26   2   22.82    3.04 
   5 -26  -2    7.63    2.02 
   4 -26  -2    0.83    1.35 
   3 -26  -2    9.28    2.07 
  -2 -26   2    2.40    1.49 
   2 -26  -2   -0.13    1.34 
   1 -26  -2   20.53    2.76 
  -1 -26   2   19.66    2.53 
   0 -26  -2   27.87    2.97 
   0 -26   2   33.85    3.17 
  -1 -26  -2   33.44    3.12 
   1 -26   2   33.71    3.20 
   2 -26   2   38.96    3.49 
  -2 -26  -2   40.60    3.25 
  -3 -26  -2   14.01    2.27 
   3 -26   2   10.29    2.21 
  -4 -26  -2   22.25    2.79 
   4 -26   2   22.34    2.88 
  -4  26  -2   23.08    2.78 
   5 -26   2   13.36    2.40 
  -5 -26  -2    5.10    1.78 
  -5  26  -2    8.64    2.11 
   6 -26   2    3.78    1.85 
  -6 -26  -2    4.23    1.82 
  -6  26  -2    1.46    1.72 
   7 -26   2    0.44    1.44 
  -7 -26  -2    2.64    1.73 
  -7  26  -2   -5.56    1.39 
  -8 -26  -2    6.10    2.14 
   8 -26   2    4.83    1.99 
  -8  26  -2    7.44    2.16 
  -7 -27   2    1.99    1.80 
   7 -27  -2    5.14    2.00 
   6 -27  -2   28.13    3.34 
   5 -27  -2   13.92    2.59 
   4 -27  -2   46.41    3.89 
   3 -27  -2   14.16    2.53 
  -3 -27   2   15.15    2.43 
  -2 -27   2   72.79    4.30 
   2 -27  -2   82.25    4.79 
  -1 -27   2    0.33    1.35 
   1 -27  -2    3.07    1.51 
   0 -27  -2   11.74    2.28 
   0 -27   2    5.79    1.82 
   1 -27   2   -1.80    1.07 
  -1 -27  -2    0.71    1.29 
  -2 -27  -2   -1.92    1.18 
   2 -27   2    1.07    1.58 
  -3 -27  -2   -1.10    1.33 
   3 -27   2    1.68    1.62 
  -4 -27  -2   32.89    3.19 
   4 -27   2   35.58    3.51 
  -5 -27  -2    0.71    1.43 
   5 -27   2    2.94    1.71 
  -5  27  -2    5.59    1.95 
   6 -27   2   53.39    4.09 
  -6  27  -2   45.77    4.04 
   7 -27   2    6.50    2.17 
  -7 -27  -2    5.03    2.05 
  -7  27  -2    3.95    1.97 
   6 -28  -2   42.97    4.05 
   5 -28  -2   -0.12    1.57 
   4 -28  -2    1.58    1.57 
  -3 -28   2   -1.19    1.36 
   3 -28  -2   -1.70    1.16 
   2 -28  -2   10.82    2.32 
  -2 -28   2    7.48    2.05 
  -1 -28   2    1.54    1.73 
   1 -28  -2    3.90    1.78 
   0 -28   2   51.01    3.75 
   0 -28  -2   43.26    3.77 
   1 -28   2   11.52    2.31 
  -1 -28  -2    6.05    1.99 
  -2 -28  -2   47.17    3.85 
   2 -28   2   49.13    3.82 
   3 -28   2    3.54    1.95 
  -3 -28  -2    7.18    2.16 
   4 -28   2   36.75    3.69 
  -4 -28  -2   34.98    3.34 
   5 -28   2   -0.72    1.40 
  -5 -28  -2    0.49    1.45 
   6 -28   2    5.32    2.10 
  -6  28  -2    0.90    1.81 
   5 -29  -2   25.14    3.39 
   4 -29  -2   10.99    2.46 
  -3 -29   2   50.19    3.84 
   3 -29  -2   44.00    4.03 
   2 -29  -2   15.14    2.66 
  -2 -29   2    9.95    2.36 
   1 -29  -2   22.41    3.11 
  -1 -29   2   27.94    3.22 
   0 -29  -2    2.61    1.68 
   0 -29   2    3.80    1.86 
   1 -29   2    2.80    1.62 
  -1 -29  -2    1.16    1.65 
   2 -29   2   -0.35    1.51 
  -2 -29  -2    0.36    1.40 
   3 -29   2   17.53    2.86 
  -3 -29  -2   12.17    2.56 
   4 -29   2   22.95    3.23 
  -4 -29  -2   22.03    2.98 
   5 -29   2   31.76    3.76 
   3 -30  -2    1.32    1.71 
  -3 -30   2   -1.09    1.46 
   2 -30  -2    1.55    1.73 
  -2 -30   2    3.14    1.88 
  -1 -30   2   17.38    2.93 
   1 -30  -2   20.05    3.09 
   0 -30   2    0.01    1.54 
   0 -30  -2   -0.55    1.52 
  -1 -30  -2   52.48    4.28 
   1 -30   2   63.32    4.56 
  -2 -30  -2   -2.68    1.51 
   2 -30   2    2.15    1.73 
  -3 -30  -2   72.50    4.72 
   3 -30   2   71.74    4.86 
  -1 -31   2   30.30    3.58 
   1 -31  -2   34.94    3.83 
   0 -31   2    6.49    2.29 
   0 -31  -2    6.96    2.19 
   1 -31   2    6.34    2.20 
  -1 -31  -2    7.16    2.30 
 -15   0   3   19.03    2.79 
 -14   0   3    0.25    1.36 
 -13   0   3    1.51    1.39 
 -12   0   3    0.17    0.97 
 -11   0   3   36.11    2.82 
 -10   0   3    0.25    0.83 
  -9   0   3  105.09    4.33 
  -9   0   3  111.16    4.34 
  -8   0   3   -0.57    0.59 
  -8   0   3    0.35    0.68 
  -7   0   3  149.11    4.95 
  -7   0   3  153.74    4.89 
  -6   0   3    0.02    0.53 
  -6   0   3    0.25    0.52 
  -5   0   3   86.56    3.14 
  -5   0   3   95.14    3.18 
  -4   0   3   -0.32    0.32 
  -4   0   3   -0.39    0.34 
  -3   0   3   24.47    1.29 
  -3   0   3   25.34    1.22 
  -2   0   3   -0.59    0.22 
  -2   0   3    0.12    0.25 
  -1   0   3    2.30    0.38 
   0   0  -3    0.11    0.16 
  -1   0  -3   24.71    1.03 
  -1   0  -3   25.14    0.93 
  -2   0  -3   -0.68    0.25 
  -2   0  -3    0.15    0.28 
  -3   0  -3  521.89   11.43 
  -3   0  -3  518.18   11.63 
  -4   0  -3   -0.21    0.40 
  -4   0  -3   -0.14    0.34 
  -5   0  -3  182.87    5.25 
  -5   0  -3  175.24    4.87 
  -6   0  -3   -0.37    0.55 
  -6   0  -3   -0.07    0.46 
  -7   0  -3    7.29    1.27 
  -7   0  -3    7.10    1.09 
  -8   0  -3    0.04    0.79 
  -8   0  -3   -0.28    0.60 
  -9   0  -3   45.16    2.55 
  -9   0  -3   49.48    3.01 
 -10   0  -3   -0.30    0.75 
 -10   0  -3   -0.98    0.94 
 -11   0  -3   61.19    3.76 
 -11   0  -3   56.39    3.28 
 -12   0  -3   -0.89    1.17 
 -12   0  -3    0.02    0.97 
 -15  -1   3   17.14    2.74 
 -15   1   3   21.72    2.97 
 -14  -1   3   16.55    2.53 
 -14   1   3   15.48    2.56 
 -13  -1   3   66.86    4.05 
 -13   1   3   60.23    3.98 
 -12  -1   3   19.79    2.49 
 -12  -1   3   20.83    2.37 
 -12   1   3   17.58    2.38 
 -11  -1   3   52.32    3.29 
 -11  -1   3   59.27    3.57 
 -11   1   3   55.32    3.44 
 -10  -1   3   18.29    2.01 
 -10  -1   3   18.76    2.07 
 -10   1   3   16.38    2.04 
  -9  -1   3   10.92    1.57 
  -9  -1   3    8.05    1.50 
  -9   1   3    9.42    1.53 
  -8  -1   3    1.25    0.78 
  -8  -1   3    1.17    0.78 
  -8   1   3    0.55    0.70 
  -7  -1   3    3.41    0.95 
  -7  -1   3    3.77    0.96 
  -7   1   3    3.66    0.93 
  -6  -1   3   76.78    3.02 
  -6  -1   3   67.50    2.86 
  -6   1   3   73.55    2.97 
  -5  -1   3   52.57    2.31 
  -5   1   3   51.74    2.28 
  -4  -1   3   83.54    2.81 
  -4  -1   3   81.09    2.75 
  -4   1   3   76.20    2.74 
  -3  -1   3  131.35    3.66 
  -3  -1   3  131.07    3.65 
  -3   1   3  127.46    3.66 
  -2  -1   3    1.31    0.39 
  -2  -1   3    1.35    0.40 
  -2   1   3    0.92    0.36 
  -1   1   3  228.49    5.29 
   0  -1  -3   94.64    2.34 
   0   1  -3   94.00    2.44 
  -1  -1  -3   10.57    0.69 
  -1  -1  -3   11.14    0.54 
  -1   1  -3   10.95    0.64 
  -2  -1  -3    0.44    0.34 
  -2  -1  -3    0.82    0.28 
  -2   1  -3    0.98    0.36 
  -2   1  -3    0.50    0.31 
  -3  -1  -3    8.83    0.70 
  -3  -1  -3   11.06    0.99 
  -3   1  -3    9.41    0.84 
  -3   1  -3   10.07    0.83 
  -4  -1  -3   32.43    1.74 
  -4  -1  -3   31.98    1.42 
  -4   1  -3   31.76    1.52 
  -5  -1  -3  198.88    5.80 
  -5  -1  -3  209.26    5.38 
  -5   1  -3  211.38    5.59 
  -6  -1  -3   97.54    3.34 
  -6  -1  -3   99.09    3.80 
  -6   1  -3  105.75    3.55 
  -6   1  -3  105.87    3.74 
  -7  -1  -3  176.88    5.31 
  -7  -1  -3  190.66    5.97 
  -7   1  -3  181.51    5.75 
  -7   1  -3  190.25    5.59 
  -8  -1  -3   43.96    2.32 
  -8  -1  -3   40.64    2.67 
  -8   1  -3   41.36    2.60 
  -8   1  -3   41.21    2.33 
  -9  -1  -3   75.50    3.90 
  -9  -1  -3   74.79    3.32 
  -9   1  -3   81.54    3.58 
  -9   1  -3   79.22    3.83 
 -10  -1  -3   22.94    2.05 
 -10  -1  -3   18.98    2.32 
 -10   1  -3   22.80    2.10 
 -11  -1  -3    4.84    1.28 
 -11  -1  -3    4.00    1.51 
 -11   1  -3    5.59    1.40 
 -12  -1  -3    1.27    1.40 
 -12  -1  -3    1.36    1.15 
 -12   1  -3    0.76    1.11 
 -13  -1  -3   -1.41    1.37 
 -13   1  -3    0.59    1.24 
 -15   2   3    7.29    2.10 
 -14  -2   3    5.26    1.80 
 -14   2   3    5.17    1.77 
 -13  -2   3    0.00    1.31 
 -13  -2   3   -0.62    1.11 
 -13   2   3   -0.17    1.28 
 -12  -2   3    2.21    1.46 
 -12  -2   3    3.10    1.29 
 -12   2   3    2.11    1.26 
 -11  -2   3    2.92    1.36 
 -11  -2   3    3.99    1.27 
 -11   2   3    3.46    1.26 
 -10  -2   3   48.98    3.13 
 -10  -2   3   54.92    3.04 
 -10   2   3   45.21    2.98 
 -10   2   3   53.62    2.95 
  -9  -2   3   23.82    1.95 
  -9  -2   3   23.43    2.16 
  -9   2   3   21.27    2.06 
  -9   2   3   23.85    1.93 
  -8  -2   3   89.15    3.66 
  -8  -2   3   90.76    3.83 
  -8   2   3   86.19    3.47 
  -8   2   3   92.39    3.85 
  -7  -2   3    3.83    0.99 
  -7  -2   3    6.48    1.08 
  -7   2   3    2.42    0.83 
  -7   2   3    4.11    0.89 
  -6  -2   3  112.03    3.94 
  -6  -2   3  113.59    3.80 
  -6   2   3  105.73    3.54 
  -6   2   3  109.31    3.89 
  -5  -2   3    3.62    0.82 
   5  -2  -3    4.92    0.52 
  -5  -2   3    3.87    0.75 
  -5   2   3    4.68    0.74 
  -5   2   3    4.72    0.84 
  -4  -2   3   62.43    2.45 
   4  -2  -3   62.27    1.78 
  -4   2   3   61.03    2.11 
  -4   2   3   61.49    2.38 
  -3  -2   3   21.18    1.20 
  -3   2   3   18.58    1.18 
  -3   2   3   22.85    1.05 
  -2  -2   3  116.73    3.21 
  -2  -2   3  116.21    3.24 
  -2   2   3  118.42    3.23 
  -1  -2   3    0.79    0.30 
  -1   2   3    1.14    0.33 
   1   2  -3    0.39    0.26 
   0   2  -3  161.10    3.89 
  -1  -2  -3   92.05    2.18 
  -1   2  -3   90.53    2.51 
  -2  -2  -3   25.13    1.29 
  -2  -2  -3   28.95    0.99 
  -2   2  -3   29.71    1.29 
  -3  -2  -3  393.09    9.21 
  -3  -2  -3  398.83    8.61 
  -3   2  -3  382.22    9.02 
  -4  -2  -3  258.17    6.17 
  -4  -2  -3  269.12    6.88 
  -4   2  -3  260.50    6.58 
  -5  -2  -3   18.46    1.16 
  -5  -2  -3   20.70    1.55 
  -5   2  -3   19.61    1.35 
  -6  -2  -3   12.39    1.47 
  -6  -2  -3   10.91    1.04 
  -6   2  -3   10.84    1.19 
  -7  -2  -3    5.28    0.91 
  -7  -2  -3    5.83    1.21 
  -7   2  -3    6.18    1.05 
  -8  -2  -3    5.55    1.01 
  -8  -2  -3    3.00    1.13 
  -8   2  -3    5.81    1.18 
  -9  -2  -3    8.18    1.70 
  -9  -2  -3    7.62    1.27 
  -9   2  -3   10.09    1.53 
 -10  -2  -3   33.26    2.85 
 -10  -2  -3   30.95    2.22 
 -10   2  -3   29.84    2.36 
 -11  -2  -3    7.58    1.83 
 -11  -2  -3    8.93    1.55 
 -11   2  -3   11.03    1.78 
 -12  -2  -3   55.97    4.01 
 -12   2  -3   66.42    3.84 
 -13  -2  -3    4.31    1.91 
 -13   2  -3    2.94    1.48 
 -15   3   3    0.84    1.63 
 -14  -3   3   49.19    3.60 
 -14   3   3   43.47    3.78 
 -13  -3   3   -0.48    1.10 
 -13  -3   3   -1.09    1.38 
 -13   3   3   -1.03    1.18 
 -12  -3   3   76.65    4.04 
 -12  -3   3   78.96    4.52 
 -12   3   3   71.72    4.18 
 -11  -3   3    1.18    1.12 
 -11  -3   3    3.59    1.38 
 -11   3   3    0.70    1.15 
 -10  -3   3   65.80    3.67 
 -10  -3   3   62.71    3.26 
 -10   3   3   62.90    3.51 
 -10   3   3   61.03    3.10 
  -9  -3   3    7.28    1.35 
  -9  -3   3    6.42    1.42 
  -9   3   3    5.52    1.14 
  -9   3   3    5.80    1.33 
  -8  -3   3    0.77    0.75 
  -8  -3   3    1.02    0.84 
  -8   3   3    0.80    0.66 
  -8   3   3    0.97    0.83 
  -7  -3   3    1.04    0.67 
  -7  -3   3    1.11    0.76 
  -7   3   3    1.33    0.74 
  -7   3   3    1.23    0.63 
  -6  -3   3   76.17    2.94 
  -6  -3   3   73.03    3.11 
  -6   3   3   77.59    3.12 
  -6   3   3   72.26    2.68 
  -5  -3   3    0.73    0.49 
   5  -3  -3    0.78    0.36 
  -5  -3   3   -0.18    0.48 
  -5   3   3    0.70    0.43 
  -5   3   3    0.44    0.49 
  -4  -3   3  206.54    5.69 
  -4  -3   3  211.83    5.51 
   4  -3  -3  207.24    4.84 
  -4   3   3  209.72    5.12 
  -3  -3   3   31.93    1.48 
  -3  -3   3   30.74    1.56 
   3  -3  -3   32.56    1.20 
  -3   3   3   29.81    1.19 
  -3   3   3   28.13    1.45 
  -2  -3   3  503.15   11.13 
   2  -3  -3  505.89   10.54 
  -2  -3   3  499.98   11.17 
  -2   3   3  505.63   11.15 
  -1  -3   3  313.56    7.20 
   1   3  -3  323.68    7.21 
   0   3  -3  112.88    2.99 
   0   3   3  113.14    2.73 
  -1  -3  -3   -0.08    0.29 
  -1  -3  -3    0.14    0.15 
  -1   3  -3   -0.17    0.27 
  -2  -3  -3    0.32    0.19 
  -2  -3  -3   -0.04    0.32 
  -2   3  -3   -0.24    0.28 
  -3  -3  -3   10.75    1.01 
  -3  -3  -3    9.77    0.61 
  -3   3  -3    9.78    0.89 
  -4  -3  -3  121.36    3.89 
  -4  -3  -3  114.67    3.10 
  -4   3  -3  114.58    3.43 
  -4   3  -3  118.07    3.67 
  -5  -3  -3   29.83    1.86 
  -5  -3  -3   28.53    1.37 
  -5   3  -3   25.16    1.62 
  -5   3  -3   28.90    1.62 
  -6  -3  -3  138.26    3.99 
  -6  -3  -3  141.50    4.80 
  -6   3  -3  134.40    4.44 
  -6   3  -3  139.30    4.41 
  -7  -3  -3    0.17    0.52 
  -7  -3  -3   -0.08    0.70 
  -7   3  -3    0.09    0.60 
  -7   3  -3    0.10    0.63 
  -8  -3  -3  128.19    4.25 
  -8  -3  -3  134.65    5.15 
  -8   3  -3  131.76    4.70 
  -8   3  -3  124.87    4.60 
  -9  -3  -3    1.50    0.81 
  -9  -3  -3    1.15    1.12 
  -9   3  -3    0.92    1.07 
  -9   3  -3    1.64    0.92 
 -10  -3  -3   44.05    3.25 
 -10  -3  -3   44.48    2.57 
 -10   3  -3   48.12    2.92 
 -10   3  -3   38.06    2.75 
 -11  -3  -3    2.87    1.43 
 -11   3  -3    0.88    1.04 
 -12  -3  -3   -1.28    1.37 
 -12   3  -3    0.62    1.14 
 -13  -3  -3   -1.21    1.42 
 -13   3  -3   -0.01    1.24 
 -14   3  -3   13.85    2.42 
 -15   4   3    9.67    2.44 
 -14  -4   3    6.13    1.92 
 -14   4   3    8.52    2.14 
 -13  -4   3   -0.37    1.05 
 -13  -4   3   -1.25    1.31 
 -13   4   3   -1.98    1.14 
 -12  -4   3    3.44    1.65 
 -12  -4   3    3.78    1.36 
 -12   4   3    2.18    1.38 
 -11  -4   3    7.57    1.70 
 -11  -4   3    4.12    1.32 
 -11   4   3    3.18    1.32 
 -10  -4   3   32.79    2.67 
 -10  -4   3   29.55    2.32 
 -10   4   3   32.46    2.59 
  -9  -4   3   68.66    3.57 
  -9  -4   3   64.36    3.10 
  -9   4   3   58.91    2.82 
  -9   4   3   57.44    3.31 
  -8  -4   3   77.72    3.32 
  -8  -4   3   72.65    3.57 
  -8   4   3   79.06    3.62 
  -8   4   3   80.39    3.09 
  -7  -4   3  104.79    4.12 
  -7  -4   3  108.53    3.78 
  -7   4   3   98.11    3.37 
  -7   4   3   92.21    3.83 
  -6  -4   3   87.48    3.25 
  -6  -4   3   89.33    3.56 
   6  -4  -3   92.71    2.75 
  -6   4   3   87.07    2.93 
  -6   4   3   88.15    3.46 
  -5  -4   3  118.28    4.06 
   5  -4  -3  118.83    3.25 
  -5  -4   3  115.67    3.73 
  -5   4   3  119.61    3.37 
  -5   4   3  119.57    3.98 
   4  -4  -3   52.90    1.82 
  -4  -4   3   54.58    2.39 
  -4  -4   3   54.71    2.15 
  -4   4   3   55.82    1.83 
  -4   4   3   52.93    2.25 
  -3  -4   3    2.78    0.61 
   3  -4  -3    4.96    0.56 
  -3  -4   3    4.08    0.64 
  -3   4   3    4.92    0.72 
   2  -4  -3   57.17    1.80 
  -2  -4   3   61.28    2.14 
  -2   4   3   55.92    1.98 
   2   4  -3   60.65    1.99 
  -1  -4   3    1.53    0.41 
   1  -4  -3    1.63    0.39 
   1   4  -3    1.24    0.36 
   0  -4  -3   14.41    0.80 
   0   4   3   14.21    0.66 
   0   4  -3   13.86    0.85 
  -1  -4  -3   83.58    2.50 
  -1  -4  -3   82.13    1.89 
  -1   4  -3   79.22    2.47 
  -2  -4  -3  334.95    7.91 
  -2  -4  -3  336.63    7.17 
  -2   4  -3  325.10    7.37 
  -2   4  -3  332.43    7.84 
  -3  -4  -3    6.36    0.87 
  -3  -4  -3    7.21    0.48 
  -3   4  -3    6.64    0.82 
  -3   4  -3    7.13    0.66 
  -4  -4  -3   94.31    2.55 
  -4  -4  -3   91.88    3.34 
  -4   4  -3   95.81    3.23 
  -4   4  -3   92.10    2.88 
  -5  -4  -3   64.41    2.88 
  -5  -4  -3   62.84    2.10 
  -5   4  -3   64.43    2.67 
  -5   4  -3   64.29    2.47 
  -6  -4  -3   14.67    1.09 
  -6  -4  -3   16.36    1.67 
  -6   4  -3   15.75    1.46 
  -6   4  -3   16.48    1.39 
  -7  -4  -3   12.13    1.12 
  -7  -4  -3   11.98    1.62 
  -7   4  -3   11.40    1.34 
  -7   4  -3    9.01    1.31 
  -8  -4  -3    0.32    0.85 
  -8  -4  -3    0.41    0.59 
  -8   4  -3    0.14    0.76 
  -8   4  -3   -0.68    0.65 
  -9  -4  -3   -0.39    0.63 
  -9  -4  -3    0.01    1.04 
  -9   4  -3   -0.99    0.89 
  -9   4  -3    1.41    0.97 
 -10  -4  -3   33.28    2.21 
 -10  -4  -3   30.85    2.87 
 -10   4  -3   38.82    2.68 
 -11  -4  -3   40.93    3.25 
 -11   4  -3   37.05    2.80 
 -12  -4  -3   57.09    4.14 
 -12   4  -3   59.37    3.73 
 -13  -4  -3   41.43    3.93 
 -13   4  -3   51.74    3.70 
 -14  -4  -3   25.48    3.37 
 -14   4  -3   19.61    2.76 
 -15  -4  -3   16.42    3.15 
 -15  -5   3   18.08    3.08 
 -15   5   3   21.41    3.13 
 -14  -5   3    1.97    1.88 
 -14   5   3    2.33    1.65 
 -13  -5   3   53.82    4.05 
 -13   5   3   47.98    3.71 
 -12  -5   3    2.12    1.18 
 -12  -5   3    0.73    1.34 
 -12   5   3    2.70    1.35 
 -11  -5   3   72.68    3.72 
 -11  -5   3   80.09    4.43 
 -11   5   3   74.41    4.18 
 -10  -5   3    1.63    1.18 
 -10  -5   3    0.86    0.82 
 -10   5   3   -0.55    0.94 
  -9  -5   3   32.01    2.62 
  -9  -5   3   31.84    2.22 
  -9   5   3   30.83    2.42 
  -8  -5   3    2.18    0.83 
  -8  -5   3    1.02    0.88 
  -8   5   3    0.66    0.82 
  -8   5   3    0.39    0.60 
  -7  -5   3    1.27    0.79 
  -7  -5   3    1.92    0.73 
  -7   5   3    2.10    0.82 
  -7   5   3    1.21    0.60 
  -6  -5   3    5.57    1.15 
  -6  -5   3    3.60    0.84 
   6  -5  -3    4.54    0.70 
  -6   5   3    3.06    0.87 
  -6   5   3    4.70    0.72 
  -5  -5   3  142.01    4.28 
   5  -5  -3  148.19    3.89 
  -5  -5   3  142.96    4.69 
  -5   5   3  137.21    4.52 
  -5   5   3  142.62    3.77 
  -4  -5   3    8.12    0.90 
   4  -5  -3    8.22    0.78 
  -4  -5   3    7.51    1.05 
  -4   5   3    7.20    0.61 
  -4   5   3    8.62    1.01 
  -3  -5   3  216.78    5.58 
   3  -5  -3  231.18    5.36 
  -3  -5   3  223.28    5.91 
  -3   5   3  217.22    5.72 
  -2  -5   3    1.98    0.52 
   2  -5  -3    1.26    0.38 
   2   5  -3    1.27    0.39 
  -2   5   3    1.55    0.44 
  -1  -5   3  280.15    6.11 
  -1  -5   3  275.92    6.55 
   1  -5  -3  284.72    6.37 
   1   5  -3  271.00    6.48 
   0  -5   3    2.46    0.46 
   0  -5  -3    1.95    0.40 
   0   5  -3    2.38    0.47 
   0   5   3    2.53    0.33 
  -1  -5  -3   58.10    2.02 
   1  -5   3   59.33    1.96 
   1   5   3   57.64    1.41 
  -1   5  -3   59.29    2.07 
  -2  -5  -3    0.17    0.36 
  -2   5  -3    0.07    0.34 
  -3  -5  -3    1.76    0.61 
  -3  -5  -3    1.69    0.25 
  -3   5  -3    1.53    0.55 
  -3   5  -3    0.92    0.37 
  -4  -5  -3   -0.23    0.23 
  -4  -5  -3    0.40    0.52 
  -4   5  -3   -0.22    0.34 
  -4   5  -3   -0.01    0.44 
  -5  -5  -3   49.78    2.63 
  -5  -5  -3   58.06    1.90 
  -5   5  -3   58.46    2.26 
  -5   5  -3   55.55    2.55 
  -6  -5  -3    3.43    0.63 
  -6  -5  -3    2.82    0.95 
  -6   5  -3    4.21    0.85 
  -6   5  -3    2.37    0.81 
  -7  -5  -3  122.21    4.74 
  -7  -5  -3  122.85    3.74 
  -7   5  -3  120.57    4.44 
  -7   5  -3  121.91    4.10 
  -8  -5  -3    1.17    0.96 
  -8  -5  -3    0.79    0.60 
  -8   5  -3    0.29    0.73 
  -8   5  -3    0.05    0.73 
  -9  -5  -3  130.77    5.46 
  -9  -5  -3  122.79    4.23 
  -9   5  -3  123.09    4.62 
  -9   5  -3  130.77    5.02 
 -10  -5  -3    3.24    1.27 
 -10   5  -3    3.59    1.29 
 -11  -5  -3   16.30    2.49 
 -11   5  -3   14.89    2.08 
 -12  -5  -3   -0.67    1.29 
 -12   5  -3    1.05    1.23 
 -13  -5  -3    4.21    1.98 
 -13   5  -3    2.11    1.43 
 -14  -5  -3    1.91    1.98 
 -14   5  -3    0.98    1.60 
 -14  -6   3    2.36    1.81 
 -14   6   3    2.69    1.73 
 -13  -6   3    8.34    2.27 
 -13   6   3    5.85    1.92 
 -12  -6   3    0.99    1.06 
 -12  -6   3   -0.05    1.25 
 -12   6   3   -0.10    1.25 
 -11  -6   3    7.03    1.48 
 -11  -6   3    7.72    1.80 
 -11   6   3    8.24    1.85 
 -10  -6   3    2.99    1.30 
 -10  -6   3    3.78    1.12 
 -10   6   3    1.30    1.08 
  -9  -6   3  119.48    4.43 
  -9  -6   3  118.31    5.09 
  -9   6   3  111.72    4.80 
  -8  -6   3    5.01    1.09 
  -8   6   3    3.96    1.19 
  -7  -6   3  212.66    6.75 
   7  -6  -3  213.45    5.55 
  -7  -6   3  213.94    6.15 
  -7   6   3  211.42    6.63 
  -7   6   3  209.45    5.53 
  -6  -6   3    5.59    1.15 
  -6  -6   3    5.95    0.96 
   6  -6  -3    6.77    0.85 
  -6   6   3    6.89    0.76 
  -6   6   3    4.82    1.02 
  -5  -6   3  114.88    3.60 
  -5  -6   3  100.85    3.88 
   5  -6  -3  114.32    3.31 
  -5   6   3  103.79    3.77 
  -5   6   3  107.39    2.96 
   4  -6  -3    2.70    0.60 
  -4  -6   3    2.24    0.70 
  -4  -6   3    2.82    0.65 
  -4   6   3    3.34    0.76 
  -3  -6   3    1.23    0.54 
   3  -6  -3    1.09    0.44 
  -3   6   3    0.74    0.49 
  -2  -6   3    0.05    0.26 
  -2  -6   3    0.43    0.41 
   2  -6  -3    1.00    0.39 
  -2   6   3   -0.42    0.32 
   2   6  -3    0.17    0.32 
   1  -6  -3  399.95    8.82 
  -1  -6   3  395.22    9.05 
   1   6  -3  393.76    8.99 
   0  -6   3   80.50    2.38 
   0  -6   3   82.15    2.39 
   0  -6  -3   79.34    2.38 
   0   6  -3   77.14    2.50 
   0   6   3   80.45    2.13 
  -1  -6  -3  459.70   10.35 
  -1   6  -3  447.69   10.41 
   1   6   3  467.00    9.77 
   2  -6   3   18.38    1.14 
  -2  -6  -3   18.90    1.25 
  -2   6  -3   17.00    1.19 
  -3  -6  -3  252.24    5.34 
  -3  -6  -3  244.44    6.52 
  -3   6  -3  248.15    5.73 
  -3   6  -3  236.15    6.42 
  -4  -6  -3   64.91    2.80 
  -4  -6  -3   67.88    1.85 
  -4   6  -3   67.77    2.73 
  -4   6  -3   64.40    2.21 
  -5  -6  -3   79.82    3.34 
  -5  -6  -3   79.07    2.32 
  -5   6  -3   73.94    3.11 
  -5   6  -3   79.20    2.68 
  -6  -6  -3    7.45    0.77 
  -6  -6  -3    6.39    1.25 
  -6   6  -3   10.48    1.37 
  -6   6  -3    6.76    0.95 
  -7  -6  -3    1.59    0.90 
  -7  -6  -3    4.68    0.76 
  -7   6  -3    4.50    0.94 
  -7   6  -3    5.07    1.20 
  -8  -6  -3   -0.01    0.85 
  -8  -6  -3   -0.07    0.58 
  -8   6  -3    0.80    0.72 
  -8   6  -3    0.46    0.80 
  -9  -6  -3   12.00    2.01 
  -9   6  -3   11.54    1.78 
 -10  -6  -3    1.20    1.23 
 -10   6  -3    1.69    1.07 
 -11  -6  -3   48.35    3.71 
 -11   6  -3   46.38    3.28 
 -12  -6  -3    2.95    1.60 
 -12   6  -3    6.25    1.75 
 -13  -6  -3   75.72    4.93 
 -13   6  -3   76.09    4.52 
 -14  -6  -3    3.52    2.29 
 -14   6  -3    4.48    1.80 
 -14  -7   3   27.62    3.72 
 -14   7   3   25.50    3.32 
 -13  -7   3   20.88    3.10 
 -13   7   3   23.18    3.04 
 -12  -7   3   51.28    3.97 
 -12   7   3   47.43    3.59 
 -11  -7   3   21.66    2.14 
 -11  -7   3   26.32    2.88 
 -11   7   3   19.28    2.51 
 -10  -7   3   32.67    2.36 
 -10  -7   3   25.71    2.74 
 -10   7   3   32.07    2.81 
  -9  -7   3   29.97    2.70 
  -9  -7   3   28.02    2.11 
  -9   7   3   31.80    2.68 
  -8  -7   3   -0.34    0.65 
  -8  -7   3    0.25    0.86 
  -8   7   3    0.65    0.81 
  -7  -7   3    7.18    1.12 
  -7  -7   3    5.89    1.29 
   7  -7  -3    9.50    1.06 
  -7   7   3    6.41    1.26 
  -6  -7   3    3.08    0.95 
   6  -7  -3    3.40    0.72 
  -6  -7   3    2.97    0.79 
  -6   7   3    5.75    0.65 
  -6   7   3    4.31    1.02 
  -5  -7   3   76.86    2.84 
  -5  -7   3   77.18    3.29 
   5  -7  -3   79.46    2.70 
  -5   7   3   74.53    3.10 
   4  -7  -3  129.03    3.74 
  -4  -7   3  131.01    3.18 
  -4  -7   3  128.46    4.27 
  -4   7   3  122.03    4.06 
   3  -7  -3  190.83    5.08 
  -3  -7   3  212.53    4.69 
  -3  -7   3  199.97    5.61 
  -3   7   3  190.83    5.36 
  -2  -7   3  130.57    3.86 
  -2  -7   3  127.12    3.27 
   2  -7  -3  125.80    3.57 
  -2   7   3  121.24    3.59 
  -1  -7   3  169.35    4.55 
   1  -7  -3  174.02    4.49 
   1   7  -3  174.99    4.53 
  -1   7   3  169.86    4.33 
   0  -7   3  111.72    3.06 
   0  -7   3  110.34    3.11 
   0  -7  -3  109.58    3.06 
   0  -7  -3  108.51    3.18 
   0   7  -3  104.93    3.22 
   0   7   3  107.72    2.78 
  -1  -7  -3   26.01    1.37 
   1  -7   3   26.33    1.33 
  -1   7  -3   25.96    1.41 
   1   7   3   25.12    0.81 
   2  -7   3    0.61    0.42 
  -2  -7  -3    0.84    0.49 
  -2   7  -3    0.05    0.40 
  -3  -7  -3   14.34    1.30 
  -3   7  -3   16.45    0.89 
  -3   7  -3   17.37    1.32 
  -4  -7  -3   30.90    1.04 
  -4   7  -3   29.51    1.82 
  -4   7  -3   31.06    1.37 
  -5  -7  -3   25.14    1.93 
  -5  -7  -3   27.41    1.15 
  -5   7  -3   29.53    1.49 
  -5   7  -3   29.59    1.88 
  -6  -7  -3   33.88    1.48 
  -6  -7  -3   35.11    2.37 
  -6   7  -3   32.65    2.12 
  -6   7  -3   32.38    1.73 
  -7  -7  -3   28.82    1.51 
  -7  -7  -3   24.65    2.26 
  -7   7  -3   30.13    2.21 
  -7   7  -3   26.61    1.70 
  -8  -7  -3   84.93    4.12 
  -8   7  -3   74.40    3.63 
  -9  -7  -3   84.08    4.33 
  -9   7  -3   74.42    3.81 
 -10  -7  -3   51.69    3.58 
 -10   7  -3   47.20    3.22 
 -11  -7  -3   18.08    2.64 
 -11   7  -3   16.76    2.35 
 -12  -7  -3   -0.82    1.31 
 -12   7  -3    0.06    1.24 
 -13  -7  -3    0.65    1.59 
 -13   7  -3    1.35    1.47 
 -14  -7  -3    0.11    1.69 
 -14   7  -3    2.09    1.63 
 -14  -8   3   10.23    2.57 
 -14   8   3    9.47    2.43 
 -13  -8   3   -0.74    1.41 
 -13   8   3    1.30    1.45 
 -12  -8   3    3.96    1.76 
 -12   8   3    1.97    1.44 
 -11  -8   3    3.34    1.20 
 -11  -8   3    2.58    1.37 
 -11   8   3    4.54    1.55 
 -10  -8   3   34.64    2.41 
 -10  -8   3   32.91    3.04 
 -10   8   3   34.71    2.82 
  -9  -8   3    4.85    1.46 
  -9  -8   3    1.47    0.88 
  -9   8   3    3.61    1.28 
  -8  -8   3  117.43    4.26 
  -8  -8   3  118.37    4.99 
   8  -8  -3  119.68    3.94 
  -8   8   3  118.84    4.85 
  -7  -8   3    9.96    1.61 
   7  -8  -3    9.43    1.15 
  -7  -8   3   12.26    1.32 
  -7   8   3   10.12    1.50 
  -6  -8   3  110.99    4.39 
  -6  -8   3  115.59    3.84 
   6  -8  -3  117.51    3.72 
  -6   8   3  109.89    4.22 
  -5  -8   3    2.22    0.77 
   5  -8  -3    2.24    0.67 
  -5  -8   3    2.20    0.66 
  -5  -8   3    3.17    0.48 
  -5   8   3    2.50    0.81 
   4  -8  -3   19.20    1.33 
  -4  -8   3   17.14    1.55 
  -4  -8   3   19.18    1.00 
  -4   8   3   20.16    1.48 
   3  -8  -3   32.58    1.67 
  -3  -8   3   34.20    1.38 
  -3  -8   3   32.76    1.87 
  -3   8   3   32.12    1.72 
  -2  -8   3    4.27    0.78 
  -2  -8   3    4.11    0.60 
   2  -8  -3    3.38    0.68 
  -1  -8   3   67.28    2.40 
   1  -8  -3   67.31    2.04 
   1  -8  -3   63.55    2.36 
  -1   8   3   70.35    2.25 
   1   8  -3   66.54    2.35 
   0  -8  -3  108.07    3.31 
   0  -8  -3  113.57    3.17 
   0  -8   3  115.19    3.29 
   0  -8   3  107.98    3.12 
   0   8  -3  112.97    3.40 
   0   8   3  106.69    2.88 
  -1  -8  -3    3.48    0.65 
   1  -8   3    4.84    0.74 
  -1   8  -3    5.64    0.81 
   1   8   3    4.18    0.37 
  -2  -8  -3  337.44    8.17 
   2  -8   3  329.24    7.86 
  -2   8  -3  316.46    8.15 
   3  -8   3   26.97    1.57 
  -3  -8  -3   26.63    1.74 
  -3   8  -3   28.11    1.16 
  -3   8  -3   28.90    1.74 
  -4  -8  -3  238.78    6.81 
  -4   8  -3  237.36    6.74 
  -4   8  -3  239.76    5.67 
  -5  -8  -3    5.95    0.55 
  -5  -8  -3    5.94    1.24 
  -5   8  -3    5.54    1.10 
  -5   8  -3    5.10    0.72 
  -6  -8  -3   21.71    2.01 
  -6  -8  -3   18.80    1.08 
  -6   8  -3   21.34    1.37 
  -6   8  -3   23.00    1.83 
  -7  -8  -3   -0.56    0.76 
  -7   8  -3    0.50    0.76 
  -8  -8  -3   10.80    1.88 
  -8   8  -3   11.98    1.73 
  -9  -8  -3    2.35    1.34 
  -9   8  -3    3.13    1.22 
 -10  -8  -3   48.89    3.69 
 -10   8  -3   46.03    3.23 
 -11  -8  -3    3.04    1.60 
 -11   8  -3    1.66    1.31 
 -12  -8  -3   54.91    4.14 
 -12   8  -3   53.28    3.77 
 -13  -8  -3    2.57    1.79 
 -13   8  -3   -0.19    1.34 
 -14  -8  -3   46.95    4.54 
 -14   8  -3   49.48    3.96 
 -14  -9   3   33.02    3.97 
 -14   9   3   35.19    3.84 
 -13  -9   3   20.17    3.21 
 -13   9   3   12.90    2.56 
 -12  -9   3   55.72    4.18 
 -12   9   3   66.08    4.27 
 -11  -9   3    2.81    1.44 
 -11   9   3    4.44    1.56 
 -10  -9   3   33.40    2.35 
 -10  -9   3   31.12    3.06 
 -10   9   3   35.81    2.93 
  -9  -9   3    3.95    1.06 
  -9  -9   3    4.21    1.50 
  -9   9   3    2.63    1.28 
   8  -9  -3    0.66    0.70 
  -8  -9   3    0.17    0.98 
  -8  -9   3    2.64    0.91 
  -8   9   3    0.79    0.92 
  -7  -9   3    0.21    0.81 
   7  -9  -3    0.76    0.68 
  -7  -9   3    0.50    0.65 
  -7   9   3    0.57    0.82 
   6  -9  -3   20.23    1.51 
  -6  -9   3   18.87    1.93 
  -6  -9   3   20.56    1.49 
  -6   9   3   19.37    1.85 
  -5  -9   3    9.54    0.78 
   5  -9  -3    9.33    1.09 
  -5  -9   3    7.36    1.31 
  -5   9   3    7.75    1.21 
  -4  -9   3   98.73    2.76 
  -4  -9   3   97.02    3.69 
   4  -9  -3   86.57    3.16 
  -4   9   3   91.98    3.46 
  -3  -9   3   17.04    1.06 
  -3  -9   3   15.37    1.41 
   3  -9  -3   17.82    1.31 
  -3   9   3   16.84    1.29 
  -2  -9   3  303.43    7.77 
   2  -9  -3  301.20    7.48 
  -2  -9   3  319.19    7.18 
   1  -9  -3    1.90    0.56 
   1  -9  -3    1.81    0.43 
  -1  -9   3    2.07    0.55 
   1   9  -3    1.57    0.52 
  -1   9   3    1.43    0.48 
   0  -9  -3   89.01    3.00 
   0  -9   3   88.67    2.91 
   0  -9   3   89.82    2.77 
   0  -9  -3   92.34    2.81 
   0   9  -3   88.11    2.99 
   0   9   3   90.24    2.56 
  -1  -9  -3   60.98    2.34 
   1  -9   3   56.00    2.29 
  -1  -9  -3   60.88    2.32 
   1   9   3   59.94    1.68 
  -1   9  -3   59.49    2.41 
  -2  -9  -3   18.48    1.36 
   2  -9   3   16.43    1.24 
  -2   9  -3   12.63    1.24 
  -3  -9  -3    6.41    1.05 
   3  -9   3    5.88    0.92 
  -3   9  -3    7.16    1.13 
   4  -9   3   70.39    2.84 
  -4  -9  -3   69.51    3.09 
  -4   9  -3   66.21    2.98 
   4   9   3   69.46    1.72 
  -4   9  -3   69.85    2.15 
  -5  -9  -3   15.69    1.68 
  -5  -9  -3   14.29    0.78 
  -5   9  -3   16.53    1.08 
  -5   9  -3   12.05    1.46 
  -6  -9  -3   69.60    2.18 
  -6  -9  -3   68.36    3.46 
  -6   9  -3   69.32    3.28 
  -7  -9  -3   30.94    2.59 
  -7   9  -3   27.89    2.26 
  -8  -9  -3  121.25    5.18 
  -8   9  -3  110.84    4.72 
  -9  -9  -3   15.19    2.31 
  -9   9  -3   14.61    2.01 
 -10  -9  -3   41.53    3.38 
 -10   9  -3   44.20    3.13 
 -11  -9  -3    0.25    1.33 
 -11   9  -3    0.29    1.11 
 -12  -9  -3   -1.63    1.37 
 -12   9  -3   -0.63    1.20 
 -13  -9  -3   -0.68    1.41 
 -13   9  -3   -1.08    1.16 
 -14  -9  -3   11.41    2.77 
 -14   9  -3    8.36    2.22 
 -14 -10   3    2.83    2.08 
 -14  10   3    1.85    1.74 
 -13 -10   3    0.91    1.66 
 -13  10   3   -0.65    1.49 
 -12 -10   3    1.96    1.54 
 -12  10   3    3.51    1.73 
 -11 -10   3   20.26    2.89 
 -11  10   3   23.02    2.79 
 -10 -10   3    2.21    1.42 
 -10  10   3    3.45    1.40 
  -9 -10   3   65.79    3.98 
  -9 -10   3   72.30    3.29 
  -9  10   3   73.07    4.01 
  -8 -10   3   33.49    2.17 
  -8 -10   3   34.95    2.74 
   8 -10  -3   32.59    2.13 
  -8  10   3   33.28    2.64 
  -7 -10   3   56.93    3.27 
  -7 -10   3   54.75    2.59 
   7 -10  -3   54.82    2.59 
  -7  10   3   55.14    3.16 
  -6 -10   3   36.19    2.47 
   6 -10  -3   30.66    1.93 
  -6  10   3   33.81    2.30 
   6  10  -3   38.92    2.01 
  -5 -10   3   33.61    2.26 
   5 -10  -3   32.98    1.91 
  -5 -10   3   35.07    1.54 
   5  10  -3   33.27    1.77 
  -5  10   3   34.50    2.17 
  -4 -10   3    2.47    0.57 
   4 -10  -3    1.75    0.66 
  -4 -10   3    1.97    0.78 
   4  10  -3    1.85    0.58 
  -4  10   3    1.08    0.63 
  -3 -10   3   42.94    1.78 
  -3 -10   3   42.17    2.23 
   3 -10  -3   38.74    2.01 
  -3  10   3   40.65    2.05 
  -2 -10   3    4.35    0.84 
   2 -10  -3    4.81    0.83 
   1 -10  -3   34.64    1.42 
  -1 -10   3   35.87    1.69 
  -1 -10   3   34.50    1.73 
   1 -10  -3   34.27    1.82 
  -1  10   3   36.89    1.62 
   1  10  -3   35.99    1.75 
   0 -10   3   52.39    2.19 
   0 -10  -3   50.82    2.21 
   0 -10  -3   56.81    2.06 
   0 -10   3   50.23    1.99 
   0  10  -3   53.07    2.25 
   0  10   3   54.38    1.86 
  -1 -10  -3  141.43    4.26 
   1 -10   3  146.69    4.33 
  -1 -10  -3  149.00    4.29 
   1  10   3  149.33    3.58 
  -1  10  -3  146.38    4.45 
  -2 -10  -3   34.64    1.78 
   2 -10   3   33.08    1.79 
  -2 -10  -3   34.43    1.85 
  -2  10  -3   34.22    1.95 
   2  10   3   32.68    1.01 
  -3 -10  -3  245.50    6.68 
   3 -10   3  231.41    6.32 
  -3  10  -3  228.12    6.61 
  -4 -10  -3   63.68    2.98 
   4 -10   3   60.30    2.67 
  -4  10  -3   60.19    2.89 
  -4  10  -3   63.51    1.97 
  -5 -10  -3  132.90    4.88 
  -5  10  -3  137.66    4.83 
  -6 -10  -3    2.14    0.95 
  -6  10  -3    1.03    0.75 
  -7 -10  -3    0.30    0.83 
  -7  10  -3    1.37    0.88 
  -8 -10  -3   22.67    2.48 
  -8  10  -3   27.00    2.46 
  -9 -10  -3   13.11    2.14 
  -9  10  -3    7.31    1.61 
 -10 -10  -3   14.23    2.35 
 -10  10  -3   14.93    2.24 
 -11 -10  -3   44.15    3.85 
 -11  10  -3   42.16    3.39 
 -12 -10  -3   13.46    2.74 
 -12  10  -3   15.04    2.45 
 -13 -10  -3   35.05    3.85 
 -13  10  -3   28.84    3.33 
 -14 -10  -3    4.10    2.05 
 -14  10  -3    2.05    1.73 
 -14 -11   3   -0.23    1.80 
 -13 -11   3   55.24    4.50 
 -13  11   3   56.22    4.32 
 -12 -11   3   -1.94    1.22 
 -12  11   3    0.32    1.41 
 -11 -11   3   45.36    3.70 
 -11  11   3   48.49    3.73 
 -10 -11   3    0.38    1.19 
 -10  11   3    0.28    1.02 
  -9 -11   3   10.97    2.05 
   9 -11  -3   12.11    1.56 
  -9  11   3    9.28    1.75 
   8 -11  -3    8.61    1.35 
  -8 -11   3    7.63    1.65 
  -8  11   3    7.91    1.64 
   8  11  -3    9.14    1.31 
   7 -11  -3    8.54    1.28 
  -7 -11   3    9.10    1.72 
   7  11  -3   11.06    1.29 
  -7  11   3    9.48    1.66 
   6 -11  -3    3.99    0.91 
  -6 -11   3    4.92    1.22 
  -6  11   3    6.61    1.29 
   6  11  -3    4.44    0.93 
   5 -11  -3   49.45    2.41 
  -5 -11   3   51.84    1.99 
  -5 -11   3   46.07    2.70 
  -5  11   3   50.31    2.69 
   5  11  -3   51.46    2.24 
  -4 -11   3   -0.63    0.49 
  -4 -11   3    0.32    0.45 
   4 -11  -3   -0.32    0.47 
  -4  11   3   -0.20    0.56 
   4  11  -3   -0.13    0.45 
  -3 -11   3  288.24    6.79 
  -3 -11   3  271.49    7.56 
   3 -11  -3  275.23    7.20 
   3  11  -3  263.47    6.91 
  -3  11   3  281.22    7.39 
   2 -11  -3    1.49    0.62 
  -2 -11   3    1.47    0.67 
   1 -11  -3  195.03    4.85 
   1 -11  -3  191.79    5.39 
  -1 -11   3  196.84    5.35 
  -1 -11   3  194.41    5.23 
  -1  11   3  189.68    5.09 
   0 -11  -3    1.15    0.49 
   0 -11   3    1.74    0.54 
   0 -11  -3    1.66    0.61 
   0 -11   3    0.89    0.52 
   0  11   3    1.77    0.51 
   0  11  -3    1.95    0.66 
   1 -11   3   54.03    2.41 
  -1 -11  -3   56.33    2.35 
  -1 -11  -3   57.78    2.44 
  -1  11  -3   59.24    2.57 
   1  11   3   59.24    1.84 
  -2 -11  -3   20.86    1.50 
  -2 -11  -3   20.18    1.54 
   2 -11   3   20.45    1.49 
  -2  11  -3   20.67    1.63 
   2  11   3   21.79    0.85 
   3 -11   3    6.97    1.08 
  -3 -11  -3    9.56    1.11 
  -3 -11  -3    9.86    1.27 
  -3  11  -3   11.24    1.35 
  -4 -11  -3    1.87    0.80 
   4 -11   3    0.78    0.62 
  -4  11  -3    2.37    0.84 
  -4  11  -3    1.30    0.42 
  -5 -11  -3   79.87    3.65 
  -5  11  -3   81.93    3.59 
  -6 -11  -3    0.94    0.91 
  -6  11  -3    1.07    0.89 
  -7 -11  -3  149.47    5.89 
  -7  11  -3  164.99    5.89 
  -8 -11  -3    0.78    1.08 
  -8  11  -3    1.34    1.06 
  -9 -11  -3   62.17    3.97 
  -9  11  -3   56.02    3.48 
 -10 -11  -3   -0.54    1.14 
 -10  11  -3   -0.45    1.08 
 -11 -11  -3    8.72    2.20 
 -11  11  -3   13.06    2.32 
 -12 -11  -3   -2.72    1.32 
 -12  11  -3    0.76    1.37 
 -13 -11  -3    2.62    1.94 
 -13  11  -3    5.68    2.03 
 -14 -11  -3   -1.95    1.53 
 -14  11  -3    0.57    1.70 
 -14 -12   3   -1.87    1.41 
 -13 -12   3    4.33    1.95 
 -13  12   3    0.44    1.59 
 -12 -12   3   -0.55    1.60 
 -12  12   3   -0.51    1.34 
 -11 -12   3   16.99    2.86 
 -11  12   3   20.08    2.82 
 -10 -12   3   12.72    2.37 
 -10  12   3   13.36    2.35 
   9 -12  -3   52.66    2.95 
  -9 -12   3   66.48    4.02 
  -9  12   3   59.55    3.68 
  -8 -12   3   37.84    3.02 
   8 -12  -3   38.49    2.41 
  -8  12   3   31.71    2.79 
   8  12  -3   41.79    2.34 
  -7 -12   3  123.12    5.23 
   7 -12  -3  125.40    4.50 
   7  12  -3  129.16    4.30 
  -7  12   3  135.73    5.28 
   6 -12  -3   56.98    2.72 
  -6 -12   3   48.85    3.03 
  -6  12   3   58.18    3.18 
   6  12  -3   56.74    2.51 
  -5 -12   3   33.62    2.36 
   5 -12  -3   30.80    1.99 
  -5 -12   3   30.69    1.61 
   5  12  -3   28.80    1.69 
  -5  12   3   30.31    2.14 
   4 -12  -3    5.78    1.09 
  -4 -12   3    7.73    0.92 
  -4 -12   3    6.96    1.29 
  -4  12   3    5.68    1.11 
   4  12  -3    8.39    0.99 
  -3 -12   3    7.37    1.21 
   3 -12  -3    5.26    0.99 
  -3 -12   3    9.50    1.03 
   3  12  -3    9.88    1.05 
  -3  12   3    8.73    1.18 
  -2 -12   3    0.58    0.53 
   2 -12  -3    0.74    0.55 
   1 -12  -3   38.09    2.04 
  -1 -12   3   35.34    1.88 
  -1 -12   3   41.62    1.98 
   1 -12  -3   37.74    1.60 
  -1  12   3   37.03    1.79 
   0 -12   3   33.25    1.87 
   0 -12   3   32.98    1.67 
   0 -12  -3   31.92    1.92 
   0 -12  -3   33.20    1.65 
   0  12   3   33.41    1.54 
   0  12  -3   34.54    1.91 
  -1 -12  -3   47.53    2.20 
   1 -12   3   50.50    2.36 
  -1 -12  -3   50.02    2.37 
  -1  12  -3   53.38    2.45 
   1  12   3   51.26    1.76 
   2 -12   3   45.59    2.31 
  -2 -12  -3   43.34    2.22 
  -2 -12  -3   46.44    2.31 
  -2  12  -3   48.24    2.50 
   2  12   3   49.62    1.51 
  -3 -12  -3  226.79    6.21 
  -3 -12  -3  233.70    6.67 
   3 -12   3  225.53    6.44 
  -3  12  -3  225.98    6.70 
   4 -12   3   21.16    1.70 
  -4 -12  -3   21.15    1.92 
  -4  12  -3   23.82    1.94 
  -5 -12  -3   33.14    2.35 
   5 -12   3   30.40    2.06 
  -5  12  -3   34.59    2.33 
  -6 -12  -3   13.57    1.88 
  -6  12  -3    7.98    1.47 
  -7 -12  -3   -0.16    0.92 
  -7  12  -3    1.52    0.96 
  -8 -12  -3    0.66    1.10 
  -8  12  -3    0.83    0.94 
  -9 -12  -3   49.14    3.54 
  -9  12  -3   43.73    3.21 
 -10 -12  -3   19.92    2.78 
 -10  12  -3   22.85    2.71 
 -11 -12  -3   49.13    4.01 
 -11  12  -3   42.37    3.44 
 -12 -12  -3   16.32    2.89 
 -12  12  -3   25.48    3.11 
 -13 -12  -3   17.18    3.08 
 -13  12  -3   24.08    3.20 
 -13 -13   3    7.79    2.52 
 -13  13   3    8.20    2.45 
 -12 -13   3   44.30    4.24 
 -12  13   3   40.01    3.85 
 -11 -13   3   19.86    3.00 
 -11  13   3   15.92    2.73 
 -10 -13   3   49.12    3.81 
 -10  13   3   50.90    3.63 
  -9 -13   3    0.97    1.20 
   9 -13  -3    1.32    0.97 
  -9  13   3    2.10    1.37 
  -8 -13   3    1.45    1.12 
   8 -13  -3    0.00    0.78 
  -8  13   3   -0.50    0.99 
  -7 -13   3    0.41    0.94 
   7 -13  -3   -0.52    0.65 
   7  13  -3   -0.47    0.64 
  -7  13   3    0.44    1.01 
  -6 -13   3   39.94    2.78 
   6 -13  -3   44.45    2.47 
  -6  13   3   46.62    2.84 
   6  13  -3   43.28    2.20 
  -5 -13   3    2.35    1.03 
  -5 -13   3    2.48    0.72 
   5 -13  -3    1.84    0.81 
  -5  13   3    2.97    1.03 
   5  13  -3    3.26    0.80 
  -4 -13   3   86.95    3.04 
  -4 -13   3   86.88    3.77 
   4 -13  -3   83.47    3.42 
  -4  13   3   84.07    3.58 
   4  13  -3   85.54    3.10 
  -3 -13   3   16.65    1.66 
   3 -13  -3   14.91    1.48 
  -3 -13   3   16.95    1.35 
  -3  13   3   12.49    1.39 
   3  13  -3   15.97    1.30 
   2 -13  -3  249.94    6.88 
  -2 -13   3  248.66    6.94 
   1 -13  -3   13.76    1.02 
  -1 -13   3   11.25    1.20 
  -1 -13   3   13.56    1.30 
   1 -13  -3   12.23    1.35 
  -1  13   3   11.81    1.12 
   0 -13  -3  169.68    5.13 
   0 -13   3  172.45    5.11 
   0 -13  -3  165.12    4.70 
   0 -13   3  173.73    4.79 
   0  13  -3  173.24    5.17 
   0  13   3  169.14    4.59 
  -1 -13  -3    7.35    1.01 
  -1 -13  -3    4.04    0.90 
   1 -13   3    3.66    0.88 
   1  13   3    7.11    0.71 
  -1  13  -3    6.94    1.12 
  -2 -13  -3    6.92    1.10 
   2 -13   3    5.60    1.07 
  -2 -13  -3    8.20    1.18 
  -2  13  -3    6.10    1.14 
   2  13   3    5.66    0.56 
   3 -13   3    0.31    0.64 
  -3 -13  -3    0.15    0.63 
  -3 -13  -3    0.47    0.62 
  -3  13  -3    0.45    0.73 
  -4 -13  -3   14.11    1.66 
  -4 -13  -3   15.91    1.48 
   4 -13   3   14.80    1.59 
  -4  13  -3   12.94    1.63 
  -5 -13  -3   37.75    2.15 
  -5 -13  -3   29.68    2.33 
   5 -13   3   35.92    2.28 
  -5  13  -3   33.87    2.40 
  -6 -13  -3  110.08    4.78 
  -6  13  -3  109.66    4.63 
  -7 -13  -3   15.28    2.15 
  -7  13  -3   15.97    2.09 
  -8 -13  -3   99.04    4.84 
  -8  13  -3   91.32    4.53 
  -9 -13  -3    1.73    1.36 
  -9  13  -3    4.71    1.52 
 -10 -13  -3   59.46    4.16 
 -10  13  -3   56.96    3.88 
 -11 -13  -3    1.06    1.48 
 -11  13  -3    1.21    1.44 
 -12 -13  -3    4.05    1.98 
 -12  13  -3    7.22    2.04 
 -13 -13  -3   -0.55    1.69 
 -13  13  -3    2.06    1.64 
 -13 -14   3    1.39    1.90 
 -13  14   3    3.01    2.02 
 -12 -14   3   -1.02    1.41 
 -12  14   3   -1.72    1.21 
 -11 -14   3   -0.47    1.39 
 -11  14   3    2.14    1.63 
 -10 -14   3   23.88    3.02 
 -10  14   3   22.36    2.84 
  -9 -14   3   -0.54    1.06 
   9 -14  -3    1.49    1.04 
  -9  14   3    0.53    1.15 
   8 -14  -3  107.63    4.30 
  -8 -14   3   98.31    4.92 
  -8  14   3  102.80    4.95 
   7 -14  -3    4.12    1.14 
  -7 -14   3    4.93    1.45 
  -7  14   3    5.37    1.44 
   6 -14  -3  117.79    4.38 
  -6 -14   3  108.76    4.77 
  -6  14   3  109.47    4.66 
   6  14  -3  113.54    3.88 
  -5 -14   3    0.32    0.82 
   5 -14  -3   -0.16    0.64 
  -5 -14   3   -0.08    0.59 
  -5  14   3   -0.29    0.75 
   5  14  -3    0.23    0.63 
  -4 -14   3   22.84    1.57 
   4 -14  -3   20.49    1.80 
  -4 -14   3   22.31    2.03 
  -4  14   3   20.90    1.87 
   4  14  -3   21.98    1.54 
   3 -14  -3    3.15    0.90 
  -3 -14   3    3.10    0.96 
   3  14  -3    2.77    0.75 
  -3  14   3    3.64    0.95 
  -2 -14   3   20.70    1.69 
   2 -14  -3   17.64    1.65 
   2  14  -3   17.85    1.48 
  -1 -14   3   28.95    1.79 
   1 -14  -3   29.99    1.49 
   1 -14  -3   29.18    1.92 
  -1 -14   3   26.59    1.82 
  -1  14   3   26.60    1.65 
   0 -14   3  116.80    3.69 
   0 -14   3  116.00    4.02 
   0 -14  -3  116.89    4.10 
   0 -14  -3  113.08    3.65 
   0  14   3  119.57    3.57 
   0  14  -3  113.26    4.02 
   1 -14   3    1.23    0.73 
  -1 -14  -3    2.69    0.82 
   1 -14   3    1.84    0.59 
  -1 -14  -3    2.26    0.74 
   1  14   3    2.38    0.57 
  -1  14  -3    2.26    0.81 
  -2 -14  -3   67.49    2.97 
  -2 -14  -3   73.02    3.06 
   2 -14   3   65.98    3.01 
  -2  14  -3   64.40    3.07 
  -3 -14  -3    4.28    1.00 
  -3 -14  -3    3.01    0.95 
   3 -14   3    2.20    0.85 
  -3  14  -3    3.17    1.04 
  -4 -14  -3  122.38    4.67 
  -4 -14  -3  124.37    4.27 
   4 -14   3  121.19    4.50 
  -4  14  -3  123.88    4.75 
  -5 -14  -3    1.98    0.89 
   5 -14   3    2.51    0.95 
  -5 -14  -3    2.71    1.03 
  -5  14  -3    2.69    1.11 
  -6 -14  -3   17.85    2.17 
  -6  14  -3   17.42    2.06 
  -7 -14  -3    0.95    1.05 
  -7  14  -3   -0.60    0.82 
  -8 -14  -3    3.86    1.54 
  -8  14  -3    4.60    1.55 
  -9 -14  -3    0.46    1.23 
  -9  14  -3    0.92    1.13 
 -10 -14  -3   37.71    3.62 
 -10  14  -3   33.46    3.19 
 -11 -14  -3    1.96    1.73 
 -11  14  -3    0.77    1.41 
 -12 -14  -3   81.34    5.41 
 -12  14  -3   71.72    4.72 
 -13 -14  -3    1.70    2.17 
 -13  14  -3    4.44    2.08 
 -13 -15   3   22.98    3.65 
 -12 -15   3   30.73    3.94 
 -12  15   3   27.53    3.49 
 -11 -15   3   24.31    3.35 
 -11  15   3   19.90    2.98 
 -10 -15   3   23.25    3.08 
 -10  15   3   24.09    2.96 
   9 -15  -3   18.28    2.07 
  -9 -15   3   20.92    2.77 
  -9  15   3   21.82    2.66 
  -8 -15   3    4.28    1.59 
   8 -15  -3    3.12    1.19 
  -8  15   3    1.89    1.38 
  -7 -15   3    2.47    1.30 
   7 -15  -3    1.30    1.00 
  -7  15   3    3.31    1.25 
  -6 -15   3   24.55    2.46 
   6 -15  -3   22.16    2.04 
  -6  15   3   20.67    2.18 
   5 -15  -3   40.44    2.52 
  -5 -15   3   39.71    2.72 
  -5 -15   3   41.41    2.13 
   5  15  -3   37.85    2.08 
  -5  15   3   37.55    2.65 
  -4 -15   3  105.12    4.36 
   4 -15  -3  104.29    4.12 
  -4 -15   3  107.35    3.73 
  -4  15   3  107.53    4.24 
   4  15  -3  110.58    3.74 
   3 -15  -3   91.62    3.88 
  -3 -15   3  115.49    4.27 
   3  15  -3  107.29    3.68 
   2 -15  -3  153.48    5.12 
  -2 -15   3  159.07    4.87 
  -2 -15   3  149.22    5.02 
   2  15  -3  153.11    4.77 
  -2  15   3  156.80    4.91 
  -1 -15   3   70.03    2.91 
  -1 -15   3   67.10    2.94 
   1 -15  -3   70.87    2.50 
   1 -15  -3   69.79    3.12 
  -1  15   3   72.40    2.82 
   0 -15  -3   48.73    2.20 
   0 -15  -3   44.90    2.50 
   0 -15   3   45.66    2.44 
   0 -15   3   53.24    2.30 
   0  15   3   47.42    2.09 
   0  15  -3   53.58    2.59 
  -1 -15  -3    5.89    1.12 
   1 -15   3    5.31    0.80 
   1 -15   3    3.87    1.00 
  -1 -15  -3    6.90    1.08 
   1  15   3    5.08    0.74 
  -1  15  -3    4.39    1.02 
  -2 -15  -3    1.33    0.76 
   2 -15   3    1.75    0.85 
  -2 -15  -3    1.55    0.78 
  -2  15  -3    3.08    1.02 
   3 -15   3    4.36    1.08 
  -3 -15  -3    5.62    1.17 
  -3 -15  -3    4.78    1.08 
  -3  15  -3    5.71    1.24 
   4 -15   3   23.98    2.10 
  -4 -15  -3   23.68    2.15 
  -4 -15  -3   27.41    1.91 
  -4  15  -3   27.63    2.20 
  -5 -15  -3   28.36    1.98 
  -5 -15  -3   29.34    2.50 
   5 -15   3   26.26    2.25 
  -5  15  -3   26.13    2.36 
  -6 -15  -3   36.80    2.79 
   6 -15   3   32.33    2.51 
  -6  15  -3   43.95    3.00 
  -7 -15  -3   29.62    2.80 
  -7  15  -3   27.53    2.64 
  -8 -15  -3   78.27    4.45 
  -8  15  -3   80.34    4.39 
  -9 -15  -3   21.37    2.85 
  -9  15  -3   22.94    2.75 
 -10 -15  -3   32.99    3.57 
 -10  15  -3   33.38    3.33 
 -11  15  -3   17.15    2.70 
 -12 -15  -3    1.86    1.88 
 -12  15  -3    3.16    1.91 
 -13 -15  -3    1.23    1.84 
 -13 -16   3    2.22    2.03 
 -12 -16   3    1.53    1.84 
 -12  16   3    1.28    1.66 
 -11 -16   3    2.91    1.91 
 -11  16   3    1.90    1.83 
  10 -16  -3    4.14    1.46 
 -10 -16   3    2.88    1.66 
 -10  16   3    4.76    1.91 
   9 -16  -3   62.95    3.46 
  -9 -16   3   63.75    4.20 
  -9  16   3   63.68    4.10 
   8 -16  -3    7.86    1.57 
  -8 -16   3    5.30    1.64 
  -8  16   3    4.18    1.56 
  -7 -16   3  119.46    5.49 
   7 -16  -3  136.82    5.15 
  -7  16   3  137.64    5.68 
   6 -16  -3    9.27    1.59 
  -6 -16   3    8.40    1.73 
  -6  16   3    9.75    1.71 
   5 -16  -3   95.96    4.02 
  -5 -16   3   95.39    3.54 
  -5 -16   3   99.06    4.48 
   5  16  -3   96.89    3.55 
  -5  16   3   88.87    4.12 
  -4 -16   3   -0.61    0.73 
   4 -16  -3    0.20    0.77 
  -4 -16   3    0.11    0.69 
   4  16  -3   -0.19    0.59 
  -4  16   3    0.09    0.79 
  -3 -16   3    2.05    0.94 
   3 -16  -3    0.96    0.84 
   3  16  -3    2.09    0.79 
  -2 -16   3    3.13    0.97 
   2 -16  -3    2.61    0.96 
  -2 -16   3    3.55    0.92 
  -2  16   3    3.33    0.92 
   2  16  -3    2.41    0.84 
   1 -16  -3   34.96    2.30 
  -1 -16   3   33.01    2.00 
  -1 -16   3   32.56    2.13 
  -1  16   3   30.96    1.88 
   0 -16   3   42.71    2.45 
   0 -16   3   47.66    2.23 
   0 -16  -3   48.03    2.23 
   0 -16  -3   45.10    2.61 
   0  16   3   43.79    2.07 
  -1 -16  -3  100.43    3.92 
   1 -16   3   93.00    3.85 
  -1 -16  -3  103.97    3.73 
   1 -16   3   98.48    3.22 
  -1  16  -3   99.81    3.97 
  -2 -16  -3    4.08    1.04 
   2 -16   3    3.43    1.00 
  -2 -16  -3    4.29    1.05 
  -2  16  -3    3.79    1.14 
  -3 -16  -3   97.25    4.07 
   3 -16   3  103.11    4.14 
  -3 -16  -3  106.20    4.00 
  -3  16  -3  102.14    4.30 
   4 -16   3   17.13    1.90 
  -4 -16  -3   13.66    1.59 
  -4 -16  -3   14.70    1.83 
  -4  16  -3   13.62    1.82 
   5 -16   3   56.81    3.17 
  -5 -16  -3   67.31    3.10 
  -5 -16  -3   57.84    3.40 
  -5  16  -3   58.39    3.42 
  -6 -16  -3    0.90    1.05 
   6 -16   3    1.99    1.04 
  -6  16  -3    0.46    1.03 
  -7 -16  -3    3.33    1.36 
  -7  16  -3    4.99    1.52 
  -8 -16  -3    5.83    1.77 
  -8  16  -3    4.59    1.56 
  -9 -16  -3   10.43    2.20 
  -9  16  -3   10.73    2.12 
 -10 -16  -3    3.08    1.71 
 -10  16  -3    3.23    1.51 
 -11 -16  -3   38.18    3.94 
 -11  16  -3   47.63    3.84 
 -12 -16  -3    4.96    2.28 
 -12  16  -3    4.75    1.99 
 -12 -17   3    4.87    2.42 
 -12  17   3    7.32    2.58 
 -11 -17   3   41.55    4.18 
 -11  17   3   42.62    4.05 
  10 -17  -3    3.76    1.39 
 -10 -17   3   -1.20    1.30 
 -10  17   3    0.12    1.40 
   9 -17  -3   13.96    1.99 
  -9 -17   3   14.95    2.57 
  -9  17   3   13.68    2.37 
  -8 -17   3    0.74    1.20 
   8 -17  -3    1.36    1.10 
  -8  17   3   -1.66    1.06 
  -7 -17   3   -0.08    1.02 
   7 -17  -3    3.03    1.24 
  -7  17   3    0.03    0.94 
  -6 -17   3    5.40    1.47 
   6 -17  -3    6.46    1.46 
  -6  17   3    8.01    1.65 
  -5 -17   3   34.77    2.68 
   5 -17  -3   37.43    2.61 
  -5  17   3   36.39    2.71 
  -4 -17   3    1.43    0.81 
   4 -17  -3    1.56    0.95 
  -4 -17   3    0.14    0.86 
   4  17  -3    1.53    0.79 
  -4  17   3    1.54    1.01 
  -3 -17   3  110.21    4.38 
   3 -17  -3  108.23    4.36 
   3  17  -3  104.89    3.81 
  -2 -17   3   20.96    1.88 
  -2 -17   3   24.13    1.84 
   2 -17  -3   23.36    2.06 
   2  17  -3   18.45    1.65 
  -2  17   3   22.77    1.77 
   1 -17  -3   84.99    3.76 
  -1 -17   3   91.09    3.55 
  -1 -17   3   90.36    3.68 
  -1  17   3   93.74    3.45 
   0 -17  -3   34.42    1.99 
   0 -17   3   37.14    2.39 
   0 -17   3   35.38    1.97 
   0 -17  -3   35.91    2.41 
   0  17   3   38.81    2.00 
   1 -17   3    7.23    1.33 
  -1 -17  -3    6.56    1.34 
  -1 -17  -3    7.60    1.21 
  -1  17  -3    7.89    1.38 
  -2 -17  -3    6.32    1.21 
   2 -17   3    6.50    1.33 
  -2 -17  -3    6.02    1.21 
  -2  17  -3    6.28    1.29 
  -3 -17  -3    5.20    1.23 
  -3 -17  -3    4.89    1.19 
   3 -17   3    4.66    1.21 
  -3  17  -3    3.10    1.10 
  -4 -17  -3    0.17    0.89 
   4 -17   3    1.02    0.94 
  -4 -17  -3   -0.13    0.79 
  -4  17  -3    1.08    0.93 
  -5 -17  -3   35.97    2.41 
   5 -17   3   36.83    2.62 
  -5 -17  -3   39.36    2.85 
  -5  17  -3   31.63    2.63 
  -6 -17  -3   16.38    1.83 
   6 -17   3   19.38    2.17 
  -6 -17  -3   19.89    2.38 
  -6  17  -3   14.29    2.19 
  -7 -17  -3   44.12    3.32 
  -7  17  -3   49.84    3.43 
  -8 -17  -3    2.40    1.50 
  -9 -17  -3   58.28    4.17 
  -9  17  -3   64.23    4.25 
 -10 -17  -3    7.47    2.14 
 -10  17  -3    6.02    1.99 
 -11 -17  -3   28.60    3.65 
 -11  17  -3   18.78    3.02 
 -12 -17  -3   -3.66    1.27 
 -12  17  -3   -0.33    1.59 
 -12 -18   3    1.87    2.00 
 -11 -18   3    0.53    1.65 
 -11  18   3    2.18    1.97 
 -10 -18   3   27.49    3.49 
  10 -18  -3   28.11    2.70 
 -10  18   3   25.41    3.28 
   9 -18  -3   23.79    2.54 
  -9 -18   3   28.41    3.30 
  -9  18   3   35.37    3.39 
  -8 -18   3   49.70    3.78 
   8 -18  -3   42.81    3.02 
  -8  18   3   43.68    3.32 
  -7 -18   3   43.41    3.35 
   7 -18  -3   46.97    3.12 
  -7  18   3   49.11    3.52 
   6 -18  -3   18.78    2.13 
  -6 -18   3   21.61    2.50 
  -6  18   3   18.14    2.31 
   5 -18  -3   56.02    3.20 
  -5 -18   3   52.97    3.32 
  -5  18   3   57.89    3.39 
  -4 -18   3   42.06    2.46 
  -4 -18   3   41.78    2.78 
   4 -18  -3   41.36    2.72 
  -4  18   3   36.83    2.57 
  -3 -18   3    3.49    1.11 
   3 -18  -3    1.85    1.01 
   3  18  -3    1.95    0.88 
  -2 -18   3    2.00    0.90 
   2 -18  -3    1.61    0.95 
  -2 -18   3    1.38    0.87 
   2  18  -3    1.36    0.84 
  -2  18   3    2.37    0.93 
   1 -18  -3   21.56    2.12 
  -1 -18   3   21.20    1.79 
  -1 -18   3   19.85    1.91 
  -1  18   3   24.41    1.74 
   0 -18  -3   27.99    2.31 
   0 -18   3   27.70    2.13 
   0 -18   3   29.28    1.89 
  -1 -18  -3   40.55    2.36 
  -1 -18  -3   38.75    2.54 
   1 -18   3   38.37    2.53 
  -1  18  -3   41.34    2.59 
   2 -18   3   82.27    3.84 
  -2 -18  -3   94.21    3.80 
  -2 -18  -3   83.54    3.76 
  -2  18  -3   83.23    3.84 
   3 -18   3   65.97    3.45 
  -3 -18  -3   72.68    3.50 
  -3 -18  -3   68.82    3.43 
  -3  18  -3   68.68    3.59 
  -4 -18  -3   80.33    3.62 
   4 -18   3   82.89    3.97 
  -4 -18  -3   82.89    3.96 
  -4  18  -3   88.14    4.18 
  -5 -18  -3   11.58    1.63 
   5 -18   3   12.00    1.85 
  -5 -18  -3   12.10    1.91 
  -5  18  -3   10.80    1.86 
  -6 -18  -3   13.93    1.79 
  -6 -18  -3   16.32    2.29 
   6 -18   3   18.83    2.22 
  -6  18  -3   12.76    2.08 
  -7 -18  -3    2.45    1.48 
  -7  18  -3    4.35    1.57 
  -8 -18  -3    8.24    1.97 
  -9 -18  -3    6.65    2.02 
  -9  18  -3    5.18    1.86 
 -10 -18  -3   35.43    3.72 
 -10  18  -3   33.11    3.49 
 -11 -18  -3   20.24    3.29 
 -11  18  -3   11.82    2.76 
 -12 -18  -3   24.89    3.69 
 -12 -19   3   30.39    4.04 
 -11 -19   3   -0.40    1.48 
 -11  19   3   -0.21    1.82 
 -10 -19   3   29.74    3.58 
  10 -19  -3   24.09    2.67 
 -10  19   3   21.08    3.03 
   9 -19  -3    1.62    1.29 
  -9 -19   3    0.96    1.50 
  -9  19   3    0.98    1.30 
   8 -19  -3   -0.06    1.03 
  -8 -19   3    0.58    1.27 
  -8  19   3    1.51    1.52 
  -7 -19   3    0.45    1.25 
   7 -19  -3    0.54    1.10 
  -7  19   3    0.70    1.34 
  -6 -19   3    7.76    1.78 
   6 -19  -3    9.49    1.71 
  -6  19   3    9.68    1.89 
   5 -19  -3    2.95    1.16 
  -5 -19   3    2.01    1.26 
  -5  19   3    5.01    1.42 
  -4 -19   3   85.16    4.06 
   4 -19  -3   77.08    3.83 
  -4  19   3   77.47    3.85 
   3 -19  -3    1.94    1.14 
  -3 -19   3    0.61    0.98 
  -3 -19   3    1.83    0.98 
   2 -19  -3  150.42    5.58 
  -2 -19   3  147.71    5.26 
  -2 -19   3  158.87    5.40 
   2  19  -3  154.66    5.16 
  -2  19   3  155.23    5.22 
   1 -19  -3    0.11    0.83 
  -1 -19   3    1.70    0.87 
  -1 -19   3    0.31    0.90 
   1  19  -3    1.24    0.89 
   0 -19  -3   81.04    3.79 
   0 -19   3   80.89    3.76 
  -1 -19  -3    6.99    1.26 
   1 -19   3    6.47    1.42 
  -1 -19  -3    6.16    1.35 
  -1  19  -3    3.65    1.20 
   2 -19   3   11.28    1.77 
  -2 -19  -3   12.82    1.66 
  -2 -19  -3   13.81    1.85 
  -2  19  -3   16.05    1.93 
  -3 -19  -3   -0.01    0.86 
  -3 -19  -3    3.80    1.22 
   3 -19   3    2.47    1.14 
  -3  19  -3    1.86    1.16 
   4 -19   3   10.74    1.85 
  -4 -19  -3   11.38    1.83 
  -4 -19  -3   11.20    1.69 
  -4  19  -3    9.00    1.71 
   5 -19   3   -0.74    0.85 
  -5 -19  -3    0.56    0.99 
  -5 -19  -3    2.85    1.15 
  -5  19  -3    0.90    1.06 
  -6 -19  -3   73.35    3.53 
   6 -19   3   64.95    3.73 
  -6 -19  -3   68.47    4.04 
  -6  19  -3   56.33    3.68 
  -7 -19  -3   -1.35    1.04 
  -7  19  -3   -0.61    1.12 
  -8 -19  -3   92.71    5.11 
  -8  19  -3   94.11    5.19 
  -9 -19  -3   -0.35    1.44 
  -9  19  -3    0.06    1.48 
 -10 -19  -3   33.01    3.73 
 -10  19  -3   29.27    3.42 
 -11 -19  -3    2.06    1.73 
 -11  19  -3   -0.56    1.69 
 -11 -20   3    3.38    2.12 
 -11  20   3    0.79    1.62 
  10 -20  -3   23.41    2.73 
 -10 -20   3   29.34    3.65 
 -10  20   3   22.86    3.18 
  -9 -20   3    6.62    2.13 
   9 -20  -3    4.35    1.61 
  -9  20   3    3.18    1.86 
   8 -20  -3   42.18    3.08 
  -8 -20   3   38.50    3.67 
  -8  20   3   36.60    3.52 
   7 -20  -3   29.52    2.79 
  -7 -20   3   26.32    2.98 
  -7  20   3   29.61    3.07 
   6 -20  -3   49.45    3.26 
  -6 -20   3   53.54    3.67 
  -6  20   3   57.71    3.70 
  -5 -20   3    7.38    1.74 
   5 -20  -3    4.11    1.37 
  -5  20   3    7.26    1.71 
   4 -20  -3    7.62    1.59 
  -4 -20   3    7.40    1.63 
  -4  20   3    6.81    1.52 
  -3 -20   3    5.17    1.23 
   3 -20  -3    1.93    1.14 
  -3 -20   3    5.85    1.40 
   2 -20  -3    0.37    0.95 
  -2 -20   3    1.63    0.93 
  -2 -20   3    1.78    1.04 
   2  20  -3    1.30    1.00 
  -2  20   3    0.28    0.83 
  -1 -20   3    1.13    1.02 
  -1 -20   3    0.46    0.79 
   1 -20  -3    0.43    0.94 
   1  20  -3    2.23    1.01 
   0 -20   3   48.96    2.94 
   0 -20  -3   46.63    2.98 
   1 -20   3   58.10    3.23 
  -1 -20  -3   48.51    3.04 
  -1  20  -3   52.58    3.05 
  -2 -20  -3  140.26    5.06 
   2 -20   3  134.90    5.33 
  -2 -20  -3  132.73    5.17 
  -2  20  -3  134.43    5.33 
  -3 -20  -3   40.60    2.78 
   3 -20   3   34.55    2.69 
  -3 -20  -3   38.46    2.68 
  -3  20  -3   40.24    2.90 
   4 -20   3   82.02    4.21 
  -4 -20  -3   79.07    3.81 
  -4 -20  -3   84.13    4.11 
  -4  20  -3   81.08    4.22 
  -5 -20  -3    4.80    1.52 
  -5 -20  -3    3.73    1.41 
   5 -20   3    1.74    1.18 
  -5  20  -3    3.21    1.42 
  -6 -20  -3    6.80    1.73 
  -6 -20  -3    7.55    1.62 
   6 -20   3    7.36    1.75 
  -6  20  -3    5.36    1.55 
   7 -20   3    1.73    1.39 
  -7 -20  -3    1.43    1.36 
  -7  20  -3    1.82    1.38 
  -8 -20  -3    3.09    1.60 
  -8  20  -3    0.74    1.50 
  -9 -20  -3    7.83    2.10 
  -9  20  -3    9.40    2.34 
 -10 -20  -3   38.43    4.04 
 -10  20  -3   36.92    3.95 
 -11 -20  -3    8.68    2.43 
 -11 -21   3   24.83    3.66 
  10 -21  -3    6.59    1.90 
 -10 -21   3   14.89    2.82 
 -10  21   3    7.08    2.36 
  -9 -21   3    1.58    1.64 
   9 -21  -3    0.24    1.28 
  -9  21   3    0.10    1.73 
   8 -21  -3   -0.51    1.08 
  -8 -21   3    0.65    1.27 
  -8  21   3   -0.79    1.36 
   7 -21  -3    0.14    1.16 
  -7 -21   3    0.77    1.23 
  -7  21   3   -1.23    1.37 
  -6 -21   3   10.97    2.06 
   6 -21  -3    9.53    1.93 
  -6  21   3   10.16    2.08 
  -5 -21   3   13.59    2.20 
   5 -21  -3   17.13    2.26 
  -5  21   3   17.91    2.31 
   4 -21  -3   33.68    2.84 
  -4 -21   3   28.06    2.64 
  -4  21   3   27.79    2.52 
  -3 -21   3   71.45    3.54 
   3 -21  -3   58.63    3.61 
  -3 -21   3   70.83    3.69 
  -2 -21   3   40.13    2.70 
  -2 -21   3   38.90    2.64 
   2 -21  -3   40.41    2.89 
  -1 -21   3   59.07    3.35 
   1 -21  -3   56.98    3.45 
   1  21  -3   66.26    3.26 
   0 -21  -3   10.68    1.80 
   0 -21   3   11.16    1.72 
  -1 -21  -3   10.47    1.78 
   1 -21   3   17.07    2.13 
  -1  21  -3   16.55    1.95 
   2 -21   3    4.31    1.44 
  -2 -21  -3    2.58    1.19 
  -2 -21  -3    5.24    1.28 
  -2  21  -3    2.06    1.18 
   3 -21   3    1.37    1.14 
  -3 -21  -3    0.20    0.99 
  -3 -21  -3    4.35    1.34 
  -3  21  -3    2.12    1.34 
  -4 -21  -3    7.18    1.65 
   4 -21   3    6.72    1.67 
  -4 -21  -3    8.44    1.64 
  -4  21  -3    6.63    1.62 
  -5 -21  -3   40.37    2.93 
   5 -21   3   39.19    3.03 
  -5 -21  -3   40.48    3.11 
  -5  21  -3   35.73    3.09 
   6 -21   3   30.86    2.98 
  -6 -21  -3   38.58    3.30 
  -6 -21  -3   40.40    2.90 
  -6  21  -3   36.70    3.23 
   7 -21   3   69.07    4.21 
  -7 -21  -3   78.26    4.66 
  -7  21  -3   78.00    4.62 
  -8 -21  -3   14.59    2.56 
  -8  21  -3   12.73    2.56 
  -9 -21  -3   36.56    3.79 
  -9  21  -3   39.18    3.82 
 -10 -21  -3    2.34    1.94 
 -10  21  -3   -0.98    1.69 
 -11 -21  -3    6.21    2.18 
  10 -22  -3    0.93    1.40 
 -10 -22   3    2.31    1.89 
 -10  22   3   -0.71    1.55 
  -9 -22   3   39.06    3.92 
   9 -22  -3   41.94    3.33 
  -9  22   3   38.00    3.82 
  -8 -22   3    1.81    1.61 
   8 -22  -3   -1.45    1.20 
  -8  22   3   -2.56    1.34 
  -7 -22   3   43.51    3.73 
   7 -22  -3   40.27    3.35 
  -7  22   3   39.31    3.49 
  -6 -22   3    2.53    1.47 
   6 -22  -3    0.11    1.12 
   5 -22  -3   34.18    3.02 
  -5 -22   3   34.14    3.09 
  -5  22   3   40.94    3.12 
  -4 -22   3   -0.17    1.00 
   4 -22  -3   -0.12    1.05 
   3 -22  -3    1.61    1.23 
  -3 -22   3   -0.37    0.94 
  -3 -22   3    0.91    1.06 
   2 -22  -3    3.43    1.32 
  -2 -22   3    5.45    1.51 
  -1 -22   3   14.32    1.96 
   1 -22  -3   13.01    2.04 
   0 -22   3    1.90    1.11 
   0 -22  -3    1.37    1.17 
   1 -22   3   65.93    3.76 
  -1 -22  -3   73.63    3.89 
  -1  22  -3   76.27    3.84 
   2 -22   3    1.18    1.16 
  -2 -22  -3    0.30    0.93 
  -2  22  -3    0.68    1.12 
   3 -22   3  120.50    5.33 
  -3 -22  -3  128.56    5.22 
  -3 -22  -3  135.67    5.30 
  -3  22  -3  123.67    5.40 
  -4 -22  -3    0.10    1.09 
  -4 -22  -3   -0.11    1.16 
   4 -22   3   -1.55    1.08 
  -4  22  -3    0.44    1.20 
   5 -22   3   43.58    3.27 
  -5 -22  -3   41.60    3.20 
  -5 -22  -3   40.15    3.04 
  -5  22  -3   40.55    3.31 
  -6 -22  -3   -0.51    1.13 
  -6 -22  -3   -0.03    1.13 
   6 -22   3   -0.52    1.10 
  -6  22  -3   -1.06    1.17 
   7 -22   3    1.73    1.48 
  -7 -22  -3    1.01    1.42 
  -7  22  -3    5.41    1.74 
  -8 -22  -3    0.79    1.54 
  -8  22  -3    0.99    1.51 
  -9 -22  -3   14.31    2.76 
  -9  22  -3   19.65    3.05 
 -10 -22  -3    1.53    1.69 
 -10  22  -3    2.24    2.03 
 -10 -23   3    4.66    2.13 
  10 -23  -3    7.95    2.09 
 -10  23   3    5.03    2.10 
  -9 -23   3    7.44    2.32 
   9 -23  -3    8.89    2.09 
  -9  23   3   15.86    2.83 
  -8 -23   3   -0.97    1.30 
   8 -23  -3    2.07    1.57 
  -8  23   3   -0.72    1.72 
  -7 -23   3    3.67    1.77 
   7 -23  -3    2.00    1.43 
  -7  23   3    2.20    1.67 
  -6 -23   3    2.94    1.50 
   6 -23  -3    0.87    1.31 
  -6  23   3    1.64    1.46 
   5 -23  -3   19.30    2.54 
  -5 -23   3   23.63    2.74 
  -5  23   3   22.68    2.60 
   4 -23  -3   29.55    2.92 
  -4 -23   3   30.07    2.84 
   3 -23  -3   34.00    3.02 
  -3 -23   3   38.64    2.94 
  -3 -23   3   40.21    2.89 
   2 -23  -3   26.53    2.71 
  -2 -23   3   23.17    2.43 
   1 -23  -3   68.68    3.91 
  -1 -23   3   67.02    3.69 
   0 -23  -3    3.32    1.41 
   0 -23   3    1.94    1.21 
  -1 -23  -3    8.92    1.82 
   1 -23   3    5.54    1.57 
  -2 -23  -3    0.58    1.07 
   2 -23   3   -0.39    1.04 
  -2  23  -3    0.66    1.13 
  -3 -23  -3    1.69    1.24 
   3 -23   3   -0.68    1.09 
  -3  23  -3    0.29    1.17 
  -4 -23  -3    6.84    1.65 
   4 -23   3   10.65    2.02 
  -4 -23  -3    6.86    1.67 
  -4  23  -3    7.04    1.79 
   5 -23   3   62.79    3.97 
  -5 -23  -3   67.48    3.83 
  -5 -23  -3   66.93    3.97 
  -5  23  -3   53.16    3.76 
  -6 -23  -3    5.52    1.83 
   6 -23   3    4.77    1.74 
  -6 -23  -3    2.88    1.37 
  -6  23  -3    2.72    1.65 
   7 -23   3   46.27    3.80 
  -7 -23  -3   47.66    3.72 
  -7  23  -3   47.27    3.84 
  -8 -23  -3   14.68    2.73 
  -8  23  -3   13.37    2.63 
  -9 -23  -3   41.40    4.07 
  -9  23  -3   39.47    3.98 
 -10 -23  -3    8.38    2.43 
  -9 -24   3    3.42    2.12 
   9 -24  -3    5.36    1.96 
  -8 -24   3   66.51    4.74 
   8 -24  -3   70.33    4.32 
  -8  24   3   62.50    4.67 
  -7 -24   3    5.42    2.01 
   7 -24  -3    7.21    1.94 
  -7  24   3   10.13    2.28 
   6 -24  -3   69.74    4.27 
  -6 -24   3   71.55    4.49 
  -6  24   3   70.81    4.36 
   5 -24  -3   -0.26    1.29 
  -5 -24   3   -0.40    1.19 
  -5  24   3   -0.53    1.15 
  -4 -24   3    9.44    1.90 
   4 -24  -3   12.29    2.18 
  -3 -24   3    2.19    1.31 
   3 -24  -3    1.62    1.25 
  -2 -24   3    5.31    1.62 
   2 -24  -3    6.88    1.78 
   1 -24  -3    3.30    1.50 
  -1 -24   3    4.27    1.58 
   0 -24  -3   48.75    3.50 
   0 -24   3   54.17    3.48 
   1 -24   3    8.03    1.81 
  -1 -24  -3    8.10    1.81 
   2 -24   3   63.23    3.93 
  -2 -24  -3   52.69    3.55 
  -2  24  -3   53.29    3.48 
   3 -24   3   16.36    2.39 
  -3 -24  -3   19.35    2.46 
  -3  24  -3   18.28    2.40 
  -4 -24  -3   37.90    3.15 
   4 -24   3   32.99    3.16 
  -4  24  -3   42.46    3.36 
  -5 -24  -3    7.86    1.93 
  -5 -24  -3   11.98    2.11 
   5 -24   3   10.26    2.11 
  -5  24  -3    7.31    2.03 
  -6 -24  -3    8.85    2.09 
  -6 -24  -3   11.23    2.01 
   6 -24   3    9.58    2.17 
  -6  24  -3    4.44    1.93 
  -7 -24  -3    0.14    1.24 
   7 -24   3    0.28    1.49 
  -8 -24  -3   -1.53    1.25 
  -8  24  -3   -1.58    1.62 
  -9 -24  -3    3.07    1.95 
  -9  24  -3    4.04    1.77 
  -9 -25   3    2.94    2.03 
  -8 -25   3   -1.14    1.43 
   8 -25  -3    0.42    1.52 
  -8  25   3   -4.08    1.30 
   7 -25  -3    0.26    1.44 
  -7 -25   3    0.26    1.53 
  -7  25   3   -1.57    1.30 
   6 -25  -3    6.03    1.87 
  -6 -25   3    6.77    2.00 
  -6  25   3    6.03    1.85 
   5 -25  -3    4.97    1.82 
  -5 -25   3    7.13    1.90 
   4 -25  -3   70.93    4.37 
   3 -25  -3    5.53    1.86 
  -3 -25   3    6.95    1.76 
  -2 -25   3   79.96    4.30 
   2 -25  -3   77.07    4.44 
  -1 -25   3    3.86    1.45 
   1 -25  -3    1.05    1.25 
   0 -25  -3   30.41    3.01 
   0 -25   3   30.70    2.94 
   1 -25   3    1.61    1.22 
  -1 -25  -3   -1.05    1.11 
  -2 -25  -3    3.15    1.53 
   2 -25   3    1.09    1.43 
  -2  25  -3    1.83    1.32 
   3 -25   3   -1.85    1.04 
  -3 -25  -3   -0.08    1.08 
  -3  25  -3    0.80    1.29 
  -4 -25  -3   10.93    2.14 
   4 -25   3   10.08    2.23 
  -4  25  -3    6.39    1.91 
  -5 -25  -3   -0.51    1.23 
  -5 -25  -3   -1.03    1.18 
   5 -25   3    1.29    1.45 
  -5  25  -3   -0.55    1.36 
   6 -25   3   50.39    3.81 
  -6 -25  -3   45.75    3.75 
  -6 -25  -3   43.08    3.31 
  -6  25  -3   45.26    3.73 
  -7 -25  -3    1.31    1.66 
   7 -25   3    2.49    1.79 
  -7  25  -3    2.50    1.84 
  -8 -25  -3   45.68    4.17 
  -8  25  -3   39.83    4.17 
  -8 -26   3   43.12    4.16 
   8 -26  -3   39.36    3.77 
  -8  26   3   40.94    4.02 
  -7 -26   3   27.09    3.38 
   7 -26  -3   20.87    3.06 
  -7  26   3   26.54    3.19 
   6 -26  -3   50.78    3.88 
  -6 -26   3   52.11    4.03 
   5 -26  -3   18.47    2.79 
   4 -26  -3    7.33    1.96 
  -3 -26   3    4.61    1.61 
   3 -26  -3    1.65    1.50 
  -2 -26   3    2.79    1.60 
   2 -26  -3    0.43    1.30 
  -1 -26   3    9.37    2.06 
   1 -26  -3    8.56    2.00 
   0 -26  -3   15.13    2.57 
   0 -26   3   21.86    2.74 
   1 -26   3   20.66    2.69 
  -1 -26  -3   23.31    2.79 
   2 -26   3   31.68    3.17 
  -2 -26  -3   26.77    2.94 
  -3 -26  -3   17.85    2.55 
   3 -26   3   14.89    2.54 
  -3  26  -3   14.12    2.35 
  -4 -26  -3   24.05    2.85 
   4 -26   3   31.54    3.28 
  -4  26  -3   21.56    2.82 
  -5 -26  -3   26.07    2.90 
   5 -26   3   24.54    3.06 
  -5  26  -3   22.87    3.00 
  -6 -26  -3    5.97    2.02 
   6 -26   3    9.02    2.15 
  -6  26  -3    6.97    2.28 
   7 -26   3    2.80    1.85 
  -7 -26  -3   -2.15    1.33 
  -7  26  -3   -1.17    1.42 
  -8 -26  -3    1.27    1.76 
  -8  26  -3    0.66    1.82 
   7 -27  -3    4.96    2.10 
  -7 -27   3    7.54    2.24 
   6 -27  -3    0.04    1.56 
  -6 -27   3    4.53    1.76 
   5 -27  -3   38.01    3.67 
   4 -27  -3    5.48    1.99 
   3 -27  -3   51.00    3.82 
  -3 -27   3   47.51    3.55 
  -2 -27   3   19.96    2.62 
   2 -27  -3   18.48    2.74 
   1 -27  -3   76.99    4.58 
  -1 -27   3   65.43    4.22 
   0 -27   3   -0.86    1.23 
   0 -27  -3    1.12    1.47 
  -1 -27  -3   12.13    2.30 
   1 -27   3   13.22    2.40 
   2 -27   3    0.82    1.48 
  -2 -27  -3   -1.69    1.15 
  -3 -27  -3    0.19    1.36 
   3 -27   3    3.93    1.83 
   4 -27   3    3.46    1.83 
  -4 -27  -3    3.70    1.77 
  -4  27  -3    2.58    1.72 
   5 -27   3   43.25    3.93 
  -5 -27  -3   40.76    3.51 
  -5  27  -3   40.34    3.73 
   6 -27   3   -1.06    1.41 
  -6  27  -3    0.09    1.47 
   7 -27   3   44.50    4.13 
  -7 -27  -3   41.67    3.98 
  -7  27  -3   45.04    4.21 
   6 -28  -3    2.63    1.96 
   5 -28  -3   37.33    3.80 
   4 -28  -3    1.40    1.55 
   3 -28  -3    2.39    1.71 
  -3 -28   3    1.62    1.52 
  -2 -28   3    4.01    1.80 
   2 -28  -3    4.32    1.79 
   1 -28  -3   10.90    2.40 
  -1 -28   3   10.81    2.36 
   0 -28  -3    1.35    1.48 
   0 -28   3   -0.09    1.54 
  -1 -28  -3   36.60    3.50 
   1 -28   3   43.26    3.79 
  -2 -28  -3    6.77    1.98 
   2 -28   3    9.20    2.14 
  -3 -28  -3   52.11    3.97 
   3 -28   3   53.78    4.18 
  -4 -28  -3    8.04    2.26 
   4 -28   3    4.82    2.05 
   5 -28   3   37.69    3.87 
  -5 -28  -3   38.11    3.52 
  -5  28  -3   34.48    3.58 
   6 -28   3    2.94    1.82 
  -6  28  -3   -2.68    1.47 
   5 -29  -3   13.19    2.66 
   4 -29  -3   20.88    3.10 
   3 -29  -3   19.79    3.06 
   2 -29  -3   37.59    3.72 
  -2 -29   3   44.27    3.77 
   1 -29  -3   10.82    2.35 
  -1 -29   3   11.19    2.42 
   0 -29  -3   22.33    3.07 
   0 -29   3   15.64    2.74 
  -1 -29  -3    3.02    1.64 
   1 -29   3    3.64    1.75 
   2 -29   3    8.44    2.29 
  -3 -29  -3    1.99    1.80 
   3 -29   3    3.21    1.97 
   4 -29   3   10.39    2.59 
  -4 -29  -3    6.87    2.19 
  -5 -29  -3    4.09    1.90 
   5 -29   3    1.88    1.87 
   3 -30  -3    0.40    1.69 
   2 -30  -3    1.44    1.66 
  -2 -30   3    0.51    1.68 
   1 -30  -3    4.56    2.00 
  -1 -30   3    2.16    2.04 
   0 -30   3   17.02    2.83 
   0 -30  -3   15.66    2.74 
   1 -30   3    0.64    1.74 
  -1 -30  -3    1.28    1.79 
  -2 -30  -3   71.59    4.75 
   2 -30   3   62.31    4.48 
   3 -30   3    0.19    1.89 
  -3 -30  -3    2.17    1.98 
 -15   0   4   -0.98    1.36 
 -14   0   4   31.87    3.29 
 -13   0   4    0.68    1.32 
 -12   0   4    3.45    1.40 
 -11   0   4   -0.39    0.93 
 -10   0   4   47.55    2.92 
 -10   0   4   43.41    2.91 
  -9   0   4   -0.52    0.67 
  -9   0   4   -1.07    0.66 
  -8   0   4  126.81    4.72 
  -8   0   4  134.25    4.67 
  -7   0   4    0.07    0.63 
  -7   0   4    0.76    0.69 
  -6   0   4  189.39    5.48 
  -6   0   4  186.31    5.60 
  -5   0   4    0.20    0.45 
  -5   0   4   -0.02    0.41 
  -4   0   4  152.60    4.47 
  -4   0   4  157.49    4.36 
  -3   0   4   -0.24    0.33 
  -3   0   4   -0.04    0.33 
  -2   0   4   10.68    0.84 
  -1   0   4    0.22    0.30 
   0   0  -4   23.04    0.99 
  -1   0  -4   -0.11    0.25 
  -1   0  -4    0.17    0.24 
  -2   0  -4  462.22   10.12 
  -2   0  -4  461.87   10.33 
  -3   0  -4   -0.14    0.30 
  -3   0  -4    0.05    0.38 
  -4   0  -4  577.85   12.58 
  -4   0  -4  544.74   12.80 
  -5   0  -4    0.27    0.43 
  -5   0  -4    0.27    0.53 
  -6   0  -4  216.77    5.93 
  -6   0  -4  216.50    6.35 
  -7   0  -4   -0.12    0.52 
  -7   0  -4   -0.11    0.64 
  -8   0  -4   10.69    1.59 
  -8   0  -4    9.37    1.32 
  -9   0  -4    0.65    1.14 
  -9   0  -4   -0.28    0.72 
 -10   0  -4   22.51    2.41 
 -10   0  -4   17.88    1.87 
 -11   0  -4   -1.15    1.12 
 -11   0  -4    1.67    1.04 
 -12   0  -4   93.38    4.41 
 -12   0  -4   87.09    4.78 
 -15  -1   4    4.15    1.84 
 -15   1   4    7.30    2.14 
 -14  -1   4   55.13    3.89 
 -14   1   4   59.76    4.19 
 -13  -1   4   23.76    2.73 
 -13   1   4   19.67    2.64 
 -12  -1   4   61.49    3.81 
 -12  -1   4   60.77    3.74 
 -12   1   4   63.94    3.89 
 -11  -1   4   24.08    2.47 
 -11  -1   4   20.78    2.32 
 -11   1   4   24.41    2.47 
 -10  -1   4   79.26    3.84 
 -10  -1   4   80.75    3.91 
 -10   1   4   78.97    3.96 
  -9  -1   4   12.33    1.66 
  -9  -1   4   11.31    1.62 
  -9   1   4   15.30    1.83 
  -8  -1   4    3.57    1.01 
  -8  -1   4    2.68    0.97 
  -8   1   4    1.41    0.89 
  -7  -1   4    2.41    0.82 
  -7  -1   4    2.52    0.82 
  -7   1   4    3.60    0.95 
  -6  -1   4    1.30    0.69 
  -6  -1   4    2.03    0.72 
  -6   1   4    1.71    0.74 
  -5  -1   4   49.61    2.24 
  -5  -1   4   44.04    2.16 
  -5   1   4   47.85    2.23 
  -4  -1   4   50.53    2.11 
  -4  -1   4   48.87    2.06 
  -4   1   4   47.99    2.10 
  -3  -1   4   71.58    2.49 
  -3  -1   4   73.26    2.45 
  -3   1   4   68.61    2.46 
  -2  -1   4  326.28    7.74 
  -2  -1   4  350.27    7.92 
   0  -1  -4  230.65    5.22 
   0   1  -4  226.30    5.33 
  -1  -1  -4  215.06    5.26 
  -1  -1  -4  222.44    4.97 
  -1   1  -4  215.30    5.13 
  -2  -1  -4  158.26    4.27 
  -2  -1  -4  162.30    3.93 
  -2   1  -4  164.80    4.14 
  -2   1  -4  165.16    4.22 
  -3  -1  -4   -0.19    0.39 
  -3  -1  -4    1.09    0.37 
  -3   1  -4    0.28    0.36 
  -3   1  -4    0.93    0.39 
  -4  -1  -4   14.95    1.29 
  -4  -1  -4   13.96    0.97 
  -4   1  -4   14.90    1.15 
  -4   1  -4   13.38    1.06 
  -5  -1  -4   27.89    1.49 
  -5  -1  -4   28.94    1.81 
  -5   1  -4   31.01    1.64 
  -5   1  -4   28.64    1.76 
  -6  -1  -4  199.85    5.97 
  -6  -1  -4  190.78    5.33 
  -6   1  -4  193.21    5.54 
  -6   1  -4  193.95    5.82 
  -7  -1  -4    9.71    1.14 
  -7  -1  -4    9.91    1.47 
  -7   1  -4    9.21    1.21 
  -7   1  -4    6.83    1.20 
  -8  -1  -4  117.07    4.70 
  -8  -1  -4  128.98    4.26 
  -8   1  -4  116.86    4.29 
  -8   1  -4  111.67    4.48 
  -9  -1  -4   33.07    2.75 
  -9  -1  -4   33.62    2.21 
  -9   1  -4   36.38    2.36 
  -9   1  -4   35.90    2.70 
 -10  -1  -4   48.34    3.24 
 -10  -1  -4   50.80    2.84 
 -10   1  -4   51.34    2.99 
 -10   1  -4   52.75    3.24 
 -11  -1  -4    9.35    2.06 
 -11  -1  -4   15.10    1.92 
 -11   1  -4   15.87    2.31 
 -11   1  -4   17.61    2.05 
 -12  -1  -4    4.43    1.73 
 -12   1  -4    2.50    1.33 
 -13  -1  -4    1.25    1.55 
 -15  -2   4   24.50    3.14 
 -15   2   4   27.46    3.37 
 -14  -2   4   10.30    2.19 
 -14   2   4    7.57    2.07 
 -13  -2   4    2.44    1.60 
 -13  -2   4    4.15    1.53 
 -13   2   4    4.66    1.65 
 -12  -2   4    1.85    1.30 
 -12  -2   4    1.98    1.31 
 -12   2   4    0.83    1.17 
 -11  -2   4   -0.33    0.85 
 -11  -2   4    1.68    1.23 
 -11   2   4   -0.57    0.87 
 -10  -2   4   12.37    1.79 
 -10  -2   4   13.44    1.92 
 -10   2   4   14.03    1.74 
 -10   2   4   13.28    1.94 
  -9  -2   4   47.14    2.73 
  -9  -2   4   46.63    2.88 
  -9   2   4   42.26    2.50 
  -9   2   4   43.82    2.84 
  -8  -2   4   18.46    1.83 
  -8  -2   4   18.66    1.75 
  -8   2   4   19.74    1.89 
  -7  -2   4  132.83    4.55 
  -7  -2   4  131.56    4.64 
  -7   2   4  138.51    4.76 
  -6  -2   4   16.10    1.43 
  -6  -2   4   13.70    1.41 
  -6   2   4   15.39    1.47 
  -5  -2   4  150.39    4.67 
   5  -2  -4  153.97    3.66 
  -5  -2   4  150.88    4.58 
  -5   2   4  154.29    4.70 
   4  -2  -4   12.99    0.72 
  -4  -2   4   12.06    1.12 
  -4  -2   4   10.81    1.04 
  -4   2   4   12.14    1.14 
  -3  -2   4   38.74    1.74 
  -3  -2   4   38.95    1.75 
  -3   2   4   37.04    1.70 
  -2  -2   4   12.78    0.90 
  -2  -2   4   11.51    0.88 
  -2   2   4   13.33    0.94 
   1   2  -4   45.69    1.66 
  -1   2   4   47.02    1.62 
   0   2  -4   12.49    0.79 
  -1  -2  -4  229.45    5.54 
  -1  -2  -4  230.39    5.11 
  -1   2  -4  225.93    5.45 
  -2  -2  -4  105.83    2.62 
  -2  -2  -4  106.89    3.12 
  -2   2  -4   99.61    2.95 
  -2   2  -4   97.88    2.91 
  -3  -2  -4  246.39    6.45 
  -3  -2  -4  269.15    5.93 
  -3   2  -4  246.05    6.26 
  -4  -2  -4   64.31    2.10 
  -4  -2  -4   64.36    2.62 
  -4   2  -4   61.99    2.41 
  -5  -2  -4  190.12    5.58 
  -5  -2  -4  181.62    4.81 
  -5   2  -4  176.97    5.13 
  -6  -2  -4   82.41    3.53 
  -6  -2  -4   94.92    3.08 
  -6   2  -4   90.97    3.35 
  -7  -2  -4    5.91    1.25 
  -7  -2  -4    8.13    1.03 
  -7   2  -4    7.39    1.17 
  -8  -2  -4    0.98    0.68 
  -8  -2  -4    1.27    0.95 
  -8   2  -4    1.97    0.88 
  -9  -2  -4   22.43    1.78 
  -9  -2  -4   26.56    2.51 
  -9   2  -4   21.92    1.99 
 -10  -2  -4    7.35    1.72 
 -10  -2  -4    7.07    1.33 
 -10   2  -4    9.46    1.60 
 -11  -2  -4   55.49    3.83 
 -11  -2  -4   54.09    3.05 
 -11   2  -4   52.92    3.18 
 -12  -2  -4   10.72    2.19 
 -12   2  -4   11.38    1.97 
 -13  -2  -4   74.82    4.85 
 -13   2  -4   71.04    4.20 
 -15   3   4   12.89    2.56 
 -14  -3   4    0.23    1.42 
 -14   3   4    0.89    1.52 
 -13  -3   4   58.18    4.10 
 -13  -3   4   57.28    3.67 
 -12  -3   4    1.14    1.35 
 -12  -3   4   -0.37    0.96 
 -12   3   4    0.72    1.18 
 -11  -3   4  100.50    4.84 
 -11  -3   4  104.30    4.61 
 -11   3   4   94.21    4.67 
 -10  -3   4    3.24    1.20 
 -10  -3   4   11.80    1.72 
 -10   3   4    0.75    0.97 
  -9  -3   4   48.31    2.95 
  -9  -3   4   45.34    2.66 
  -9   3   4   50.71    2.99 
  -9   3   4   40.95    2.41 
  -8  -3   4    2.55    0.89 
  -8  -3   4    1.83    0.95 
  -8   3   4    2.42    0.84 
  -8   3   4    1.95    0.89 
  -7  -3   4    0.78    0.72 
  -7  -3   4    0.14    0.62 
  -7   3   4   -0.38    0.55 
  -7   3   4    0.17    0.54 
   6  -3  -4   15.76    0.95 
  -6  -3   4   16.57    1.59 
  -6  -3   4   15.53    1.40 
  -6   3   4   17.49    1.60 
  -6   3   4   16.05    1.24 
   5  -3  -4   68.43    2.06 
  -5  -3   4   63.90    2.75 
  -5  -3   4   69.66    2.73 
  -5   3   4   63.47    2.71 
  -5   3   4   64.83    2.36 
  -4  -3   4    2.24    0.68 
  -4  -3   4    1.27    0.51 
   4  -3  -4    2.96    0.47 
  -4   3   4    2.95    0.71 
  -4   3   4    2.31    0.51 
   3  -3  -4  304.21    6.65 
  -3  -3   4  306.79    7.43 
  -3   3   4  293.92    7.36 
  -2  -3   4  202.16    5.21 
   2  -3  -4  211.47    4.77 
   2   3  -4  201.66    5.11 
   0  -3  -4  131.60    3.41 
   0   3   4  129.09    3.20 
   0   3  -4  129.47    3.46 
  -1  -3  -4   62.67    2.10 
  -1  -3  -4   63.03    1.64 
  -1   3  -4   59.57    2.05 
  -2  -3  -4   11.70    0.97 
  -2  -3  -4   13.48    0.63 
  -2   3  -4   11.93    0.93 
  -3  -3  -4    0.25    0.45 
  -3  -3  -4    0.48    0.28 
  -3   3  -4   -0.18    0.37 
  -4  -3  -4    6.47    0.98 
  -4  -3  -4    6.16    0.61 
  -4   3  -4    5.67    0.86 
  -5  -3  -4   51.22    1.91 
  -5  -3  -4   50.54    2.54 
  -5   3  -4   50.59    2.31 
  -6  -3  -4    6.25    1.18 
  -6  -3  -4    6.58    0.83 
  -6   3  -4    7.64    1.11 
  -7  -3  -4   97.52    4.07 
  -7  -3  -4   94.67    3.26 
  -7   3  -4   92.72    3.66 
  -8  -3  -4    0.67    0.62 
  -8  -3  -4   -0.03    0.81 
  -8   3  -4    0.52    0.74 
  -9  -3  -4  115.25    4.99 
  -9  -3  -4  111.92    4.06 
  -9   3  -4  104.60    4.39 
 -10  -3  -4   -0.25    0.77 
 -10  -3  -4   -0.35    1.10 
 -10   3  -4    0.52    0.95 
 -11  -3  -4   30.74    3.01 
 -11   3  -4   31.80    2.69 
 -12  -3  -4    1.18    1.62 
 -12   3  -4    3.91    1.44 
 -13  -3  -4   -0.03    1.47 
 -13   3  -4    2.02    1.43 
 -14  -3  -4   -0.90    1.72 
 -15   4   4   17.58    2.98 
 -14  -4   4    7.84    2.17 
 -14   4   4    9.32    2.27 
 -13  -4   4    3.34    1.52 
 -13  -4   4    5.66    1.93 
 -13   4   4    4.70    1.80 
 -12  -4   4    4.93    1.81 
 -12  -4   4    2.90    1.34 
 -12   4   4    3.08    1.42 
 -11  -4   4    3.20    1.29 
 -11  -4   4    2.46    1.38 
 -11   4   4    4.17    1.51 
 -10  -4   4    4.94    1.41 
 -10  -4   4    4.13    1.25 
 -10   4   4    3.10    1.24 
  -9  -4   4   27.31    2.44 
  -9  -4   4   31.60    2.26 
  -9   4   4   25.23    2.31 
  -9   4   4   27.42    1.89 
  -8  -4   4   34.12    2.47 
  -8  -4   4   33.56    2.16 
  -8   4   4   31.72    2.29 
  -8   4   4   32.08    1.92 
   7  -4  -4   81.34    2.60 
  -7  -4   4   82.98    3.61 
  -7  -4   4   79.55    3.31 
  -7   4   4   85.21    3.58 
  -7   4   4   74.67    2.91 
  -6  -4   4  152.12    5.14 
   6  -4  -4  161.29    4.13 
  -6  -4   4  168.82    5.02 
  -6   4   4  155.30    5.11 
  -6   4   4  163.31    4.53 
  -5  -4   4   77.79    2.98 
   5  -4  -4   85.85    2.49 
  -5  -4   4   79.33    3.18 
  -5   4   4   80.39    3.14 
  -5   4   4   79.68    2.62 
  -4  -4   4   79.47    3.03 
  -4  -4   4   82.46    2.92 
   4  -4  -4   85.39    2.46 
  -4   4   4   83.17    2.50 
  -4   4   4   77.96    2.93 
  -3  -4   4    5.58    0.78 
  -3  -4   4    4.87    0.78 
   3  -4  -4    6.56    0.63 
  -3   4   4    7.14    0.83 
  -2  -4   4    3.74    0.63 
   2  -4  -4    2.78    0.48 
  -2   4   4    1.90    0.47 
   2   4  -4    3.14    0.55 
  -1  -4   4   37.24    1.55 
   1   4  -4   39.50    1.57 
   0  -4  -4   10.14    0.75 
   0   4   4   10.21    0.61 
   0   4  -4    9.28    0.79 
  -1  -4  -4   30.32    0.92 
  -1  -4  -4   30.48    1.39 
  -1   4  -4   31.13    1.41 
  -2  -4  -4   26.97    1.44 
  -2  -4  -4   26.59    0.85 
  -3  -4  -4  273.32    5.95 
  -3  -4  -4  266.93    6.93 
  -3   4  -4  263.96    6.79 
  -4  -4  -4  252.14    5.76 
  -4  -4  -4  253.65    6.82 
  -4   4  -4  242.53    6.56 
  -4   4  -4  251.19    6.24
[truncated: 4,818,116 more chars]
